# Supplementary material for: CLICK-chemoproteomics and molecular dynamics simulation reveals pregnenolone targets and their binding conformations in Th2 cells
Source: Frontiers journal article supplement (doi:10.3389/fimmu.2023.1229703), 2023-10-31
Supplement: Data_Sheet_3.xls [file Data_Sheet_3.xls]

## Sheet: CLUH
Res	dGbind	Coulomb	Solvation	Covalent	vdW	H-bond	Lipo	Pi-Pi	Contact
_:0(*)	-30.31	-6.2	7.92	0	-24.04	-0.44	-8.43	0	0
_:1(NA)	0	0	0	0	0	0	0	0	0
_:2(NA)	0	0	0	0	0	0	0	0	0
_:3(NA)	0	0	0	0	0	0	0	0	0
_:4(NA)	0	0	0	0	0	0	0	0	0
_:5(NA)	0	0	0	0	0	0	0	0	0
_:6(NA)	0	0	0	0	0	0	0	0	0
_:7(NA)	0	0	0	0	0	0	0	0	0
_:8(NA)	0	0	0	0	0	0	0	0	0
_:9(NA)	0	0	0	0	0	0	0	0	0
_:10(NA)	0	0	0	0	0	0	0	0	0
_:11(NA)	0	0	0	0	0	0	0	0	0
_:12(NA)	0	0	0	0	0	0	0	0	0
_:13(NA)	0	0	0	0	0	0	0	0	0
_:14(NA)	0	0	0	0	0	0	0	0	0
_:15(NA)	0	0	0	0	0	0	0	0	0
_:16(NA)	0	0	0	0	0	0	0	0	0
_:17(NA)	0	-0.01	0.01	0	0	0	0	0	0
_:18(NA)	0	0	0	0	0	0	0	0	0
_:19(NA)	0	0	0	0	0	0	0	0	0
_:20(NA)	0	0	0	0	0	0	0	0	0
_:21(NA)	0	0	0	0	0	0	0	0	0
_:22(NA)	0	0	0	0	0	0	0	0	0
_:23(NA)	0	0	0	0	0	0	0	0	0
_:24(NA)	0	0	0	0	0	0	0	0	0
_:25(NA)	0	0	0	0	0	0	0	0	0
_:26(NA)	0	0	0	0	0	0	0	0	0
_:27(NA)	0	0	0	0	0	0	0	0	0
_:28(NA)	0	0.01	-0.01	0	0	0	0	0	0
_:29(NA)	0	0	0	0	0	0	0	0	0
_:30(NA)	0	0	0	0	0	0	0	0	0
_:31(NA)	0	0	0	0	0	0	0	0	0
_:32(NA)	0	0	0	0	0	0	0	0	0
_:33(NA)	0	0	0	0	0	0	0	0	0
_:34(NA)	0	0	0	0	0	0	0	0	0
_:35(NA)	0	0	0	0	0	0	0	0	0
_:36(NA)	0	0	0	0	0	0	0	0	0
_:37(NA)	0	0	0	0	0	0	0	0	0
_:38(NA)	0	0	0	0	0	0	0	0	0
_:39(NA)	0	0	0	0	0	0	0	0	0
_:40(NA)	0	0	0	0	0	0	0	0	0
_:41(NA)	0	0	0	0	0	0	0	0	0
_:42(NA)	0	0	0	0	0	0	0	0	0
_:43(NA)	0	0	0	0	0	0	0	0	0
_:44(NA)	0	0.01	-0.01	0	0	0	0	0	0
_:45(NA)	0	0	0	0	0	0	0	0	0
_:46(NA)	0	0.01	-0.01	0	0	0	0	0	0
_:47(NA)	0	0	0	0	0	0	0	0	0
_:48(NA)	0	0	0	0	0	0	0	0	0
_:49(NA)	0	0	0	0	0	0	0	0	0
_:50(NA)	0	0	0	0	0	0	0	0	0
_:51(NA)	0	0	0	0	0	0	0	0	0
_:52(NA)	0	0	0	0	0	0	0	0	0
_:53(NA)	0	0	0	0	0	0	0	0	0
_:54(NA)	0	0	0	0	0	0	0	0	0
_:55(NA)	0	0	0	0	0	0	0	0	0
_:56(NA)	0	0	0	0	0	0	0	0	0
_:57(NA)	0	0	0	0	0	0	0	0	0
_:58(NA)	0	0	0	0	0	0	0	0	0
_:59(NA)	0	0	0	0	0	0	0	0	0
_:60(NA)	0	0	0	0	0	0	0	0	0
_:61(NA)	0	0	0	0	0	0	0	0	0
_:62(NA)	0	0	0	0	0	0	0	0	0
_:63(NA)	0	0	0	0	0	0	0	0	0
_:64(NA)	0	0	0	0	0	0	0	0	0
_:65(NA)	0	0	0	0	0	0	0	0	0
_:66(NA)	0	0	0	0	0	0	0	0	0
_:67(NA)	0	0	0	0	0	0	0	0	0
_:68(NA)	0	0	0	0	0	0	0	0	0
_:69(NA)	0	0	0	0	0	0	0	0	0
_:70(NA)	0	0	0	0	0	0	0	0	0
_:71(NA)	0	0	0	0	0	0	0	0	0
_:72(NA)	0	0	0	0	0	0	0	0	0
_:73(NA)	0	0	0	0	0	0	0	0	0
_:74(NA)	0	0	0	0	0	0	0	0	0
_:75(NA)	0	0	0	0	0	0	0	0	0
_:76(NA)	0	0.01	-0.01	0	0	0	0	0	0
_:77(NA)	0	0	0	0	0	0	0	0	0
_:78(NA)	0	0	0	0	0	0	0	0	0
_:79(NA)	0	0	0	0	0	0	0	0	0
_:80(NA)	0	0	0	0	0	0	0	0	0
_:81(NA)	0	0	0	0	0	0	0	0	0
_:82(NA)	0	0	0	0	0	0	0	0	0
_:83(NA)	0	0	0	0	0	0	0	0	0
_:84(NA)	0	0	0	0	0	0	0	0	0
_:85(NA)	0	0	0	0	0	0	0	0	0
_:86(NA)	0	0	0	0	0	0	0	0	0
_:87(NA)	0	0	0	0	0	0	0	0	0
_:88(NA)	0	0	0	0	0	0	0	0	0
_:89(NA)	0	0	0	0	0	0	0	0	0
_:90(NA)	0	0	0	0	0	0	0	0	0
_:91(NA)	0	0	0	0	0	0	0	0	0
_:92(NA)	0	0	0	0	0	0	0	0	0
_:93(NA)	0	0	0	0	0	0	0	0	0
_:94(NA)	0	0	0	0	0	0	0	0	0
_:95(NA)	0	0.01	-0.01	0	0	0	0	0	0
_:96(NA)	0	0	0	0	0	0	0	0	0
_:97(NA)	0	0	0	0	0	0	0	0	0
_:98(NA)	0	0	0	0	0	0	0	0	0
_:99(NA)	0	0	0	0	0	0	0	0	0
_:100(NA)	0	0	0	0	0	0	0	0	0
_:101(NA)	0	0	0	0	0	0	0	0	0
_:102(NA)	0	0	0	0	0	0	0	0	0
_:103(NA)	0	0	0	0	0	0	0	0	0
_:104(NA)	0	0	0	0	0	0	0	0	0
_:105(NA)	0	0	0	0	0	0	0	0	0
_:106(NA)	0	0	0	0	0	0	0	0	0
_:107(NA)	0	0	0	0	0	0	0	0	0
_:108(NA)	0	0	0	0	0	0	0	0	0
_:109(NA)	0	0	0	0	0	0	0	0	0
_:110(NA)	0	0	0	0	0	0	0	0	0
_:111(NA)	0	0	0	0	0	0	0	0	0
_:112(NA)	0	0	0	0	0	0	0	0	0
_:113(NA)	0	0	0	0	0	0	0	0	0
_:114(NA)	0	0	0	0	0	0	0	0	0
_:115(NA)	0	0.01	0	0	0	0	0	0	0
_:116(NA)	0	0	0	0	0	0	0	0	0
_:117(NA)	0	0	0	0	0	0	0	0	0
_:118(NA)	0	0	0	0	0	0	0	0	0
_:119(NA)	0	0	0	0	0	0	0	0	0
_:120(NA)	0	0	0	0	0	0	0	0	0
_:121(NA)	0	0	0	0	0	0	0	0	0
_:122(NA)	0	0	0	0	0	0	0	0	0
_:123(NA)	0	0	0	0	0	0	0	0	0
_:124(NA)	0	0	0	0	0	0	0	0	0
_:125(NA)	0	0	0	0	0	0	0	0	0
_:126(NA)	0	0	0	0	0	0	0	0	0
_:127(NA)	0	0	0	0	0	0	0	0	0
_:128(NA)	0	0	0	0	0	0	0	0	0
_:129(NA)	0	0	0	0	0	0	0	0	0
_:130(NA)	0	0	0	0	0	0	0	0	0
_:131(NA)	0	0	0	0	0	0	0	0	0
_:132(NA)	0	0	0	0	0	0	0	0	0
_:133(NA)	0	0	0	0	0	0	0	0	0
_:134(NA)	0	0	0	0	0	0	0	0	0
_:135(NA)	0	0.01	-0.01	0	0	0	0	0	0
_:136(NA)	0	0	0	0	0	0	0	0	0
_:137(NA)	0	0	0	0	0	0	0	0	0
_:138(NA)	0	0	0	0	0	0	0	0	0
_:139(NA)	0	0	0	0	0	0	0	0	0
_:140(NA)	0	0	0	0	0	0	0	0	0
_:141(NA)	0	0	0	0	0	0	0	0	0
_:142(NA)	0	0	0	0	0	0	0	0	0
_:143(NA)	0	0	0	0	0	0	0	0	0
_:144(NA)	0	0	0	0	0	0	0	0	0
_:145(NA)	0	0	0	0	0	0	0	0	0
_:146(NA)	0	0	0	0	0	0	0	0	0
_:147(NA)	0	0	0	0	0	0	0	0	0
_:148(NA)	0	0	0	0	0	0	0	0	0
_:149(NA)	0	0	0	0	0	0	0	0	0
_:150(NA)	0	0	0	0	0	0	0	0	0
_:151(NA)	0	0	0	0	0	0	0	0	0
_:152(NA)	0	0	0	0	0	0	0	0	0
_:153(NA)	0	0	0	0	0	0	0	0	0
_:154(NA)	0	0	0	0	0	0	0	0	0
_:155(NA)	0	0	0	0	0	0	0	0	0
_:156(NA)	0	0	0	0	0	0	0	0	0
_:157(NA)	0	0	0	0	0	0	0	0	0
_:158(NA)	0	0	0	0	0	0	0	0	0
_:159(NA)	0	0	0	0	0	0	0	0	0
_:160(NA)	0	0	0	0	0	0	0	0	0
_:161(NA)	0	0	0	0	0	0	0	0	0
_:162(NA)	0	0	0	0	0	0	0	0	0
_:163(NA)	0	0	0	0	0	0	0	0	0
_:164(NA)	0	0	0	0	0	0	0	0	0
_:165(NA)	0	0.01	-0.01	0	0	0	0	0	0
_:166(NA)	0	0	0	0	0	0	0	0	0
_:167(NA)	0	0	0	0	0	0	0	0	0
_:168(NA)	0	0	0	0	0	0	0	0	0
_:169(NA)	0	0	0	0	0	0	0	0	0
_:170(NA)	0	0	0	0	0	0	0	0	0
_:171(NA)	0	0	0	0	0	0	0	0	0
_:172(NA)	0	0	0	0	0	0	0	0	0
_:173(NA)	0	0	0	0	0	0	0	0	0
_:174(NA)	0	0	0	0	0	0	0	0	0
_:175(NA)	0	0	0	0	0	0	0	0	0
_:176(NA)	0	0	0	0	0	0	0	0	0
_:177(NA)	0	0	0	0	0	0	0	0	0
_:178(NA)	0	0	0	0	0	0	0	0	0
_:179(NA)	0	0	0	0	0	0	0	0	0
_:180(NA)	0	0	0	0	0	0	0	0	0
_:181(NA)	0	0	0	0	0	0	0	0	0
_:182(NA)	0	0	0	0	0	0	0	0	0
_:183(NA)	0	0	0	0	0	0	0	0	0
_:184(NA)	0	0	0	0	0	0	0	0	0
_:185(NA)	0	0	0	0	0	0	0	0	0
_:186(NA)	0	0	0	0	0	0	0	0	0
_:187(NA)	0	0	0	0	0	0	0	0	0
_:188(NA)	0	0	0	0	0	0	0	0	0
_:189(NA)	0	0	0	0	0	0	0	0	0
_:190(NA)	0	0	0	0	0	0	0	0	0
_:191(NA)	0	0	0	0	0	0	0	0	0
_:192(NA)	0	0	0	0	0	0	0	0	0
_:193(NA)	0	0	0	0	0	0	0	0	0
_:194(NA)	0	0	0	0	0	0	0	0	0
_:195(NA)	0	0	0	0	0	0	0	0	0
_:196(NA)	0	0	0	0	0	0	0	0	0
_:197(NA)	0	0	0	0	0	0	0	0	0
_:198(NA)	0	0	0	0	0	0	0	0	0
_:199(CL)	0	0	0	0	0	0	0	0	0
_:200(NA)	0	0	0	0	0	0	0	0	0
_:201(CL)	0	0	0	0	0	0	0	0	0
_:202(NA)	0	0	0	0	0	0	0	0	0
_:203(CL)	0	0	0	0	0	0	0	0	0
_:204(NA)	0	0	0	0	0	0	0	0	0
_:205(CL)	0	0	0	0	0	0	0	0	0
_:206(NA)	0	0	0	0	0	0	0	0	0
_:207(CL)	0	0	0	0	0	0	0	0	0
_:208(NA)	0	0	0	0	0	0	0	0	0
_:209(CL)	0	0	0	0	0	0	0	0	0
_:210(NA)	0	0	0	0	0	0	0	0	0
_:211(CL)	0	0	0	0	0	0	0	0	0
_:212(NA)	0	0	0	0	0	0	0	0	0
_:213(CL)	0	0	0	0	0	0	0	0	0
_:214(NA)	0	0	0	0	0	0	0	0	0
_:215(CL)	0	0	0	0	0	0	0	0	0
_:216(NA)	0	0	0	0	0	0	0	0	0
_:217(CL)	0	0	0	0	0	0	0	0	0
_:218(NA)	0	0	0	0	0	0	0	0	0
_:219(CL)	0	0.01	0	0	0	0	0	0	0
_:220(NA)	0	0	0	0	0	0	0	0	0
_:221(CL)	0	0	0	0	0	0	0	0	0
_:222(NA)	0	0	0	0	0	0	0	0	0
_:223(CL)	0	0	0	0	0	0	0	0	0
_:224(NA)	0	0	0	0	0	0	0	0	0
_:225(CL)	0	0	0	0	0	0	0	0	0
_:226(NA)	0	0	0	0	0	0	0	0	0
_:227(CL)	0	0	0	0	0	0	0	0	0
_:228(NA)	0	0	0	0	0	0	0	0	0
_:229(CL)	0	0	0	0	0	0	0	0	0
_:230(NA)	0	0	0	0	0	0	0	0	0
_:231(CL)	0	0	0	0	0	0	0	0	0
_:232(NA)	0	0.01	0	0	0	0	0	0	0
_:233(CL)	0	0	0	0	0	0	0	0	0
_:234(NA)	0	0	0	0	0	0	0	0	0
_:235(CL)	0	0	0	0	0	0	0	0	0
_:236(NA)	0	0	0	0	0	0	0	0	0
_:237(CL)	0	0	0.01	0	0	0	0	0	0
_:238(NA)	0	0	0	0	0	0	0	0	0
_:239(CL)	0	0.01	-0.01	0	0	0	0	0	0
_:240(NA)	0	0	0	0	0	0	0	0	0
_:241(CL)	0	0	0	0	0	0	0	0	0
_:242(NA)	0	0	0	0	0	0	0	0	0
_:243(CL)	0	0	0	0	0	0	0	0	0
_:244(NA)	0	0	0	0	0	0	0	0	0
_:245(CL)	0	0	0	0	0	0	0	0	0
_:246(NA)	0	0	0	0	0	0	0	0	0
_:247(CL)	0	-0.01	0.01	0	0	0	0	0	0
_:248(NA)	0	0	0	0	0	0	0	0	0
_:249(CL)	0	0	0	0	0	0	0	0	0
_:250(NA)	0	0	0	0	0	0	0	0	0
_:251(CL)	0	0	0	0	0	0	0	0	0
_:252(NA)	0	0.01	0	0	0	0	0	0	0
_:253(CL)	0	0	0	0	0	0	0	0	0
_:254(NA)	0	0	0	0	0	0	0	0	0
_:255(CL)	0	0	0	0	0	0	0	0	0
_:256(NA)	0	0	0	0	0	0	0	0	0
_:257(CL)	0	0	0	0	0	0	0	0	0
_:258(NA)	0	0	0	0	0	0	0	0	0
_:259(CL)	0	0	0	0	0	0	0	0	0
_:260(NA)	0	0	0	0	0	0	0	0	0
_:261(CL)	0	0	0	0	0	0	0	0	0
_:262(CL)	0	-0.01	0.01	0	0	0	0	0	0
_:263(CL)	0	0	0	0	0	0	0	0	0
_:264(CL)	0	0	0	0	0	0	0	0	0
_:265(CL)	0	-0.01	0.01	0	0	0	0	0	0
_:266(CL)	0	0	0	0	0	0	0	0	0
_:267(CL)	0	0	0	0	0	0	0	0	0
_:268(CL)	0	0	0	0	0	0	0	0	0
_:269(CL)	0	0	0	0	0	0	0	0	0
_:270(CL)	0	0	0	0	0	0	0	0	0
_:271(CL)	0	0	0	0	0	0	0	0	0
_:272(CL)	0	0	0	0	0	0	0	0	0
_:273(CL)	0	0	0	0	0	0	0	0	0
_:274(CL)	0	0	0	0	0	0	0	0	0
_:275(CL)	0	0	0	0	0	0	0	0	0
_:276(CL)	0	0	0	0	0	0	0	0	0
_:277(CL)	0	0	0	0	0	0	0	0	0
_:278(CL)	0	0	0	0	0	0	0	0	0
_:279(CL)	0	0	0	0	0	0	0	0	0
_:280(CL)	0	0	0	0	0	0	0	0	0
_:281(CL)	0	0	0	0	0	0	0	0	0
_:282(CL)	0	0	0	0	0	0	0	0	0
_:283(CL)	0	0	0	0	0	0	0	0	0
_:284(CL)	0	0	0	0	0	0	0	0	0
_:285(CL)	0	0.01	-0.01	0	0	0	0	0	0
_:286(CL)	0	0	0	0	0	0	0	0	0
_:287(CL)	0	0	0	0	0	0	0	0	0
_:288(CL)	0	0	0	0	0	0	0	0	0
_:289(CL)	0	0	0	0	0	0	0	0	0
_:290(CL)	0	0	0	0	0	0	0	0	0
_:291(CL)	0	0	0	0	0	0	0	0	0
_:292(CL)	0	-0.01	0.01	0	0	0	0	0	0
_:293(CL)	0	0	0	0	0	0	0	0	0
_:294(CL)	0	0	0	0	0	0	0	0	0
_:295(CL)	0	-0.01	0.01	0	0	0	0	0	0
_:296(CL)	0.01	0	0.01	0	0	0	0	0	0
_:297(CL)	0	0	0	0	0	0	0	0	0
_:298(CL)	0	0.01	-0.01	0	0	0	0	0	0
_:299(CL)	0	0	0	0	0	0	0	0	0
_:300(CL)	0	0	0	0	0	0	0	0	0
_:301(CL)	0	0.01	0	0	0	0	0	0	0
_:302(CL)	0	0	0	0	0	0	0	0	0
_:303(CL)	0	0	0	0	0	0	0	0	0
_:304(CL)	0	0	0	0	0	0	0	0	0
_:305(CL)	0	0	0	0	0	0	0	0	0
_:306(CL)	0.04	-0.02	0.08	0	-0.02	0	0	0	0
_:307(CL)	0	0	0	0	0	0	0	0	0
_:308(CL)	0	0	0	0	0	0	0	0	0
_:309(CL)	0	0	0	0	0	0	0	0	0
_:310(CL)	0	0	0	0	0	0	0	0	0
_:311(CL)	0	-0.01	0.01	0	0	0	0	0	0
_:312(CL)	0	0	0.01	0	0	0	0	0	0
_:313(CL)	0	0	0	0	0	0	0	0	0
_:314(CL)	0	0	0	0	0	0	0	0	0
_:315(CL)	0	0	0	0	0	0	0	0	0
_:316(CL)	0	0	0	0	0	0	0	0	0
_:317(CL)	0	-0.01	0.01	0	0	0	0	0	0
_:318(CL)	0	0	0	0	0	0	0	0	0
_:319(CL)	0	0	0	0	0	0	0	0	0
_:320(CL)	0	0	0	0	0	0	0	0	0
_:321(CL)	0	0	0	0	0	0	0	0	0
_:322(CL)	0	0	0	0	0	0	0	0	0
_:323(CL)	0	0	0	0	0	0	0	0	0
_:324(CL)	0	0	0	0	0	0	0	0	0
_:325(CL)	0	0	0	0	0	0	0	0	0
_:326(CL)	0	0	0	0	0	0	0	0	0
_:327(CL)	0	0	0	0	0	0	0	0	0
_:328(CL)	0	0	0	0	0	0	0	0	0
_:329(CL)	0	0	0	0	0	0	0	0	0
_:330(CL)	0	0	0	0	0	0	0	0	0
_:331(CL)	0	0	0	0	0	0	0	0	0
_:332(CL)	0	0	0	0	0	0	0	0	0
_:333(CL)	0	0	0	0	0	0	0	0	0
_:334(CL)	0	0	0	0	0	0	0	0	0
_:335(CL)	0	0	0	0	0	0	0	0	0
_:336(CL)	0	0	0	0	0	0	0	0	0
_:337(CL)	0	0	0	0	0	0	0	0	0
_:338(CL)	0	0	0	0	0	0	0	0	0
_:339(CL)	0	0	0	0	0	0	0	0	0
_:340(CL)	0	0	0	0	0	0	0	0	0
_:341(CL)	0	0	0	0	0	0	0	0	0
_:342(CL)	0	0	0	0	0	0	0	0	0
_:343(CL)	0	-0.02	0.02	0	0	0	0	0	0
_:344(CL)	0	0	0	0	0	0	0	0	0
_:345(CL)	0	0	0	0	0	0	0	0	0
_:346(CL)	0	-0.01	0.01	0	0	0	0	0	0
_:347(CL)	0	0	0	0	0	0	0	0	0
_:348(CL)	0	0	0	0	0	0	0	0	0
_:349(CL)	0	0	0	0	0	0	0	0	0
_:350(CL)	0	0	0	0	0	0	0	0	0
_:351(CL)	0	-0.01	0.01	0	0	0	0	0	0
_:352(CL)	0	0	0	0	0	0	0	0	0
_:353(CL)	0	0	0	0	0	0	0	0	0
_:354(CL)	0	0	0	0	0	0	0	0	0
_:355(CL)	0	0	0	0	0	0	0	0	0
_:356(CL)	0	0	0	0	0	0	0	0	0
_:357(CL)	0	0	0	0	0	0	0	0	0
_:358(CL)	0	0	0	0	0	0	0	0	0
_:359(CL)	0	0	0	0	0	0	0	0	0
_:360(CL)	0	0	0	0	0	0	0	0	0
_:361(CL)	0	0	0	0	0	0	0	0	0
_:362(CL)	0	0	0	0	0	0	0	0	0
_:363(CL)	0	0	0	0	0	0	0	0	0
_:364(CL)	0	0	0	0	0	0	0	0	0
_:365(CL)	0	0.02	-0.01	0	0	0	0	0	0
_:366(CL)	0	0	0	0	0	0	0	0	0
_:367(CL)	0	0	0	0	0	0	0	0	0
_:368(CL)	0	0	0	0	0	0	0	0	0
_:369(CL)	0	0	0	0	0	0	0	0	0
_:370(CL)	0	0	0	0	0	0	0	0	0
_:371(CL)	0	-0.01	0.01	0	0	0	0	0	0
_:372(CL)	0	0	0	0	0	0	0	0	0
_:373(CL)	0	-0.01	0.01	0	0	0	0	0	0
_:374(CL)	0	0	0	0	0	0	0	0	0
_:375(CL)	0	0	0	0	0	0	0	0	0
_:376(CL)	0	0	0	0	0	0	0	0	0
_:377(CL)	0	-0.02	0.02	0	0	0	0	0	0
_:378(CL)	0	0	0	0	0	0	0	0	0
_:379(CL)	0	0	0	0	0	0	0	0	0
_:380(CL)	0	0	0	0	0	0	0	0	0
_:381(CL)	0	0	0	0	0	0	0	0	0
_:382(CL)	0	0	0	0	0	0	0	0	0
_:383(CL)	0	0	0	0	0	0	0	0	0
_:384(CL)	0	0	0	0	0	0	0	0	0
_:385(CL)	0	0	0.01	0	0	0	0	0	0
_:386(CL)	0	0	0	0	0	0	0	0	0
_:387(CL)	0	0	0	0	0	0	0	0	0
_:388(CL)	0	0	0	0	0	0	0	0	0
_:389(CL)	0	0	0	0	0	0	0	0	0
_:390(CL)	0	0	0	0	0	0	0	0	0
_:391(CL)	0	0	0	0	0	0	0	0	0
_:392(CL)	0.01	-0.01	0.02	0	0	0	0	0	0
_:393(CL)	0	0	0	0	0	0	0	0	0
_:394(CL)	0	0	0	0	0	0	0	0	0
_:395(CL)	0	0	0	0	0	0	0	0	0
_:396(CL)	0	0	0	0	0	0	0	0	0
_:397(CL)	0	0	0	0	0	0	0	0	0
_:398(CL)	0	0	0	0	0	0	0	0	0
_:399(CL)	0	0	0	0	0	0	0	0	0
_:400(CL)	0	0	0	0	0	0	0	0	0
_:401(CL)	0	0	0	0	0	0	0	0	0
_:402(CL)	0	0	0	0	0	0	0	0	0
_:403(CL)	0	0	0	0	0	0	0	0	0
_:404(CL)	0	0	0	0	0	0	0	0	0
_:405(CL)	0	0	0	0	0	0	0	0	0
_:406(CL)	0	0	0	0	0	0	0	0	0
_:407(CL)	0	-0.01	0.01	0	0	0	0	0	0
_:408(CL)	0	0	0	0	0	0	0	0	0
_:409(CL)	0	0	0	0	0	0	0	0	0
_:410(CL)	0	0.01	0	0	0	0	0	0	0
_:411(CL)	0	0	0	0	0	0	0	0	0
_:412(CL)	0	0	0	0	0	0	0	0	0
_:413(CL)	0	0	0	0	0	0	0	0	0
_:414(CL)	0	0	0	0	0	0	0	0	0
_:415(CL)	0	0	0	0	0	0	0	0	0
_:416(CL)	0	0	0.01	0	0	0	0	0	0
_:417(CL)	0	0	0	0	0	0	0	0	0
_:418(CL)	0	0.01	-0.01	0	0	0	0	0	0
_:419(CL)	0	0	0	0	0	0	0	0	0
_:420(CL)	0	0	0	0	0	0	0	0	0
_:421(CL)	0	0	0	0	0	0	0	0	0
_:422(CL)	0	0	0.01	0	0	0	0	0	0
_:423(CL)	0	0	0	0	0	0	0	0	0
_:424(CL)	0	0	0	0	0	0	0	0	0
_:425(CL)	0	0.01	0	0	0	0	0	0	0
_:426(CL)	0	0	0	0	0	0	0	0	0
A:1(MET)	0	0.02	-0.02	0	0	0	0	0	0
A:2(LEU)	0	0	0	0	0	0	0	0	0
A:3(LEU)	0	0	0	0	0	0	0	0	0
A:4(ASN)	0	0	0	0	0	0	0	0	0
A:5(GLY)	0	0	0	0	0	0	0	0	0
A:6(ASP)	0	-0.01	0.01	0	0	0	0	0	0
A:7(CYS)	0	0	0	0	0	0	0	0	0
A:8(SER)	0	0	0	0	0	0	0	0	0
A:9(GLU)	0	-0.01	0.01	0	0	0	0	0	0
A:10(ASN)	0	0	0	0	0	0	0	0	0
A:11(LEU)	0	0	0	0	0	0	0	0	0
A:12(LYS)	0	0.01	-0.01	0	0	0	0	0	0
A:13(LYS)	0	0.01	-0.01	0	0	0	0	0	0
A:14(GLU)	0	0	0	0	0	0	0	0	0
A:15(GLU)	0	0	0	0	0	0	0	0	0
A:16(GLY)	0	0	0	0	0	0	0	0	0
A:17(THR)	0	0	0	0	0	0	0	0	0
A:18(SER)	0	0	0	0	0	0	0	0	0
A:19(GLU)	0	-0.01	0	0	0	0	0	0	0
A:20(PRO)	0	0	0	0	0	0	0	0	0
A:21(PRO)	0	0	0	0	0	0	0	0	0
A:22(ARG)	0	0.01	-0.01	0	0	0	0	0	0
A:23(GLU)	0	0	0	0	0	0	0	0	0
A:24(ASN)	0	0	0	0	0	0	0	0	0
A:25(GLY)	0	0	0	0	0	0	0	0	0
A:26(LEU)	0	0	0	0	0	0	0	0	0
A:27(ASP)	0	-0.01	0.01	0	0	0	0	0	0
A:28(GLU)	0	-0.01	0.01	0	0	0	0	0	0
A:29(GLY)	0	0	0	0	0	0	0	0	0
A:30(GLU)	0	-0.01	0.01	0	0	0	0	0	0
A:31(PRO)	0	0	0	0	0	0	0	0	0
A:32(GLY)	0	0	0	0	0	0	0	0	0
A:33(ASP)	0	-0.01	0.01	0	0	0	0	0	0
A:34(GLU)	0	-0.01	0.01	0	0	0	0	0	0
A:35(THR)	0	0	0	0	0	0	0	0	0
A:36(THR)	0	0	0	0	0	0	0	0	0
A:37(GLY)	0	0	0	0	0	0	0	0	0
A:38(GLN)	0	0	0	0	0	0	0	0	0
A:39(GLU)	0	-0.01	0.01	0	0	0	0	0	0
A:40(VAL)	0	0	0	0	0	0	0	0	0
A:41(ILE)	0	0	0	0	0	0	0	0	0
A:42(VAL)	0	0	0	0	0	0	0	0	0
A:43(ILE)	0	0	0	0	0	0	0	0	0
A:44(GLN)	0	0	0	0	0	0	0	0	0
A:45(ASP)	0	-0.03	0.03	0	0	0	0	0	0
A:46(THR)	0	0	0	0	0	0	0	0	0
A:47(GLY)	0	0	0	0	0	0	0	0	0
A:48(PHE)	0	0	0	0	0	0	0	0	0
A:49(SER)	0	0	0	0	0	0	0	0	0
A:50(VAL)	0	0	0	0	0	0	0	0	0
A:51(LYS)	0	0	0	0	0	0	0	0	0
A:52(ILE)	0	0	0	0	0	0	0	0	0
A:53(LEU)	0	0	0	0	0	0	0	0	0
A:54(ALA)	0	0	0	0	0	0	0	0	0
A:55(PRO)	0	0	0	0	0	0	0	0	0
A:56(GLY)	0	0	0	0	0	0	0	0	0
A:57(ILE)	0	0	0	0	0	0	0	0	0
A:58(GLU)	0	0.01	-0.01	0	0	0	0	0	0
A:59(PRO)	0	0	0	0	0	0	0	0	0
A:60(PHE)	0	0	0	0	0	0	0	0	0
A:61(SER)	0	0	0	0	0	0	0	0	0
A:62(LEU)	0	0	0	0	0	0	0	0	0
A:63(GLN)	0	0	0	0	0	0	0	0	0
A:64(VAL)	0	0	0	0	0	0	0	0	0
A:65(SER)	0	0	0	0	0	0	0	0	0
A:66(PRO)	0	0	0	0	0	0	0	0	0
A:67(GLN)	0	0	0	0	0	0	0	0	0
A:68(GLU)	0	-0.02	0.02	0	0	0	0	0	0
A:69(MET)	0	0	0	0	0	0	0	0	0
A:70(VAL)	0	0	0	0	0	0	0	0	0
A:71(GLN)	0	0	0	0	0	0	0	0	0
A:72(GLU)	0	-0.03	0.03	0	0	0	0	0	0
A:73(ILE)	0	0	0	0	0	0	0	0	0
A:74(HIE)	0.01	-0.01	0.01	0	0	0	0	0	0
A:75(GLN)	0.01	-0.01	0.02	0	0	0	0	0	0
A:76(VAL)	0	0	0.01	0	0	0	0	0	0
A:77(LEU)	0.01	0	0.01	0	0	0	0	0	0
A:78(MET)	0	0	0	0	0	0	0	0	0
A:79(ASP)	0.03	-0.09	0.13	0	0	0	0	0	0
A:80(ARG)	0.02	0.03	-0.02	0	0	0	0	0	0
A:81(GLU)	0.06	-0.05	0.12	0	-0.01	0	0	0	0
A:82(ASP)	0.02	0.01	0.02	0	0	0	0	0	0
A:83(THR)	-0.02	0	-0.02	0	0	0	0	0	0
A:84(CYS)	0	0.01	-0.01	0	0	0	0	0	0
A:85(HIS)	0.05	0	0.05	0	0	0	0	0	0
A:86(ARG)	0	-0.06	0.06	0	0	0	0	0	0
A:87(THR)	0.03	0	0.03	0	0	0	0	0	0
A:88(CYS)	0.01	0	0.01	0	0	0	0	0	0
A:89(PHE)	0.01	0	0.01	0	0	0	0	0	0
A:90(SER)	0	0	0	0	0	0	0	0	0
A:91(LEU)	0	0	0	0	0	0	0	0	0
A:92(HIP)	0	-0.01	0.01	0	0	0	0	0	0
A:93(LEU)	0	0	0	0	0	0	0	0	0
A:94(ASP)	0	0	0	0	0	0	0	0	0
A:95(GLY)	0	0	0	0	0	0	0	0	0
A:96(ASN)	0	0	0	0	0	0	0	0	0
A:97(MET)	0	0	0	0	0	0	0	0	0
A:98(LEU)	0	0	0	0	0	0	0	0	0
A:99(ASP)	0	0	0	0	0	0	0	0	0
A:100(HIE)	0	0	0	0	0	0	0	0	0
A:101(PHE)	0	0	0	0	0	0	0	0	0
A:102(SER)	0	0	0	0	0	0	0	0	0
A:103(GLU)	0	-0.01	0.01	0	0	0	0	0	0
A:104(LEU)	0	0	0	0	0	0	0	0	0
A:105(ARG)	0	0.02	-0.02	0	0	0	0	0	0
A:106(SER)	0	0	0	0	0	0	0	0	0
A:107(VAL)	0	0	0	0	0	0	0	0	0
A:108(GLU)	0	0	0	0	0	0	0	0	0
A:109(GLY)	0	0	0	0	0	0	0	0	0
A:110(LEU)	0	0	0	0	0	0	0	0	0
A:111(GLN)	0	0	0	0	0	0	0	0	0
A:112(GLU)	0	-0.01	0.01	0	0	0	0	0	0
A:113(GLY)	0	0	0	0	0	0	0	0	0
A:114(SER)	0	0	0	0	0	0	0	0	0
A:115(VAL)	0	0	0	0	0	0	0	0	0
A:116(LEU)	0	0	0	0	0	0	0	0	0
A:117(ARG)	0	-0.02	0.02	0	0	0	0	0	0
A:118(VAL)	0	0	0	0	0	0	0	0	0
A:119(VAL)	0	0	0	0	0	0	0	0	0
A:120(GLU)	0	0.02	-0.02	0	0	0	0	0	0
A:121(GLU)	0	0.02	-0.01	0	0	0	0	0	0
A:122(PRO)	0	0	0	0	0	0	0	0	0
A:123(TYR)	0.01	0	0.02	0	0	0	0	0	0
A:124(THR)	0.01	0	0.01	0	0	0	0	0	0
A:125(VAL)	0.01	0.01	0	0	0	0	0	0	0
A:126(ARG)	0	-0.01	0.02	0	0	0	0	0	0
A:127(GLU)	0	0.03	-0.02	0	0	0	0	0	0
A:128(ALA)	0.02	0.01	0	0	0	0	0	0	0
A:129(ARG)	0.02	-0.05	0.07	0	0	0	0	0	0
A:130(ILE)	0.01	0.01	0	0	0	0	0	0	0
A:131(HIS)	0.06	0.02	0.04	0	-0.01	0	0	0	0
A:132(VAL)	0.08	0.06	0.05	0	-0.03	0	0	0	0
A:133(ARG)	0.11	0	0.14	0	-0.03	0	0	0	0
A:134(HIE)	0.04	-0.04	0.1	0	-0.02	0	0	0	0
A:135(VAL)	-0.09	-0.11	0.16	0	-0.13	0	0	0	0
A:136(ARG)	-2.54	-1.28	0.6	0	-1.23	0	-0.63	0	0
A:137(ASP)	0.08	-0.13	0.31	0	-0.1	0	0	0	0
A:138(LEU)	-0.18	-0.09	0.03	0	-0.11	0	0	0	0
A:139(LEU)	-4	-0.4	0.47	0	-2.38	0	-1.69	0	0
A:140(LYS)	-2.5	0.41	-1.03	0	-1.89	0	0	0	0
A:141(SER)	-0.22	0.04	-0.11	0	-0.15	0	0	0	0
A:142(LEU)	-1.56	-0.04	0.17	0	-1.19	0	-0.5	0	0
A:143(ASP)	-1.02	-1	2.51	0	-1.84	0	-0.68	0	0
A:144(PRO)	-0.38	0.09	-0.09	0	-0.26	0	-0.12	0	0
A:145(SER)	-0.13	0.15	-0.19	0	-0.09	0	0	0	0
A:146(ASP)	0.4	-0.36	0.83	0	-0.07	0	0	0	0
A:147(ALA)	-0.02	0.05	-0.06	0	-0.01	0	0	0	0
A:148(PHE)	0.03	0.03	0.02	0	-0.01	0	0	0	0
A:149(ASN)	-0.04	0.07	-0.11	0	-0.01	0	0	0	0
A:150(GLY)	-0.02	0.02	-0.04	0	0	0	0	0	0
A:151(VAL)	0.04	-0.01	0.06	0	-0.01	0	0	0	0
A:152(ASP)	0.04	-0.18	0.22	0	-0.01	0	0	0	0
A:153(CYS)	-0.01	0.01	-0.02	0	0	0	0	0	0
A:154(ASN)	-0.02	0.01	-0.02	0	-0.01	0	0	0	0
A:155(SER)	0.02	0	0.02	0	0	0	0	0	0
A:156(LEU)	0.02	0.02	0.01	0	-0.01	0	0	0	0
A:157(SER)	0	-0.02	0.02	0	0	0	0	0	0
A:158(PHE)	0.04	-0.01	0.05	0	0	0	0	0	0
A:159(LEU)	0	0.01	0	0	0	0	0	0	0
A:160(SER)	0.01	0.01	0	0	0	0	0	0	0
A:161(VAL)	0	0.01	-0.01	0	0	0	0	0	0
A:162(PHE)	0	0.01	0	0	0	0	0	0	0
A:163(THR)	0	0	0	0	0	0	0	0	0
A:164(ASP)	0	-0.04	0.04	0	0	0	0	0	0
A:165(GLY)	0	0	0	0	0	0	0	0	0
A:166(ASP)	0.01	-0.07	0.07	0	0	0	0	0	0
A:167(LEU)	0	0	0	0	0	0	0	0	0
A:168(GLY)	0	0	0	0	0	0	0	0	0
A:169(ASP)	0	-0.02	0.02	0	0	0	0	0	0
A:170(SER)	0	0	0	0	0	0	0	0	0
A:171(GLY)	0	0.01	-0.01	0	0	0	0	0	0
A:172(LYS)	0	0.02	-0.02	0	0	0	0	0	0
A:173(ARG)	0	0.05	-0.05	0	0	0	0	0	0
A:174(LYS)	0	0.09	-0.09	0	0	0	0	0	0
A:175(LYS)	0	0.04	-0.04	0	0	0	0	0	0
A:176(GLY)	0	0	0.01	0	0	0	0	0	0
A:177(LEU)	0	0	0	0	0	0	0	0	0
A:178(GLU)	0	0	0.01	0	0	0	0	0	0
A:179(MET)	0	0	0	0	0	0	0	0	0
A:180(ASP)	0	-0.02	0.02	0	0	0	0	0	0
A:181(PRO)	0	0	0	0	0	0	0	0	0
A:182(ILE)	0	0	0	0	0	0	0	0	0
A:183(ASP)	0	-0.02	0.02	0	0	0	0	0	0
A:184(CYS)	0	0	0	0	0	0	0	0	0
A:185(THR)	0	0	0	0	0	0	0	0	0
A:186(PRO)	0	0	0	0	0	0	0	0	0
A:187(PRO)	0	0	0	0	0	0	0	0	0
A:188(GLU)	0	-0.02	0.02	0	0	0	0	0	0
A:189(TYR)	0	0	0	0	0	0	0	0	0
A:190(ILE)	0	0	0	0	0	0	0	0	0
A:191(LEU)	0	0	0	0	0	0	0	0	0
A:192(PRO)	0	0	0	0	0	0	0	0	0
A:193(GLY)	0	0	0	0	0	0	0	0	0
A:194(SER)	0	0	0	0	0	0	0	0	0
A:195(ARG)	0	0.03	-0.03	0	0	0	0	0	0
A:196(GLU)	0	-0.03	0.03	0	0	0	0	0	0
A:197(ARG)	0	0.05	-0.05	0	0	0	0	0	0
A:198(PRO)	0	0	0	0	0	0	0	0	0
A:199(LEU)	0	0	0.01	0	0	0	0	0	0
A:200(CYS)	0	-0.01	0.01	0	0	0	0	0	0
A:201(PRO)	0	0	0	0	0	0	0	0	0
A:202(LEU)	-0.01	0	-0.01	0	0	0	0	0	0
A:203(GLN)	0.01	-0.02	0.03	0	0	0	0	0	0
A:204(PRO)	0.01	-0.02	0.03	0	0	0	0	0	0
A:205(GLN)	-0.02	0.01	-0.03	0	-0.01	0	0	0	0
A:206(ASN)	0.03	0.02	0.03	0	-0.02	0	0	0	0
A:207(ARG)	0.05	0.03	0.05	0	-0.03	0	0	0	0
A:208(ASP)	0.16	-0.34	0.79	0	-0.26	0	-0.03	0	0
A:209(TRP)	-0.59	-0.17	0.4	0	-0.66	0	-0.16	0	0
A:210(LYS)	-0.13	0.17	0.34	0	-0.64	0	0	0	0
A:211(PRO)	-4.25	-0.91	-0.9	0	-1.53	0	-0.91	0	0
A:212(LEU)	-2.75	-1.62	0.99	0	-1.43	-0.24	-0.46	0	0
A:213(GLN)	-0.17	0.14	0.02	0	-0.3	0	-0.03	0	0
A:214(CYS)	-1.14	0.03	0.01	0	-0.89	0	-0.29	0	0
A:215(LEU)	-1.29	-0.08	0.91	0	-1.41	0	-0.71	0	0
A:216(LYS)	-0.45	-0.34	0.56	0	-0.66	-0.01	0	0	0
A:217(VAL)	-2.13	-0.74	-0.23	0	-0.82	0	-0.34	0	0
A:218(LEU)	-1.19	-0.76	0.61	0	-0.61	-0.14	-0.29	0	0
A:219(THR)	0.13	0.13	0.09	0	-0.09	0	0	0	0
A:220(MET)	0.07	0.03	0.04	0	-0.01	0	0	0	0
A:221(SER)	0.02	-0.01	0.03	0	0	0	0	0	0
A:222(GLY)	0.01	0	0.01	0	0	0	0	0	0
A:223(TRP)	0	-0.01	0.01	0	0	0	0	0	0
A:224(ASN)	0.01	-0.01	0.02	0	0	0	0	0	0
A:225(PRO)	0	0	0	0	0	0	0	0	0
A:226(PRO)	0	0	0	0	0	0	0	0	0
A:227(PRO)	0	0	0	0	0	0	0	0	0
A:228(GLY)	0	0	0	0	0	0	0	0	0
A:229(ASN)	0	0	0	0	0	0	0	0	0
A:230(ARG)	0	-0.06	0.06	0	0	0	0	0	0
A:231(LYS)	0	-0.03	0.03	0	0	0	0	0	0
A:232(MET)	0	0	0	0	0	0	0	0	0
A:233(HIS)	0	0	0	0	0	0	0	0	0
A:234(GLY)	0	0	0	0	0	0	0	0	0
A:235(ASP)	0	0.05	-0.05	0	0	0	0	0	0
A:236(LEU)	-0.01	-0.01	0	0	0	0	0	0	0
A:237(MET)	0.01	0	0.01	0	0	0	0	0	0
A:238(TYR)	-0.01	-0.01	0	0	0	0	0	0	0
A:239(LEU)	-0.04	-0.04	0.01	0	-0.01	0	0	0	0
A:240(PHE)	0.1	0.07	0.04	0	-0.02	0	0	0	0
A:241(VAL)	-0.13	-0.05	-0.03	0	-0.04	0	0	0	0
A:242(ILE)	0.15	0.01	0.19	0	-0.05	0	0	0	0
A:243(THR)	-0.03	-0.01	0.01	0	-0.03	0	0	0	0
A:244(ALA)	0.03	-0.02	0.08	0	-0.03	0	0	0	0
A:245(GLU)	0.05	0.15	-0.09	0	-0.01	0	0	0	0
A:246(ASP)	0	0.1	-0.09	0	-0.01	0	0	0	0
A:247(ARG)	0.04	-0.14	0.18	0	0	0	0	0	0
A:248(GLN)	-0.02	-0.01	0	0	0	0	0	0	0
A:249(VAL)	0.04	0.02	0.02	0	0	0	0	0	0
A:250(SER)	-0.01	0	-0.01	0	0	0	0	0	0
A:251(ILE)	0.02	0	0.02	0	0	0	0	0	0
A:252(THR)	0.01	0.01	0	0	0	0	0	0	0
A:253(ALA)	0.01	0	0.01	0	0	0	0	0	0
A:254(SER)	0	0	0	0	0	0	0	0	0
A:255(THR)	0	0	0	0	0	0	0	0	0
A:256(ARG)	0	-0.05	0.05	0	0	0	0	0	0
A:257(GLY)	-0.01	0	-0.01	0	0	0	0	0	0
A:258(PHE)	0.02	-0.01	0.03	0	0	0	0	0	0
A:259(TYR)	0.02	0	0.02	0	0	0	0	0	0
A:260(LEU)	0	-0.01	0.01	0	0	0	0	0	0
A:261(ASN)	0.01	0	0.01	0	0	0	0	0	0
A:262(GLN)	0	0	0	0	0	0	0	0	0
A:263(SER)	0	0	0	0	0	0	0	0	0
A:264(THR)	0	0	0.01	0	0	0	0	0	0
A:265(ALA)	0	0	0.01	0	0	0	0	0	0
A:266(TYR)	0	0	0.01	0	0	0	0	0	0
A:267(HIS)	0	0.01	0	0	0	0	0	0	0
A:268(PHE)	0	0	0	0	0	0	0	0	0
A:269(ASN)	0	0	0	0	0	0	0	0	0
A:270(PRO)	0	0	0	0	0	0	0	0	0
A:271(LYS)	0	-0.03	0.04	0	0	0	0	0	0
A:272(PRO)	0	0	0	0	0	0	0	0	0
A:273(ALA)	0	0	0	0	0	0	0	0	0
A:274(SER)	0	0.01	-0.01	0	0	0	0	0	0
A:275(PRO)	0	0	0	0	0	0	0	0	0
A:276(ARG)	0	-0.07	0.07	0	0	0	0	0	0
A:277(PHE)	0.01	0.01	0	0	0	0	0	0	0
A:278(LEU)	-0.01	0	0	0	0	0	0	0	0
A:279(SER)	0	0	0.01	0	0	0	0	0	0
A:280(HIE)	0.01	0.01	0.01	0	0	0	0	0	0
A:281(SER)	0.01	0.01	0.01	0	0	0	0	0	0
A:282(LEU)	0.04	0	0.05	0	-0.01	0	0	0	0
A:283(VAL)	0.06	0.02	0.06	0	-0.01	0	0	0	0
A:284(GLU)	0.03	0.06	-0.02	0	0	0	0	0	0
A:285(LEU)	-0.01	0	-0.01	0	0	0	0	0	0
A:286(LEU)	-0.02	0	0.01	0	-0.02	0	0	0	0
A:287(ASN)	0.06	0.03	0.03	0	-0.01	0	0	0	0
A:288(GLN)	-0.01	0	-0.01	0	0	0	0	0	0
A:289(ILE)	-0.02	0	-0.01	0	0	0	0	0	0
A:290(SER)	0.07	0.02	0.05	0	-0.01	0	0	0	0
A:291(PRO)	0	0.01	-0.01	0	0	0	0	0	0
A:292(THR)	-0.01	0.04	-0.04	0	-0.02	0	0	0	0
A:293(PHE)	0.05	0.05	0.11	0	-0.1	0	0	0	0
A:294(LYS)	0.04	-0.09	0.14	0	-0.01	0	0	0	0
A:295(LYS)	-0.03	-0.19	0.17	0	-0.01	0	0	0	0
A:296(ASN)	-0.11	0.1	-0.1	0	-0.1	0	0	0	0
A:297(PHE)	0.06	-0.01	0.15	0	-0.09	0	0	0	0
A:298(ALA)	0.01	-0.03	0.06	0	-0.01	0	0	0	0
A:299(VAL)	-0.12	-0.1	0.03	0	-0.05	0	0	0	0
A:300(LEU)	-1.4	-0.1	0.12	0	-0.89	0	-0.53	0	0
A:301(GLN)	0.07	-0.07	0.17	0	-0.03	0	0	0	0
A:302(LYS)	-0.04	-0.08	0.05	0	-0.01	0	0	0	0
A:303(LYS)	-0.29	-0.18	-0.01	0	-0.1	-0.01	0	0	0
A:304(ARG)	-0.21	0.21	-0.39	0	-0.03	0	0	0	0
A:305(VAL)	0	-0.01	0.02	0	0	0	0	0	0
A:306(GLN)	0	0	0	0	-0.01	0	0	0	0
A:307(ARG)	-0.05	0.49	-0.51	0	-0.03	0	0	0	0
A:308(HIE)	0.02	-0.03	0.05	0	0	0	0	0	0
A:309(PRO)	0	-0.01	0.01	0	0	0	0	0	0
A:310(PHE)	-0.01	0	0	0	0	0	0	0	0
A:311(GLU)	0.03	-0.18	0.2	0	0	0	0	0	0
A:312(ARG)	-0.01	0.19	-0.19	0	-0.01	0	0	0	0
A:313(ILE)	0.01	-0.02	0.02	0	0	0	0	0	0
A:314(ALA)	0	0.01	-0.01	0	0	0	0	0	0
A:315(THR)	0.01	-0.01	0.02	0	0	0	0	0	0
A:316(PRO)	0	0	0	0	0	0	0	0	0
A:317(PHE)	0	0	0.01	0	0	0	0	0	0
A:318(GLN)	0	0.01	-0.01	0	0	0	0	0	0
A:319(VAL)	0	-0.01	0.01	0	0	0	0	0	0
A:320(TYR)	0.01	0.01	-0.01	0	0	0	0	0	0
A:321(SER)	0.02	0	0.02	0	0	0	0	0	0
A:322(TRP)	0	0	0	0	0	0	0	0	0
A:323(THR)	-0.02	-0.01	-0.01	0	0	0	0	0	0
A:324(ALA)	0	0.02	-0.02	0	0	0	0	0	0
A:325(PRO)	0	-0.03	0.03	0	0	0	0	0	0
A:326(GLN)	0	0.01	0	0	-0.01	0	0	0	0
A:327(ALA)	-0.01	0	0.01	0	-0.02	0	0	0	0
A:328(GLU)	0.1	-0.08	0.24	0	-0.06	0	0	0	0
A:329(HIS)	-0.17	0.14	-0.19	0	-0.12	0	0	0	0
A:330(ALA)	-1.12	-0.04	0.09	0	-0.7	0	-0.46	0	0
A:331(MET)	-0.03	-0.09	0.83	0	-0.6	0	-0.16	0	0
A:332(ASP)	-0.06	-0.65	1.96	0	-0.99	-0.03	-0.34	0	0
A:333(CYS)	-0.13	-0.01	0.2	0	-0.27	0	-0.05	0	0
A:334(VAL)	-0.2	0.12	-0.1	0	-0.17	0	-0.05	0	0
A:335(ARG)	-0.35	0.65	-0.87	0	-0.13	0	0	0	0
A:336(ALA)	-0.04	0.02	-0.04	0	-0.01	0	0	0	0
A:337(GLU)	0.04	0	0.05	0	-0.01	0	0	0	0
A:338(ASP)	0.08	-0.01	0.1	0	-0.01	0	0	0	0
A:339(ALA)	-0.01	0.02	-0.02	0	0	0	0	0	0
A:340(TYR)	0	0	0	0	0	0	0	0	0
A:341(THR)	-0.01	0	-0.01	0	0	0	0	0	0
A:342(SER)	0	0.01	-0.01	0	0	0	0	0	0
A:343(ARG)	0.01	0.12	-0.11	0	0	0	0	0	0
A:344(LEU)	0	0	0	0	0	0	0	0	0
A:345(GLY)	0	0	-0.01	0	0	0	0	0	0
A:346(TYR)	0	0	0	0	0	0	0	0	0
A:347(GLU)	0.01	-0.04	0.05	0	0	0	0	0	0
A:348(GLU)	0.01	0	0.01	0	0	0	0	0	0
A:349(HIE)	0	0.01	0	0	0	0	0	0	0
A:350(ILE)	0	0	0	0	0	0	0	0	0
A:351(PRO)	0	0	0	0	0	0	0	0	0
A:352(GLY)	0	0	0	0	0	0	0	0	0
A:353(GLN)	0	0	0	0	0	0	0	0	0
A:354(THR)	0	0	0	0	0	0	0	0	0
A:355(ARG)	0	0.04	-0.04	0	0	0	0	0	0
A:356(ASP)	0	-0.02	0.02	0	0	0	0	0	0
A:357(TRP)	0	0	0	0	0	0	0	0	0
A:358(ASN)	0	0	0	0	0	0	0	0	0
A:359(GLU)	0	-0.02	0.02	0	0	0	0	0	0
A:360(GLU)	0	-0.02	0.02	0	0	0	0	0	0
A:361(LEU)	0	0	0	0	0	0	0	0	0
A:362(GLN)	0	0	0	0	0	0	0	0	0
A:363(THR)	0	0	0	0	0	0	0	0	0
A:364(THR)	0	0	0	0	0	0	0	0	0
A:365(ARG)	0	0.03	-0.03	0	0	0	0	0	0
A:366(GLU)	0	-0.02	0.01	0	0	0	0	0	0
A:367(LEU)	0	0	0	0	0	0	0	0	0
A:368(PRO)	0	0	0	0	0	0	0	0	0
A:369(ARG)	0	0.03	-0.03	0	0	0	0	0	0
A:370(LYS)	0	0.01	-0.01	0	0	0	0	0	0
A:371(ASN)	0	0	0	0	0	0	0	0	0
A:372(LEU)	0	0	0	0	0	0	0	0	0
A:373(PRO)	0	0	0	0	0	0	0	0	0
A:374(GLU)	0	-0.02	0.02	0	0	0	0	0	0
A:375(ARG)	0	0.03	-0.03	0	0	0	0	0	0
A:376(LEU)	0	0	0	0	0	0	0	0	0
A:377(LEU)	0	0	0	0	0	0	0	0	0
A:378(ARG)	0	0.03	-0.03	0	0	0	0	0	0
A:379(GLU)	0	-0.03	0.03	0	0	0	0	0	0
A:380(ARG)	0	0.05	-0.05	0	0	0	0	0	0
A:381(ALA)	0	0	0	0	0	0	0	0	0
A:382(ILE)	0	0	0	0	0	0	0	0	0
A:383(PHE)	0	0	0	0	0	0	0	0	0
A:384(LYS)	0	0.04	-0.04	0	0	0	0	0	0
A:385(VAL)	0	0	0	0	0	0	0	0	0
A:386(HIS)	0	0	0	0	0	0	0	0	0
A:387(SER)	0	0	0	0	0	0	0	0	0
A:388(ASP)	0	-0.05	0.05	0	0	0	0	0	0
A:389(PHE)	0	0	0	0	0	0	0	0	0
A:390(THR)	0	0	0	0	0	0	0	0	0
A:391(ALA)	0	0	0	0	0	0	0	0	0
A:392(ALA)	0	0	0	0	0	0	0	0	0
A:393(ALA)	0	0	0	0	0	0	0	0	0
A:394(THR)	0	0	-0.01	0	0	0	0	0	0
A:395(ARG)	0	0.11	-0.11	0	0	0	0	0	0
A:396(GLY)	0	0	0	0	0	0	0	0	0
A:397(ALA)	0	0	0	0	0	0	0	0	0
A:398(MET)	0	0	0	0	0	0	0	0	0
A:399(ALA)	0	0	0	0	0	0	0	0	0
A:400(VAL)	0	0	0	0	0	0	0	0	0
A:401(ILE)	0	0	0	0	0	0	0	0	0
A:402(ASP)	0	-0.06	0.06	0	0	0	0	0	0
A:403(GLY)	0	0	0	0	0	0	0	0	0
A:404(ASN)	0	0	0	0	0	0	0	0	0
A:405(VAL)	0	0	0	0	0	0	0	0	0
A:406(MET)	0	0	0	0	0	0	0	0	0
A:407(ALA)	0	0	0	0	0	0	0	0	0
A:408(ILE)	0	0	0	0	0	0	0	0	0
A:409(ASN)	0	0	0	0	0	0	0	0	0
A:410(PRO)	0	0	0	0	0	0	0	0	0
A:411(SER)	0	0	0	0	0	0	0	0	0
A:412(GLU)	0	-0.02	0.02	0	0	0	0	0	0
A:413(GLU)	0	-0.02	0.02	0	0	0	0	0	0
A:414(THR)	0	0	0	0	0	0	0	0	0
A:415(LYS)	0	0.02	-0.02	0	0	0	0	0	0
A:416(MET)	0	0	0	0	0	0	0	0	0
A:417(GLN)	0	0	0	0	0	0	0	0	0
A:418(MET)	0	0	0	0	0	0	0	0	0
A:419(PHE)	0	0	0	0	0	0	0	0	0
A:420(ILE)	0	0	0	0	0	0	0	0	0
A:421(TRP)	0	0	0	0	0	0	0	0	0
A:422(ASN)	0	0	0	0	0	0	0	0	0
A:423(ASN)	0	0	0	0	0	0	0	0	0
A:424(ILE)	0	0	0	0	0	0	0	0	0
A:425(PHE)	0	0	0	0	0	0	0	0	0
A:426(PHE)	0	0	0	0	0	0	0	0	0
A:427(SER)	0	0	0	0	0	0	0	0	0
A:428(LEU)	0	0	0	0	0	0	0	0	0
A:429(GLY)	0	0	0	0	0	0	0	0	0
A:430(PHE)	0	0	0	0	0	0	0	0	0
A:431(ASP)	0	-0.02	0.02	0	0	0	0	0	0
A:432(VAL)	0	0	0	0	0	0	0	0	0
A:433(ARG)	0	0.02	-0.02	0	0	0	0	0	0
A:434(ASP)	0	-0.02	0.01	0	0	0	0	0	0
A:435(HIS)	0	0	0	0	0	0	0	0	0
A:436(TYR)	0	0	0	0	0	0	0	0	0
A:437(LYS)	0	0.01	-0.01	0	0	0	0	0	0
A:438(ASP)	0	-0.01	0.01	0	0	0	0	0	0
A:439(PHE)	0	0	0	0	0	0	0	0	0
A:440(GLY)	0	0	0	0	0	0	0	0	0
A:441(GLY)	0	0	0	0	0	0	0	0	0
A:442(ASP)	0	-0.02	0.02	0	0	0	0	0	0
A:443(VAL)	0	0	0	0	0	0	0	0	0
A:444(ALA)	0	0	0	0	0	0	0	0	0
A:445(ALA)	0	0	0	0	0	0	0	0	0
A:446(TYR)	0	0	0	0	0	0	0	0	0
A:447(VAL)	0	0	0	0	0	0	0	0	0
A:448(ALA)	0	0	0	0	0	0	0	0	0
A:449(PRO)	0	0	0	0	0	0	0	0	0
A:450(THR)	0	0	0	0	0	0	0	0	0
A:451(ASN)	0	0	0	0	0	0	0	0	0
A:452(ASP)	0	-0.02	0.02	0	0	0	0	0	0
A:453(LEU)	0	0	0	0	0	0	0	0	0
A:454(ASN)	0	0	0	0	0	0	0	0	0
A:455(GLY)	0	0	0	0	0	0	0	0	0
A:456(VAL)	0	0	0	0	0	0	0	0	0
A:457(ARG)	0	0.05	-0.05	0	0	0	0	0	0
A:458(THR)	0	0	0	0	0	0	0	0	0
A:459(TYR)	0	0	0	0	0	0	0	0	0
A:460(ASN)	0	0	0	0	0	0	0	0	0
A:461(ALA)	0	0	0	0	0	0	0	0	0
A:462(VAL)	0	0	0	0	0	0	0	0	0
A:463(ASP)	0	-0.02	0.02	0	0	0	0	0	0
A:464(VAL)	0	0	0	0	0	0	0	0	0
A:465(GLU)	0	-0.02	0.02	0	0	0	0	0	0
A:466(GLY)	0	0	0	0	0	0	0	0	0
A:467(LEU)	0	0	0	0	0	0	0	0	0
A:468(TYR)	0	0	0	0	0	0	0	0	0
A:469(THR)	0	0	0	0	0	0	0	0	0
A:470(LEU)	0	0	0	0	0	0	0	0	0
A:471(GLY)	0	0	0	0	0	0	0	0	0
A:472(THR)	0	0	0	0	0	0	0	0	0
A:473(VAL)	0	0	0	0	0	0	0	0	0
A:474(VAL)	0	0	0	0	0	0	0	0	0
A:475(VAL)	0	0	0	0	0	0	0	0	0
A:476(ASP)	0	-0.05	0.05	0	0	0	0	0	0
A:477(TYR)	0	0	0	0	0	0	0	0	0
A:478(ARG)	0	0.08	-0.08	0	0	0	0	0	0
A:479(GLY)	0	0	0	0	0	0	0	0	0
A:480(TYR)	0	0	0	0	0	0	0	0	0
A:481(ARG)	0	0.06	-0.05	0	0	0	0	0	0
A:482(VAL)	0	0	0	0	0	0	0	0	0
A:483(THR)	0	0	0	0	0	0	0	0	0
A:484(ALA)	0	0	0	0	0	0	0	0	0
A:485(GLN)	0	0	0	0	0	0	0	0	0
A:486(SER)	0	0	0	0	0	0	0	0	0
A:487(ILE)	0	0	0	0	0	0	0	0	0
A:488(ILE)	0	0	0	0	0	0	0	0	0
A:489(PRO)	0	0	0	0	0	0	0	0	0
A:490(GLY)	0	0	0	0	0	0	0	0	0
A:491(ILE)	0	0	0	0	0	0	0	0	0
A:492(LEU)	0	0	0	0	0	0	0	0	0
A:493(GLU)	0	-0.01	0.01	0	0	0	0	0	0
A:494(ARG)	0	0.02	-0.02	0	0	0	0	0	0
A:495(ASP)	0	-0.01	0.01	0	0	0	0	0	0
A:496(GLN)	0	0	0	0	0	0	0	0	0
A:497(GLU)	0	-0.01	0.01	0	0	0	0	0	0
A:498(GLN)	0	0	0	0	0	0	0	0	0
A:499(SER)	0	0	0	0	0	0	0	0	0
A:500(VAL)	0	0	0	0	0	0	0	0	0
A:501(ILE)	0	0	0	0	0	0	0	0	0
A:502(TYR)	0	0	0	0	0	0	0	0	0
A:503(GLY)	0	0	0	0	0	0	0	0	0
A:504(SER)	0	0	0	0	0	0	0	0	0
A:505(ILE)	0	0	0	0	0	0	0	0	0
A:506(ASP)	0	-0.01	0.01	0	0	0	0	0	0
A:507(PHE)	0	0	0	0	0	0	0	0	0
A:508(GLY)	0	0	0	0	0	0	0	0	0
A:509(LYS)	0	0.01	-0.01	0	0	0	0	0	0
A:510(THR)	0	0	0	0	0	0	0	0	0
A:511(VAL)	0	0	0	0	0	0	0	0	0
A:512(VAL)	0	0	0	0	0	0	0	0	0
A:513(SER)	0	0	0	0	0	0	0	0	0
A:514(HIE)	0	0	0	0	0	0	0	0	0
A:515(PRO)	0	0	0	0	0	0	0	0	0
A:516(ARG)	0	0.02	-0.01	0	0	0	0	0	0
A:517(TYR)	0	0	0	0	0	0	0	0	0
A:518(LEU)	0	0	0	0	0	0	0	0	0
A:519(GLU)	0	-0.01	0.01	0	0	0	0	0	0
A:520(LEU)	0	0	0	0	0	0	0	0	0
A:521(LEU)	0	0	0	0	0	0	0	0	0
A:522(GLU)	0	-0.01	0.01	0	0	0	0	0	0
A:523(ARG)	0	0.02	-0.02	0	0	0	0	0	0
A:524(THR)	0	0	0	0	0	0	0	0	0
A:525(SER)	0	0	0	0	0	0	0	0	0
A:526(ARG)	0	0.02	-0.02	0	0	0	0	0	0
A:527(PRO)	0	0	0	0	0	0	0	0	0
A:528(LEU)	0	0	0	0	0	0	0	0	0
A:529(LYS)	0	0.02	-0.02	0	0	0	0	0	0
A:530(ILE)	0	0	0	0	0	0	0	0	0
A:531(LEU)	0	0	0	0	0	0	0	0	0
A:532(ARG)	0	0.02	-0.02	0	0	0	0	0	0
A:533(HIP)	0	0.01	-0.01	0	0	0	0	0	0
A:534(ARG)	0	0.01	-0.01	0	0	0	0	0	0
A:535(VAL)	0	0	0	0	0	0	0	0	0
A:536(LEU)	0	0	0	0	0	0	0	0	0
A:537(ASN)	0	0	0	0	0	0	0	0	0
A:538(ASP)	0	-0.01	0.01	0	0	0	0	0	0
A:539(ARG)	0	0.01	-0.01	0	0	0	0	0	0
A:540(ASP)	0	-0.01	0.01	0	0	0	0	0	0
A:541(GLU)	0	-0.01	0.01	0	0	0	0	0	0
A:542(GLU)	0	-0.01	0.01	0	0	0	0	0	0
A:543(VAL)	0	0	0	0	0	0	0	0	0
A:544(GLU)	0	-0.01	0.01	0	0	0	0	0	0
A:545(LEU)	0	0	0	0	0	0	0	0	0
A:546(CYS)	0	0	0	0	0	0	0	0	0
A:547(SER)	0	0	0	0	0	0	0	0	0
A:548(SER)	0	0	0	0	0	0	0	0	0
A:549(VAL)	0	0	0	0	0	0	0	0	0
A:550(GLU)	0	-0.02	0.02	0	0	0	0	0	0
A:551(CYS)	0	0	0	0	0	0	0	0	0
A:552(LYS)	0	0.02	-0.02	0	0	0	0	0	0
A:553(GLY)	0	0	0	0	0	0	0	0	0
A:554(ILE)	0	0	0	0	0	0	0	0	0
A:555(ILE)	0	0	0	0	0	0	0	0	0
A:556(GLY)	0	0	0	0	0	0	0	0	0
A:557(ASN)	0	0	0	0	0	0	0	0	0
A:558(ASP)	0	-0.01	0.02	0	0	0	0	0	0
A:559(GLY)	0	0	0	0	0	0	0	0	0
A:560(ARG)	0	0.02	-0.02	0	0	0	0	0	0
A:561(HIS)	0	0	0	0	0	0	0	0	0
A:562(TYR)	0	0	0	0	0	0	0	0	0
A:563(ILE)	0	0	0	0	0	0	0	0	0
A:564(LEU)	0	0	0	0	0	0	0	0	0
A:565(ASP)	0	-0.02	0.02	0	0	0	0	0	0
A:566(LEU)	0	0	0	0	0	0	0	0	0
A:567(LEU)	0	0	0	0	0	0	0	0	0
A:568(ARG)	0	0.03	-0.02	0	0	0	0	0	0
A:569(THR)	0	0	0	0	0	0	0	0	0
A:570(PHE)	0	0	0	0	0	0	0	0	0
A:571(PRO)	0	0	0	0	0	0	0	0	0
A:572(PRO)	0	0	0	0	0	0	0	0	0
A:573(ASP)	0	-0.02	0.02	0	0	0	0	0	0
A:574(LEU)	0	0	0	0	0	0	0	0	0
A:575(ASN)	0	0	0	0	0	0	0	0	0
A:576(PHE)	0	0	0	0	0	0	0	0	0
A:577(LEU)	0	0	0	0	0	0	0	0	0
A:578(PRO)	0	0	0	0	0	0	0	0	0
A:579(VAL)	0	0	0	0	0	0	0	0	0
A:580(PRO)	0	0	0	0	0	0	0	0	0
A:581(GLY)	0	0	0	0	0	0	0	0	0
A:582(GLU)	0	-0.01	0.01	0	0	0	0	0	0
A:583(GLU)	0	-0.01	0.01	0	0	0	0	0	0
A:584(LEU)	0	0	0	0	0	0	0	0	0
A:585(PRO)	0	0	0	0	0	0	0	0	0
A:586(GLU)	0	-0.01	0.01	0	0	0	0	0	0
A:587(GLU)	0	-0.01	0.01	0	0	0	0	0	0
A:588(CYS)	0	0	0	0	0	0	0	0	0
A:589(SER)	0	0	0	0	0	0	0	0	0
A:590(ARG)	0	0.02	-0.02	0	0	0	0	0	0
A:591(ALA)	0	0	0	0	0	0	0	0	0
A:592(GLY)	0	0	0	0	0	0	0	0	0
A:593(PHE)	0	0	0	0	0	0	0	0	0
A:594(PRO)	0	0	0	0	0	0	0	0	0
A:595(ARG)	0	0.03	-0.03	0	0	0	0	0	0
A:596(THR)	0	0	0	0	0	0	0	0	0
A:597(HIE)	0	0	0	0	0	0	0	0	0
A:598(ARG)	0	0.03	-0.03	0	0	0	0	0	0
A:599(HIE)	0	0	0	0	0	0	0	0	0
A:600(LYS)	0	0.02	-0.01	0	0	0	0	0	0
A:601(LEU)	0	0	0	0	0	0	0	0	0
A:602(CYS)	0	0	0	0	0	0	0	0	0
A:603(CYS)	0	0	0	0	0	0	0	0	0
A:604(LEU)	0	0	0	0	0	0	0	0	0
A:605(ARG)	0	0.04	-0.04	0	0	0	0	0	0
A:606(GLN)	0	0	0	0	0	0	0	0	0
A:607(GLU)	0	-0.03	0.02	0	0	0	0	0	0
A:608(LEU)	0	0	0	0	0	0	0	0	0
A:609(VAL)	0	0	0	0	0	0	0	0	0
A:610(ASP)	0	-0.02	0.02	0	0	0	0	0	0
A:611(ALA)	0	0	0	0	0	0	0	0	0
A:612(PHE)	0	0	0	0	0	0	0	0	0
A:613(VAL)	0	0	0	0	0	0	0	0	0
A:614(GLU)	0	-0.02	0.02	0	0	0	0	0	0
A:615(HIS)	0	0	0	0	0	0	0	0	0
A:616(ARG)	0	0.02	-0.02	0	0	0	0	0	0
A:617(TYR)	0	0	0	0	0	0	0	0	0
A:618(LEU)	0	0	0	0	0	0	0	0	0
A:619(LEU)	0	0	0	0	0	0	0	0	0
A:620(PHE)	0	0	0	0	0	0	0	0	0
A:621(MET)	0	0	0	0	0	0	0	0	0
A:622(LYS)	0	0.01	-0.01	0	0	0	0	0	0
A:623(LEU)	0	0	0	0	0	0	0	0	0
A:624(ALA)	0	0	0	0	0	0	0	0	0
A:625(ALA)	0	0	0	0	0	0	0	0	0
A:626(LEU)	0	0	0	0	0	0	0	0	0
A:627(GLN)	0	0	0	0	0	0	0	0	0
A:628(LEU)	0	0	0	0	0	0	0	0	0
A:629(MET)	0	0	0	0	0	0	0	0	0
A:630(GLN)	0	0	0	0	0	0	0	0	0
A:631(GLN)	0	0	0	0	0	0	0	0	0
A:632(LYS)	0	0.01	-0.01	0	0	0	0	0	0
A:633(ALA)	0	0	0	0	0	0	0	0	0
A:634(SER)	0	0	0	0	0	0	0	0	0
A:635(LYS)	0	0.01	-0.01	0	0	0	0	0	0
A:636(VAL)	0	0	0	0	0	0	0	0	0
A:637(GLU)	0	-0.01	0.01	0	0	0	0	0	0
A:638(THR)	0	0	0	0	0	0	0	0	0
A:639(THR)	0	0	0	0	0	0	0	0	0
A:640(THR)	0	0	0	0	0	0	0	0	0
A:641(SER)	0	0	0	0	0	0	0	0	0
A:642(LEU)	0	0	0	0	0	0	0	0	0
A:643(GLU)	0	-0.01	0.01	0	0	0	0	0	0
A:644(ASN)	0	0	0	0	0	0	0	0	0
A:645(GLY)	0	0	0	0	0	0	0	0	0
A:646(GLY)	0	0	0	0	0	0	0	0	0
A:647(LEU)	0	0	0	0	0	0	0	0	0
A:648(PRO)	0	0	0	0	0	0	0	0	0
A:649(SER)	0	0	0	0	0	0	0	0	0
A:650(SER)	0	0	0	0	0	0	0	0	0
A:651(ALA)	0	0	0	0	0	0	0	0	0
A:652(GLU)	0	-0.01	0.01	0	0	0	0	0	0
A:653(THR)	0	0	0	0	0	0	0	0	0
A:654(LYS)	0	0.01	-0.01	0	0	0	0	0	0
A:655(SER)	0	0	0	0	0	0	0	0	0
A:656(GLU)	0	-0.01	0.01	0	0	0	0	0	0
A:657(ASP)	0	-0.01	0.01	0	0	0	0	0	0
A:658(SER)	0	0	0	0	0	0	0	0	0
A:659(ILE)	0	0	0	0	0	0	0	0	0
A:660(GLY)	0	0	0	0	0	0	0	0	0
A:661(PRO)	0	0	0	0	0	0	0	0	0
A:662(GLU)	0	-0.01	0.01	0	0	0	0	0	0
A:663(ALA)	0	0	0	0	0	0	0	0	0
A:664(GLY)	0	0	0	0	0	0	0	0	0
A:665(CYS)	0	0	0	0	0	0	0	0	0
A:666(GLU)	0	-0.01	0.01	0	0	0	0	0	0
A:667(GLU)	0	-0.01	0.01	0	0	0	0	0	0
A:668(GLU)	0	-0.01	0.01	0	0	0	0	0	0
A:669(GLY)	0	0	0	0	0	0	0	0	0
A:670(SER)	0	0	0	0	0	0	0	0	0
A:671(SER)	0	0	0	0	0	0	0	0	0
A:672(VAL)	0	0	0	0	0	0	0	0	0
A:673(SER)	0	0	0	0	0	0	0	0	0
A:674(GLY)	0	0	0	0	0	0	0	0	0
A:675(LEU)	0	0	0	0	0	0	0	0	0
A:676(ALA)	0	0	0	0	0	0	0	0	0
A:677(LYS)	0	0.01	-0.01	0	0	0	0	0	0
A:678(VAL)	0	0	0	0	0	0	0	0	0
A:679(LYS)	0	0.01	-0.01	0	0	0	0	0	0
A:680(GLU)	0	-0.01	0.01	0	0	0	0	0	0
A:681(LEU)	0	0	0	0	0	0	0	0	0
A:682(ALA)	0	0	0	0	0	0	0	0	0
A:683(GLU)	0	-0.01	0.01	0	0	0	0	0	0
A:684(THR)	0	0	0	0	0	0	0	0	0
A:685(ILE)	0	0	0	0	0	0	0	0	0
A:686(ALA)	0	0	0	0	0	0	0	0	0
A:687(SER)	0	0	0	0	0	0	0	0	0
A:688(ASP)	0	-0.01	0.01	0	0	0	0	0	0
A:689(ASP)	0	-0.01	0.01	0	0	0	0	0	0
A:690(GLY)	0	0	0	0	0	0	0	0	0
A:691(THR)	0	0	0	0	0	0	0	0	0
A:692(VAL)	0	0	0	0	0	0	0	0	0
A:693(ASP)	0	-0.01	0.01	0	0	0	0	0	0
A:694(PRO)	0	0	0	0	0	0	0	0	0
A:695(ARG)	0	0.01	-0.01	0	0	0	0	0	0
A:696(SER)	0	0	0	0	0	0	0	0	0
A:697(ARG)	0	0.01	-0.01	0	0	0	0	0	0
A:698(GLU)	0	-0.01	0.01	0	0	0	0	0	0
A:699(VAL)	0	0	0	0	0	0	0	0	0
A:700(ILE)	0	0	0	0	0	0	0	0	0
A:701(ARG)	0	0.01	-0.01	0	0	0	0	0	0
A:702(ASN)	0	0	0	0	0	0	0	0	0
A:703(ALA)	0	0	0	0	0	0	0	0	0
A:704(CYS)	0	0	0	0	0	0	0	0	0
A:705(LYS)	0	0.01	-0.01	0	0	0	0	0	0
A:706(ALA)	0	0	0	0	0	0	0	0	0
A:707(VAL)	0	0	0	0	0	0	0	0	0
A:708(GLY)	0	0	0	0	0	0	0	0	0
A:709(SER)	0	0	0	0	0	0	0	0	0
A:710(ILE)	0	0	0	0	0	0	0	0	0
A:711(SER)	0	0	0	0	0	0	0	0	0
A:712(SER)	0	0	0	0	0	0	0	0	0
A:713(THR)	0	0	0	0	0	0	0	0	0
A:714(ALA)	0	0	0	0	0	0	0	0	0
A:715(PHE)	0	0	0	0	0	0	0	0	0
A:716(ASP)	0	-0.01	0.01	0	0	0	0	0	0
A:717(ILE)	0	0	0	0	0	0	0	0	0
A:718(ARG)	0	0.02	-0.02	0	0	0	0	0	0
A:719(PHE)	0	0	0	0	0	0	0	0	0
A:720(ASN)	0	0	0	0	0	0	0	0	0
A:721(PRO)	0	0	0	0	0	0	0	0	0
A:722(ASP)	0	-0.01	0.01	0	0	0	0	0	0
A:723(ILE)	0	0	0	0	0	0	0	0	0
A:724(PHE)	0	0	0	0	0	0	0	0	0
A:725(SER)	0	0	0	0	0	0	0	0	0
A:726(PRO)	0	0	0	0	0	0	0	0	0
A:727(GLY)	0	0	0	0	0	0	0	0	0
A:728(VAL)	0	0	0	0	0	0	0	0	0
A:729(ARG)	0	0.01	-0.01	0	0	0	0	0	0
A:730(PHE)	0	0	0	0	0	0	0	0	0
A:731(PRO)	0	0	0	0	0	0	0	0	0
A:732(GLU)	0	-0.01	0.01	0	0	0	0	0	0
A:733(SER)	0	0	0	0	0	0	0	0	0
A:734(CYS)	0	0	0	0	0	0	0	0	0
A:735(GLN)	0	0	0	0	0	0	0	0	0
A:736(ASP)	0	-0.01	0.01	0	0	0	0	0	0
A:737(GLU)	0	-0.01	0.01	0	0	0	0	0	0
A:738(VAL)	0	0	0	0	0	0	0	0	0
A:739(ARG)	0	0.01	-0.01	0	0	0	0	0	0
A:740(ASP)	0	-0.01	0.01	0	0	0	0	0	0
A:741(GLN)	0	0	0	0	0	0	0	0	0
A:742(LYS)	0	0.01	-0.01	0	0	0	0	0	0
A:743(GLN)	0	0	0	0	0	0	0	0	0
A:744(LEU)	0	0	0	0	0	0	0	0	0
A:745(LEU)	0	0	0	0	0	0	0	0	0
A:746(LYS)	0	0.01	-0.01	0	0	0	0	0	0
A:747(ASP)	0	-0.01	0.01	0	0	0	0	0	0
A:748(ALA)	0	0	0	0	0	0	0	0	0
A:749(ALA)	0	0	0	0	0	0	0	0	0
A:750(ALA)	0	0	0	0	0	0	0	0	0
A:751(PHE)	0	0	0	0	0	0	0	0	0
A:752(LEU)	0	0	0	0	0	0	0	0	0
A:753(LEU)	0	0	0	0	0	0	0	0	0
A:754(SER)	0	0	0	0	0	0	0	0	0
A:755(CYS)	0	0	0	0	0	0	0	0	0
A:756(GLN)	0	0	0	0	0	0	0	0	0
A:757(ILE)	0	0	0	0	0	0	0	0	0
A:758(PRO)	0	0	0	0	0	0	0	0	0
A:759(GLY)	0	0	0	0	0	0	0	0	0
A:760(LEU)	0	0	0	0	0	0	0	0	0
A:761(VAL)	0	0	0	0	0	0	0	0	0
A:762(LYS)	0	0.02	-0.02	0	0	0	0	0	0
A:763(ASP)	0	-0.02	0.02	0	0	0	0	0	0
A:764(CYS)	0	0	0	0	0	0	0	0	0
A:765(THR)	0	0	0	0	0	0	0	0	0
A:766(GLU)	0	-0.02	0.02	0	0	0	0	0	0
A:767(TYR)	0	0	0	0	0	0	0	0	0
A:768(ALA)	0	0	0	0	0	0	0	0	0
A:769(VAL)	0	0	0	0	0	0	0	0	0
A:770(LEU)	0	0	0	0	0	0	0	0	0
A:771(PRO)	0	0	0	0	0	0	0	0	0
A:772(MET)	0	0	0	0	0	0	0	0	0
A:773(ASP)	0	-0.05	0.05	0	0	0	0	0	0
A:774(GLY)	0	0	0	0	0	0	0	0	0
A:775(ALA)	0	0	0	0	0	0	0	0	0
A:776(THR)	0	0	0	0	0	0	0	0	0
A:777(LEU)	0	0	0	0	0	0	0	0	0
A:778(ALA)	0	0	0	0	0	0	0	0	0
A:779(GLU)	0	-0.04	0.03	0	0	0	0	0	0
A:780(VAL)	0	0	0	0	0	0	0	0	0
A:781(MET)	0	0	0	0	0	0	0	0	0
A:782(ARG)	0	0.05	-0.05	0	0	0	0	0	0
A:783(GLN)	0	0	0	0	0	0	0	0	0
A:784(ARG)	0	0.03	-0.03	0	0	0	0	0	0
A:785(GLY)	0	0	0	0	0	0	0	0	0
A:786(ILE)	0	0	0	0	0	0	0	0	0
A:787(ASN)	0	0	0	0	0	0	0	0	0
A:788(MET)	0	0	0	0	0	0	0	0	0
A:789(ARG)	0	0.03	-0.03	0	0	0	0	0	0
A:790(TYR)	0	0	0	0	0	0	0	0	0
A:791(LEU)	0	0	0	0	0	0	0	0	0
A:792(GLY)	0	0	0	0	0	0	0	0	0
A:793(LYS)	0	0.02	-0.02	0	0	0	0	0	0
A:794(VAL)	0	0	0	0	0	0	0	0	0
A:795(LEU)	0	0	0	0	0	0	0	0	0
A:796(ASP)	0	-0.02	0.02	0	0	0	0	0	0
A:797(LEU)	0	0	0	0	0	0	0	0	0
A:798(VAL)	0	0	0	0	0	0	0	0	0
A:799(LEU)	0	0	0	0	0	0	0	0	0
A:800(ARG)	0	0.02	-0.02	0	0	0	0	0	0
A:801(SER)	0	0	0	0	0	0	0	0	0
A:802(PRO)	0	0	0	0	0	0	0	0	0
A:803(ALA)	0	0	0	0	0	0	0	0	0
A:804(ARG)	0	0.02	-0.02	0	0	0	0	0	0
A:805(ASP)	0	-0.02	0.02	0	0	0	0	0	0
A:806(GLN)	0	0	0	0	0	0	0	0	0
A:807(LEU)	0	0	0	0	0	0	0	0	0
A:808(ASP)	0	-0.02	0.02	0	0	0	0	0	0
A:809(HIE)	0	0	0	0	0	0	0	0	0
A:810(ILE)	0	0	0	0	0	0	0	0	0
A:811(TYR)	0	0	0	0	0	0	0	0	0
A:812(LYS)	0	0.02	-0.02	0	0	0	0	0	0
A:813(ILE)	0	0	0	0	0	0	0	0	0
A:814(GLY)	0	0	0	0	0	0	0	0	0
A:815(ILE)	0	0	0	0	0	0	0	0	0
A:816(GLY)	0	0	0	0	0	0	0	0	0
A:817(GLU)	0	-0.04	0.04	0	0	0	0	0	0
A:818(LEU)	0	0	0	0	0	0	0	0	0
A:819(ILE)	0	0	0	0	0	0	0	0	0
A:820(THR)	0	0	0	0	0	0	0	0	0
A:821(ARG)	0	0.05	-0.05	0	0	0	0	0	0
A:822(SER)	0	0	0	0	0	0	0	0	0
A:823(ALA)	0	0	0	0	0	0	0	0	0
A:824(LYS)	0	0.04	-0.04	0	0	0	0	0	0
A:825(HIS)	0	0	0	0	0	0	0	0	0
A:826(ILE)	0	0	0	0	0	0	0	0	0
A:827(PHE)	0	0	0	0	0	0	0	0	0
A:828(LYS)	0	0.03	-0.03	0	0	0	0	0	0
A:829(THR)	0	0	0	0	0	0	0	0	0
A:830(TYR)	0	0	0	0	0	0	0	0	0
A:831(LEU)	0	0	0	0	0	0	0	0	0
A:832(GLN)	0	0	0	0	0	0	0	0	0
A:833(GLY)	0	0	0	0	0	0	0	0	0
A:834(VAL)	0	0	0	0	0	0	0	0	0
A:835(GLU)	0	-0.03	0.03	0	0	0	0	0	0
A:836(LEU)	0	0	0	0	0	0	0	0	0
A:837(SER)	0	0	0	0	0	0	0	0	0
A:838(GLY)	0	0	0	0	0	0	0	0	0
A:839(LEU)	0	0	0	0	0	0	0	0	0
A:840(SER)	0	0.01	-0.01	0	0	0	0	0	0
A:841(ALA)	0	0	0	0	0	0	0	0	0
A:842(ALA)	0	0	0	0	0	0	0	0	0
A:843(ILE)	0	0	0	0	0	0	0	0	0
A:844(SER)	0	0	0	0	0	0	0	0	0
A:845(HIE)	0	0	0	0	0	0	0	0	0
A:846(PHE)	0	0	0	0	0	0	0	0	0
A:847(LEU)	0	0	0	0	0	0	0	0	0
A:848(ASN)	0	0	0	0	0	0	0	0	0
A:849(CYS)	0	0	0	0	0	0	0	0	0
A:850(PHE)	0	0	0	0	0	0	0	0	0
A:851(LEU)	0	0	0	0	0	0	0	0	0
A:852(SER)	0	0	0	0	0	0	0	0	0
A:853(SER)	0	0	0	0	0	0	0	0	0
A:854(TYR)	0	0	0	0	0	0	0	0	0
A:855(PRO)	0	0	0	0	0	0	0	0	0
A:856(ASN)	0	0	0	0	0	0	0	0	0
A:857(PRO)	0	0	0	0	0	0	0	0	0
A:858(VAL)	0	0	0	0	0	0	0	0	0
A:859(ALA)	0	0	0	0	0	0	0	0	0
A:860(HIS)	0	0	0	0	0	0	0	0	0
A:861(LEU)	0	0	0	0	0	0	0	0	0
A:862(PRO)	0	0	0	0	0	0	0	0	0
A:863(ALA)	0	0	0	0	0	0	0	0	0
A:864(ASP)	0	-0.02	0.02	0	0	0	0	0	0
A:865(GLU)	0	-0.02	0.02	0	0	0	0	0	0
A:866(LEU)	0	0	0	0	0	0	0	0	0
A:867(LEU)	0	0	0	0	0	0	0	0	0
A:868(SER)	0	0	0	0	0	0	0	0	0
A:869(LYS)	0	0.04	-0.03	0	0	0	0	0	0
A:870(LYS)	0.01	0.1	-0.08	0	0	0	0	0	0
A:871(ARG)	0	0.07	-0.07	0	0	0	0	0	0
A:872(ASN)	0	0	0	0	0	0	0	0	0
A:873(LYS)	0.01	0.06	-0.06	0	0	0	0	0	0
A:874(ARG)	0	0.11	-0.1	0	0	0	0	0	0
A:875(ARG)	0	0.04	-0.04	0	0	0	0	0	0
A:876(LYS)	0	0.03	-0.03	0	0	0	0	0	0
A:877(ASN)	0	0	0	0	0	0	0	0	0
A:878(ARG)	0	0.04	-0.04	0	0	0	0	0	0
A:879(PRO)	0	0	0	0	0	0	0	0	0
A:880(PRO)	0	0	0	0	0	0	0	0	0
A:881(GLY)	0	0	0	0	0	0	0	0	0
A:882(ALA)	0	0	0	0	0	0	0	0	0
A:883(ALA)	0	0	0	0	0	0	0	0	0
A:884(ASP)	0	-0.02	0.02	0	0	0	0	0	0
A:885(ASN)	0	0	0	0	0	0	0	0	0
A:886(THR)	0	0	0	0	0	0	0	0	0
A:887(ALA)	0	0	0	0	0	0	0	0	0
A:888(TRP)	0	0	0	0	0	0	0	0	0
A:889(ALA)	0	0	0	0	0	0	0	0	0
A:890(VAL)	0	0	0	0	0	0	0	0	0
A:891(MET)	0	0	0	0	0	0	0	0	0
A:892(THR)	0	0	0	0	0	0	0	0	0
A:893(PRO)	0	0	0	0	0	0	0	0	0
A:894(GLN)	0	0	0	0	0	0	0	0	0
A:895(GLU)	0	-0.02	0.02	0	0	0	0	0	0
A:896(LEU)	0	0	0	0	0	0	0	0	0
A:897(TRP)	0	0	0	0	0	0	0	0	0
A:898(LYS)	0	0.02	-0.02	0	0	0	0	0	0
A:899(ASN)	0	0	0	0	0	0	0	0	0
A:900(ILE)	0	0	0	0	0	0	0	0	0
A:901(CYS)	0	0	0	0	0	0	0	0	0
A:902(HIS)	0	0	0	0	0	0	0	0	0
A:903(GLU)	0	-0.03	0.02	0	0	0	0	0	0
A:904(ALA)	0	0	0	0	0	0	0	0	0
A:905(LYS)	0	0.02	-0.02	0	0	0	0	0	0
A:906(ASN)	0	0	0	0	0	0	0	0	0
A:907(TYR)	0	0	0	0	0	0	0	0	0
A:908(PHE)	0	0	0	0	0	0	0	0	0
A:909(ASP)	0	-0.02	0.02	0	0	0	0	0	0
A:910(PHE)	0	0	0	0	0	0	0	0	0
A:911(THR)	0	0	0	0	0	0	0	0	0
A:912(LEU)	0	0	0	0	0	0	0	0	0
A:913(GLU)	0	-0.02	0.02	0	0	0	0	0	0
A:914(CYS)	0	0	0	0	0	0	0	0	0
A:915(ASP)	0	-0.02	0.02	0	0	0	0	0	0
A:916(SER)	0	0	0	0	0	0	0	0	0
A:917(VAL)	0	0	0	0	0	0	0	0	0
A:918(ASP)	0	-0.03	0.03	0	0	0	0	0	0
A:919(GLN)	0	0	0	0	0	0	0	0	0
A:920(ALA)	0	0	0	0	0	0	0	0	0
A:921(VAL)	0	0	0	0	0	0	0	0	0
A:922(GLU)	0	-0.02	0.02	0	0	0	0	0	0
A:923(THR)	0	0	0	0	0	0	0	0	0
A:924(TYR)	0	0	0	0	0	0	0	0	0
A:925(GLY)	0	0	0	0	0	0	0	0	0
A:926(LEU)	0	0	0	0	0	0	0	0	0
A:927(GLN)	0	0	0	0	0	0	0	0	0
A:928(LYS)	0	0.03	-0.03	0	0	0	0	0	0
A:929(ILE)	0	0	0	0	0	0	0	0	0
A:930(THR)	0	0	0	0	0	0	0	0	0
A:931(LEU)	0	0	0	0	0	0	0	0	0
A:932(LEU)	0	0	0	0	0	0	0	0	0
A:933(ARG)	0	0.09	-0.08	0	0	0	0	0	0
A:934(GLU)	0	-0.05	0.05	0	0	0	0	0	0
A:935(ILE)	0	0	0	0	0	0	0	0	0
A:936(SER)	0	0	0	0	0	0	0	0	0
A:937(LEU)	0	0	0	0	0	0	0	0	0
A:938(LYS)	0	0.04	-0.04	0	0	0	0	0	0
A:939(THR)	0	0	0	0	0	0	0	0	0
A:940(GLY)	0	0	0.01	0	0	0	0	0	0
A:941(ILE)	0	0	0	0	0	0	0	0	0
A:942(GLN)	0.01	0	0.01	0	0	0	0	0	0
A:943(ILE)	0.01	-0.01	0.02	0	0	0	0	0	0
A:944(LEU)	-0.01	0.01	-0.02	0	0	0	0	0	0
A:945(LEU)	0.01	0	0.01	0	0	0	0	0	0
A:946(LYS)	0.01	0.05	-0.05	0	0	0	0	0	0
A:947(GLU)	0	-0.05	0.05	0	0	0	0	0	0
A:948(TYR)	0	0	0	0	0	0	0	0	0
A:949(SER)	0	0	0	0	0	0	0	0	0
A:950(PHE)	0	0	0	0	0	0	0	0	0
A:951(ASP)	0	-0.03	0.03	0	0	0	0	0	0
A:952(SER)	0	0	0	0	0	0	0	0	0
A:953(ARG)	0	0.03	-0.03	0	0	0	0	0	0
A:954(HIS)	0	0	0	0	0	0	0	0	0
A:955(LYS)	0	0.03	-0.03	0	0	0	0	0	0
A:956(PRO)	0	0	0	0	0	0	0	0	0
A:957(ALA)	0	0	0	0	0	0	0	0	0
A:958(PHE)	0	0	0	0	0	0	0	0	0
A:959(THR)	0	0	0	0	0	0	0	0	0
A:960(GLU)	0	-0.04	0.04	0	0	0	0	0	0
A:961(GLU)	0.01	-0.07	0.08	0	0	0	0	0	0
A:962(ASP)	0	-0.07	0.07	0	0	0	0	0	0
A:963(VAL)	-0.01	0	0	0	0	0	0	0	0
A:964(LEU)	0.01	0	0	0	0	0	0	0	0
A:965(ASN)	0.01	0.01	0	0	0	0	0	0	0
A:966(ILE)	0	0	0	0	0	0	0	0	0
A:967(PHE)	0.02	0.01	0.01	0	0	0	0	0	0
A:968(PRO)	0	-0.01	0.01	0	0	0	0	0	0
A:969(VAL)	0	0	0	0	0	0	0	0	0
A:970(VAL)	0	0	0	0	0	0	0	0	0
A:971(LYS)	0	0.04	-0.04	0	0	0	0	0	0
A:972(HIS)	0	0	0.01	0	0	0	0	0	0
A:973(VAL)	0	0	0	0	0	0	0	0	0
A:974(ASN)	0	0	0	0	0	0	0	0	0
A:975(PRO)	0	0	0	0	0	0	0	0	0
A:976(LYS)	0	0.03	-0.03	0	0	0	0	0	0
A:977(ALA)	0	0	0	0	0	0	0	0	0
A:978(SER)	0	0	0	0	0	0	0	0	0
A:979(ASP)	0	-0.02	0.02	0	0	0	0	0	0
A:980(ALA)	0	0	0	0	0	0	0	0	0
A:981(PHE)	0	0	0	0	0	0	0	0	0
A:982(HIE)	0	0	0	0	0	0	0	0	0
A:983(PHE)	0	0	0	0	0	0	0	0	0
A:984(PHE)	0	0	0	0	0	0	0	0	0
A:985(GLN)	0	0	0	0	0	0	0	0	0
A:986(SER)	0	0	0	0	0	0	0	0	0
A:987(GLY)	0	0	0	0	0	0	0	0	0
A:988(GLN)	0	0	0	0	0	0	0	0	0
A:989(ALA)	0	0	0	0	0	0	0	0	0
A:990(LYS)	0	0.02	-0.02	0	0	0	0	0	0
A:991(VAL)	0	0	0	0	0	0	0	0	0
A:992(GLN)	0	0	0	0	0	0	0	0	0
A:993(GLN)	0	0	0	0	0	0	0	0	0
A:994(GLY)	0	0	0	0	0	0	0	0	0
A:995(PHE)	0	0	0	0	0	0	0	0	0
A:996(LEU)	0	0	0	0	0	0	0	0	0
A:997(LYS)	0	0.01	-0.01	0	0	0	0	0	0
A:998(GLU)	0	-0.02	0.01	0	0	0	0	0	0
A:999(GLY)	0	0	0	0	0	0	0	0	0
A:1000(CYS)	0	0	0	0	0	0	0	0	0
A:1001(GLU)	0	-0.02	0.02	0	0	0	0	0	0
A:1002(LEU)	0	0	0	0	0	0	0	0	0
A:1003(ILE)	0	0	0	0	0	0	0	0	0
A:1004(ASN)	0	0	0	0	0	0	0	0	0
A:1005(GLU)	0	-0.02	0.02	0	0	0	0	0	0
A:1006(ALA)	0	0	0	0	0	0	0	0	0
A:1007(LEU)	0	0	0	0	0	0	0	0	0
A:1008(ASN)	0	0	0	0	0	0	0	0	0
A:1009(LEU)	0	0	0	0	0	0	0	0	0
A:1010(PHE)	0	0	0	0	0	0	0	0	0
A:1011(ASN)	0	0	0	0	0	0	0	0	0
A:1012(ASN)	0	0	0	0	0	0	0	0	0
A:1013(VAL)	0	0	0	0	0	0	0	0	0
A:1014(TYR)	0	0	0	0	0	0	0	0	0
A:1015(GLY)	0	0	0	0	0	0	0	0	0
A:1016(ALA)	0	0	0	0	0	0	0	0	0
A:1017(MET)	0	0	0	0	0	0	0	0	0
A:1018(HIE)	0	0	0	0	0	0	0	0	0
A:1019(VAL)	0	0	0	0	0	0	0	0	0
A:1020(GLU)	0	-0.04	0.04	0	0	0	0	0	0
A:1021(ILE)	0	0	0	0	0	0	0	0	0
A:1022(CYS)	0	0	0	0	0	0	0	0	0
A:1023(ALA)	0	0	0	0	0	0	0	0	0
A:1024(CYS)	0	0	0	0	0	0	0	0	0
A:1025(LEU)	0	0	0	0	0	0	0	0	0
A:1026(ARG)	0	0.06	-0.06	0	0	0	0	0	0
A:1027(LEU)	0	0	0	0	0	0	0	0	0
A:1028(LEU)	0	0	0	0	0	0	0	0	0
A:1029(ALA)	0	0	0	0	0	0	0	0	0
A:1030(ARG)	0	0.04	-0.04	0	0	0	0	0	0
A:1031(LEU)	0	0	0	0	0	0	0	0	0
A:1032(HIE)	0	0.01	0	0	0	0	0	0	0
A:1033(TYR)	0	0	0	0	0	0	0	0	0
A:1034(ILE)	0	0	0	0	0	0	0	0	0
A:1035(MET)	0	0	0	0	0	0	0	0	0
A:1036(GLY)	0	0	0	0	0	0	0	0	0
A:1037(ASP)	0	-0.02	0.02	0	0	0	0	0	0
A:1038(TYR)	0	0	0	0	0	0	0	0	0
A:1039(ALA)	0	0	0	0	0	0	0	0	0
A:1040(GLU)	0	-0.03	0.03	0	0	0	0	0	0
A:1041(ALA)	0	0	0	0	0	0	0	0	0
A:1042(LEU)	0	0	0	0	0	0	0	0	0
A:1043(SER)	0	0	0	0	0	0	0	0	0
A:1044(ASN)	0	-0.01	0.01	0	0	0	0	0	0
A:1045(GLN)	0	0	0	0	0	0	0	0	0
A:1046(GLN)	0	0	0	0	0	0	0	0	0
A:1047(LYS)	0	0.05	-0.05	0	0	0	0	0	0
A:1048(ALA)	0	-0.01	0.01	0	0	0	0	0	0
A:1049(VAL)	0	0	0	0	0	0	0	0	0
A:1050(LEU)	0	-0.01	0.01	0	0	0	0	0	0
A:1051(MET)	0	-0.01	0.01	0	0	0	0	0	0
A:1052(SER)	0	0	0	0	0	0	0	0	0
A:1053(GLU)	0.01	-0.11	0.12	0	0	0	0	0	0
A:1054(ARG)	0	0.21	-0.21	0	0	0	0	0	0
A:1055(VAL)	0	0	0	0	0	0	0	0	0
A:1056(MET)	0	0	0	0	0	0	0	0	0
A:1057(GLY)	0	0.01	-0.01	0	0	0	0	0	0
A:1058(ILE)	0	0.01	-0.01	0	0	0	0	0	0
A:1059(GLU)	0	-0.08	0.08	0	0	0	0	0	0
A:1060(HIE)	0	0	0	0	0	0	0	0	0
A:1061(PRO)	0	0	0	0	0	0	0	0	0
A:1062(ASN)	0	0	0	0	0	0	0	0	0
A:1063(THR)	0	0.01	-0.01	0	0	0	0	0	0
A:1064(ILE)	0	0	0	0	0	0	0	0	0
A:1065(GLN)	0	0	0	0	0	0	0	0	0
A:1066(GLU)	0	-0.05	0.04	0	0	0	0	0	0
A:1067(TYR)	0	0	0	0	0	0	0	0	0
A:1068(MET)	0	0	0	0	0	0	0	0	0
A:1069(HIS)	0	0	-0.01	0	0	0	0	0	0
A:1070(LEU)	0	0	0	0	0	0	0	0	0
A:1071(ALA)	0	0	0	0	0	0	0	0	0
A:1072(LEU)	0	0	0	0	0	0	0	0	0
A:1073(TYR)	0	0	0	0	0	0	0	0	0
A:1074(CYS)	0	0	0	0	0	0	0	0	0
A:1075(PHE)	0	0	0	0	0	0	0	0	0
A:1076(ALA)	0	0	0	0	0	0	0	0	0
A:1077(SER)	0	0	0	0	0	0	0	0	0
A:1078(SER)	0	0	0	0	0	0	0	0	0
A:1079(GLN)	0	0	0	0	0	0	0	0	0
A:1080(LEU)	0	0	0	0	0	0	0	0	0
A:1081(SER)	0	0	0	0	0	0	0	0	0
A:1082(THR)	0	0	0	0	0	0	0	0	0
A:1083(ALA)	0	0	0	0	0	0	0	0	0
A:1084(LEU)	0	0	0	0	0	0	0	0	0
A:1085(SER)	0	0	0	0	0	0	0	0	0
A:1086(LEU)	0	0	0	0	0	0	0	0	0
A:1087(LEU)	0	0	0	0	0	0	0	0	0
A:1088(TYR)	0	0	0	0	0	0	0	0	0
A:1089(ARG)	0	0.12	-0.12	0	0	0	0	0	0
A:1090(ALA)	0	0	0	0	0	0	0	0	0
A:1091(ARG)	0	0.04	-0.04	0	0	0	0	0	0
A:1092(TYR)	0	0	0	0	0	0	0	0	0
A:1093(LEU)	0	0	0	0	0	0	0	0	0
A:1094(MET)	0	0	0	0	0	0	0	0	0
A:1095(LEU)	0	0	0	0	0	0	0	0	0
A:1096(LEU)	0	0	0	0	0	0	0	0	0
A:1097(VAL)	0	0	0	0	0	0	0	0	0
A:1098(PHE)	0	0	0	0	0	0	0	0	0
A:1099(GLY)	0	0	0	0	0	0	0	0	0
A:1100(GLU)	0	-0.03	0.03	0	0	0	0	0	0
A:1101(ASP)	0	-0.03	0.02	0	0	0	0	0	0
A:1102(HIE)	0	0	0	0	0	0	0	0	0
A:1103(PRO)	0	0	0	0	0	0	0	0	0
A:1104(GLU)	0	-0.03	0.03	0	0	0	0	0	0
A:1105(MET)	0	0	0	0	0	0	0	0	0
A:1106(ALA)	0	0	0	0	0	0	0	0	0
A:1107(LEU)	0	0	0	0	0	0	0	0	0
A:1108(LEU)	0	0	0	0	0	0	0	0	0
A:1109(ASP)	0	-0.03	0.03	0	0	0	0	0	0
A:1110(ASN)	0	0	0	0	0	0	0	0	0
A:1111(ASN)	0	0	0	0	0	0	0	0	0
A:1112(ILE)	0	0	0	0	0	0	0	0	0
A:1113(GLY)	0	0	0	0	0	0	0	0	0
A:1114(LEU)	0	0	0	0	0	0	0	0	0
A:1115(VAL)	0	0	0	0	0	0	0	0	0
A:1116(LEU)	0	0	0	0	0	0	0	0	0
A:1117(HIE)	0	0	0	0	0	0	0	0	0
A:1118(GLY)	0	0	0	0	0	0	0	0	0
A:1119(VAL)	0	0	0	0	0	0	0	0	0
A:1120(MET)	0	0	0	0	0	0	0	0	0
A:1121(GLU)	0	-0.02	0.02	0	0	0	0	0	0
A:1122(TYR)	0	0	0	0	0	0	0	0	0
A:1123(ASP)	0	-0.01	0.01	0	0	0	0	0	0
A:1124(LEU)	0	0	0	0	0	0	0	0	0
A:1125(SER)	0	0	0	0	0	0	0	0	0
A:1126(LEU)	0	0	0	0	0	0	0	0	0
A:1127(ARG)	0	0.02	-0.02	0	0	0	0	0	0
A:1128(PHE)	0	0	0	0	0	0	0	0	0
A:1129(LEU)	0	0	0	0	0	0	0	0	0
A:1130(GLU)	0	-0.02	0.01	0	0	0	0	0	0
A:1131(ASN)	0	0	0	0	0	0	0	0	0
A:1132(ALA)	0	0	0	0	0	0	0	0	0
A:1133(LEU)	0	0	0	0	0	0	0	0	0
A:1134(ALA)	0	0	0	0	0	0	0	0	0
A:1135(VAL)	0	0	0	0	0	0	0	0	0
A:1136(THR)	0	0	0	0	0	0	0	0	0
A:1137(THR)	0	0	0	0	0	0	0	0	0
A:1138(LYS)	0	0.02	-0.02	0	0	0	0	0	0
A:1139(TYR)	0	0	0	0	0	0	0	0	0
A:1140(HIS)	0	0	0	0	0	0	0	0	0
A:1141(GLY)	0	0	0	0	0	0	0	0	0
A:1142(PRO)	0	0	0	0	0	0	0	0	0
A:1143(LYS)	0	0.01	-0.01	0	0	0	0	0	0
A:1144(ALA)	0	0	0	0	0	0	0	0	0
A:1145(LEU)	0	0	0	0	0	0	0	0	0
A:1146(LYS)	0	0.02	-0.02	0	0	0	0	0	0
A:1147(VAL)	0	0	0	0	0	0	0	0	0
A:1148(ALA)	0	0	0	0	0	0	0	0	0
A:1149(LEU)	0	0	0	0	0	0	0	0	0
A:1150(SER)	0	0	0	0	0	0	0	0	0
A:1151(HIS)	0	0	0	0	0	0	0	0	0
A:1152(HIS)	0	0	0	0	0	0	0	0	0
A:1153(LEU)	0	0	0	0	0	0	0	0	0
A:1154(VAL)	0	0	0	0	0	0	0	0	0
A:1155(ALA)	0	0	0	0	0	0	0	0	0
A:1156(ARG)	0	0.02	-0.02	0	0	0	0	0	0
A:1157(VAL)	0	0	0	0	0	0	0	0	0
A:1158(TYR)	0	0	0	0	0	0	0	0	0
A:1159(GLU)	0	-0.01	0.01	0	0	0	0	0	0
A:1160(SER)	0	0	0	0	0	0	0	0	0
A:1161(LYS)	0	0.01	-0.01	0	0	0	0	0	0
A:1162(ALA)	0	0	0	0	0	0	0	0	0
A:1163(GLU)	0	-0.01	0.01	0	0	0	0	0	0
A:1164(PHE)	0	0	0	0	0	0	0	0	0
A:1165(ARG)	0	0.01	-0.01	0	0	0	0	0	0
A:1166(SER)	0	0	0	0	0	0	0	0	0
A:1167(ALA)	0	0	0	0	0	0	0	0	0
A:1168(LEU)	0	0	0	0	0	0	0	0	0
A:1169(GLN)	0	0	0	0	0	0	0	0	0
A:1170(HIE)	0	0	0	0	0	0	0	0	0
A:1171(GLU)	0	-0.01	0.01	0	0	0	0	0	0
A:1172(LYS)	0	0.01	-0.01	0	0	0	0	0	0
A:1173(GLU)	0	-0.01	0.01	0	0	0	0	0	0
A:1174(GLY)	0	0	0	0	0	0	0	0	0
A:1175(TYR)	0	0	0	0	0	0	0	0	0
A:1176(THR)	0	0	0	0	0	0	0	0	0
A:1177(ILE)	0	0	0	0	0	0	0	0	0
A:1178(TYR)	0	0	0	0	0	0	0	0	0
A:1179(LYS)	0	0.01	-0.01	0	0	0	0	0	0
A:1180(THR)	0	0	0	0	0	0	0	0	0
A:1181(GLN)	0	0	0	0	0	0	0	0	0
A:1182(LEU)	0	0	0	0	0	0	0	0	0
A:1183(GLY)	0	0	0	0	0	0	0	0	0
A:1184(GLU)	0	-0.01	0.01	0	0	0	0	0	0
A:1185(ASP)	0	-0.01	0.01	0	0	0	0	0	0
A:1186(HIE)	0	0	0	0	0	0	0	0	0
A:1187(GLU)	0	-0.01	0.01	0	0	0	0	0	0
A:1188(LYS)	0	0.01	-0.01	0	0	0	0	0	0
A:1189(THR)	0	0	0	0	0	0	0	0	0
A:1190(LYS)	0	0.01	-0.01	0	0	0	0	0	0
A:1191(GLU)	0	-0.01	0.01	0	0	0	0	0	0
A:1192(SER)	0	0	0	0	0	0	0	0	0
A:1193(SER)	0	0	0	0	0	0	0	0	0
A:1194(GLU)	0	-0.01	0.01	0	0	0	0	0	0
A:1195(TYR)	0	0	0	0	0	0	0	0	0
A:1196(LEU)	0	0	0	0	0	0	0	0	0
A:1197(LYS)	0	0.01	-0.01	0	0	0	0	0	0
A:1198(CYS)	0	0	0	0	0	0	0	0	0
A:1199(LEU)	0	0	0	0	0	0	0	0	0
A:1200(THR)	0	0	0	0	0	0	0	0	0
A:1201(GLN)	0	0	0	0	0	0	0	0	0
A:1202(GLN)	0	0	0	0	0	0	0	0	0
A:1203(ALA)	0	0	0	0	0	0	0	0	0
A:1204(VAL)	0	0	0	0	0	0	0	0	0
A:1205(ALA)	0	0	0	0	0	0	0	0	0
A:1206(LEU)	0	0	0	0	0	0	0	0	0
A:1207(GLN)	0	0	0	0	0	0	0	0	0
A:1208(ARG)	0	0.01	-0.01	0	0	0	0	0	0
A:1209(THR)	0	0	0	0	0	0	0	0	0
A:1210(MET)	0	0	0	0	0	0	0	0	0
A:1211(ASN)	0	0	0	0	0	0	0	0	0
A:1212(GLU)	0	0	0	0	0	0	0	0	0
A:1213(ILE)	0	0	0	0	0	0	0	0	0
A:1214(TYR)	0	0	0	0	0	0	0	0	0
A:1215(ARG)	0	0.01	-0.01	0	0	0	0	0	0
A:1216(ASN)	0	0	0	0	0	0	0	0	0
A:1217(GLY)	0	0	0	0	0	0	0	0	0
A:1218(SER)	0	0	0	0	0	0	0	0	0
A:1219(SER)	0	0	0	0	0	0	0	0	0
A:1220(ALA)	0	0	0	0	0	0	0	0	0
A:1221(ASN)	0	0	0	0	0	0	0	0	0
A:1222(ILE)	0	0	0	0	0	0	0	0	0
A:1223(PRO)	0	0	0	0	0	0	0	0	0
A:1224(PRO)	0	0	0	0	0	0	0	0	0
A:1225(LEU)	0	0	0	0	0	0	0	0	0
A:1226(LYS)	0	0.01	-0.01	0	0	0	0	0	0
A:1227(PHE)	0	0	0	0	0	0	0	0	0
A:1228(THR)	0	0	0	0	0	0	0	0	0
A:1229(ALA)	0	0	0	0	0	0	0	0	0
A:1230(PRO)	0	0	0	0	0	0	0	0	0
A:1231(SER)	0	0	0	0	0	0	0	0	0
A:1232(MET)	0	0	0	0	0	0	0	0	0
A:1233(THR)	0	0	0	0	0	0	0	0	0
A:1234(SER)	0	0	0	0	0	0	0	0	0
A:1235(VAL)	0	0	0	0	0	0	0	0	0
A:1236(LEU)	0	0	0	0	0	0	0	0	0
A:1237(GLU)	0	-0.02	0.02	0	0	0	0	0	0
A:1238(GLN)	0	0	0	0	0	0	0	0	0
A:1239(LEU)	0	0	0	0	0	0	0	0	0
A:1240(ASN)	0	0	0	0	0	0	0	0	0
A:1241(VAL)	0	0	0	0	0	0	0	0	0
A:1242(ILE)	0	0	0	0	0	0	0	0	0
A:1243(ASN)	0	0	0	0	0	0	0	0	0
A:1244(GLY)	0	0	0	0	0	0	0	0	0
A:1245(ILE)	0	0	0	0	0	0	0	0	0
A:1246(LEU)	0	0	0	0	0	0	0	0	0
A:1247(PHE)	0	0	0	0	0	0	0	0	0
A:1248(ILE)	0	0	0	0	0	0	0	0	0
A:1249(PRO)	0	0	0	0	0	0	0	0	0
A:1250(LEU)	0	0	0	0	0	0	0	0	0
A:1251(SER)	0	0	0	0	0	0	0	0	0
A:1252(GLN)	0	0	0	0	0	0	0	0	0
A:1253(LYS)	0	0.01	-0.01	0	0	0	0	0	0
A:1254(ASP)	0	-0.01	0.01	0	0	0	0	0	0
A:1255(LEU)	0	0	0	0	0	0	0	0	0
A:1256(GLU)	0	-0.01	0.01	0	0	0	0	0	0
A:1257(ASN)	0	0	0	0	0	0	0	0	0
A:1258(LEU)	0	0	0	0	0	0	0	0	0
A:1259(LYS)	0	0.01	-0.01	0	0	0	0	0	0
A:1260(ALA)	0	0	0	0	0	0	0	0	0
A:1261(GLU)	0	-0.01	0.01	0	0	0	0	0	0
A:1262(VAL)	0	0	0	0	0	0	0	0	0
A:1263(ALA)	0	0	0	0	0	0	0	0	0
A:1264(ARG)	0	0.02	-0.02	0	0	0	0	0	0
A:1265(ARG)	0	0.02	-0.02	0	0	0	0	0	0
A:1266(HIE)	0	0	0	0	0	0	0	0	0
A:1267(GLN)	0	0	0	0	0	0	0	0	0
A:1268(LEU)	0	0	0	0	0	0	0	0	0
A:1269(GLN)	0	0	0	0	0	0	0	0	0
A:1270(GLU)	0	-0.01	0.01	0	0	0	0	0	0
A:1271(ALA)	0	0	0	0	0	0	0	0	0
A:1272(ASN)	0	0	0	0	0	0	0	0	0
A:1273(ARG)	0	0.02	-0.01	0	0	0	0	0	0
A:1274(ASN)	0	0	0	0	0	0	0	0	0
A:1275(ARG)	0	0.01	-0.01	0	0	0	0	0	0
A:1276(ASP)	0	-0.01	0.01	0	0	0	0	0	0
A:1277(LYS)	0	0.01	-0.01	0	0	0	0	0	0
A:1278(ALA)	0	0	0	0	0	0	0	0	0
A:1279(GLU)	0	-0.01	0.01	0	0	0	0	0	0
A:1280(GLU)	0	-0.01	0.01	0	0	0	0	0	0
A:1281(GLN)	0	0	0	0	0	0	0	0	0
A:1282(PRO)	0	0	0	0	0	0	0	0	0
A:1283(MET)	0	0	0	0	0	0	0	0	0
A:1284(ALA)	0	0	0	0	0	0	0	0	0
A:1285(PRO)	0	0	0	0	0	0	0	0	0
A:1286(GLU)	0	-0.01	0.01	0	0	0	0	0	0
A:1287(PRO)	0	0	0	0	0	0	0	0	0
A:1288(GLU)	0	-0.01	0.01	0	0	0	0	0	0
A:1289(PRO)	0	0	0	0	0	0	0	0	0
A:1290(GLU)	0	-0.01	0.01	0	0	0	0	0	0
A:1291(PRO)	0	0	0	0	0	0	0	0	0
A:1292(GLU)	0	-0.01	0.01	0	0	0	0	0	0
A:1293(ARG)	0	0.01	-0.01	0	0	0	0	0	0
A:1294(ALA)	0	0	0	0	0	0	0	0	0
A:1295(VAL)	0	0	0	0	0	0	0	0	0
A:1296(GLU)	0	-0.01	0.01	0	0	0	0	0	0
A:1297(ASP)	0	-0.01	0.01	0	0	0	0	0	0
A:1298(MET)	0	0	0	0	0	0	0	0	0
A:1299(GLY)	0	0	0	0	0	0	0	0	0
A:1300(SER)	0	0	0	0	0	0	0	0	0
A:1301(PRO)	0	0	0	0	0	0	0	0	0
A:1302(GLN)	0	0	0	0	0	0	0	0	0
A:1303(THR)	0	0	0	0	0	0	0	0	0
A:1304(ALA)	0	0	0	0	0	0	0	0	0
A:1305(LYS)	0	0.01	-0.01	0	0	0	0	0	0
A:1306(GLU)	0	-0.01	0.01	0	0	0	0	0	0
A:1307(GLY)	0	0	0	0	0	0	0	0	0
A:1308(PRO)	0	0	0	0	0	0	0	0	0
A:1309(SER)	0	0	0	0	0	0	0	0	0
A:1310(SER)	0	0	0	0	0	0	0	0	0
A:1311(LEU)	0	0	0	0	0	0	0	0	0
A:1312(ASN)	0	0	0	0	0	0	0	0	0
A:1313(LEU)	0	0	0	0	0	0	0	0	0
A:1314(GLN)	0	0	0	0	0	0	0	0	0
A:1315(GLY)	0	-0.01	0.01	0	0	0	0	0	0

## Sheet: CYP51A1
Res	dGbind	Coulomb	Solvation	Covalent	vdW	H-bond	Lipo	Pi-Pi	Contact
_:0(*)	-30.69	-4.42	9.96	0	-24.58	-0.38	-13.02	0	0
_:1(MET)	0	-0.03	0.02	0	0	0	0	0	0
_:2(VAL)	0	0	0	0	0	0	0	0	0
_:3(LEU)	0	0	0	0	0	0	0	0	0
_:4(LEU)	0	0	0	0	0	0	0	0	0
_:5(GLY)	0	0	0	0	0	0	0	0	0
_:6(LEU)	0	0	0	0	0	0	0	0	0
_:7(LEU)	0	0	0	0	0	0	0	0	0
_:8(GLN)	0	0	0	0	0	0	0	0	0
_:9(SER)	0	0	0	0	0	0	0	0	0
_:10(GLY)	0	0	0	0	0	0	0	0	0
_:11(GLY)	0	0	0	0	0	0	0	0	0
_:12(TRP)	0	0	0	0	0	0	0	0	0
_:13(VAL)	0	0	0	0	0	0	0	0	0
_:14(LEU)	0	0	0	0	0	0	0	0	0
_:15(GLY)	0	0	0	0	0	0	0	0	0
_:16(GLN)	0	0	0	0	0	0	0	0	0
_:17(ALA)	0	0	0	0	0	0	0	0	0
_:18(MET)	0	0	0	0	0	0	0	0	0
_:19(GLU)	0	0.02	-0.02	0	0	0	0	0	0
_:20(GLN)	0	0	0	0	0	0	0	0	0
_:21(VAL)	0	0	0	0	0	0	0	0	0
_:22(THR)	0	0	0	0	0	0	0	0	0
_:23(GLY)	0	0	0	0	0	0	0	0	0
_:24(GLY)	0	0	0	0	0	0	0	0	0
_:25(ASN)	0	0	0	0	0	0	0	0	0
_:26(LEU)	0	0	0	0	0	0	0	0	0
_:27(LEU)	0	0	0	0	0	0	0	0	0
_:28(SER)	0	0	0	0	0	0	0	0	0
_:29(THR)	0	0	0	0	0	0	0	0	0
_:30(LEU)	0	0	0	0	0	0	0	0	0
_:31(LEU)	0	0	0	0	0	0	0	0	0
_:32(ILE)	0	0	0	0	0	0	0	0	0
_:33(ALA)	0	0	0	0	0	0	0	0	0
_:34(CYS)	0	0	0	0	0	0	0	0	0
_:35(ALA)	0	0	0	0	0	0	0	0	0
_:36(PHE)	0	0	0	0	0	0	0	0	0
_:37(THR)	0	0	0	0	0	0	0	0	0
_:38(LEU)	0	0	0	0	0	0	0	0	0
_:39(SER)	0	0	0	0	0	0	0	0	0
_:40(LEU)	0	0	0	0	0	0	0	0	0
_:41(VAL)	0	0	0	0	0	0	0	0	0
_:42(TYR)	0	0	0	0	0	0	0	0	0
_:43(LEU)	0	0	0	0	0	0	0	0	0
_:44(PHE)	0	0	0	0	0	0	0	0	0
_:45(ARG)	0	-0.04	0.04	0	0	0	0	0	0
_:46(LEU)	0	0	0	0	0	0	0	0	0
_:47(ALA)	0	0	0	0	0	0	0	0	0
_:48(VAL)	0	0	0	0	0	0	0	0	0
_:49(GLY)	0	0	0	0	0	0	0	0	0
_:50(HIS)	0	0	0	0	0	0	0	0	0
_:51(MET)	0	0	0	0	0	0	0	0	0
_:52(VAL)	0	0	0	0	0	0	0	0	0
_:53(GLN)	0	0	0	0	0	0	0	0	0
_:54(LEU)	0	0	0	0	0	0	0	0	0
_:55(PRO)	0	0	0	0	0	0	0	0	0
_:56(ALA)	0	0	0	0	0	0	0	0	0
_:57(GLY)	0	0	0	0	0	0	0	0	0
_:58(ALA)	0	0	0	0	0	0	0	0	0
_:59(LYS)	0	-0.03	0.03	0	0	0	0	0	0
_:60(SER)	-0.01	0	0	0	0	0	0	0	0
_:61(PRO)	0	0	0	0	0	0	0	0	0
_:62(PRO)	0.01	0.01	0	0	0	0	0	0	0
_:63(HIE)	0	0	0	0	0	0	0	0	0
_:64(ILE)	0	0	0	0	0	0	0	0	0
_:65(TYR)	0	0	0	0	0	0	0	0	0
_:66(SER)	0	0	0	0	0	0	0	0	0
_:67(PRO)	0	0	0	0	0	0	0	0	0
_:68(ILE)	0	0	0	0	0	0	0	0	0
_:69(PRO)	0	0	0	0	0	0	0	0	0
_:70(PHE)	0	0	0	0	0	0	0	0	0
_:71(LEU)	0.01	0	0	0	0	0	0	0	0
_:72(GLY)	-0.01	0	-0.01	0	0	0	0	0	0
_:73(HIE)	0.01	0.01	0.01	0	0	0	0	0	0
_:74(ALA)	0	0.01	0	0	0	0	0	0	0
_:75(ILE)	0.01	0.01	0	0	0	0	0	0	0
_:76(ALA)	0	0	-0.01	0	0	0	0	0	0
_:77(PHE)	0.1	0.01	0.1	0	0	0	0	0	0
_:78(GLY)	0.01	0.01	0.01	0	0	0	0	0	0
_:79(LYS)	-0.01	-0.06	0.05	0	0	0	0	0	0
_:80(SER)	-0.02	-0.01	-0.01	0	0	0	0	0	0
_:81(PRO)	0.01	-0.01	0.02	0	0	0	0	0	0
_:82(ILE)	0.11	0	0.11	0	0	0	0	0	0
_:83(GLU)	0.04	0.06	-0.02	0	0	0	0	0	0
_:84(PHE)	-0.03	-0.01	-0.02	0	0	0	0	0	0
_:85(LEU)	0.01	-0.01	0.02	0	0	0	0	0	0
_:86(GLU)	0.04	0.06	-0.02	0	0	0	0	0	0
_:87(ASN)	0	-0.01	0	0	0	0	0	0	0
_:88(ALA)	-0.02	-0.01	-0.01	0	0	0	0	0	0
_:89(TYR)	0	0	0	0	0	0	0	0	0
_:90(GLU)	0.01	0.04	-0.04	0	0	0	0	0	0
_:91(LYS)	0	-0.04	0.04	0	0	0	0	0	0
_:92(TYR)	0	0	0	0	0	0	0	0	0
_:93(GLY)	0.01	0.01	0	0	0	0	0	0	0
_:94(PRO)	0.01	0.01	0	0	0	0	0	0	0
_:95(VAL)	-0.02	-0.01	-0.01	0	0	0	0	0	0
_:96(PHE)	0.07	0.01	0.07	0	0	0	0	0	0
_:97(SER)	-0.03	-0.01	-0.02	0	0	0	0	0	0
_:98(PHE)	0.09	0.01	0.08	0	0	0	0	0	0
_:99(THR)	-0.01	0	-0.01	0	0	0	0	0	0
_:100(MET)	0.03	0	0.03	0	0	0	0	0	0
_:101(VAL)	0.02	0	0.02	0	0	0	0	0	0
_:102(GLY)	0	0	0	0	0	0	0	0	0
_:103(LYS)	0	-0.07	0.07	0	0	0	0	0	0
_:104(THR)	-0.02	0	-0.02	0	0	0	0	0	0
_:105(PHE)	0.08	-0.01	0.09	0	0	0	0	0	0
_:106(THR)	0.02	0.01	0.01	0	0	0	0	0	0
_:107(TYR)	0.05	-0.02	0.08	0	-0.01	0	0	0	0
_:108(LEU)	0.1	0.02	0.08	0	0	0	0	0	0
_:109(LEU)	0.06	0	0.07	0	0	0	0	0	0
_:110(GLY)	0.09	0.02	0.07	0	0	0	0	0	0
_:111(SER)	0.02	0.01	0.01	0	0	0	0	0	0
_:112(ASP)	0.03	0.05	-0.03	0	0	0	0	0	0
_:113(ALA)	0.01	0.01	0	0	0	0	0	0	0
_:114(ALA)	0.08	0.03	0.06	0	-0.01	0	0	0	0
_:115(ALA)	0.1	0.02	0.08	0	0	0	0	0	0
_:116(LEU)	0	-0.01	0.01	0	0	0	0	0	0
_:117(LEU)	-0.02	-0.03	0.04	0	-0.03	0	0	0	0
_:118(PHE)	-0.14	-0.07	0.28	0	-0.26	0	-0.09	0	0
_:119(ASN)	0.02	-0.03	0.06	0	0	0	0	0	0
_:120(SER)	-0.02	-0.02	0	0	0	0	0	0	0
_:121(LYS)	0.06	0.03	0.03	0	0	0	0	0	0
_:122(ASN)	0.1	0.03	0.08	0	-0.01	0	0	0	0
_:123(GLU)	0.02	-0.01	0.04	0	0	0	0	0	0
_:124(ASP)	-0.03	0.03	-0.05	0	0	0	0	0	0
_:125(LEU)	-0.03	0	-0.02	0	-0.01	0	0	0	0
_:126(ASN)	0.21	0.05	0.18	0	-0.01	0	0	0	0
_:127(ALA)	0.12	0.01	0.19	0	-0.06	0	-0.01	0	0
_:128(GLU)	0.31	-0.04	0.38	0	-0.02	0	0	0	0
_:129(GLU)	0	0.02	-0.01	0	-0.01	0	0	0	0
_:130(VAL)	-0.14	0.01	-0.11	0	-0.04	0	0	0	0
_:131(TYR)	-1.67	0.1	1.2	0	-1.44	0	-1.52	0	0
_:132(GLY)	0.14	0	0.16	0	-0.02	0	0	0	0
_:133(ARG)	-0.25	-0.1	-0.13	0	-0.02	0	0	0	0
_:134(LEU)	-0.35	0.02	-0.14	0	-0.21	0	-0.01	0	0
_:135(THR)	-0.54	-0.05	0.14	0	-0.43	0	-0.2	0	0
_:136(THR)	0.08	0	0.1	0	-0.02	0	0	0	0
_:137(PRO)	-0.11	-0.01	-0.08	0	-0.02	0	0	0	0
_:138(VAL)	-0.34	-0.03	-0.09	0	-0.17	0	-0.05	0	0
_:139(PHE)	-1.09	0.08	0.15	0	-0.77	0	-0.55	0	0
_:140(GLY)	0.14	-0.02	0.17	0	-0.01	0	0	0	0
_:141(LYS)	0.01	0.02	0	0	0	0	0	0	0
_:142(GLY)	-0.02	-0.01	-0.01	0	0	0	0	0	0
_:143(VAL)	0	0.03	-0.03	0	-0.01	0	0	0	0
_:144(ALA)	-0.11	0.06	-0.13	0	-0.04	0	0	0	0
_:145(TYR)	-0.71	-0.01	0.71	0	-0.84	0	-0.56	0	0
_:146(ASP)	0.05	-0.03	0.08	0	-0.01	0	0	0	0
_:147(VAL)	0.09	-0.01	0.1	0	-0.01	0	0	0	0
_:148(PRO)	0.04	-0.02	0.07	0	0	0	0	0	0
_:149(ASN)	0.14	-0.05	0.21	0	-0.01	0	0	0	0
_:150(ALA)	0.03	-0.01	0.04	0	0	0	0	0	0
_:151(ILE)	-0.02	-0.01	-0.01	0	0	0	0	0	0
_:152(PHE)	0.13	-0.01	0.22	0	-0.08	0	0	0	0
_:153(LEU)	0.05	-0.02	0.08	0	-0.01	0	0	0	0
_:154(GLU)	0	-0.11	0.12	0	0	0	0	0	0
_:155(GLN)	0.03	-0.03	0.07	0	-0.01	0	0	0	0
_:156(LYS)	-0.45	0.61	-0.98	0	-0.08	0	0	0	0
_:157(LYS)	0.01	0.11	-0.09	0	0	0	0	0	0
_:158(ILE)	-0.03	0.01	-0.04	0	0	0	0	0	0
_:159(ILE)	0.02	0.03	0	0	-0.01	0	0	0	0
_:160(LYS)	0	0.26	-0.25	0	-0.01	0	0	0	0
_:161(SER)	-0.02	0.01	-0.04	0	0	0	0	0	0
_:162(GLY)	-0.02	0.01	-0.03	0	0	0	0	0	0
_:163(LEU)	0.04	0	0.04	0	0	0	0	0	0
_:164(ASN)	0.05	-0.02	0.06	0	0	0	0	0	0
_:165(ILE)	0.01	0	0.01	0	0	0	0	0	0
_:166(ALA)	0	0	0	0	0	0	0	0	0
_:167(HIE)	0	0.01	-0.01	0	0	0	0	0	0
_:168(PHE)	0.04	0	0.04	0	0	0	0	0	0
_:169(LYS)	0	0.06	-0.05	0	0	0	0	0	0
_:170(GLN)	-0.01	0.01	-0.01	0	0	0	0	0	0
_:171(TYR)	0.04	0.01	0.04	0	0	0	0	0	0
_:172(VAL)	0.02	0	0.01	0	0	0	0	0	0
_:173(PRO)	0	0	0	0	0	0	0	0	0
_:174(ILE)	-0.01	0.01	-0.02	0	0	0	0	0	0
_:175(ILE)	0.01	0.01	0.01	0	0	0	0	0	0
_:176(GLU)	0.01	-0.03	0.05	0	0	0	0	0	0
_:177(LYS)	0	0.04	-0.04	0	0	0	0	0	0
_:178(GLU)	0	-0.03	0.03	0	0	0	0	0	0
_:179(ALA)	0	0	0	0	0	0	0	0	0
_:180(LYS)	0	0.03	-0.03	0	0	0	0	0	0
_:181(GLU)	0	-0.02	0.02	0	0	0	0	0	0
_:182(TYR)	0	0.01	0	0	0	0	0	0	0
_:183(PHE)	0.01	0	0.01	0	0	0	0	0	0
_:184(GLN)	0	0	0	0	0	0	0	0	0
_:185(SER)	0	0	0	0	0	0	0	0	0
_:186(TRP)	0.01	0	0.01	0	0	0	0	0	0
_:187(GLY)	0	0	0	0	0	0	0	0	0
_:188(GLU)	0	0	0	0	0	0	0	0	0
_:189(SER)	0	0	0	0	0	0	0	0	0
_:190(GLY)	0	0	0	0	0	0	0	0	0
_:191(GLU)	0	0.01	-0.01	0	0	0	0	0	0
_:192(ARG)	0	-0.02	0.02	0	0	0	0	0	0
_:193(ASN)	0.01	-0.01	0.02	0	0	0	0	0	0
_:194(VAL)	0.02	0	0.03	0	0	0	0	0	0
_:195(PHE)	0.1	-0.01	0.12	0	-0.01	0	0	0	0
_:196(GLU)	0.04	0.04	0	0	0	0	0	0	0
_:197(ALA)	0.01	0	0.01	0	0	0	0	0	0
_:198(LEU)	0.03	-0.01	0.04	0	0	0	0	0	0
_:199(SER)	0.02	0	0.03	0	0	0	0	0	0
_:200(GLU)	0.04	0	0.04	0	0	0	0	0	0
_:201(LEU)	0.01	-0.01	0.02	0	0	0	0	0	0
_:202(ILE)	0.02	-0.02	0.05	0	-0.01	0	0	0	0
_:203(ILE)	0.07	-0.02	0.1	0	-0.01	0	0	0	0
_:204(LEU)	0.01	-0.01	0.02	0	0	0	0	0	0
_:205(THR)	-0.01	-0.01	0	0	0	0	0	0	0
_:206(ALA)	0	0	0	0	0	0	0	0	0
_:207(SER)	-0.01	0	-0.01	0	0	0	0	0	0
_:208(HIS)	-0.01	0	0	0	0	0	0	0	0
_:209(CYS)	-0.04	0.01	-0.06	0	0	0	0	0	0
_:210(LEU)	0.02	0.01	0.02	0	0	0	0	0	0
_:211(HIE)	0.06	0.03	0.04	0	0	0	0	0	0
_:212(GLY)	0.02	0	0.03	0	0	0	0	0	0
_:213(LYS)	0	0.04	-0.04	0	0	0	0	0	0
_:214(GLU)	0	-0.05	0.04	0	0	0	0	0	0
_:215(ILE)	0.01	0.01	0.01	0	0	0	0	0	0
_:216(ARG)	-0.01	0.06	-0.07	0	0	0	0	0	0
_:217(SER)	0	0	0	0	0	0	0	0	0
_:218(GLN)	-0.01	0.01	-0.02	0	0	0	0	0	0
_:219(LEU)	0.01	0	0.01	0	0	0	0	0	0
_:220(ASN)	0.02	0	0.02	0	0	0	0	0	0
_:221(GLU)	0.01	-0.01	0.01	0	0	0	0	0	0
_:222(LYS)	0	0	0	0	0	0	0	0	0
_:223(VAL)	0	0	0	0	0	0	0	0	0
_:224(ALA)	0	0.01	0	0	0	0	0	0	0
_:225(GLN)	0.01	0.02	0	0	0	0	0	0	0
_:226(LEU)	0.02	0.02	0	0	0	0	0	0	0
_:227(TYR)	0.1	0.03	0.09	0	-0.02	0	0	0	0
_:228(ALA)	0.01	0.02	0	0	-0.01	0	0	0	0
_:229(ASP)	-0.01	0.08	-0.08	0	0	0	0	0	0
_:230(LEU)	0.02	0.02	0.04	0	-0.04	0	0	0	0
_:231(ASP)	0.2	0.31	-0.05	0	-0.06	0	0	0	0
_:232(GLY)	-0.05	-0.05	0.03	0	-0.02	0	0	0	0
_:233(GLY)	-0.19	-0.1	0	0	-0.07	0	-0.01	0	0
_:234(PHE)	-3.19	-0.09	1.02	0	-2.03	0	-2.08	0	0
_:235(THR)	0.21	-0.01	0.25	0	-0.03	0	0	0	0
_:236(HIE)	0.28	0.01	0.28	0	-0.01	0	0	0	0
_:237(ALA)	-0.01	-0.02	0.01	0	0	0	0	0	0
_:238(ALA)	-0.13	-0.03	-0.1	0	-0.01	0	0	0	0
_:239(TRP)	0.2	-0.02	0.25	0	-0.03	0	0	0	0
_:240(LEU)	0.04	-0.01	0.05	0	0	0	0	0	0
_:241(LEU)	0.04	0	0.04	0	0	0	0	0	0
_:242(PRO)	-0.01	-0.01	0	0	0	0	0	0	0
_:243(ALA)	0.02	0	0.01	0	0	0	0	0	0
_:244(TRP)	0.01	0	0.01	0	0	0	0	0	0
_:245(LEU)	0.01	0	0.01	0	0	0	0	0	0
_:246(PRO)	-0.01	0	0	0	0	0	0	0	0
_:247(LEU)	0.01	-0.01	0.02	0	0	0	0	0	0
_:248(PRO)	0	0	0	0	0	0	0	0	0
_:249(SER)	0.02	-0.02	0.04	0	0	0	0	0	0
_:250(PHE)	0.07	0	0.08	0	0	0	0	0	0
_:251(ARG)	0.01	-0.07	0.08	0	0	0	0	0	0
_:252(ARG)	-0.02	-0.12	0.1	0	0	0	0	0	0
_:253(ARG)	-0.16	-0.18	0.03	0	-0.01	0	0	0	0
_:254(ASP)	0.06	0.05	0.01	0	0	0	0	0	0
_:255(ARG)	-0.01	-0.04	0.04	0	0	0	0	0	0
_:256(ALA)	-0.02	-0.02	0	0	0	0	0	0	0
_:257(HIS)	0.05	-0.03	0.08	0	-0.01	0	0	0	0
_:258(ARG)	0.01	-0.02	0.04	0	0	0	0	0	0
_:259(GLU)	0	-0.01	0	0	0	0	0	0	0
_:260(ILE)	0.01	-0.01	0.02	0	0	0	0	0	0
_:261(LYS)	0.01	0.03	-0.02	0	0	0	0	0	0
_:262(ASN)	0	-0.01	0.01	0	0	0	0	0	0
_:263(ILE)	-0.01	0	-0.01	0	0	0	0	0	0
_:264(PHE)	0.06	0	0.06	0	0	0	0	0	0
_:265(TYR)	0.01	0	0.02	0	0	0	0	0	0
_:266(LYS)	-0.01	0.02	-0.03	0	0	0	0	0	0
_:267(ALA)	-0.01	0	-0.01	0	0	0	0	0	0
_:268(ILE)	0.01	0	0	0	0	0	0	0	0
_:269(GLN)	0	0	0	0	0	0	0	0	0
_:270(LYS)	0	0.03	-0.04	0	0	0	0	0	0
_:271(ARG)	-0.01	0.1	-0.1	0	0	0	0	0	0
_:272(ARG)	0	0.07	-0.07	0	0	0	0	0	0
_:273(LEU)	0	0	0	0	0	0	0	0	0
_:274(SER)	0	0	0	0	0	0	0	0	0
_:275(LYS)	0	0.03	-0.03	0	0	0	0	0	0
_:276(GLU)	0	-0.03	0.03	0	0	0	0	0	0
_:277(PRO)	0	0	0	0	0	0	0	0	0
_:278(ALA)	0	0	0	0	0	0	0	0	0
_:279(GLU)	-0.01	-0.06	0.06	0	0	0	0	0	0
_:280(ASP)	0	-0.08	0.08	0	0	0	0	0	0
_:281(ILE)	0.03	0.01	0.03	0	0	0	0	0	0
_:282(LEU)	0.04	0	0.05	0	0	0	0	0	0
_:283(GLN)	0.01	0	0.01	0	0	0	0	0	0
_:284(THR)	-0.04	0.01	-0.05	0	0	0	0	0	0
_:285(LEU)	0.02	0.01	0.01	0	0	0	0	0	0
_:286(LEU)	0.01	0	0	0	0	0	0	0	0
_:287(ASP)	0	-0.06	0.06	0	0	0	0	0	0
_:288(SER)	-0.01	0	-0.01	0	0	0	0	0	0
_:289(THR)	-0.01	0	0	0	0	0	0	0	0
_:290(TYR)	0.03	-0.01	0.04	0	0	0	0	0	0
_:291(LYS)	0	0.08	-0.07	0	0	0	0	0	0
_:292(ASP)	0	-0.05	0.06	0	0	0	0	0	0
_:293(GLY)	0	0	0	0	0	0	0	0	0
_:294(ARG)	0	0.08	-0.08	0	0	0	0	0	0
_:295(PRO)	0	0	-0.01	0	0	0	0	0	0
_:296(LEU)	0.01	0.01	0	0	0	0	0	0	0
_:297(THR)	0.03	-0.01	0.04	0	0	0	0	0	0
_:298(ASP)	0.02	-0.06	0.08	0	0	0	0	0	0
_:299(GLU)	0.02	-0.05	0.07	0	0	0	0	0	0
_:300(GLU)	0.07	-0.1	0.17	0	0	0	0	0	0
_:301(ILE)	0.05	-0.02	0.08	0	0	0	0	0	0
_:302(SER)	0.07	-0.02	0.09	0	0	0	0	0	0
_:303(GLY)	0.03	-0.03	0.06	0	-0.01	0	0	0	0
_:304(MET)	0.06	-0.04	0.11	0	-0.01	0	0	0	0
_:305(LEU)	0.04	-0.03	0.08	0	-0.01	0	0	0	0
_:306(ILE)	0.07	-0.04	0.15	0	-0.04	0	0	0	0
_:307(GLY)	0	-0.15	0.28	0	-0.13	0	0	0	0
_:308(LEU)	0.01	-0.07	0.16	0	-0.07	0	0	0	0
_:309(LEU)	-0.01	-0.01	0.06	0	-0.06	0	0	0	0
_:310(LEU)	-1.15	0.15	0.07	0	-1.05	0	-0.32	0	0
_:311(ALA)	-1.65	0.05	0.19	0	-1.22	0	-0.67	0	0
_:312(GLY)	0.12	-0.03	0.25	0	-0.1	0	0	0	0
_:313(GLN)	-0.12	-0.05	0.05	0	-0.12	0	0	0	0
_:314(HIS)	-2.72	-0.3	-0.37	0	-1.32	-0.03	-0.69	0	0
_:315(THR)	-1.17	0.22	-0.09	0	-0.78	0	-0.52	0	0
_:316(SER)	-0.02	0.05	-0.03	0	-0.03	0	0	0	0
_:317(SER)	-0.08	0.03	-0.09	0	-0.02	0	0	0	0
_:318(THR)	-0.06	0.04	-0.06	0	-0.04	0	0	0	0
_:319(THR)	0	0.03	-0.01	0	-0.02	0	0	0	0
_:320(SER)	-0.1	0.01	-0.1	0	0	0	0	0	0
_:321(ALA)	-0.04	-0.01	-0.03	0	0	0	0	0	0
_:322(TRP)	0.04	-0.01	0.06	0	-0.01	0	0	0	0
_:323(MET)	0.02	0	0.02	0	0	0	0	0	0
_:324(GLY)	0	0	0	0	0	0	0	0	0
_:325(PHE)	0.01	0	0.01	0	0	0	0	0	0
_:326(PHE)	0.02	0	0.02	0	0	0	0	0	0
_:327(LEU)	0	0	0	0	0	0	0	0	0
_:328(ALA)	0	0	0	0	0	0	0	0	0
_:329(LYS)	-0.01	-0.02	0.02	0	0	0	0	0	0
_:330(ASP)	0	0.01	0	0	0	0	0	0	0
_:331(LYS)	0	-0.01	0.01	0	0	0	0	0	0
_:332(PRO)	0	0	0	0	0	0	0	0	0
_:333(LEU)	0	0	0	0	0	0	0	0	0
_:334(GLN)	0	0	0.01	0	0	0	0	0	0
_:335(GLU)	0	-0.01	0.01	0	0	0	0	0	0
_:336(LYS)	0	0	-0.01	0	0	0	0	0	0
_:337(CYS)	0	0	0	0	0	0	0	0	0
_:338(TYR)	0	0	0	0	0	0	0	0	0
_:339(LEU)	0	0	0	0	0	0	0	0	0
_:340(GLU)	0	-0.03	0.03	0	0	0	0	0	0
_:341(GLN)	0	0	0.01	0	0	0	0	0	0
_:342(LYS)	0	0.01	-0.01	0	0	0	0	0	0
_:343(ALA)	0	0	0	0	0	0	0	0	0
_:344(VAL)	0	0	0	0	0	0	0	0	0
_:345(CYS)	0	0	0	0	0	0	0	0	0
_:346(GLY)	0	0	0	0	0	0	0	0	0
_:347(GLU)	0	-0.01	0.01	0	0	0	0	0	0
_:348(ASP)	0	-0.02	0.02	0	0	0	0	0	0
_:349(LEU)	0	0	0	0	0	0	0	0	0
_:350(PRO)	0	0	0	0	0	0	0	0	0
_:351(PRO)	0	0	0	0	0	0	0	0	0
_:352(LEU)	0	0	0	0	0	0	0	0	0
_:353(THR)	0	0	0	0	0	0	0	0	0
_:354(TYR)	0.01	0	0.01	0	0	0	0	0	0
_:355(ASP)	0	-0.05	0.05	0	0	0	0	0	0
_:356(GLN)	0	0	0	0	0	0	0	0	0
_:357(LEU)	0.01	0	0	0	0	0	0	0	0
_:358(LYS)	0	0.05	-0.04	0	0	0	0	0	0
_:359(ASP)	0	-0.04	0.03	0	0	0	0	0	0
_:360(LEU)	0	0	0.01	0	0	0	0	0	0
_:361(ASN)	0.01	0	0.01	0	0	0	0	0	0
_:362(LEU)	0.01	0	0.01	0	0	0	0	0	0
_:363(LEU)	0.03	0	0.03	0	0	0	0	0	0
_:364(ASP)	0.06	-0.06	0.12	0	0	0	0	0	0
_:365(ARG)	0.01	0.03	-0.02	0	0	0	0	0	0
_:366(CYS)	0.01	0.01	0	0	0	0	0	0	0
_:367(ILE)	0.09	0.01	0.09	0	0	0	0	0	0
_:368(LYS)	0.04	0.05	-0.02	0	0	0	0	0	0
_:369(GLU)	0.07	0.01	0.06	0	0	0	0	0	0
_:370(THR)	-0.01	0.02	-0.03	0	0	0	0	0	0
_:371(LEU)	0.1	0.02	0.1	0	-0.02	0	0	0	0
_:372(ARG)	-0.08	-0.02	-0.05	0	0	0	0	0	0
_:373(LEU)	-0.02	0.01	-0.03	0	0	0	0	0	0
_:374(ARG)	-0.24	-0.09	-0.13	0	-0.01	0	0	0	0
_:375(PRO)	-0.16	0.04	-0.15	0	-0.05	0	0	0	0
_:376(PRO)	-1.17	0.1	-0.12	0	-0.69	0	-0.45	0	0
_:377(ILE)	-3.32	-0.04	0.32	0	-1.87	0	-1.73	0	0
_:378(MET)	0	-0.01	0.07	0	-0.05	0	0	0	0
_:379(THR)	-0.13	-0.05	0.06	0	-0.14	0	0	0	0
_:380(MET)	-2.06	0.17	-0.08	0	-1.24	0	-0.92	0	0
_:381(MET)	0.37	0.12	0.44	0	-0.18	0	-0.01	0	0
_:382(ARG)	-1.33	-1.05	0.06	0	-0.26	-0.08	0	0	0
_:383(MET)	0.11	0.01	0.11	0	-0.01	0	0	0	0
_:384(ALA)	0.02	0	0.03	0	0	0	0	0	0
_:385(LYS)	0.02	-0.02	0.04	0	0	0	0	0	0
_:386(THR)	0.02	0.01	0.01	0	0	0	0	0	0
_:387(PRO)	-0.01	0	-0.01	0	0	0	0	0	0
_:388(GLN)	0.02	0	0.02	0	0	0	0	0	0
_:389(THR)	0	0	0	0	0	0	0	0	0
_:390(VAL)	0.01	0	0.02	0	0	0	0	0	0
_:391(ALA)	0	0	0	0	0	0	0	0	0
_:392(GLY)	0	0	0	0	0	0	0	0	0
_:393(TYR)	0	0	0	0	0	0	0	0	0
_:394(THR)	-0.01	0	-0.01	0	0	0	0	0	0
_:395(ILE)	0.01	-0.01	0.02	0	0	0	0	0	0
_:396(PRO)	0.01	0.01	0	0	0	0	0	0	0
_:397(PRO)	-0.01	0	-0.01	0	0	0	0	0	0
_:398(GLY)	-0.02	0	-0.02	0	0	0	0	0	0
_:399(HIS)	0.03	0	0.04	0	0	0	0	0	0
_:400(GLN)	0.13	0.01	0.13	0	-0.01	0	0	0	0
_:401(VAL)	0.15	0.02	0.14	0	-0.01	0	0	0	0
_:402(CYS)	-0.14	-0.04	-0.09	0	-0.01	0	0	0	0
_:403(VAL)	0.26	0.02	0.26	0	-0.03	0	0	0	0
_:404(SER)	-0.1	-0.03	-0.06	0	-0.01	0	0	0	0
_:405(PRO)	-0.11	-0.03	-0.02	0	-0.05	0	0	0	0
_:406(THR)	0.15	0	0.16	0	-0.01	0	0	0	0
_:407(VAL)	0.03	-0.02	0.05	0	0	0	0	0	0
_:408(ASN)	-0.02	-0.03	0.01	0	0	0	0	0	0
_:409(GLN)	0.11	0.01	0.11	0	-0.01	0	0	0	0
_:410(ARG)	-0.04	-0.1	0.06	0	0	0	0	0	0
_:411(LEU)	0.02	-0.01	0.03	0	0	0	0	0	0
_:412(LYS)	0.01	-0.04	0.05	0	0	0	0	0	0
_:413(ASP)	0	0.04	-0.04	0	0	0	0	0	0
_:414(SER)	-0.01	0	-0.01	0	0	0	0	0	0
_:415(TRP)	0.08	0	0.08	0	0	0	0	0	0
_:416(ALA)	0	0	0	0	0	0	0	0	0
_:417(GLU)	0	0.01	-0.01	0	0	0	0	0	0
_:418(ARG)	-0.01	-0.06	0.06	0	0	0	0	0	0
_:419(LEU)	0	0	0	0	0	0	0	0	0
_:420(ASP)	0.01	0.02	-0.01	0	0	0	0	0	0
_:421(PHE)	0.01	0	0.01	0	0	0	0	0	0
_:422(ASN)	0	0	0	0	0	0	0	0	0
_:423(PRO)	0	0	0	0	0	0	0	0	0
_:424(ASP)	0	-0.01	0.01	0	0	0	0	0	0
_:425(ARG)	-0.02	-0.01	0	0	0	0	0	0	0
_:426(TYR)	0.02	0	0.02	0	0	0	0	0	0
_:427(LEU)	0	0	0	0	0	0	0	0	0
_:428(GLN)	0	0	0	0	0	0	0	0	0
_:429(ASP)	0	-0.01	0.01	0	0	0	0	0	0
_:430(ASN)	0	0	0	0	0	0	0	0	0
_:431(PRO)	0	0	0	0	0	0	0	0	0
_:432(ALA)	0	0	0	0	0	0	0	0	0
_:433(SER)	-0.01	0	-0.01	0	0	0	0	0	0
_:434(GLY)	0	0	0	0	0	0	0	0	0
_:435(GLU)	0.01	0.02	-0.02	0	0	0	0	0	0
_:436(LYS)	-0.02	0.02	-0.04	0	0	0	0	0	0
_:437(PHE)	0.05	0.02	0.04	0	-0.01	0	0	0	0
_:438(ALA)	0.07	0.02	0.05	0	0	0	0	0	0
_:439(TYR)	-0.03	-0.01	0	0	-0.01	0	0	0	0
_:440(VAL)	0.29	0.07	0.33	0	-0.11	0	0	0	0
_:441(PRO)	0.07	-0.09	0.53	0	-0.36	0	-0.01	0	0
_:442(PHE)	-1.18	-0.19	0.63	0	-1.21	0	-0.42	0	0
_:443(GLY)	-1.42	-0.23	-0.33	0	-0.61	0	-0.24	0	0
_:444(ALA)	0.32	-0.04	0.5	0	-0.15	0	0	0	0
_:445(GLY)	0.08	-0.08	0.18	0	-0.02	0	0	0	0
_:446(ARG)	-0.08	0.15	-0.19	0	-0.04	0	0	0	0
_:447(HIS)	-2.63	-2.72	1.03	0	-0.34	-0.28	-0.32	0	0
_:448(ARG)	-1.66	0.22	-1.04	0	-0.68	0	-0.16	0	0
_:449(CYS)	-3.56	-0.19	-0.32	0	-2.04	0	-1.01	0	0
_:450(VAL)	-0.04	0.08	0.03	0	-0.15	0	0	0	0
_:451(GLY)	-0.1	0.08	-0.11	0	-0.06	0	0	0	0
_:452(GLU)	0.25	-0.24	0.57	0	-0.08	0	0	0	0
_:453(ASN)	0.11	0.02	0.1	0	-0.01	0	0	0	0
_:454(PHE)	0.07	0.04	0.04	0	-0.01	0	0	0	0
_:455(ALA)	-0.04	0.04	-0.07	0	-0.01	0	0	0	0
_:456(TYR)	0.13	0.03	0.12	0	-0.01	0	0	0	0
_:457(VAL)	0	0.02	-0.01	0	0	0	0	0	0
_:458(GLN)	0.05	-0.01	0.06	0	-0.01	0	0	0	0
_:459(ILE)	0.02	0.01	0.02	0	-0.01	0	0	0	0
_:460(LYS)	0	0.08	-0.08	0	0	0	0	0	0
_:461(THR)	-0.05	0.01	-0.06	0	0	0	0	0	0
_:462(ILE)	0	0.01	0	0	0	0	0	0	0
_:463(TRP)	0.05	0.01	0.05	0	0	0	0	0	0
_:464(SER)	-0.01	0.01	-0.01	0	0	0	0	0	0
_:465(THR)	-0.01	0	-0.01	0	0	0	0	0	0
_:466(MET)	0	0	0	0	0	0	0	0	0
_:467(LEU)	0.01	0	0	0	0	0	0	0	0
_:468(ARG)	0	0.04	-0.04	0	0	0	0	0	0
_:469(LEU)	0	0	0	0	0	0	0	0	0
_:470(TYR)	0	0	0.01	0	0	0	0	0	0
_:471(GLU)	0	0	0	0	0	0	0	0	0
_:472(PHE)	0.01	0	0.01	0	0	0	0	0	0
_:473(ASP)	0	0.01	-0.01	0	0	0	0	0	0
_:474(LEU)	0	0	0.01	0	0	0	0	0	0
_:475(ILE)	0	0	0	0	0	0	0	0	0
_:476(ASN)	0	0	0	0	0	0	0	0	0
_:477(GLY)	0	0	0	0	0	0	0	0	0
_:478(TYR)	0	0	0	0	0	0	0	0	0
_:479(PHE)	0	0	0	0	0	0	0	0	0
_:480(PRO)	0	0	0	0	0	0	0	0	0
_:481(THR)	0.02	0	0.03	0	0	0	0	0	0
_:482(VAL)	-0.06	-0.01	-0.04	0	0	0	0	0	0
_:483(ASN)	0.05	0.01	0.04	0	0	0	0	0	0
_:484(TYR)	0.09	0.01	0.09	0	0	0	0	0	0
_:485(THR)	-0.05	0	-0.05	0	0	0	0	0	0
_:486(THR)	-0.1	-0.09	0.01	0	-0.02	0	0	0	0
_:487(MET)	-0.01	-0.06	0.26	0	-0.18	0	-0.03	0	0
_:488(ILE)	-0.94	-0.04	0.24	0	-0.71	0	-0.43	0	0
_:489(HIS)	0.16	-0.01	0.2	0	-0.03	0	0	0	0
_:490(THR)	0.02	0.02	0.01	0	-0.01	0	0	0	0
_:491(PRO)	0	0.01	0	0	0	0	0	0	0
_:492(GLU)	0.05	0.08	-0.03	0	0	0	0	0	0
_:493(ASN)	0.01	0	0.01	0	0	0	0	0	0
_:494(PRO)	0.01	0	0.02	0	0	0	0	0	0
_:495(VAL)	0	0	0	0	0	0	0	0	0
_:496(ILE)	0.01	0	0.01	0	0	0	0	0	0
_:497(ARG)	0	-0.02	0.02	0	0	0	0	0	0
_:498(TYR)	0	0	0	0	0	0	0	0	0
_:499(LYS)	0	0	0	0	0	0	0	0	0
_:500(ARG)	0	0.01	-0.01	0	0	0	0	0	0
_:501(ARG)	0	0.01	-0.01	0	0	0	0	0	0
_:502(SER)	0	0	0	0	0	0	0	0	0
_:503(LYS)	0	0	0	0	0	0	0	0	0
_:504(CL)	0.02	-0.05	0.07	0	0	0	0	0	0
_:505(NA)	0	0	0	0	0	0	0	0	0
_:506(CL)	0	0	0	0	0	0	0	0	0
_:507(CL)	0	-0.01	0.01	0	0	0	0	0	0
_:508(NA)	0	0	0	0	0	0	0	0	0
_:509(CL)	0	0	0	0	0	0	0	0	0
_:510(CL)	0	0	0	0	0	0	0	0	0
_:511(NA)	0	0	0	0	0	0	0	0	0
_:512(CL)	0.01	0	0.01	0	0	0	0	0	0
_:513(CL)	0	0	0	0	0	0	0	0	0
_:514(NA)	0	0	0	0	0	0	0	0	0
_:515(CL)	1.03	-0.58	2.27	0	-0.65	0	0	0	0
_:516(CL)	0	0	0	0	0	0	0	0	0
_:517(NA)	0	0	0	0	0	0	0	0	0
_:518(CL)	0.01	-0.01	0.02	0	0	0	0	0	0
_:519(NA)	0	0	0	0	0	0	0	0	0
_:520(CL)	0	0	0	0	0	0	0	0	0
_:521(NA)	0	0	0	0	0	0	0	0	0
_:522(CL)	0	0	0	0	0	0	0	0	0
_:523(NA)	0	0	0	0	0	0	0	0	0
_:524(CL)	0	0	0	0	0	0	0	0	0
_:525(NA)	0	0	0	0	0	0	0	0	0
_:526(CL)	0	0	0	0	0	0	0	0	0
_:527(NA)	0	0	0	0	0	0	0	0	0
_:528(CL)	0.01	-0.01	0.02	0	0	0	0	0	0
_:529(NA)	0	0	0	0	0	0	0	0	0
_:530(CL)	0	0	0.01	0	0	0	0	0	0
_:531(NA)	0	0.01	-0.01	0	0	0	0	0	0
_:532(CL)	0	0	0	0	0	0	0	0	0
_:533(NA)	0	0	0	0	0	0	0	0	0
_:534(CL)	0	0	0	0	0	0	0	0	0
_:535(NA)	0	0	0	0	0	0	0	0	0
_:536(CL)	0	0	0	0	0	0	0	0	0
_:537(NA)	0	0	0	0	0	0	0	0	0
_:538(CL)	0	0	0	0	0	0	0	0	0
_:539(NA)	0	0	0	0	0	0	0	0	0
_:540(CL)	0.03	-0.02	0.05	0	0	0	0	0	0
_:541(NA)	0	0	0	0	0	0	0	0	0
_:542(CL)	0	0	0	0	0	0	0	0	0
_:543(NA)	0	0	0	0	0	0	0	0	0
_:544(CL)	0	0	0	0	0	0	0	0	0
_:545(NA)	0	0	0.01	0	0	0	0	0	0
_:546(CL)	0	0	0	0	0	0	0	0	0
_:547(NA)	0	0	0	0	0	0	0	0	0
_:548(CL)	0	0	0	0	0	0	0	0	0
_:549(NA)	0	0	0	0	0	0	0	0	0
_:550(CL)	0	0	0	0	0	0	0	0	0
_:551(NA)	0	0	0	0	0	0	0	0	0
_:552(CL)	0.01	-0.02	0.03	0	0	0	0	0	0
_:553(NA)	0	0	0	0	0	0	0	0	0
_:554(CL)	0	0	0	0	0	0	0	0	0
_:555(NA)	0	0	0	0	0	0	0	0	0
_:556(CL)	0	0	0	0	0	0	0	0	0
_:557(NA)	0	0	0	0	0	0	0	0	0
_:558(CL)	0	0	0	0	0	0	0	0	0
_:559(NA)	0	0	0	0	0	0	0	0	0
_:560(CL)	0	0	0	0	0	0	0	0	0
_:561(NA)	0	0	0	0	0	0	0	0	0
_:562(CL)	0	-0.01	0.01	0	0	0	0	0	0
_:563(NA)	0	0	0	0	0	0	0	0	0
_:564(CL)	0	0	0	0	0	0	0	0	0
_:565(NA)	0	0	0	0	0	0	0	0	0
_:566(CL)	0	-0.01	0.01	0	0	0	0	0	0
_:567(NA)	0	0	0	0	0	0	0	0	0
_:568(CL)	0	0	0	0	0	0	0	0	0
_:569(NA)	0	0	0	0	0	0	0	0	0
_:570(CL)	0	-0.01	0.01	0	0	0	0	0	0
_:571(NA)	0	0	0	0	0	0	0	0	0
_:572(CL)	0	0	0	0	0	0	0	0	0
_:573(NA)	0	0	0	0	0	0	0	0	0
_:574(CL)	0	0	0	0	0	0	0	0	0
_:575(NA)	0	0	0	0	0	0	0	0	0
_:576(CL)	0	0	0	0	0	0	0	0	0
_:577(NA)	0	0.01	-0.01	0	0	0	0	0	0
_:578(CL)	0	0	0	0	0	0	0	0	0
_:579(NA)	0	0	0	0	0	0	0	0	0
_:580(CL)	0	0	0	0	0	0	0	0	0
_:581(NA)	0	0	0	0	0	0	0	0	0
_:582(CL)	0	0	0	0	0	0	0	0	0
_:583(NA)	0	0	0	0	0	0	0	0	0
_:584(CL)	0	0.01	-0.01	0	0	0	0	0	0
_:585(NA)	0	0	0	0	0	0	0	0	0
_:586(CL)	0	0	0	0	0	0	0	0	0
_:587(NA)	0	0	0	0	0	0	0	0	0
_:588(CL)	0	0	0	0	0	0	0	0	0
_:589(NA)	0	0	0	0	0	0	0	0	0
_:590(CL)	0	0	0	0	0	0	0	0	0
_:591(NA)	0	0	0	0	0	0	0	0	0
_:592(CL)	0	0	0	0	0	0	0	0	0
_:593(NA)	0	0	0	0	0	0	0	0	0
_:594(CL)	0	0	0	0	0	0	0	0	0
_:595(NA)	0	0.01	0	0	0	0	0	0	0
_:596(CL)	0	0	0	0	0	0	0	0	0
_:597(NA)	0	0	0	0	0	0	0	0	0
_:598(CL)	0	0	0	0	0	0	0	0	0
_:599(NA)	0	0	0	0	0	0	0	0	0
_:600(CL)	0	0	0	0	0	0	0	0	0
_:601(NA)	0	0	0	0	0	0	0	0	0
_:602(CL)	0	0	0	0	0	0	0	0	0
_:603(NA)	0	0	0	0	0	0	0	0	0
_:604(CL)	0	0	0	0	0	0	0	0	0
_:605(NA)	0	0	0	0	0	0	0	0	0
_:606(CL)	0	0	0	0	0	0	0	0	0
_:607(NA)	0	0	0	0	0	0	0	0	0
_:608(CL)	0.01	-0.03	0.04	0	0	0	0	0	0
_:609(NA)	0	0	0	0	0	0	0	0	0
_:610(CL)	0	-0.01	0.01	0	0	0	0	0	0
_:611(NA)	0	0	0	0	0	0	0	0	0
_:612(CL)	0	0	0	0	0	0	0	0	0
_:613(NA)	0	0	0	0	0	0	0	0	0
_:614(CL)	0	0	0	0	0	0	0	0	0
_:615(NA)	0	0	0	0	0	0	0	0	0
_:616(CL)	0	0	0	0	0	0	0	0	0
_:617(NA)	0	0	0	0	0	0	0	0	0
_:618(CL)	0	0	0.01	0	0	0	0	0	0
_:619(NA)	0	0	0	0	0	0	0	0	0
_:620(CL)	0	0	0	0	0	0	0	0	0
_:621(NA)	0	0	0	0	0	0	0	0	0
_:622(CL)	0.03	-0.02	0.04	0	0	0	0	0	0
_:623(NA)	0	-0.01	0	0	0	0	0	0	0
_:624(CL)	0	0	0	0	0	0	0	0	0
_:625(NA)	0	0	0	0	0	0	0	0	0
_:626(CL)	0.02	0	0.02	0	0	0	0	0	0

## Sheet: GLUD1
Res	dGbind	Coulomb	Solvation	Covalent	vdW	H-bond	Lipo	Pi-Pi	Contact
_:0(*)	-16.35	-2.31	8.9	0	-18.58	-0.32	-5.64	0	0
_:1(CL)	0	0	0	0	0	0	0	0	0
_:2(CL)	0	0	0	0	0	0	0	0	0
_:3(CL)	0	0	0	0	0	0	0	0	0
_:4(CL)	0	0	0	0	0	0	0	0	0
_:5(CL)	0	0	0	0	0	0	0	0	0
_:6(NA)	0	0	0	0	0	0	0	0	0
_:7(NA)	0	0	0	0	0	0	0	0	0
_:8(NA)	0	0	0	0	0	0	0	0	0
_:9(NA)	0	0	0	0	0	0	0	0	0
_:10(NA)	0	0.01	0	0	0	0	0	0	0
_:11(NA)	0	0	0	0	0	0	0	0	0
_:12(NA)	0	0	0	0	0	0	0	0	0
_:13(NA)	0	0	0	0	0	0	0	0	0
_:14(NA)	0	0	0	0	0	0	0	0	0
_:15(NA)	0	0	0	0	0	0	0	0	0
_:16(NA)	0	0	0	0	0	0	0	0	0
_:17(NA)	0	0	0	0	0	0	0	0	0
_:18(NA)	0	0	0	0	0	0	0	0	0
_:19(NA)	0	0	0	0	0	0	0	0	0
_:20(NA)	0	0	0	0	0	0	0	0	0
_:21(NA)	0	0	0	0	0	0	0	0	0
_:22(NA)	0	0	0	0	0	0	0	0	0
_:23(NA)	0	0	0	0	0	0	0	0	0
_:24(NA)	0	0	0	0	0	0	0	0	0
_:25(NA)	0	0	0	0	0	0	0	0	0
_:26(NA)	0	0	0	0	0	0	0	0	0
_:27(NA)	0	0	0	0	0	0	0	0	0
_:28(NA)	0	0	0	0	0	0	0	0	0
_:29(NA)	0	0	0	0	0	0	0	0	0
_:30(NA)	0	0	0	0	0	0	0	0	0
_:31(NA)	0	0	0	0	0	0	0	0	0
_:32(NA)	0	0	0	0	0	0	0	0	0
_:33(NA)	0	0	0	0	0	0	0	0	0
_:34(NA)	0	0	0	0	0	0	0	0	0
_:35(NA)	0	0	0	0	0	0	0	0	0
_:36(NA)	0	0	0	0	0	0	0	0	0
_:37(NA)	0	0	0	0	0	0	0	0	0
_:38(NA)	0	0	0	0	0	0	0	0	0
_:39(NA)	0	0	0	0	0	0	0	0	0
_:40(NA)	0	0	0	0	0	0	0	0	0
_:41(NA)	0	0	0	0	0	0	0	0	0
_:42(NA)	0	0	0	0	0	0	0	0	0
_:43(NA)	0	0.01	0	0	0	0	0	0	0
_:44(NA)	0	0	0	0	0	0	0	0	0
_:45(NA)	0	0	0	0	0	0	0	0	0
_:46(NA)	0	0	0	0	0	0	0	0	0
_:47(NA)	0	0	0	0	0	0	0	0	0
_:48(NA)	0	0	0	0	0	0	0	0	0
_:49(NA)	0	0	0	0	0	0	0	0	0
_:50(NA)	0	0	0	0	0	0	0	0	0
_:51(NA)	0	0	0	0	0	0	0	0	0
_:52(NA)	0	-0.01	0.01	0	0	0	0	0	0
_:53(NA)	0	0	0	0	0	0	0	0	0
_:54(NA)	0	0	0	0	0	0	0	0	0
_:55(NA)	0	0	0	0	0	0	0	0	0
_:56(NA)	0	0	0	0	0	0	0	0	0
_:57(NA)	0	0	0	0	0	0	0	0	0
_:58(NA)	0	0	0	0	0	0	0	0	0
_:59(NA)	0	0	0	0	0	0	0	0	0
_:60(NA)	0	0	0	0	0	0	0	0	0
_:61(NA)	0	0	0	0	0	0	0	0	0
_:62(NA)	0	0	0	0	0	0	0	0	0
_:63(NA)	0	0	0	0	0	0	0	0	0
_:64(NA)	0	0	0	0	0	0	0	0	0
_:65(NA)	0	0	0	0	0	0	0	0	0
_:66(NA)	0	0	0	0	0	0	0	0	0
_:67(NA)	0	0	0	0	0	0	0	0	0
_:68(NA)	0	0	0	0	0	0	0	0	0
_:69(NA)	0	0	0	0	0	0	0	0	0
_:70(NA)	0	0	0	0	0	0	0	0	0
_:71(NA)	0	0	0	0	0	0	0	0	0
_:72(NA)	0	0	0	0	0	0	0	0	0
_:73(NA)	0	0	0	0	0	0	0	0	0
_:74(NA)	0	0	0	0	0	0	0	0	0
_:75(NA)	0	0	0	0	0	0	0	0	0
_:76(NA)	0	0	0	0	0	0	0	0	0
_:77(NA)	0	0	0	0	0	0	0	0	0
_:78(NA)	0	0.01	0	0	0	0	0	0	0
_:79(NA)	0	0	0	0	0	0	0	0	0
_:80(NA)	0	0	0	0	0	0	0	0	0
_:81(NA)	0	0	0	0	0	0	0	0	0
_:82(NA)	0	0	0	0	0	0	0	0	0
_:83(NA)	0	0	0	0	0	0	0	0	0
_:84(NA)	0	0	0	0	0	0	0	0	0
_:85(NA)	0	0	0	0	0	0	0	0	0
_:86(NA)	0	0	0	0	0	0	0	0	0
_:87(NA)	0	0	0	0	0	0	0	0	0
_:88(NA)	0	0	0	0	0	0	0	0	0
_:89(NA)	0	0	0	0	0	0	0	0	0
_:90(NA)	0	0	0	0	0	0	0	0	0
_:91(NA)	0	0	0	0	0	0	0	0	0
_:92(NA)	0	0	0	0	0	0	0	0	0
_:93(NA)	0	0	0	0	0	0	0	0	0
_:94(NA)	0	0	0	0	0	0	0	0	0
_:95(CL)	0	0	0	0	0	0	0	0	0
_:96(NA)	0	0	0	0	0	0	0	0	0
_:97(CL)	0	0.01	-0.01	0	0	0	0	0	0
_:98(NA)	0	0	0	0	0	0	0	0	0
_:99(CL)	0	0	0	0	0	0	0	0	0
_:100(NA)	0	0	0	0	0	0	0	0	0
_:101(CL)	0	0	0	0	0	0	0	0	0
_:102(NA)	0	0	0	0	0	0	0	0	0
_:103(CL)	0	0	0	0	0	0	0	0	0
_:104(CL)	0	0	0.01	0	0	0	0	0	0
_:105(CL)	0	0	0	0	0	0	0	0	0
_:106(CL)	0	0	0	0	0	0	0	0	0
_:107(CL)	0	0	0	0	0	0	0	0	0
_:108(CL)	0	0	0	0	0	0	0	0	0
_:109(CL)	0	0	0	0	0	0	0	0	0
_:110(CL)	0	0	0	0	0	0	0	0	0
_:111(CL)	0	0	0	0	0	0	0	0	0
_:112(CL)	0	0	0	0	0	0	0	0	0
_:113(CL)	0	0	0	0	0	0	0	0	0
_:114(CL)	0	-0.01	0.01	0	0	0	0	0	0
_:115(CL)	0	0	0	0	0	0	0	0	0
_:116(CL)	0	0	0	0	0	0	0	0	0
_:117(CL)	0	-0.01	0.01	0	0	0	0	0	0
_:118(CL)	0	0	0.01	0	0	0	0	0	0
_:119(CL)	0	0	0	0	0	0	0	0	0
_:120(CL)	0.08	-0.03	0.14	0	-0.04	0	0	0	0
_:121(CL)	0	0	0	0	0	0	0	0	0
_:122(CL)	0	0	0	0	0	0	0	0	0
_:123(CL)	0	0	0	0	0	0	0	0	0
_:124(CL)	0	0	0	0	0	0	0	0	0
_:125(CL)	0	0	0	0	0	0	0	0	0
_:126(CL)	0	0	0	0	0	0	0	0	0
_:127(CL)	0.04	0.04	0	0	-0.01	0	0	0	0
_:128(CL)	0	0	0	0	0	0	0	0	0
_:129(CL)	0	0	0	0	0	0	0	0	0
_:130(CL)	0	0	0	0	0	0	0	0	0
_:131(CL)	0	0	0	0	0	0	0	0	0
_:132(CL)	0	0	0	0	0	0	0	0	0
_:133(CL)	0	0	0	0	0	0	0	0	0
_:134(CL)	0	0	0	0	0	0	0	0	0
_:135(CL)	0	0	0	0	0	0	0	0	0
_:136(CL)	0	0	0.01	0	0	0	0	0	0
_:137(CL)	0	0	0	0	0	0	0	0	0
_:138(CL)	0	0	0	0	0	0	0	0	0
_:139(CL)	0	0	0	0	0	0	0	0	0
_:140(CL)	0	0	0	0	0	0	0	0	0
_:141(CL)	0	0	0	0	0	0	0	0	0
_:142(CL)	0	0	0	0	0	0	0	0	0
_:143(CL)	0	0	0	0	0	0	0	0	0
_:144(CL)	0	0	0.01	0	0	0	0	0	0
_:145(CL)	0	0	0	0	0	0	0	0	0
_:146(CL)	0	0	0	0	0	0	0	0	0
_:147(CL)	0	0	0	0	0	0	0	0	0
_:148(CL)	0.01	0	0.01	0	0	0	0	0	0
_:149(CL)	0	-0.01	0	0	0	0	0	0	0
_:150(CL)	0.02	-0.01	0.04	0	-0.01	0	0	0	0
_:151(CL)	0	0	0	0	0	0	0	0	0
_:152(CL)	0	0	0	0	0	0	0	0	0
_:153(CL)	0	0	0	0	0	0	0	0	0
_:154(CL)	0	-0.01	0.01	0	0	0	0	0	0
_:155(CL)	0	0	0	0	0	0	0	0	0
_:156(CL)	0	0	0	0	0	0	0	0	0
_:157(CL)	0	0	0	0	0	0	0	0	0
_:158(CL)	0	-0.01	0.01	0	0	0	0	0	0
_:159(CL)	0.02	0	0.02	0	0	0	0	0	0
_:160(CL)	0	0	0	0	0	0	0	0	0
_:161(CL)	0	0	0	0	0	0	0	0	0
_:162(CL)	0	0	0	0	0	0	0	0	0
_:163(CL)	0	0	0	0	0	0	0	0	0
_:164(CL)	0.02	-0.01	0.03	0	0	0	0	0	0
_:165(CL)	0	0	0	0	0	0	0	0	0
_:166(CL)	0	0	0	0	0	0	0	0	0
_:167(CL)	0	0.01	-0.01	0	0	0	0	0	0
_:168(CL)	0	0	0	0	0	0	0	0	0
_:169(CL)	0	-0.01	0.01	0	0	0	0	0	0
_:170(CL)	0	-0.01	0.01	0	0	0	0	0	0
_:171(CL)	0	0	0	0	0	0	0	0	0
_:172(CL)	0	0	0	0	0	0	0	0	0
_:173(CL)	0	0	0	0	0	0	0	0	0
_:174(CL)	0	0	0	0	0	0	0	0	0
_:175(CL)	0	0.01	-0.01	0	0	0	0	0	0
_:176(CL)	0	0	0	0	0	0	0	0	0
_:177(CL)	0	0	0	0	0	0	0	0	0
_:178(CL)	0	0	0	0	0	0	0	0	0
_:179(CL)	0	0	0	0	0	0	0	0	0
_:180(CL)	0	0	0.01	0	0	0	0	0	0
_:181(CL)	0	0	0	0	0	0	0	0	0
_:182(CL)	0	0	0	0	0	0	0	0	0
_:183(CL)	0	0	0	0	0	0	0	0	0
_:184(CL)	0	0	0.01	0	0	0	0	0	0
_:185(CL)	0	0	0	0	0	0	0	0	0
_:186(CL)	0	0	0	0	0	0	0	0	0
_:187(CL)	0	0	0	0	0	0	0	0	0
_:188(CL)	0	-0.01	0.01	0	0	0	0	0	0
_:189(CL)	0	0	0	0	0	0	0	0	0
_:190(CL)	0	0	0	0	0	0	0	0	0
_:191(CL)	0	0	0	0	0	0	0	0	0
A:1(MET)	0	-0.01	0.01	0	0	0	0	0	0
A:2(TYR)	0	0	0	0	0	0	0	0	0
A:3(ARG)	0	-0.01	0.01	0	0	0	0	0	0
A:4(ARG)	0	-0.01	0.01	0	0	0	0	0	0
A:5(LEU)	0	0	0	0	0	0	0	0	0
A:6(GLY)	0	0	0	0	0	0	0	0	0
A:7(GLU)	0	0	0	0	0	0	0	0	0
A:8(ALA)	0	0	0	0	0	0	0	0	0
A:9(LEU)	0	0	0	0	0	0	0	0	0
A:10(LEU)	0	0	0	0	0	0	0	0	0
A:11(LEU)	0	0	0	0	0	0	0	0	0
A:12(SER)	0	0	0	0	0	0	0	0	0
A:13(ARG)	0	-0.02	0.02	0	0	0	0	0	0
A:14(ALA)	0	0	0	0	0	0	0	0	0
A:15(GLY)	0	0	0	0	0	0	0	0	0
A:16(PRO)	0	0	0	0	0	0	0	0	0
A:17(ALA)	0	0	0	0	0	0	0	0	0
A:18(ALA)	0	0	0	0	0	0	0	0	0
A:19(LEU)	0	0	0	0	0	0	0	0	0
A:20(GLY)	0	0	0	0	0	0	0	0	0
A:21(SER)	0	0	0	0	0	0	0	0	0
A:22(ALA)	0	0	0	0	0	0	0	0	0
A:23(ALA)	0	0	0	0	0	0	0	0	0
A:24(ALA)	0	0	0	0	0	0	0	0	0
A:25(ASP)	0	0.01	-0.01	0	0	0	0	0	0
A:26(SER)	0	0	0	0	0	0	0	0	0
A:27(ALA)	0	0	0	0	0	0	0	0	0
A:28(ALA)	0	0	0	0	0	0	0	0	0
A:29(LEU)	0	0	0	0	0	0	0	0	0
A:30(LEU)	0	0	0	0	0	0	0	0	0
A:31(GLY)	0	0	0	0	0	0	0	0	0
A:32(TRP)	0	0	0.01	0	0	0	0	0	0
A:33(ALA)	0	0	0	0	0	0	0	0	0
A:34(ARG)	0	0	0	0	0	0	0	0	0
A:35(GLY)	0	0	0	0	0	0	0	0	0
A:36(GLN)	0	0	0	0	0	0	0	0	0
A:37(PRO)	0	0	0	0	0	0	0	0	0
A:38(SER)	0	0	0	0	0	0	0	0	0
A:39(ALA)	0	0	0	0	0	0	0	0	0
A:40(ALA)	0	0	0	0	0	0	0	0	0
A:41(PRO)	0	0	0	0	0	0	0	0	0
A:42(GLN)	0	0	0	0	0	0	0	0	0
A:43(PRO)	0	0	0	0	0	0	0	0	0
A:44(GLY)	0	0	0	0	0	0	0	0	0
A:45(LEU)	0	0	0	0	0	0	0	0	0
A:46(THR)	0	0	0	0	0	0	0	0	0
A:47(PRO)	0	0	0	0	0	0	0	0	0
A:48(VAL)	0	0	0	0	0	0	0	0	0
A:49(ALA)	0	0	0	0	0	0	0	0	0
A:50(ARG)	-0.01	-0.04	0.04	0	0	0	0	0	0
A:51(ARG)	0	-0.05	0.05	0	0	0	0	0	0
A:52(HIS)	-0.01	-0.01	0	0	0	0	0	0	0
A:53(TYR)	0.05	-0.01	0.07	0	-0.01	0	0	0	0
A:54(SER)	0.01	0	0.03	0	-0.01	0	0	0	0
A:55(GLU)	0.03	0.02	0.01	0	0	0	0	0	0
A:56(ALA)	0	-0.01	0.01	0	0	0	0	0	0
A:57(ALA)	0	0	0	0	0	0	0	0	0
A:58(ALA)	0	0	0.01	0	0	0	0	0	0
A:59(ASP)	0.01	0.03	-0.02	0	0	0	0	0	0
A:60(ARG)	0	-0.04	0.04	0	0	0	0	0	0
A:61(GLU)	0	0.02	-0.02	0	0	0	0	0	0
A:62(ASP)	0.01	0.02	-0.01	0	0	0	0	0	0
A:63(ASP)	0.01	0.02	-0.01	0	0	0	0	0	0
A:64(PRO)	0.01	0	0	0	0	0	0	0	0
A:65(ASN)	-0.01	0	-0.01	0	0	0	0	0	0
A:66(PHE)	0.07	0	0.08	0	-0.01	0	0	0	0
A:67(PHE)	0.01	0	0.02	0	0	0	0	0	0
A:68(LYS)	0	0	0	0	0	0	0	0	0
A:69(MET)	-0.01	0	-0.01	0	0	0	0	0	0
A:70(VAL)	0.01	0	0.02	0	0	0	0	0	0
A:71(GLU)	0.02	-0.02	0.03	0	0	0	0	0	0
A:72(GLY)	0	0	0	0	0	0	0	0	0
A:73(PHE)	0	0	0	0	0	0	0	0	0
A:74(PHE)	0.02	0	0.02	0	0	0	0	0	0
A:75(ASP)	0	-0.02	0.02	0	0	0	0	0	0
A:76(ARG)	-0.01	0.02	-0.03	0	0	0	0	0	0
A:77(GLY)	0	0	-0.01	0	0	0	0	0	0
A:78(ALA)	0	0	0	0	0	0	0	0	0
A:79(SER)	0	0	0	0	0	0	0	0	0
A:80(ILE)	0	0	0	0	0	0	0	0	0
A:81(VAL)	0	0	0	0	0	0	0	0	0
A:82(GLU)	0	-0.01	0.01	0	0	0	0	0	0
A:83(ASP)	0	-0.01	0.01	0	0	0	0	0	0
A:84(LYS)	0	0.02	-0.02	0	0	0	0	0	0
A:85(LEU)	0	0	0	0	0	0	0	0	0
A:86(VAL)	0	0	0	0	0	0	0	0	0
A:87(GLU)	0	-0.01	0.01	0	0	0	0	0	0
A:88(ASP)	0	-0.02	0.02	0	0	0	0	0	0
A:89(LEU)	0	0	0	0	0	0	0	0	0
A:90(LYS)	0	0.01	-0.01	0	0	0	0	0	0
A:91(THR)	0	0	0	0	0	0	0	0	0
A:92(ARG)	0	0.01	-0.01	0	0	0	0	0	0
A:93(GLU)	0	-0.01	0.01	0	0	0	0	0	0
A:94(SER)	0	0	0	0	0	0	0	0	0
A:95(GLU)	0	-0.01	0.01	0	0	0	0	0	0
A:96(GLU)	0	-0.01	0.01	0	0	0	0	0	0
A:97(GLN)	0	0	0	0	0	0	0	0	0
A:98(LYS)	0	0.01	-0.01	0	0	0	0	0	0
A:99(ARG)	0	0.01	-0.01	0	0	0	0	0	0
A:100(ASN)	0	0	0	0	0	0	0	0	0
A:101(ARG)	0	0.01	-0.01	0	0	0	0	0	0
A:102(VAL)	0	0	0	0	0	0	0	0	0
A:103(ARG)	0	0.01	-0.01	0	0	0	0	0	0
A:104(GLY)	0	0	0	0	0	0	0	0	0
A:105(ILE)	0	0	0	0	0	0	0	0	0
A:106(LEU)	0	0	0.01	0	0	0	0	0	0
A:107(ARG)	0	0.01	-0.01	0	0	0	0	0	0
A:108(ILE)	0	0	0	0	0	0	0	0	0
A:109(ILE)	0	0	0.01	0	0	0	0	0	0
A:110(LYS)	0.01	0.01	0	0	0	0	0	0	0
A:111(PRO)	0	0	0	0	0	0	0	0	0
A:112(CYS)	0.02	0	0.02	0	0	0	0	0	0
A:113(ASN)	0	0	0.01	0	0	0	0	0	0
A:114(HIE)	0.02	0	0.02	0	0	0	0	0	0
A:115(VAL)	-0.01	0	-0.01	0	0	0	0	0	0
A:116(LEU)	0.01	0	0.02	0	0	0	0	0	0
A:117(SER)	0	0	0	0	0	0	0	0	0
A:118(LEU)	0.01	0	0.01	0	0	0	0	0	0
A:119(SER)	0	0	0	0	0	0	0	0	0
A:120(PHE)	0.01	0	0.01	0	0	0	0	0	0
A:121(PRO)	0	0	0	0	0	0	0	0	0
A:122(ILE)	0	0	0	0	0	0	0	0	0
A:123(ARG)	0	-0.01	0.01	0	0	0	0	0	0
A:124(ARG)	0	-0.01	0.01	0	0	0	0	0	0
A:125(ASP)	0	0	0	0	0	0	0	0	0
A:126(ASP)	0	0	0	0	0	0	0	0	0
A:127(GLY)	0	0	0	0	0	0	0	0	0
A:128(SER)	0	0	0	0	0	0	0	0	0
A:129(TRP)	0	0	0	0	0	0	0	0	0
A:130(GLU)	0	0.01	0	0	0	0	0	0	0
A:131(VAL)	0	0	0	0	0	0	0	0	0
A:132(ILE)	0	0	0	0	0	0	0	0	0
A:133(GLU)	0.01	0	0	0	0	0	0	0	0
A:134(GLY)	-0.02	0	-0.02	0	0	0	0	0	0
A:135(TYR)	0.02	0	0.02	0	0	0	0	0	0
A:136(ARG)	-0.36	-0.12	-0.22	0	-0.02	0	0	0	0
A:137(ALA)	0.05	0	0.05	0	0	0	0	0	0
A:138(GLN)	-0.04	-0.02	-0.02	0	0	0	0	0	0
A:139(HIE)	0.1	0	0.11	0	0	0	0	0	0
A:140(SER)	0.02	0	0.02	0	0	0	0	0	0
A:141(GLN)	0.01	0	0.01	0	0	0	0	0	0
A:142(HIE)	0.01	0.01	0	0	0	0	0	0	0
A:143(ARG)	0.01	0.02	-0.01	0	0	0	0	0	0
A:144(THR)	-0.04	-0.01	-0.02	0	0	0	0	0	0
A:145(PRO)	0.02	-0.01	0.04	0	-0.01	0	0	0	0
A:146(CYS)	-0.11	0.04	-0.14	0	-0.01	0	0	0	0
A:147(LYS)	-1.95	-1.22	-0.14	0	-0.44	-0.15	0	0	0
A:148(GLY)	-0.39	0.08	-0.03	0	-0.34	-0.01	-0.08	0	0
A:149(GLY)	-0.35	0.13	-0.08	0	-0.3	0	-0.09	0	0
A:150(ILE)	0.26	-0.01	0.32	0	-0.06	0	0	0	0
A:151(ARG)	-0.34	0.07	-0.34	0	-0.07	0	0	0	0
A:152(TYR)	0.09	0	0.09	0	-0.01	0	0	0	0
A:153(SER)	0.07	-0.01	0.08	0	0	0	0	0	0
A:154(THR)	0.01	0	0.01	0	0	0	0	0	0
A:155(ASP)	0.02	0.01	0.02	0	0	0	0	0	0
A:156(VAL)	0.01	0	0.01	0	0	0	0	0	0
A:157(SER)	0.03	-0.01	0.04	0	0	0	0	0	0
A:158(VAL)	0.01	0	0.01	0	0	0	0	0	0
A:159(ASP)	0	-0.01	0.01	0	0	0	0	0	0
A:160(GLU)	0.07	-0.01	0.09	0	0	0	0	0	0
A:161(VAL)	0.06	-0.01	0.07	0	0	0	0	0	0
A:162(LYS)	0.03	0	0.03	0	0	0	0	0	0
A:163(ALA)	-0.01	-0.01	0	0	0	0	0	0	0
A:164(LEU)	0.02	-0.02	0.06	0	-0.02	0	0	0	0
A:165(ALA)	0.07	-0.02	0.1	0	-0.01	0	0	0	0
A:166(SER)	0.04	-0.01	0.05	0	0	0	0	0	0
A:167(LEU)	0.06	-0.01	0.09	0	-0.03	0	0	0	0
A:168(MET)	-0.72	-0.09	0.33	0	-0.59	0	-0.36	0	0
A:169(THR)	0.13	-0.02	0.16	0	-0.01	0	0	0	0
A:170(TYR)	0	0.01	-0.01	0	-0.01	0	0	0	0
A:171(LYS)	-0.85	0.29	-0.93	0	-0.22	0	0	0	0
A:172(CYS)	0.1	-0.02	0.15	0	-0.04	0	0	0	0
A:173(ALA)	-0.03	0	-0.03	0	0	0	0	0	0
A:174(VAL)	-0.04	0.02	-0.05	0	-0.01	0	0	0	0
A:175(VAL)	0.02	0.01	0.02	0	-0.01	0	0	0	0
A:176(ASP)	0.02	-0.05	0.07	0	0	0	0	0	0
A:177(VAL)	-0.03	0	-0.01	0	-0.02	0	0	0	0
A:178(PRO)	-0.03	0	-0.03	0	0	0	0	0	0
A:179(PHE)	-0.01	0	0.04	0	-0.05	0	0	0	0
A:180(GLY)	0.1	0.01	0.1	0	-0.01	0	0	0	0
A:181(GLY)	-0.13	0.03	-0.15	0	-0.01	0	0	0	0
A:182(ALA)	0.03	-0.04	0.09	0	-0.03	0	0	0	0
A:183(LYS)	-0.28	0.08	-0.31	0	-0.06	0	0	0	0
A:184(ALA)	0.1	-0.01	0.12	0	-0.01	0	0	0	0
A:185(GLY)	0.02	0	0.02	0	0	0	0	0	0
A:186(VAL)	0.05	0	0.06	0	0	0	0	0	0
A:187(LYS)	0	0	0	0	0	0	0	0	0
A:188(ILE)	0.04	0	0.05	0	0	0	0	0	0
A:189(ASN)	0.01	0	0.01	0	0	0	0	0	0
A:190(PRO)	0	0	0	0	0	0	0	0	0
A:191(LYS)	0.01	-0.02	0.03	0	0	0	0	0	0
A:192(ASN)	0	0	0	0	0	0	0	0	0
A:193(TYR)	0	0	0	0	0	0	0	0	0
A:194(THR)	0.01	0	0.01	0	0	0	0	0	0
A:195(ASP)	0.01	0	0.01	0	0	0	0	0	0
A:196(ASN)	0	0	0	0	0	0	0	0	0
A:197(GLU)	0	0.01	0	0	0	0	0	0	0
A:198(LEU)	0.01	0	0.01	0	0	0	0	0	0
A:199(GLU)	0.02	0.01	0.01	0	0	0	0	0	0
A:200(LYS)	0	-0.01	0	0	0	0	0	0	0
A:201(ILE)	-0.01	0	-0.01	0	0	0	0	0	0
A:202(THR)	0.03	0	0.02	0	0	0	0	0	0
A:203(ARG)	0.02	-0.02	0.04	0	0	0	0	0	0
A:204(ARG)	-0.01	-0.01	0.01	0	0	0	0	0	0
A:205(PHE)	0.05	0	0.05	0	0	0	0	0	0
A:206(THR)	0.02	0.01	0.01	0	0	0	0	0	0
A:207(MET)	0	0	0	0	0	0	0	0	0
A:208(GLU)	-0.02	0.01	-0.03	0	0	0	0	0	0
A:209(LEU)	0.01	0	0.01	0	0	0	0	0	0
A:210(ALA)	0.01	0	0.01	0	0	0	0	0	0
A:211(LYS)	0	-0.01	0.01	0	0	0	0	0	0
A:212(LYS)	-0.01	-0.01	0.01	0	0	0	0	0	0
A:213(GLY)	-0.01	0	-0.01	0	0	0	0	0	0
A:214(PHE)	-0.01	0.01	-0.01	0	0	0	0	0	0
A:215(ILE)	-0.02	-0.02	0	0	0	0	0	0	0
A:216(GLY)	0.05	0.01	0.05	0	0	0	0	0	0
A:217(PRO)	0.02	0.01	0.01	0	0	0	0	0	0
A:218(GLY)	0.01	0	0.01	0	0	0	0	0	0
A:219(ILE)	-0.04	-0.01	-0.03	0	0	0	0	0	0
A:220(ASP)	0.11	0.08	0.04	0	-0.01	0	0	0	0
A:221(VAL)	0.22	0.14	0.13	0	-0.05	0	0	0	0
A:222(PRO)	0.02	0.13	-0.02	0	-0.09	0	0	0	0
A:223(ALA)	-1.16	0.06	-0.25	0	-0.62	0	-0.35	0	0
A:224(PRO)	-0.66	-0.11	1.06	0	-1.08	0	-0.53	0	0
A:225(ASP)	0.16	-0.25	1.5	0	-0.86	0	-0.23	0	0
A:226(MET)	0.03	-0.06	0.34	0	-0.2	0	-0.05	0	0
A:227(SER)	0.04	0.01	0.05	0	-0.02	0	0	0	0
A:228(THR)	0.25	-0.06	0.36	0	-0.05	0	0	0	0
A:229(GLY)	0.16	0.02	0.16	0	-0.02	0	0	0	0
A:230(GLU)	0.16	-0.03	0.21	0	-0.03	0	0	0	0
A:231(ARG)	0	0.02	-0.01	0	-0.01	0	0	0	0
A:232(GLU)	0.07	0	0.08	0	-0.01	0	0	0	0
A:233(MET)	0.06	0.04	0.07	0	-0.05	0	0	0	0
A:234(SER)	-0.01	0.01	-0.01	0	0	0	0	0	0
A:235(TRP)	-0.02	0	-0.02	0	0	0	0	0	0
A:236(ILE)	-0.02	-0.01	-0.01	0	-0.01	0	0	0	0
A:237(ALA)	0	0	0.01	0	0	0	0	0	0
A:238(ASP)	0	0.02	-0.02	0	0	0	0	0	0
A:239(THR)	-0.02	-0.01	-0.02	0	0	0	0	0	0
A:240(TYR)	0.01	0	0.02	0	0	0	0	0	0
A:241(ALA)	0	0	0.01	0	0	0	0	0	0
A:242(SER)	0	0	0	0	0	0	0	0	0
A:243(THR)	0	0	0	0	0	0	0	0	0
A:244(ILE)	0	0	0	0	0	0	0	0	0
A:245(GLY)	0	0	0	0	0	0	0	0	0
A:246(HIP)	0	-0.02	0.02	0	0	0	0	0	0
A:247(TYR)	0	0	0	0	0	0	0	0	0
A:248(ASP)	0.01	0.04	-0.03	0	0	0	0	0	0
A:249(ILE)	0	0	0	0	0	0	0	0	0
A:250(ASN)	0.01	0	0.01	0	0	0	0	0	0
A:251(ALA)	0.01	0.01	0	0	0	0	0	0	0
A:252(HIS)	0.01	0.01	0	0	0	0	0	0	0
A:253(ALA)	0.04	0.03	0.02	0	0	0	0	0	0
A:254(CYS)	0.01	0.02	0	0	0	0	0	0	0
A:255(VAL)	-0.18	-0.06	-0.1	0	-0.02	0	0	0	0
A:256(THR)	0.13	-0.21	0.58	0	-0.18	-0.03	-0.02	0	0
A:257(GLY)	-0.16	-0.01	-0.01	0	-0.12	0	-0.03	0	0
A:258(LYS)	0	-0.1	0.13	0	-0.02	0	0	0	0
A:259(PRO)	0.04	0.01	0.04	0	-0.01	0	0	0	0
A:260(ILE)	0.01	0.01	0.01	0	0	0	0	0	0
A:261(SER)	0.01	0	0.01	0	0	0	0	0	0
A:262(GLN)	0.01	0.01	0	0	0	0	0	0	0
A:263(GLY)	0.01	0.01	0	0	0	0	0	0	0
A:264(GLY)	-0.09	-0.01	-0.08	0	0	0	0	0	0
A:265(ILE)	0.03	-0.01	0.05	0	-0.02	0	0	0	0
A:266(HIS)	0.04	0	0.05	0	-0.01	0	0	0	0
A:267(GLY)	0.06	-0.02	0.09	0	-0.01	0	0	0	0
A:268(ARG)	-0.36	-0.15	0.07	0	-0.21	-0.03	-0.05	0	0
A:269(ILE)	0.01	-0.04	0.26	0	-0.17	0	-0.03	0	0
A:270(SER)	0.1	-0.03	0.15	0	-0.02	0	0	0	0
A:271(ALA)	-0.08	-0.02	-0.02	0	-0.04	0	0	0	0
A:272(THR)	-1.61	-0.14	0.16	0	-1	0	-0.63	0	0
A:273(GLY)	0.02	-0.03	0.12	0	-0.06	0	0	0	0
A:274(ARG)	-0.07	0.14	-0.18	0	-0.02	0	0	0	0
A:275(GLY)	-0.14	0.08	-0.17	0	-0.04	0	0	0	0
A:276(VAL)	-0.3	0.02	0.05	0	-0.26	0	-0.11	0	0
A:277(PHE)	0.01	0.02	0.01	0	-0.01	0	0	0	0
A:278(HIS)	-0.04	0.02	-0.05	0	-0.01	0	0	0	0
A:279(GLY)	-0.08	0.03	-0.11	0	0	0	0	0	0
A:280(ILE)	0.01	0.01	0.01	0	-0.01	0	0	0	0
A:281(GLU)	0.02	-0.05	0.07	0	0	0	0	0	0
A:282(ASN)	-0.02	0.02	-0.04	0	0	0	0	0	0
A:283(PHE)	0.03	0	0.03	0	0	0	0	0	0
A:284(ILE)	0	0	0	0	0	0	0	0	0
A:285(ASN)	0	0.01	-0.01	0	0	0	0	0	0
A:286(GLU)	0	-0.03	0.03	0	0	0	0	0	0
A:287(ALA)	0	0	0	0	0	0	0	0	0
A:288(SER)	0	0	0	0	0	0	0	0	0
A:289(TYR)	0	0	0	0	0	0	0	0	0
A:290(MET)	0	0	0	0	0	0	0	0	0
A:291(SER)	0	0	0	0	0	0	0	0	0
A:292(ILE)	0	0	0	0	0	0	0	0	0
A:293(LEU)	0	0	0	0	0	0	0	0	0
A:294(GLY)	0	0	0	0	0	0	0	0	0
A:295(MET)	0	0	0	0	0	0	0	0	0
A:296(THR)	0	0	0	0	0	0	0	0	0
A:297(PRO)	0	0	0	0	0	0	0	0	0
A:298(GLY)	0	0	0	0	0	0	0	0	0
A:299(PHE)	0.02	0	0.02	0	0	0	0	0	0
A:300(GLY)	0	0	0	0	0	0	0	0	0
A:301(ASP)	0	0	0	0	0	0	0	0	0
A:302(LYS)	0	0.01	-0.01	0	0	0	0	0	0
A:303(THR)	0	0	0	0	0	0	0	0	0
A:304(PHE)	0.01	-0.01	0.02	0	0	0	0	0	0
A:305(VAL)	0.01	0	0.02	0	0	0	0	0	0
A:306(VAL)	-0.03	-0.03	0.01	0	-0.01	0	0	0	0
A:307(GLN)	0.19	0.07	0.13	0	-0.02	0	0	0	0
A:308(GLY)	0.05	0.07	0.02	0	-0.03	0	0	0	0
A:309(PHE)	0	-0.01	0.04	0	-0.02	0	0	0	0
A:310(GLY)	0.07	-0.02	0.13	0	-0.04	0	0	0	0
A:311(ASN)	-0.12	0.06	-0.05	0	-0.11	0	-0.01	0	0
A:312(VAL)	-1.59	0.01	0.19	0	-1.08	0	-0.7	0	0
A:313(GLY)	0.1	-0.07	0.24	0	-0.07	0	-0.01	0	0
A:314(LEU)	-0.01	0.01	0	0	-0.01	0	0	0	0
A:315(HIS)	-0.09	0.02	-0.08	0	-0.02	0	0	0	0
A:316(SER)	-0.05	-0.01	0	0	-0.03	0	0	0	0
A:317(MET)	0	0	0.01	0	-0.01	0	0	0	0
A:318(ARG)	-0.01	0.05	-0.05	0	0	0	0	0	0
A:319(TYR)	-0.01	0	0	0	-0.01	0	0	0	0
A:320(LEU)	0.01	0	0.01	0	0	0	0	0	0
A:321(HIS)	0.01	0	0	0	0	0	0	0	0
A:322(ARG)	0	0.05	-0.05	0	0	0	0	0	0
A:323(PHE)	0	0	0	0	0	0	0	0	0
A:324(GLY)	0	0	0	0	0	0	0	0	0
A:325(ALA)	-0.01	0	0	0	0	0	0	0	0
A:326(LYS)	0	0	0	0	0	0	0	0	0
A:327(CYS)	0	0	0	0	0	0	0	0	0
A:328(VAL)	0	0	0	0	0	0	0	0	0
A:329(GLY)	0.01	0	0.01	0	0	0	0	0	0
A:330(VAL)	-0.01	-0.01	0	0	0	0	0	0	0
A:331(GLY)	0.05	0.01	0.04	0	0	0	0	0	0
A:332(GLU)	0.06	0.07	0.01	0	-0.01	0	0	0	0
A:333(SER)	0.01	-0.02	0.03	0	0	0	0	0	0
A:334(ASP)	0.04	0.04	0	0	0	0	0	0	0
A:335(GLY)	0.01	0	0.01	0	0	0	0	0	0
A:336(SER)	-0.01	-0.01	0	0	0	0	0	0	0
A:337(ILE)	0.01	0.01	0.01	0	0	0	0	0	0
A:338(TRP)	0	0	0	0	0	0	0	0	0
A:339(ASN)	0	0	0	0	0	0	0	0	0
A:340(PRO)	0	0	0	0	0	0	0	0	0
A:341(ASP)	0	0	0	0	0	0	0	0	0
A:342(GLY)	0	0	0	0	0	0	0	0	0
A:343(ILE)	0.01	0	0.01	0	0	0	0	0	0
A:344(ASP)	0	0	0	0	0	0	0	0	0
A:345(PRO)	0	0	0	0	0	0	0	0	0
A:346(LYS)	0	0.01	0	0	0	0	0	0	0
A:347(GLU)	0	0	0	0	0	0	0	0	0
A:348(LEU)	0	0	0	0	0	0	0	0	0
A:349(GLU)	0.03	-0.01	0.04	0	0	0	0	0	0
A:350(ASP)	0.01	0	0.01	0	0	0	0	0	0
A:351(PHE)	0	0	0	0	0	0	0	0	0
A:352(LYS)	-0.01	-0.03	0.03	0	0	0	0	0	0
A:353(LEU)	0	0	0	0	0	0	0	0	0
A:354(GLN)	0	0	0	0	0	0	0	0	0
A:355(HIP)	0	-0.01	0.01	0	0	0	0	0	0
A:356(GLY)	0	0	0	0	0	0	0	0	0
A:357(SER)	-0.01	-0.01	0	0	0	0	0	0	0
A:358(ILE)	0.01	0	0.01	0	0	0	0	0	0
A:359(LEU)	0	0	0.01	0	0	0	0	0	0
A:360(GLY)	0	0	0	0	0	0	0	0	0
A:361(PHE)	0	0	0	0	0	0	0	0	0
A:362(PRO)	0	0	0	0	0	0	0	0	0
A:363(LYS)	0	0	0	0	0	0	0	0	0
A:364(ALA)	0	0	0	0	0	0	0	0	0
A:365(LYS)	0	-0.01	0.01	0	0	0	0	0	0
A:366(VAL)	0	0	0	0	0	0	0	0	0
A:367(TYR)	0	0	0	0	0	0	0	0	0
A:368(GLU)	0	0.02	-0.02	0	0	0	0	0	0
A:369(GLY)	0	0	0	0	0	0	0	0	0
A:370(SER)	0	0	0	0	0	0	0	0	0
A:371(ILE)	0	-0.01	0.01	0	0	0	0	0	0
A:372(LEU)	0.02	0	0.02	0	0	0	0	0	0
A:373(GLU)	0.01	0.03	-0.02	0	0	0	0	0	0
A:374(ALA)	0	0	0	0	0	0	0	0	0
A:375(ASP)	0	0.02	-0.02	0	0	0	0	0	0
A:376(CYS)	0	0	0	0	0	0	0	0	0
A:377(ASP)	0	0.01	-0.01	0	0	0	0	0	0
A:378(ILE)	-0.01	0	-0.01	0	0	0	0	0	0
A:379(LEU)	0	-0.01	0.02	0	0	0	0	0	0
A:380(ILE)	-0.03	0.01	0	0	-0.04	0	0	0	0
A:381(PRO)	0.11	0.01	0.16	0	-0.05	0	0	0	0
A:382(ALA)	-0.46	0.03	-0.01	0	-0.41	0	-0.08	0	0
A:383(ALA)	0.16	0.07	0.21	0	-0.11	0	-0.01	0	0
A:384(SER)	0.11	0.03	0.16	0	-0.08	0	-0.01	0	0
A:385(GLU)	0.21	0.02	0.23	0	-0.04	0	0	0	0
A:386(LYS)	0.02	-0.01	0.04	0	0	0	0	0	0
A:387(GLN)	-0.03	0.01	-0.03	0	-0.01	0	0	0	0
A:388(LEU)	0.05	0	0.05	0	0	0	0	0	0
A:389(THR)	0.01	0	0.01	0	0	0	0	0	0
A:390(LYS)	0	-0.01	0.01	0	0	0	0	0	0
A:391(SER)	0	0	0	0	0	0	0	0	0
A:392(ASN)	0	0	0	0	0	0	0	0	0
A:393(ALA)	0	0	0	0	0	0	0	0	0
A:394(PRO)	0	0	0	0	0	0	0	0	0
A:395(ARG)	0	-0.03	0.03	0	0	0	0	0	0
A:396(VAL)	0	0	0.01	0	0	0	0	0	0
A:397(LYS)	0	-0.02	0.02	0	0	0	0	0	0
A:398(ALA)	-0.01	0	0	0	0	0	0	0	0
A:399(LYS)	0	0	0	0	0	0	0	0	0
A:400(ILE)	0	0.01	-0.01	0	0	0	0	0	0
A:401(ILE)	-0.01	-0.02	0.01	0	0	0	0	0	0
A:402(ALA)	-0.01	0.03	-0.02	0	-0.02	0	0	0	0
A:403(GLU)	0.29	-0.05	0.43	0	-0.08	0	0	0	0
A:404(GLY)	0.12	-0.19	1.13	0	-0.74	0	-0.08	0	0
A:405(ALA)	-0.69	-0.01	0.1	0	-0.61	0	-0.17	0	0
A:406(ASN)	0.37	-0.1	1.42	0	-0.86	0	-0.08	0	0
A:407(GLY)	-0.02	-0.01	0.01	0	-0.02	0	0	0	0
A:408(PRO)	-0.04	-0.01	0	0	-0.02	0	0	0	0
A:409(THR)	0.03	0	0.03	0	0	0	0	0	0
A:410(THR)	0.06	0	0.05	0	0	0	0	0	0
A:411(PRO)	0	0	0	0	0	0	0	0	0
A:412(GLU)	0	0	0	0	0	0	0	0	0
A:413(ALA)	-0.01	0	-0.01	0	0	0	0	0	0
A:414(ASP)	0.03	-0.01	0.04	0	0	0	0	0	0
A:415(LYS)	0	0	0	0	0	0	0	0	0
A:416(ILE)	0	0	0	0	0	0	0	0	0
A:417(PHE)	0.01	0	0.02	0	0	0	0	0	0
A:418(LEU)	0	0	0	0	0	0	0	0	0
A:419(GLU)	0	0	0	0	0	0	0	0	0
A:420(ARG)	-0.01	-0.01	0.01	0	0	0	0	0	0
A:421(ASN)	0	0	0	0	0	0	0	0	0
A:422(ILE)	-0.01	0	-0.01	0	0	0	0	0	0
A:423(MET)	0.01	0	0.01	0	0	0	0	0	0
A:424(VAL)	-0.04	-0.01	-0.03	0	0	0	0	0	0
A:425(ILE)	0.08	0.01	0.07	0	-0.01	0	0	0	0
A:426(PRO)	0.06	-0.03	0.1	0	-0.01	0	0	0	0
A:427(ASP)	0.72	-0.21	1.06	0	-0.13	0	0	0	0
A:428(LEU)	0.18	-0.04	0.26	0	-0.03	0	0	0	0
A:429(TYR)	0.02	-0.05	0.1	0	-0.03	0	0	0	0
A:430(LEU)	-0.42	-0.14	-0.01	0	-0.25	0	-0.03	0	0
A:431(ASN)	-1.6	-0.81	1.63	0	-1.9	0	-0.53	0	0
A:432(ALA)	-0.07	-0.03	0.12	0	-0.15	0	-0.01	0	0
A:433(GLY)	-0.01	0.08	0.06	0	-0.14	0	0	0	0
A:434(GLY)	-1.47	0.21	-0.34	0	-0.98	-0.01	-0.36	0	0
A:435(VAL)	-1.69	0.06	0.15	0	-1.17	0	-0.73	0	0
A:436(THR)	-0.13	0.1	-0.16	0	-0.08	0	0	0	0
A:437(VAL)	-0.24	0.09	-0.18	0	-0.15	0	-0.01	0	0
A:438(SER)	-1.3	-0.36	0.04	0	-0.63	-0.08	-0.27	0	0
A:439(TYR)	-0.04	0.07	-0.07	0	-0.04	0	0	0	0
A:440(PHE)	-0.03	0.01	-0.02	0	-0.02	0	0	0	0
A:441(GLU)	0.28	0.16	0.19	0	-0.07	0	0	0	0
A:442(TRP)	0.03	-0.01	0.06	0	-0.02	0	0	0	0
A:443(LEU)	-0.01	0	-0.01	0	0	0	0	0	0
A:444(LYS)	-0.05	-0.02	-0.02	0	0	0	0	0	0
A:445(ASN)	-0.07	-0.02	-0.05	0	0	0	0	0	0
A:446(LEU)	-0.01	-0.01	0	0	0	0	0	0	0
A:447(ASN)	0	0	0	0	0	0	0	0	0
A:448(HIP)	-0.01	-0.03	0.02	0	0	0	0	0	0
A:449(VAL)	0.01	0.01	0	0	0	0	0	0	0
A:450(SER)	-0.01	0	-0.01	0	0	0	0	0	0
A:451(TYR)	0.03	0	0.04	0	0	0	0	0	0
A:452(GLY)	0	0	0.01	0	0	0	0	0	0
A:453(ARG)	0	0.01	-0.01	0	0	0	0	0	0
A:454(LEU)	0	0	0	0	0	0	0	0	0
A:455(THR)	0	0	0	0	0	0	0	0	0
A:456(PHE)	0	0	0	0	0	0	0	0	0
A:457(LYS)	0	0	0	0	0	0	0	0	0
A:458(TYR)	0	0	0	0	0	0	0	0	0
A:459(GLU)	0	-0.01	0.01	0	0	0	0	0	0
A:460(ARG)	0	0	0	0	0	0	0	0	0
A:461(ASP)	0	0	0	0	0	0	0	0	0
A:462(SER)	0	0	0	0	0	0	0	0	0
A:463(ASN)	0	0	0	0	0	0	0	0	0
A:464(TYR)	0	0	0	0	0	0	0	0	0
A:465(HIE)	0	0	0	0	0	0	0	0	0
A:466(LEU)	0	0	0	0	0	0	0	0	0
A:467(LEU)	0	0	0	0	0	0	0	0	0
A:468(MET)	0	0	0	0	0	0	0	0	0
A:469(SER)	0	0	0	0	0	0	0	0	0
A:470(VAL)	0	0	0	0	0	0	0	0	0
A:471(GLN)	0	0	0	0	0	0	0	0	0
A:472(GLU)	0	0	0	0	0	0	0	0	0
A:473(SER)	0	0	0	0	0	0	0	0	0
A:474(LEU)	0	0	0	0	0	0	0	0	0
A:475(GLU)	0	0	0	0	0	0	0	0	0
A:476(ARG)	0	0	0	0	0	0	0	0	0
A:477(LYS)	0	0	0	0	0	0	0	0	0
A:478(PHE)	0	0	0	0	0	0	0	0	0
A:479(GLY)	0	0	0	0	0	0	0	0	0
A:480(LYS)	0	0	0	0	0	0	0	0	0
A:481(HIE)	0	0	0	0	0	0	0	0	0
A:482(GLY)	0	0	0	0	0	0	0	0	0
A:483(GLY)	0	0	0	0	0	0	0	0	0
A:484(THR)	0	0	0	0	0	0	0	0	0
A:485(ILE)	0	0	0	0	0	0	0	0	0
A:486(PRO)	0	0	0	0	0	0	0	0	0
A:487(VAL)	0	0	0	0	0	0	0	0	0
A:488(VAL)	0	0	0	0	0	0	0	0	0
A:489(PRO)	0	0	0	0	0	0	0	0	0
A:490(THR)	0	0	0	0	0	0	0	0	0
A:491(ALA)	0	0	0	0	0	0	0	0	0
A:492(GLU)	0	-0.01	0.01	0	0	0	0	0	0
A:493(PHE)	0	0	0	0	0	0	0	0	0
A:494(GLN)	0	0	0	0	0	0	0	0	0
A:495(ASP)	0	-0.01	0.01	0	0	0	0	0	0
A:496(ARG)	0	0.01	-0.01	0	0	0	0	0	0
A:497(ILE)	0	0	0	0	0	0	0	0	0
A:498(SER)	0	0	0	0	0	0	0	0	0
A:499(GLY)	0	0	0	0	0	0	0	0	0
A:500(ALA)	0	0	0	0	0	0	0	0	0
A:501(SER)	0	0	0	0	0	0	0	0	0
A:502(GLU)	0.02	-0.01	0.03	0	0	0	0	0	0
A:503(LYS)	0.03	0.03	0	0	0	0	0	0	0
A:504(ASP)	0.01	-0.04	0.06	0	0	0	0	0	0
A:505(ILE)	-0.02	-0.01	-0.01	0	0	0	0	0	0
A:506(VAL)	0.02	-0.01	0.03	0	-0.01	0	0	0	0
A:507(HIE)	0.05	-0.02	0.08	0	-0.01	0	0	0	0
A:508(SER)	0.01	-0.01	0.01	0	0	0	0	0	0
A:509(GLY)	-0.01	0	-0.01	0	0	0	0	0	0
A:510(LEU)	0.05	0	0.06	0	-0.02	0	0	0	0
A:511(ALA)	0.03	-0.01	0.04	0	0	0	0	0	0
A:512(TYR)	-0.01	0	0	0	0	0	0	0	0
A:513(THR)	-0.06	0.02	-0.07	0	0	0	0	0	0
A:514(MET)	0.05	0	0.06	0	-0.02	0	0	0	0
A:515(GLU)	0.02	-0.05	0.08	0	0	0	0	0	0
A:516(ARG)	-0.01	0.09	-0.09	0	0	0	0	0	0
A:517(SER)	0.01	0	0.01	0	0	0	0	0	0
A:518(ALA)	0.02	0	0.01	0	0	0	0	0	0
A:519(ARG)	0.01	0.06	-0.05	0	0	0	0	0	0
A:520(GLN)	0	0	0	0	0	0	0	0	0
A:521(ILE)	0.01	0.01	0	0	0	0	0	0	0
A:522(MET)	0	0	-0.01	0	0	0	0	0	0
A:523(ARG)	0	0.05	-0.05	0	0	0	0	0	0
A:524(THR)	-0.01	0	-0.01	0	0	0	0	0	0
A:525(ALA)	0	0	0	0	0	0	0	0	0
A:526(MET)	0	0	0	0	0	0	0	0	0
A:527(LYS)	0	0.02	-0.03	0	0	0	0	0	0
A:528(TYR)	0	0	0	0	0	0	0	0	0
A:529(ASN)	0	0	0	0	0	0	0	0	0
A:530(LEU)	0	0	0	0	0	0	0	0	0
A:531(GLY)	0	0	0	0	0	0	0	0	0
A:532(LEU)	0	0	0	0	0	0	0	0	0
A:533(ASP)	0	-0.02	0.03	0	0	0	0	0	0
A:534(LEU)	0.01	-0.01	0.02	0	0	0	0	0	0
A:535(ARG)	-0.02	0.01	-0.03	0	0	0	0	0	0
A:536(THR)	0.01	0	0.01	0	0	0	0	0	0
A:537(ALA)	0	0	0	0	0	0	0	0	0
A:538(ALA)	-0.01	0	-0.01	0	0	0	0	0	0
A:539(TYR)	0.1	-0.01	0.12	0	0	0	0	0	0
A:540(VAL)	0	0	0	0	0	0	0	0	0
A:541(ASN)	-0.01	-0.01	0	0	0	0	0	0	0
A:542(ALA)	-0.01	0.01	-0.01	0	0	0	0	0	0
A:543(ILE)	0.01	0	0.01	0	0	0	0	0	0
A:544(GLU)	0	-0.03	0.03	0	0	0	0	0	0
A:545(LYS)	-0.02	0.06	-0.08	0	0	0	0	0	0
A:546(VAL)	0	0.01	0	0	0	0	0	0	0
A:547(PHE)	0	0	0	0	0	0	0	0	0
A:548(LYS)	0	0.02	-0.02	0	0	0	0	0	0
A:549(VAL)	0	0	-0.01	0	0	0	0	0	0
A:550(TYR)	0.01	0	0.01	0	0	0	0	0	0
A:551(ASN)	0	0	0	0	0	0	0	0	0
A:552(GLU)	0	-0.01	0.01	0	0	0	0	0	0
A:553(ALA)	0	0	0	0	0	0	0	0	0
A:554(GLY)	0	0	0	0	0	0	0	0	0
A:555(VAL)	0	0	0	0	0	0	0	0	0
A:556(THR)	0	0	0	0	0	0	0	0	0
A:557(PHE)	0	0	0	0	0	0	0	0	0
A:558(THR)	0	0	0	0	0	0	0	0	0

## Sheet: LSS
Res	dGbind	Coulomb	Solvation	Covalent	vdW	H-bond	Lipo	Pi-Pi	Contact
_:0(*)	-15.48	-2.16	3.93	0	-12.46	-0.11	-5.77	0	0
_:1(NA)	0	0	0	0	0	0	0	0	0
_:2(NA)	0	0.01	-0.01	0	0	0	0	0	0
_:3(NA)	0	0	0	0	0	0	0	0	0
_:4(NA)	0.01	0	0.01	0	0	0	0	0	0
_:5(NA)	0	0	0	0	0	0	0	0	0
_:6(NA)	0	0	0	0	0	0	0	0	0
_:7(NA)	0	-0.01	0.01	0	0	0	0	0	0
_:8(NA)	0	0	0	0	0	0	0	0	0
_:9(NA)	0	0	0	0	0	0	0	0	0
_:10(NA)	0	0	0	0	0	0	0	0	0
_:11(NA)	0	0	0	0	0	0	0	0	0
_:12(NA)	0	0	0	0	0	0	0	0	0
_:13(NA)	0	0	0	0	0	0	0	0	0
_:14(NA)	0	0	0	0	0	0	0	0	0
_:15(NA)	0	0	0	0	0	0	0	0	0
_:16(NA)	0	0	0	0	0	0	0	0	0
_:17(NA)	0	0	0.01	0	0	0	0	0	0
_:18(NA)	0	0	0	0	0	0	0	0	0
_:19(NA)	0	0	0	0	0	0	0	0	0
_:20(NA)	0	0	0	0	0	0	0	0	0
_:21(NA)	0	0	0	0	0	0	0	0	0
_:22(NA)	0	0	0	0	0	0	0	0	0
_:23(NA)	0	0	0	0	0	0	0	0	0
_:24(NA)	0	0	0	0	0	0	0	0	0
_:25(NA)	0	0.01	0	0	0	0	0	0	0
_:26(NA)	0	-0.01	0.01	0	0	0	0	0	0
_:27(NA)	0	0	0	0	0	0	0	0	0
_:28(NA)	0	0	0	0	0	0	0	0	0
_:29(NA)	0	0.01	0	0	0	0	0	0	0
_:30(NA)	0	0	0	0	0	0	0	0	0
_:31(NA)	0	0	0	0	0	0	0	0	0
_:32(NA)	0	0	0	0	0	0	0	0	0
_:33(NA)	0	0	0	0	0	0	0	0	0
_:34(NA)	0	0	0	0	0	0	0	0	0
_:35(NA)	0	0	0	0	0	0	0	0	0
_:36(NA)	0	0	0	0	0	0	0	0	0
_:37(NA)	-0.01	-0.01	0	0	0	0	0	0	0
_:38(NA)	0	0	0	0	0	0	0	0	0
_:39(NA)	0	0	0	0	0	0	0	0	0
_:40(NA)	0	0	0	0	0	0	0	0	0
_:41(NA)	0	0	0.01	0	0	0	0	0	0
_:42(NA)	0	0	0	0	0	0	0	0	0
_:43(NA)	0	0	0	0	0	0	0	0	0
_:44(NA)	0	0	0	0	0	0	0	0	0
_:45(NA)	0	0	0	0	0	0	0	0	0
_:46(NA)	0	0	0	0	0	0	0	0	0
_:47(NA)	0	0	0	0	0	0	0	0	0
_:48(NA)	0	0	0	0	0	0	0	0	0
_:49(NA)	0	0	0	0	0	0	0	0	0
_:50(NA)	0	0	0	0	0	0	0	0	0
_:51(NA)	0	0	0	0	0	0	0	0	0
_:52(NA)	0	0	0	0	0	0	0	0	0
_:53(NA)	0	0	0	0	0	0	0	0	0
_:54(CL)	0	0	0	0	0	0	0	0	0
_:55(NA)	0	0	0	0	0	0	0	0	0
_:56(CL)	0	0	0	0	0	0	0	0	0
_:57(NA)	0	0	0	0	0	0	0	0	0
_:58(CL)	0	0	0	0	0	0	0	0	0
_:59(NA)	0	0	0	0	0	0	0	0	0
_:60(CL)	0	0	0	0	0	0	0	0	0
_:61(NA)	0	0	0	0	0	0	0	0	0
_:62(CL)	0	0	0	0	0	0	0	0	0
_:63(NA)	0	0	0	0	0	0	0	0	0
_:64(CL)	0	0	0	0	0	0	0	0	0
_:65(NA)	0	0	0	0	0	0	0	0	0
_:66(CL)	0	0	0	0	0	0	0	0	0
_:67(NA)	0	0	0	0	0	0	0	0	0
_:68(CL)	0	0	0	0	0	0	0	0	0
_:69(NA)	0	0.01	-0.01	0	0	0	0	0	0
_:70(CL)	0	0	0	0	0	0	0	0	0
_:71(NA)	0	0	0	0	0	0	0	0	0
_:72(CL)	0.01	-0.01	0.01	0	0	0	0	0	0
_:73(NA)	0	0	0	0	0	0	0	0	0
_:74(CL)	0	0	0	0	0	0	0	0	0
_:75(NA)	0	0	0	0	0	0	0	0	0
_:76(CL)	0	0	0	0	0	0	0	0	0
_:77(NA)	0	0	0	0	0	0	0	0	0
_:78(CL)	0	0	0	0	0	0	0	0	0
_:79(NA)	0.02	-0.01	0.02	0	0	0	0	0	0
_:80(CL)	0	0	0	0	0	0	0	0	0
_:81(CL)	0	0	0	0	0	0	0	0	0
_:82(CL)	0	0	0.01	0	0	0	0	0	0
_:83(CL)	0	0	0	0	0	0	0	0	0
_:84(CL)	0	0	0	0	0	0	0	0	0
_:85(CL)	0	-0.01	0.01	0	0	0	0	0	0
_:86(CL)	0	0	0	0	0	0	0	0	0
_:87(CL)	0	0.01	-0.01	0	0	0	0	0	0
_:88(CL)	0	0	0	0	0	0	0	0	0
_:89(CL)	0	0	0	0	0	0	0	0	0
_:90(CL)	0	0	0	0	0	0	0	0	0
_:91(CL)	0	0.01	0	0	0	0	0	0	0
_:92(CL)	0	-0.01	0.01	0	0	0	0	0	0
_:93(CL)	0	0	0	0	0	0	0	0	0
_:94(CL)	0	0	0	0	0	0	0	0	0
_:95(CL)	0	0.01	-0.01	0	0	0	0	0	0
_:96(CL)	0	0	0	0	0	0	0	0	0
_:97(CL)	0	0	0.01	0	0	0	0	0	0
_:98(CL)	0	0	0	0	0	0	0	0	0
_:99(CL)	0	0	0	0	0	0	0	0	0
_:100(CL)	0	0	0	0	0	0	0	0	0
_:101(CL)	0	0	0	0	0	0	0	0	0
_:102(CL)	0	0	0	0	0	0	0	0	0
_:103(CL)	0	0	0	0	0	0	0	0	0
_:104(CL)	0	0	0.01	0	0	0	0	0	0
_:105(CL)	0	0	0	0	0	0	0	0	0
_:106(CL)	0	0	0	0	0	0	0	0	0
_:107(CL)	0	0	0	0	0	0	0	0	0
_:108(CL)	0	0	0	0	0	0	0	0	0
_:109(CL)	0	0	0	0	0	0	0	0	0
_:110(CL)	0	0	0	0	0	0	0	0	0
_:111(CL)	0	0	0	0	0	0	0	0	0
_:112(CL)	0	0	0	0	0	0	0	0	0
_:113(CL)	0	0	0	0	0	0	0	0	0
_:114(CL)	0	0	0	0	0	0	0	0	0
_:115(CL)	0	0	0	0	0	0	0	0	0
_:116(CL)	0	0	0	0	0	0	0	0	0
_:117(CL)	0	0	0	0	0	0	0	0	0
_:118(CL)	0	0	0	0	0	0	0	0	0
A:1(MET)	0	-0.01	0.01	0	0	0	0	0	0
A:2(THR)	0	0	0	0	0	0	0	0	0
A:3(GLU)	0.01	-0.01	0.01	0	0	0	0	0	0
A:4(GLY)	0	0	0	0	0	0	0	0	0
A:5(THR)	0	0	0	0	0	0	0	0	0
A:6(CYS)	0	0	0	0	0	0	0	0	0
A:7(LEU)	0	-0.01	0.01	0	0	0	0	0	0
A:8(ARG)	-0.14	0.08	-0.16	0	-0.06	0	0	0	0
A:9(ARG)	0.01	0.04	-0.03	0	0	0	0	0	0
A:10(ARG)	-0.04	0.02	-0.05	0	-0.01	0	0	0	0
A:11(GLY)	0	0	0	0	0	0	0	0	0
A:12(GLY)	0	0	0	0	0	0	0	0	0
A:13(PRO)	0	0	0	0	0	0	0	0	0
A:14(TYR)	0	0	0	0	0	0	0	0	0
A:15(LYS)	0	0.01	-0.01	0	0	0	0	0	0
A:16(THR)	0	0	0	0	0	0	0	0	0
A:17(GLU)	0	-0.02	0.01	0	0	0	0	0	0
A:18(PRO)	0	0	0	0	0	0	0	0	0
A:19(ALA)	0	0	0	0	0	0	0	0	0
A:20(THR)	0	0	0	0	0	0	0	0	0
A:21(ASP)	0	-0.01	0.01	0	0	0	0	0	0
A:22(LEU)	0	0	0	0	0	0	0	0	0
A:23(THR)	0	0	0	0	0	0	0	0	0
A:24(ARG)	0	0.02	-0.02	0	0	0	0	0	0
A:25(TRP)	0	0	0	0	0	0	0	0	0
A:26(ARG)	0	0.02	-0.02	0	0	0	0	0	0
A:27(LEU)	0	0	0	0	0	0	0	0	0
A:28(GLN)	0	0	0	0	0	0	0	0	0
A:29(ASN)	0	0	0	0	0	0	0	0	0
A:30(GLU)	0	-0.01	0.01	0	0	0	0	0	0
A:31(LEU)	0	0	0	0	0	0	0	0	0
A:32(GLY)	0	0	0	0	0	0	0	0	0
A:33(ARG)	0	0.03	-0.03	0	0	0	0	0	0
A:34(GLN)	0	0	0	0	0	0	0	0	0
A:35(ARG)	0	0.03	-0.03	0	0	0	0	0	0
A:36(TRP)	0	0	0	0	0	0	0	0	0
A:37(THR)	0	0	0	0	0	0	0	0	0
A:38(TYR)	0	0	0	0	0	0	0	0	0
A:39(TYR)	0	0	0	0	0	0	0	0	0
A:40(GLN)	0	0	0	0	0	0	0	0	0
A:41(ALA)	0	0	0	0	0	0	0	0	0
A:42(GLU)	0	-0.01	0.01	0	0	0	0	0	0
A:43(ASP)	0	-0.01	0.01	0	0	0	0	0	0
A:44(ASP)	0	-0.01	0.01	0	0	0	0	0	0
A:45(PRO)	0	0	0	0	0	0	0	0	0
A:46(GLY)	0	0	0	0	0	0	0	0	0
A:47(ARG)	0	0.02	-0.01	0	0	0	0	0	0
A:48(GLU)	0	-0.01	0.01	0	0	0	0	0	0
A:49(GLN)	0	0	0	0	0	0	0	0	0
A:50(THR)	0	0	0	0	0	0	0	0	0
A:51(GLY)	0	0	0	0	0	0	0	0	0
A:52(LEU)	0	0	0	0	0	0	0	0	0
A:53(GLU)	0	-0.01	0.01	0	0	0	0	0	0
A:54(ALA)	0	0	0	0	0	0	0	0	0
A:55(HIE)	0	0	0	0	0	0	0	0	0
A:56(SER)	0	0	0	0	0	0	0	0	0
A:57(LEU)	0	0	0	0	0	0	0	0	0
A:58(GLY)	0	0	0	0	0	0	0	0	0
A:59(LEU)	0	0	0	0	0	0	0	0	0
A:60(ASP)	0	-0.01	0.01	0	0	0	0	0	0
A:61(THR)	0	0	0	0	0	0	0	0	0
A:62(ARG)	0	0.01	-0.01	0	0	0	0	0	0
A:63(SER)	0	0	0	0	0	0	0	0	0
A:64(TYR)	0	0	0	0	0	0	0	0	0
A:65(PHE)	0	0	0	0	0	0	0	0	0
A:66(THR)	0	0	0	0	0	0	0	0	0
A:67(ASP)	0	-0.01	0	0	0	0	0	0	0
A:68(LEU)	0	0	0	0	0	0	0	0	0
A:69(PRO)	0	0	0	0	0	0	0	0	0
A:70(LYS)	0	0	0	0	0	0	0	0	0
A:71(ALA)	0	0	0	0	0	0	0	0	0
A:72(GLN)	0	0	0	0	0	0	0	0	0
A:73(THR)	0	0	0	0	0	0	0	0	0
A:74(ALA)	0	0	0	0	0	0	0	0	0
A:75(HIS)	0	0	0	0	0	0	0	0	0
A:76(GLU)	0	0	0	0	0	0	0	0	0
A:77(GLY)	0	0	0	0	0	0	0	0	0
A:78(ALA)	0	0	0	0	0	0	0	0	0
A:79(LEU)	0	0	0	0	0	0	0	0	0
A:80(ASN)	0	0	0	0	0	0	0	0	0
A:81(GLY)	0	0	0	0	0	0	0	0	0
A:82(VAL)	0	0	0	0	0	0	0	0	0
A:83(THR)	0	0	0	0	0	0	0	0	0
A:84(PHE)	0	0	0	0	0	0	0	0	0
A:85(TYR)	0	0	0	0	0	0	0	0	0
A:86(ALA)	0	0	0	0	0	0	0	0	0
A:87(LYS)	0	0.01	0	0	0	0	0	0	0
A:88(LEU)	0	0	0	0	0	0	0	0	0
A:89(GLN)	0	0	0	0	0	0	0	0	0
A:90(ALA)	0	0	0	0	0	0	0	0	0
A:91(GLU)	0	-0.01	0.01	0	0	0	0	0	0
A:92(ASP)	0	-0.01	0.01	0	0	0	0	0	0
A:93(GLY)	0	0	0	0	0	0	0	0	0
A:94(HIP)	0	0.01	-0.01	0	0	0	0	0	0
A:95(TRP)	0	0	0	0	0	0	0	0	0
A:96(ALA)	0	0	0	0	0	0	0	0	0
A:97(GLY)	0	0	0	0	0	0	0	0	0
A:98(ASP)	0	-0.02	0.02	0	0	0	0	0	0
A:99(TYR)	0	0	0	0	0	0	0	0	0
A:100(GLY)	0	0	0	0	0	0	0	0	0
A:101(GLY)	0	0	0.01	0	0	0	0	0	0
A:102(PRO)	-0.02	0	-0.02	0	0	0	0	0	0
A:103(LEU)	0	0	-0.01	0	0	0	0	0	0
A:104(PHE)	0.01	0	0.01	0	0	0	0	0	0
A:105(LEU)	0.01	0	0.01	0	0	0	0	0	0
A:106(LEU)	0	0	0	0	0	0	0	0	0
A:107(PRO)	0	0	0	0	0	0	0	0	0
A:108(GLY)	0	0	0	0	0	0	0	0	0
A:109(LEU)	0	0	0	0	0	0	0	0	0
A:110(LEU)	0	0	0	0	0	0	0	0	0
A:111(ILE)	0	0	0	0	0	0	0	0	0
A:112(THR)	0	0	0	0	0	0	0	0	0
A:113(CYS)	0	0	0	0	0	0	0	0	0
A:114(HIE)	0	0	-0.01	0	0	0	0	0	0
A:115(ILE)	0	0	0	0	0	0	0	0	0
A:116(SER)	0	0	0	0	0	0	0	0	0
A:117(HIS)	0	0	0	0	0	0	0	0	0
A:118(ILE)	0	0	0	0	0	0	0	0	0
A:119(SER)	0	0	0	0	0	0	0	0	0
A:120(LEU)	0	0	0	0	0	0	0	0	0
A:121(PRO)	0	0	0	0	0	0	0	0	0
A:122(ALA)	0	0	0	0	0	0	0	0	0
A:123(GLY)	0	0	0	0	0	0	0	0	0
A:124(TYR)	0	0	0	0	0	0	0	0	0
A:125(ARG)	0	0.03	-0.03	0	0	0	0	0	0
A:126(GLU)	0	-0.02	0.02	0	0	0	0	0	0
A:127(GLU)	0	-0.02	0.02	0	0	0	0	0	0
A:128(MET)	0	0	0	0	0	0	0	0	0
A:129(VAL)	0	0	0	0	0	0	0	0	0
A:130(ARG)	0	0.03	-0.03	0	0	0	0	0	0
A:131(TYR)	0.01	0	0.01	0	0	0	0	0	0
A:132(LEU)	0	0	0.01	0	0	0	0	0	0
A:133(ARG)	0	0.04	-0.03	0	0	0	0	0	0
A:134(SER)	0	0	0	0	0	0	0	0	0
A:135(VAL)	0	0	0	0	0	0	0	0	0
A:136(GLN)	0	0.01	-0.01	0	0	0	0	0	0
A:137(LEU)	0.01	0	0	0	0	0	0	0	0
A:138(PRO)	0	0	0	0	0	0	0	0	0
A:139(ASP)	0.01	-0.05	0.06	0	0	0	0	0	0
A:140(GLY)	0	0	0	0	0	0	0	0	0
A:141(GLY)	-0.01	0.01	-0.02	0	0	0	0	0	0
A:142(TRP)	0.01	-0.01	0.02	0	0	0	0	0	0
A:143(GLY)	-0.03	0.02	-0.04	0	0	0	0	0	0
A:144(LEU)	-0.06	0.02	-0.02	0	-0.04	0	-0.02	0	0
A:145(HIE)	0.01	-0.01	0.05	0	-0.03	0	0	0	0
A:146(ILE)	0	0	0.01	0	0	0	0	0	0
A:147(GLU)	0.02	-0.02	0.05	0	0	0	0	0	0
A:148(ASP)	0.05	-0.25	0.39	0	-0.05	-0.03	-0.01	0	0
A:149(LYS)	-0.01	0.17	-0.07	0	-0.11	0	0	0	0
A:150(SER)	0	-0.02	0.02	0	0	0	0	0	0
A:151(THR)	-0.02	0.03	-0.04	0	-0.01	0	0	0	0
A:152(VAL)	-0.01	0.02	-0.02	0	0	0	0	0	0
A:153(PHE)	0.03	0.02	0.01	0	-0.01	0	0	0	0
A:154(GLY)	0	0.01	-0.01	0	0	0	0	0	0
A:155(THR)	0	0.01	-0.01	0	0	0	0	0	0
A:156(ALA)	0	0.01	-0.01	0	0	0	0	0	0
A:157(LEU)	0	0.01	0	0	0	0	0	0	0
A:158(ASN)	0	0	0	0	0	0	0	0	0
A:159(TYR)	0	0.01	-0.01	0	0	0	0	0	0
A:160(VAL)	0	0.01	-0.01	0	0	0	0	0	0
A:161(ALA)	0	0	0	0	0	0	0	0	0
A:162(LEU)	0	0	0	0	0	0	0	0	0
A:163(ARG)	0	0.05	-0.05	0	0	0	0	0	0
A:164(ILE)	0	0	0	0	0	0	0	0	0
A:165(LEU)	0	0	0	0	0	0	0	0	0
A:166(GLY)	0	0	0	0	0	0	0	0	0
A:167(ILE)	0	0	0	0	0	0	0	0	0
A:168(GLY)	0	0	0	0	0	0	0	0	0
A:169(PRO)	0	0	0	0	0	0	0	0	0
A:170(ASP)	0	-0.02	0.02	0	0	0	0	0	0
A:171(ASP)	0	-0.03	0.03	0	0	0	0	0	0
A:172(PRO)	0	0	0	0	0	0	0	0	0
A:173(ASP)	0	-0.03	0.03	0	0	0	0	0	0
A:174(LEU)	0	0	0	0	0	0	0	0	0
A:175(VAL)	0	0	0	0	0	0	0	0	0
A:176(ARG)	0	0.04	-0.04	0	0	0	0	0	0
A:177(ALA)	0	0	0.01	0	0	0	0	0	0
A:178(ARG)	0	0.05	-0.04	0	0	0	0	0	0
A:179(ASN)	0	0	0	0	0	0	0	0	0
A:180(VAL)	0	0	0	0	0	0	0	0	0
A:181(LEU)	0.01	0	0.01	0	0	0	0	0	0
A:182(HIE)	0	0	0	0	0	0	0	0	0
A:183(LYS)	0	0.03	-0.03	0	0	0	0	0	0
A:184(LYS)	0	0.09	-0.08	0	0	0	0	0	0
A:185(GLY)	0	0	0.01	0	0	0	0	0	0
A:186(GLY)	0	-0.01	0	0	0	0	0	0	0
A:187(ALA)	0	-0.01	0.01	0	0	0	0	0	0
A:188(VAL)	0	-0.02	0.02	0	0	0	0	0	0
A:189(ALA)	-0.01	-0.01	0.01	0	0	0	0	0	0
A:190(ILE)	0.01	-0.01	0.02	0	0	0	0	0	0
A:191(PRO)	-0.02	0.04	-0.05	0	-0.01	0	0	0	0
A:192(SER)	-0.05	0.04	-0.08	0	-0.01	0	0	0	0
A:193(TRP)	0.06	0.01	0.05	0	-0.01	0	0	0	0
A:194(GLY)	-0.02	0.02	-0.04	0	0	0	0	0	0
A:195(LYS)	-0.1	0.21	-0.31	0	-0.01	0	0	0	0
A:196(PHE)	0.01	0.01	0	0	0	0	0	0	0
A:197(TRP)	0.02	0.01	0.01	0	0	0	0	0	0
A:198(LEU)	0	0.01	-0.01	0	0	0	0	0	0
A:199(ALA)	0	0.01	-0.01	0	0	0	0	0	0
A:200(VAL)	0	0.01	-0.01	0	0	0	0	0	0
A:201(LEU)	0	0.01	-0.01	0	0	0	0	0	0
A:202(ASN)	0	0	0	0	0	0	0	0	0
A:203(VAL)	0	0	0	0	0	0	0	0	0
A:204(TYR)	0.03	0	0.03	0	0	0	0	0	0
A:205(SER)	0.01	-0.01	0.03	0	0	0	0	0	0
A:206(TRP)	0.01	-0.01	0.02	0	0	0	0	0	0
A:207(GLU)	0.01	-0.08	0.09	0	0	0	0	0	0
A:208(GLY)	0	-0.02	0.02	0	0	0	0	0	0
A:209(LEU)	0	0.01	0	0	0	0	0	0	0
A:210(ASN)	0.04	0.01	0.05	0	-0.02	0	0	0	0
A:211(THR)	0	-0.01	0.02	0	0	0	0	0	0
A:212(LEU)	0.02	0	0.02	0	0	0	0	0	0
A:213(PHE)	0.01	0	0.01	0	0	0	0	0	0
A:214(PRO)	0	0	0	0	0	0	0	0	0
A:215(GLU)	0.01	-0.04	0.05	0	0	0	0	0	0
A:216(MET)	0	0.01	-0.01	0	0	0	0	0	0
A:217(TRP)	0.01	0.01	0	0	0	0	0	0	0
A:218(LEU)	0	0	0	0	0	0	0	0	0
A:219(PHE)	0	0	0	0	0	0	0	0	0
A:220(PRO)	0	0	0	0	0	0	0	0	0
A:221(GLU)	0	-0.02	0.02	0	0	0	0	0	0
A:222(TRP)	0	0	0	0	0	0	0	0	0
A:223(VAL)	0	0	0	0	0	0	0	0	0
A:224(PRO)	0	0	0.01	0	0	0	0	0	0
A:225(ALA)	0	-0.01	0.01	0	0	0	0	0	0
A:226(HIE)	0.01	-0.01	0.01	0	0	0	0	0	0
A:227(PRO)	0	0	0	0	0	0	0	0	0
A:228(SER)	0	0	0	0	0	0	0	0	0
A:229(THR)	0	0	0	0	0	0	0	0	0
A:230(LEU)	0	0.01	-0.01	0	0	0	0	0	0
A:231(TRP)	0.02	-0.01	0.03	0	0	0	0	0	0
A:232(CYS)	0	0	0.01	0	0	0	0	0	0
A:233(HIE)	0	-0.01	0.02	0	0	0	0	0	0
A:234(CYS)	0.01	0	0.01	0	0	0	0	0	0
A:235(ARG)	0	0.05	-0.05	0	0	0	0	0	0
A:236(GLN)	0	0	0	0	0	0	0	0	0
A:237(VAL)	-0.01	0	-0.01	0	0	0	0	0	0
A:238(TYR)	0.03	-0.01	0.04	0	0	0	0	0	0
A:239(LEU)	0	0	0.01	0	0	0	0	0	0
A:240(PRO)	0	0	0	0	0	0	0	0	0
A:241(MET)	0	0	0	0	0	0	0	0	0
A:242(SER)	0	0	0	0	0	0	0	0	0
A:243(TYR)	0	0	0	0	0	0	0	0	0
A:244(CYS)	0	0.01	-0.01	0	0	0	0	0	0
A:245(TYR)	0.01	-0.01	0.01	0	0	0	0	0	0
A:246(ALA)	0	0	0	0	0	0	0	0	0
A:247(THR)	0	0	0	0	0	0	0	0	0
A:248(ARG)	0	0.08	-0.08	0	0	0	0	0	0
A:249(LEU)	0	-0.01	0.01	0	0	0	0	0	0
A:250(SER)	0	0	-0.01	0	0	0	0	0	0
A:251(ALA)	0	0	0	0	0	0	0	0	0
A:252(SER)	0	0	0	0	0	0	0	0	0
A:253(GLU)	0	-0.03	0.03	0	0	0	0	0	0
A:254(ASP)	0	-0.03	0.03	0	0	0	0	0	0
A:255(PRO)	0	0	0	0	0	0	0	0	0
A:256(LEU)	0	0	0	0	0	0	0	0	0
A:257(VAL)	0	0	0	0	0	0	0	0	0
A:258(GLN)	0	0	0	0	0	0	0	0	0
A:259(SER)	0	0	0	0	0	0	0	0	0
A:260(LEU)	0	0	0	0	0	0	0	0	0
A:261(ARG)	0	0.06	-0.06	0	0	0	0	0	0
A:262(GLN)	0	0	0	0	0	0	0	0	0
A:263(GLU)	0	-0.03	0.03	0	0	0	0	0	0
A:264(LEU)	0	0	0.01	0	0	0	0	0	0
A:265(TYR)	0.01	0	0.01	0	0	0	0	0	0
A:266(VAL)	0	0	0	0	0	0	0	0	0
A:267(GLN)	0	0	0	0	0	0	0	0	0
A:268(ASP)	0	-0.03	0.03	0	0	0	0	0	0
A:269(TYR)	0	-0.01	0.01	0	0	0	0	0	0
A:270(ALA)	0	0	0	0	0	0	0	0	0
A:271(SER)	0	0	0	0	0	0	0	0	0
A:272(ILE)	0	0	0	0	0	0	0	0	0
A:273(ASP)	0.02	-0.06	0.08	0	0	0	0	0	0
A:274(TRP)	0.03	-0.02	0.05	0	0	0	0	0	0
A:275(PRO)	0	-0.05	0.08	0	-0.03	0	0	0	0
A:276(ALA)	-0.02	-0.01	0.03	0	-0.04	0	-0.01	0	0
A:277(GLN)	-0.01	-0.02	0.02	0	-0.01	0	0	0	0
A:278(ARG)	-0.15	0.23	-0.31	0	-0.07	0	0	0	0
A:279(ASN)	-0.43	-0.08	0.32	0	-0.54	-0.01	-0.12	0	0
A:280(ASN)	-0.02	-0.02	0.04	0	-0.04	0	0	0	0
A:281(VAL)	-0.01	-0.04	0.15	0	-0.11	0	-0.01	0	0
A:282(SER)	0.06	-0.07	0.2	0	-0.07	0	0	0	0
A:283(PRO)	-1.16	-0.18	0.52	0	-0.9	0	-0.59	0	0
A:284(ASP)	-0.13	-0.13	0.49	0	-0.4	0	-0.09	0	0
A:285(GLU)	-0.14	-0.13	0.14	0	-0.13	0	-0.02	0	0
A:286(MET)	-1.56	-0.08	0.23	0	-1.02	0	-0.69	0	0
A:287(TYR)	-1.24	-0.44	0.37	0	-0.69	-0.05	-0.43	0	0
A:288(THR)	-0.28	-0.28	0.48	0	-0.44	0	-0.05	0	0
A:289(PRO)	-1.46	0.01	-0.29	0	-0.73	0	-0.45	0	0
A:290(HIE)	-1.08	-0.14	0.8	0	-1.3	0	-0.44	0	0
A:291(SER)	-0.35	-0.1	0.27	0	-0.4	0	-0.11	0	0
A:292(TRP)	-1.94	-0.22	0.63	0	-1.19	0	-1.17	0	0
A:293(LEU)	-0.02	-0.01	0.05	0	-0.06	0	0	0	0
A:294(LEU)	-0.09	0.03	-0.04	0	-0.08	0	0	0	0
A:295(HIS)	-1.5	-0.01	0.37	0	-1.18	0	-0.68	0	0
A:296(VAL)	-0.68	0	0.04	0	-0.43	0	-0.29	0	0
A:297(VAL)	-0.05	0.02	-0.02	0	-0.05	0	0	0	0
A:298(TYR)	-0.05	0.04	-0.03	0	-0.05	0	0	0	0
A:299(GLY)	-0.41	0.03	-0.04	0	-0.29	0	-0.11	0	0
A:300(LEU)	-0.27	-0.02	0.06	0	-0.21	0	-0.1	0	0
A:301(LEU)	-0.01	0.03	-0.02	0	-0.02	0	0	0	0
A:302(ASN)	-0.04	0.05	-0.04	0	-0.04	0	0	0	0
A:303(LEU)	-0.2	-0.02	0.01	0	-0.13	0	-0.07	0	0
A:304(TYR)	-0.01	0	-0.01	0	0	0	0	0	0
A:305(GLU)	0.01	-0.06	0.07	0	0	0	0	0	0
A:306(ARG)	0	0.06	-0.06	0	-0.01	0	0	0	0
A:307(PHE)	0	0	0	0	0	0	0	0	0
A:308(HIS)	0	0.01	0	0	0	0	0	0	0
A:309(SER)	0	0	0	0	0	0	0	0	0
A:310(THR)	0	0	0	0	0	0	0	0	0
A:311(SER)	0	0	0	0	0	0	0	0	0
A:312(LEU)	0	0	0	0	0	0	0	0	0
A:313(ARG)	0	0.07	-0.07	0	0	0	0	0	0
A:314(LYS)	0	0.02	-0.02	0	0	0	0	0	0
A:315(TRP)	0	0	0	0	0	0	0	0	0
A:316(ALA)	0	0	0	0	0	0	0	0	0
A:317(VAL)	0	0	0	0	0	0	0	0	0
A:318(GLN)	0	0	0	0	0	0	0	0	0
A:319(MET)	0	0	0	0	0	0	0	0	0
A:320(LEU)	0	0	0	0	0	0	0	0	0
A:321(TYR)	0	0	0	0	0	0	0	0	0
A:322(GLU)	0	-0.02	0.02	0	0	0	0	0	0
A:323(HIS)	0	0	0	0	0	0	0	0	0
A:324(ILE)	0	0	0	0	0	0	0	0	0
A:325(ALA)	0	0	0	0	0	0	0	0	0
A:326(ALA)	0	0	0	0	0	0	0	0	0
A:327(ASP)	0	-0.03	0.04	0	0	0	0	0	0
A:328(ASP)	0	-0.03	0.03	0	0	0	0	0	0
A:329(CYS)	0	0	0	0	0	0	0	0	0
A:330(PHE)	0	0	0	0	0	0	0	0	0
A:331(THR)	0	0	0	0	0	0	0	0	0
A:332(LYS)	0	0.02	-0.02	0	0	0	0	0	0
A:333(CYS)	0	0	0	0	0	0	0	0	0
A:334(ILE)	0	0	0	0	0	0	0	0	0
A:335(SER)	0	0	0	0	0	0	0	0	0
A:336(ILE)	0	0	0	0	0	0	0	0	0
A:337(GLY)	0	0	0	0	0	0	0	0	0
A:338(PRO)	0	0	0	0	0	0	0	0	0
A:339(ILE)	0	0	0	0	0	0	0	0	0
A:340(SER)	0	0	0.01	0	0	0	0	0	0
A:341(LYS)	0	0.03	-0.03	0	0	0	0	0	0
A:342(THR)	0	0	-0.01	0	0	0	0	0	0
A:343(ILE)	0	0	0	0	0	0	0	0	0
A:344(ASN)	0	0	0.01	0	0	0	0	0	0
A:345(MET)	0	0	0	0	0	0	0	0	0
A:346(LEU)	0	0	0	0	0	0	0	0	0
A:347(VAL)	0	0	0	0	0	0	0	0	0
A:348(ARG)	0	0.04	-0.04	0	0	0	0	0	0
A:349(TRP)	0	0	0	0	0	0	0	0	0
A:350(SER)	0	0	0	0	0	0	0	0	0
A:351(VAL)	0	0	0	0	0	0	0	0	0
A:352(ASP)	0	-0.02	0.02	0	0	0	0	0	0
A:353(GLY)	0	0	0	0	0	0	0	0	0
A:354(PRO)	0	0	0	0	0	0	0	0	0
A:355(SER)	0	0	0	0	0	0	0	0	0
A:356(SER)	0	0	0	0	0	0	0	0	0
A:357(PRO)	0	0	0	0	0	0	0	0	0
A:358(ALA)	0	0	0	0	0	0	0	0	0
A:359(PHE)	0	0	0	0	0	0	0	0	0
A:360(GLN)	0	0	0	0	0	0	0	0	0
A:361(GLU)	0	-0.02	0.02	0	0	0	0	0	0
A:362(HIE)	0	0	0	0	0	0	0	0	0
A:363(VAL)	0	0	0	0	0	0	0	0	0
A:364(SER)	0	0	0	0	0	0	0	0	0
A:365(ARG)	0	0.03	-0.03	0	0	0	0	0	0
A:366(ILE)	0	0	0	0	0	0	0	0	0
A:367(LYS)	0	0.02	-0.02	0	0	0	0	0	0
A:368(ASP)	0	-0.02	0.02	0	0	0	0	0	0
A:369(TYR)	0	0	0	0	0	0	0	0	0
A:370(LEU)	0	0	0	0	0	0	0	0	0
A:371(TRP)	0	0	0.01	0	0	0	0	0	0
A:372(LEU)	0	0	0	0	0	0	0	0	0
A:373(GLY)	0	0	0	0	0	0	0	0	0
A:374(LEU)	0	0	0	0	0	0	0	0	0
A:375(ASP)	0	-0.03	0.03	0	0	0	0	0	0
A:376(GLY)	0	0	0	0	0	0	0	0	0
A:377(MET)	0	0	0	0	0	0	0	0	0
A:378(LYS)	0	0.03	-0.03	0	0	0	0	0	0
A:379(MET)	0	0	0	0	0	0	0	0	0
A:380(GLN)	0	0	0	0	0	0	0	0	0
A:381(GLY)	0	0	0	0	0	0	0	0	0
A:382(THR)	0	0	0	0	0	0	0	0	0
A:383(ASN)	0	0	0	0	0	0	0	0	0
A:384(GLY)	0	0	0	0	0	0	0	0	0
A:385(SER)	0	0	0	0	0	0	0	0	0
A:386(GLN)	0	0	0	0	0	0	0	0	0
A:387(ILE)	0	0	0	0	0	0	0	0	0
A:388(TRP)	0	0	0	0	0	0	0	0	0
A:389(ASP)	0	-0.01	0.01	0	0	0	0	0	0
A:390(THR)	0	0	0	0	0	0	0	0	0
A:391(SER)	0	0	0	0	0	0	0	0	0
A:392(PHE)	0	0	0	0	0	0	0	0	0
A:393(ALA)	0	0	0	0	0	0	0	0	0
A:394(ILE)	0	0	0	0	0	0	0	0	0
A:395(GLN)	0	0	0	0	0	0	0	0	0
A:396(ALA)	0	0	0	0	0	0	0	0	0
A:397(LEU)	0	0	0	0	0	0	0	0	0
A:398(LEU)	0	0	0	0	0	0	0	0	0
A:399(GLU)	0	0	0	0	0	0	0	0	0
A:400(ALA)	0	0	0	0	0	0	0	0	0
A:401(GLY)	0	0	0	0	0	0	0	0	0
A:402(ALA)	0	0	0	0	0	0	0	0	0
A:403(HIE)	0	0	0	0	0	0	0	0	0
A:404(HIS)	0	0	0	0	0	0	0	0	0
A:405(ARG)	0	0	0	0	0	0	0	0	0
A:406(PRO)	0	0	0	0	0	0	0	0	0
A:407(GLU)	0	0	0	0	0	0	0	0	0
A:408(PHE)	0	0	0	0	0	0	0	0	0
A:409(LEU)	0	0	0	0	0	0	0	0	0
A:410(PRO)	0	0	0	0	0	0	0	0	0
A:411(CYS)	0	0	0	0	0	0	0	0	0
A:412(LEU)	0	0	0	0	0	0	0	0	0
A:413(GLN)	0	0	0	0	0	0	0	0	0
A:414(LYS)	0	0.01	-0.01	0	0	0	0	0	0
A:415(ALA)	0	0	0	0	0	0	0	0	0
A:416(HIE)	0	0	0	0	0	0	0	0	0
A:417(GLU)	0	-0.01	0.01	0	0	0	0	0	0
A:418(PHE)	0	0	0	0	0	0	0	0	0
A:419(LEU)	0	0	0	0	0	0	0	0	0
A:420(ARG)	0	0.01	-0.01	0	0	0	0	0	0
A:421(LEU)	0	0	0	0	0	0	0	0	0
A:422(SER)	0	0	0	0	0	0	0	0	0
A:423(GLN)	0	0	0	0	0	0	0	0	0
A:424(VAL)	0	0	0	0	0	0	0	0	0
A:425(PRO)	0	0	0	0	0	0	0	0	0
A:426(GLU)	0	-0.01	0.01	0	0	0	0	0	0
A:427(ASN)	0	0	0	0	0	0	0	0	0
A:428(CYS)	0	0	0	0	0	0	0	0	0
A:429(PRO)	0	0	0	0	0	0	0	0	0
A:430(ASP)	0	-0.02	0.02	0	0	0	0	0	0
A:431(TYR)	0	0	0	0	0	0	0	0	0
A:432(GLN)	0	0	0	0	0	0	0	0	0
A:433(LYS)	0	0.02	-0.02	0	0	0	0	0	0
A:434(TYR)	0	0	0	0	0	0	0	0	0
A:435(TYR)	0	0	0	0	0	0	0	0	0
A:436(ARG)	0	0.04	-0.04	0	0	0	0	0	0
A:437(HIE)	0	0	0	0	0	0	0	0	0
A:438(MET)	0	0	0	0	0	0	0	0	0
A:439(ARG)	0	0.03	-0.03	0	0	0	0	0	0
A:440(LYS)	0	0.01	-0.01	0	0	0	0	0	0
A:441(GLY)	0	0	0	0	0	0	0	0	0
A:442(GLY)	0	0	0	0	0	0	0	0	0
A:443(PHE)	0	0	0	0	0	0	0	0	0
A:444(SER)	0	0	0	0	0	0	0	0	0
A:445(PHE)	0	0	0	0	0	0	0	0	0
A:446(SER)	0	0	0	0	0	0	0	0	0
A:447(THR)	0	0	0	0	0	0	0	0	0
A:448(LEU)	0	0	0	0	0	0	0	0	0
A:449(ASP)	0	-0.02	0.02	0	0	0	0	0	0
A:450(CYS)	0	0	0	0	0	0	0	0	0
A:451(GLY)	0	0	0	0	0	0	0	0	0
A:452(TRP)	0	0	0	0	0	0	0	0	0
A:453(ILE)	0	0	0	0	0	0	0	0	0
A:454(VAL)	0	0	0	0	0	0	0	0	0
A:455(ALA)	0	0	0	0	0	0	0	0	0
A:456(ASP)	0	-0.01	0.01	0	0	0	0	0	0
A:457(CYS)	0	0	0	0	0	0	0	0	0
A:458(THR)	0	0	0	0	0	0	0	0	0
A:459(ALA)	0	0	0	0	0	0	0	0	0
A:460(GLU)	0	0	0	0	0	0	0	0	0
A:461(GLY)	0	0	0	0	0	0	0	0	0
A:462(LEU)	0	0	0	0	0	0	0	0	0
A:463(LYS)	0	0	0	0	0	0	0	0	0
A:464(ALA)	0	0	0	0	0	0	0	0	0
A:465(VAL)	0	0	0	0	0	0	0	0	0
A:466(LEU)	0	0	0	0	0	0	0	0	0
A:467(LEU)	0	0	0	0	0	0	0	0	0
A:468(LEU)	0	0	0	0	0	0	0	0	0
A:469(GLN)	0	0	0	0	0	0	0	0	0
A:470(ASN)	0	0	0	0	0	0	0	0	0
A:471(GLN)	0	0	0	0	0	0	0	0	0
A:472(CYS)	0	0	0	0	0	0	0	0	0
A:473(PRO)	0	0	0	0	0	0	0	0	0
A:474(SER)	0	0	0	0	0	0	0	0	0
A:475(ILE)	0	0	0	0	0	0	0	0	0
A:476(THR)	0	0	0	0	0	0	0	0	0
A:477(GLU)	0	-0.01	0.01	0	0	0	0	0	0
A:478(HIE)	0	0	0	0	0	0	0	0	0
A:479(ILE)	0	0	0	0	0	0	0	0	0
A:480(PRO)	0	0	0	0	0	0	0	0	0
A:481(ARG)	0	0	-0.01	0	0	0	0	0	0
A:482(GLU)	0	-0.01	0.01	0	0	0	0	0	0
A:483(ARG)	0	0.01	-0.01	0	0	0	0	0	0
A:484(LEU)	0	0	0	0	0	0	0	0	0
A:485(CYS)	0	0	0	0	0	0	0	0	0
A:486(ASP)	0	-0.01	0.01	0	0	0	0	0	0
A:487(ALA)	0	0	0	0	0	0	0	0	0
A:488(VAL)	0	0	0	0	0	0	0	0	0
A:489(ASP)	0	-0.01	0.01	0	0	0	0	0	0
A:490(VAL)	0	0	0	0	0	0	0	0	0
A:491(LEU)	0	0	0	0	0	0	0	0	0
A:492(LEU)	0	0	0	0	0	0	0	0	0
A:493(SER)	0	0	0	0	0	0	0	0	0
A:494(LEU)	0	0	0	0	0	0	0	0	0
A:495(ARG)	0	0	0	0	0	0	0	0	0
A:496(ASN)	0	0	0	0	0	0	0	0	0
A:497(ALA)	0	0	0	0	0	0	0	0	0
A:498(ASP)	0	0.01	-0.01	0	0	0	0	0	0
A:499(GLY)	0	0	0	0	0	0	0	0	0
A:500(GLY)	0	0	0	0	0	0	0	0	0
A:501(PHE)	0	0	0	0	0	0	0	0	0
A:502(ALA)	0	0	0	0	0	0	0	0	0
A:503(THR)	0	0	0	0	0	0	0	0	0
A:504(TYR)	0	0	0	0	0	0	0	0	0
A:505(GLU)	0	-0.03	0.03	0	0	0	0	0	0
A:506(LYS)	0	0.01	-0.01	0	0	0	0	0	0
A:507(LYS)	0	0	-0.01	0	0	0	0	0	0
A:508(ARG)	0	0.04	-0.04	0	0	0	0	0	0
A:509(GLY)	0	0	0	0	0	0	0	0	0
A:510(GLY)	0	-0.01	0.02	0	0	0	0	0	0
A:511(TYR)	0	-0.01	0.02	0	0	0	0	0	0
A:512(LEU)	0	-0.02	0.02	0	-0.01	0	0	0	0
A:513(LEU)	0	-0.02	0.02	0	0	0	0	0	0
A:514(GLU)	0.11	-0.16	0.28	0	-0.02	0	0	0	0
A:515(LEU)	-0.02	-0.03	0.07	0	-0.05	0	0	0	0
A:516(LEU)	-0.04	0	-0.03	0	-0.01	0	0	0	0
A:517(ASN)	0.02	-0.03	0.07	0	-0.01	0	0	0	0
A:518(PRO)	-0.03	-0.01	-0.01	0	-0.01	0	0	0	0
A:519(SER)	-0.01	-0.02	0.02	0	-0.01	0	0	0	0
A:520(GLU)	0.28	-0.41	0.78	0	-0.09	0	0	0	0
A:521(VAL)	0.05	-0.01	0.1	0	-0.03	0	0	0	0
A:522(PHE)	0.06	0.01	0.07	0	-0.01	0	0	0	0
A:523(GLY)	-0.02	0.03	-0.03	0	-0.01	0	0	0	0
A:524(ASP)	0.09	-0.05	0.17	0	-0.02	0	0	0	0
A:525(ILE)	0.02	0.01	0.02	0	0	0	0	0	0
A:526(MET)	0.01	0	0.01	0	0	0	0	0	0
A:527(ILE)	0.02	-0.01	0.02	0	0	0	0	0	0
A:528(ASP)	0.01	-0.02	0.03	0	0	0	0	0	0
A:529(TYR)	0.01	0.01	0	0	0	0	0	0	0
A:530(THR)	0	0.01	0	0	0	0	0	0	0
A:531(TYR)	0.01	0	0.01	0	0	0	0	0	0
A:532(VAL)	0	0	0	0	0	0	0	0	0
A:533(GLU)	0.02	0.01	0.01	0	0	0	0	0	0
A:534(CYS)	0	0	0	0	0	0	0	0	0
A:535(THR)	0	0	0	0	0	0	0	0	0
A:536(SER)	0	0	0	0	0	0	0	0	0
A:537(ALA)	0	0	0	0	0	0	0	0	0
A:538(VAL)	0	0	0	0	0	0	0	0	0
A:539(MET)	0	0	0	0	0	0	0	0	0
A:540(GLN)	0	0	0	0	0	0	0	0	0
A:541(ALA)	0	0	0	0	0	0	0	0	0
A:542(LEU)	0	0	0	0	0	0	0	0	0
A:543(LYS)	0	0	0	0	0	0	0	0	0
A:544(HIS)	0	0	0	0	0	0	0	0	0
A:545(PHE)	0	0	0	0	0	0	0	0	0
A:546(HIE)	0	0	0	0	0	0	0	0	0
A:547(GLU)	0	0	0	0	0	0	0	0	0
A:548(HIS)	0	0	0	0	0	0	0	0	0
A:549(PHE)	0	0	0	0	0	0	0	0	0
A:550(PRO)	0	0	0	0	0	0	0	0	0
A:551(ASP)	0	0	0	0	0	0	0	0	0
A:552(TYR)	0	0	0	0	0	0	0	0	0
A:553(ARG)	0	0.01	0	0	0	0	0	0	0
A:554(ALA)	0	0	0	0	0	0	0	0	0
A:555(ALA)	0	0	0	0	0	0	0	0	0
A:556(GLU)	0	0	0	0	0	0	0	0	0
A:557(VAL)	0	0	0	0	0	0	0	0	0
A:558(ARG)	0	0	0	0	0	0	0	0	0
A:559(GLU)	0	0	0	0	0	0	0	0	0
A:560(THR)	0	0	0	0	0	0	0	0	0
A:561(LEU)	0	0	0	0	0	0	0	0	0
A:562(ASN)	0	0	0	0	0	0	0	0	0
A:563(GLN)	0	0	0	0	0	0	0	0	0
A:564(GLY)	0	0	0	0	0	0	0	0	0
A:565(LEU)	0	0	0	0	0	0	0	0	0
A:566(ASP)	0	0.01	-0.01	0	0	0	0	0	0
A:567(PHE)	0	0	0	0	0	0	0	0	0
A:568(CYS)	0	0	0	0	0	0	0	0	0
A:569(ARG)	0	-0.02	0.01	0	0	0	0	0	0
A:570(ARG)	0	-0.02	0.02	0	0	0	0	0	0
A:571(LYS)	0	-0.02	0.02	0	0	0	0	0	0
A:572(GLN)	0	0	0	0	0	0	0	0	0
A:573(ARG)	0	-0.08	0.08	0	0	0	0	0	0
A:574(ALA)	0	0	0	0	0	0	0	0	0
A:575(ASP)	0.01	0.03	-0.03	0	0	0	0	0	0
A:576(GLY)	0	0	0	0	0	0	0	0	0
A:577(SER)	0	0	-0.01	0	0	0	0	0	0
A:578(TRP)	0	0	0	0	0	0	0	0	0
A:579(GLU)	0.02	0.06	-0.04	0	0	0	0	0	0
A:580(GLY)	0.01	0.01	0	0	0	0	0	0	0
A:581(SER)	0.01	0	0.01	0	0	0	0	0	0
A:582(TRP)	0.01	0	0.01	0	0	0	0	0	0
A:583(GLY)	0	0	0	0	0	0	0	0	0
A:584(VAL)	0	0	0	0	0	0	0	0	0
A:585(CYS)	0	0	0	0	0	0	0	0	0
A:586(PHE)	0.01	0	0.01	0	0	0	0	0	0
A:587(THR)	0	0	0	0	0	0	0	0	0
A:588(TYR)	0	0	0.01	0	0	0	0	0	0
A:589(GLY)	0	0	0	0	0	0	0	0	0
A:590(THR)	0	0	0	0	0	0	0	0	0
A:591(TRP)	0	0	0	0	0	0	0	0	0
A:592(PHE)	0	0	0	0	0	0	0	0	0
A:593(GLY)	0	0	0	0	0	0	0	0	0
A:594(LEU)	0	0	0	0	0	0	0	0	0
A:595(GLU)	0	0	0	0	0	0	0	0	0
A:596(ALA)	0	0	0	0	0	0	0	0	0
A:597(PHE)	0	0	0	0	0	0	0	0	0
A:598(ALA)	0	0	0	0	0	0	0	0	0
A:599(CYS)	0	0	0	0	0	0	0	0	0
A:600(MET)	0	0	0	0	0	0	0	0	0
A:601(GLY)	0	0	0	0	0	0	0	0	0
A:602(HIS)	0	0	0	0	0	0	0	0	0
A:603(THR)	0	0	0	0	0	0	0	0	0
A:604(TYR)	0	0	0	0	0	0	0	0	0
A:605(GLN)	0	0	0	0	0	0	0	0	0
A:606(ASP)	0	0.01	-0.01	0	0	0	0	0	0
A:607(GLY)	0	0	0	0	0	0	0	0	0
A:608(ALA)	0	0	0	0	0	0	0	0	0
A:609(ALA)	0	0	0	0	0	0	0	0	0
A:610(CYS)	0	0	0	0	0	0	0	0	0
A:611(ALA)	0	0	0	0	0	0	0	0	0
A:612(GLU)	0	0.01	-0.01	0	0	0	0	0	0
A:613(VAL)	0	0	0	0	0	0	0	0	0
A:614(ALA)	0	0	0	0	0	0	0	0	0
A:615(GLN)	0	0	0	0	0	0	0	0	0
A:616(ALA)	0	0	0	0	0	0	0	0	0
A:617(CYS)	0	0	0	0	0	0	0	0	0
A:618(ASN)	0	0	0	0	0	0	0	0	0
A:619(PHE)	0	0	0	0	0	0	0	0	0
A:620(LEU)	0	0	0	0	0	0	0	0	0
A:621(LEU)	0	0	0	0	0	0	0	0	0
A:622(SER)	0	0	0	0	0	0	0	0	0
A:623(GLN)	0	0	0	0	0	0	0	0	0
A:624(GLN)	0	0	0	0	0	0	0	0	0
A:625(MET)	0	0	0	0	0	0	0	0	0
A:626(ALA)	0	0	0	0	0	0	0	0	0
A:627(ASP)	0	0	0	0	0	0	0	0	0
A:628(GLY)	0	0	0	0	0	0	0	0	0
A:629(GLY)	0	0	0	0	0	0	0	0	0
A:630(TRP)	0	0	0	0	0	0	0	0	0
A:631(GLY)	0	0	0	0	0	0	0	0	0
A:632(GLU)	0.02	0.02	0	0	0	0	0	0	0
A:633(ASP)	0.01	0.01	0	0	0	0	0	0	0
A:634(PHE)	0.04	0.02	0.05	0	-0.02	0	0	0	0
A:635(GLU)	0.05	0.02	0.05	0	-0.02	0	0	0	0
A:636(SER)	0	0.01	0	0	-0.01	0	0	0	0
A:637(CYS)	-0.13	-0.02	-0.02	0	-0.07	0	-0.01	0	0
A:638(GLU)	-0.23	0	0.35	0	-0.41	0	-0.18	0	0
A:639(GLN)	-0.13	0.03	0.01	0	-0.13	0	-0.04	0	0
A:640(ARG)	-0.34	-0.39	0.3	0	-0.18	-0.02	-0.05	0	0
A:641(ARG)	0.03	-0.11	0.17	0	-0.04	0	0	0	0
A:642(TYR)	0	0	0	0	0	0	0	0	0
A:643(VAL)	0.01	0	0.01	0	0	0	0	0	0
A:644(GLN)	0	0	0	0	0	0	0	0	0
A:645(SER)	0	0	0	0	0	0	0	0	0
A:646(ALA)	0	0	0	0	0	0	0	0	0
A:647(ARG)	0	0	0	0	0	0	0	0	0
A:648(SER)	0	0	0	0	0	0	0	0	0
A:649(GLN)	0	0	0	0	0	0	0	0	0
A:650(VAL)	0	0	0	0	0	0	0	0	0
A:651(HIE)	0	0	0	0	0	0	0	0	0
A:652(SER)	0	0	0	0	0	0	0	0	0
A:653(THR)	0	0	0	0	0	0	0	0	0
A:654(CYS)	0	0	0	0	0	0	0	0	0
A:655(TRP)	0	0	0	0	0	0	0	0	0
A:656(ALA)	0	0	0	0	0	0	0	0	0
A:657(LEU)	0	0	0	0	0	0	0	0	0
A:658(MET)	0	0	0	0	0	0	0	0	0
A:659(GLY)	0	0	0	0	0	0	0	0	0
A:660(LEU)	0	0	0	0	0	0	0	0	0
A:661(MET)	0	0	0	0	0	0	0	0	0
A:662(ALA)	0	0	0	0	0	0	0	0	0
A:663(VAL)	0	0	0	0	0	0	0	0	0
A:664(ARG)	0	-0.01	0	0	0	0	0	0	0
A:665(HIS)	0	0	0	0	0	0	0	0	0
A:666(PRO)	0	0	0	0	0	0	0	0	0
A:667(ASP)	0	0.01	-0.01	0	0	0	0	0	0
A:668(ILE)	0	0	0	0	0	0	0	0	0
A:669(THR)	0	0	0	0	0	0	0	0	0
A:670(ALA)	0	0	0	0	0	0	0	0	0
A:671(GLN)	0	0	0	0	0	0	0	0	0
A:672(GLU)	0	0	0	0	0	0	0	0	0
A:673(ARG)	0	-0.01	0.01	0	0	0	0	0	0
A:674(GLY)	0	0	0	0	0	0	0	0	0
A:675(ILE)	0	0	0	0	0	0	0	0	0
A:676(ARG)	0	0	0	0	0	0	0	0	0
A:677(CYS)	0	0	0	0	0	0	0	0	0
A:678(LEU)	0	0	0	0	0	0	0	0	0
A:679(LEU)	0	0	0	0	0	0	0	0	0
A:680(GLY)	0	0	0	0	0	0	0	0	0
A:681(LYS)	0	0	0	0	0	0	0	0	0
A:682(GLN)	0	0	0	0	0	0	0	0	0
A:683(LEU)	0	0	0	0	0	0	0	0	0
A:684(PRO)	0	0	0	0	0	0	0	0	0
A:685(ASN)	0	0	0	0	0	0	0	0	0
A:686(GLY)	0	0	0	0	0	0	0	0	0
A:687(ASP)	0	-0.01	0.01	0	0	0	0	0	0
A:688(TRP)	0	0	0	0	0	0	0	0	0
A:689(PRO)	0	0	0	0	0	0	0	0	0
A:690(GLN)	0	0	0	0	0	0	0	0	0
A:691(GLU)	0	0	0	0	0	0	0	0	0
A:692(ASN)	0	0	0	0	0	0	0	0	0
A:693(ILE)	0	0	0	0	0	0	0	0	0
A:694(SER)	0	0	0	0	0	0	0	0	0
A:695(GLY)	0	0	0	0	0	0	0	0	0
A:696(VAL)	0	0	0	0	0	0	0	0	0
A:697(PHE)	0.02	0	0.02	0	0	0	0	0	0
A:698(ASN)	-0.01	0.01	-0.01	0	0	0	0	0	0
A:699(LYS)	-0.06	-0.03	-0.01	0	-0.02	0	0	0	0
A:700(SER)	-0.02	0.04	-0.03	0	-0.03	0	0	0	0
A:701(CYS)	0	-0.01	0.02	0	0	0	0	0	0
A:702(ALA)	0	0	0	0	0	0	0	0	0
A:703(ILE)	0.02	0	0.02	0	0	0	0	0	0
A:704(SER)	0	0	0	0	0	0	0	0	0
A:705(TYR)	0.01	0	0.01	0	0	0	0	0	0
A:706(THR)	0	0	0	0	0	0	0	0	0
A:707(SER)	0	0	0	0	0	0	0	0	0
A:708(TYR)	0	0	0.01	0	0	0	0	0	0
A:709(ARG)	0	0.01	-0.01	0	0	0	0	0	0
A:710(ASN)	0	0	0	0	0	0	0	0	0
A:711(ILE)	0	0	0	0	0	0	0	0	0
A:712(PHE)	0	0	0	0	0	0	0	0	0
A:713(PRO)	0	0	0	0	0	0	0	0	0
A:714(ILE)	0	0	0	0	0	0	0	0	0
A:715(TRP)	0	0	0	0	0	0	0	0	0
A:716(ALA)	0	0	0	0	0	0	0	0	0
A:717(LEU)	0	0	0	0	0	0	0	0	0
A:718(GLY)	0	0	0	0	0	0	0	0	0
A:719(ARG)	0	0	0	0	0	0	0	0	0
A:720(PHE)	0	0	0	0	0	0	0	0	0
A:721(SER)	0	0	0	0	0	0	0	0	0
A:722(ASN)	0	0	0	0	0	0	0	0	0
A:723(LEU)	0	0	0	0	0	0	0	0	0
A:724(TYR)	0	0	0	0	0	0	0	0	0
A:725(PRO)	0	0	0	0	0	0	0	0	0
A:726(ASP)	0	0	0	0	0	0	0	0	0
A:727(ASN)	0	0	0	0	0	0	0	0	0
A:728(THR)	0	0	0	0	0	0	0	0	0
A:729(LEU)	0	0	0	0	0	0	0	0	0
A:730(ALA)	0	0	0	0	0	0	0	0	0
A:731(GLY)	0	0	0	0	0	0	0	0	0
A:732(HIE)	0	0	0	0	0	0	0	0	0
A:733(ILE)	0	0	0	0	0	0	0	0	0

## Sheet: P4HB
Res	dGbind	Coulomb	Solvation	Covalent	vdW	H-bond	Lipo	Pi-Pi	Contact
_:0(*)	-30.02	-8.68	8.89	0	-23.36	-0.54	-8.85	0	0
_:1(NA)	0	0	0	0	0	0	0	0	0
_:2(NA)	0	0	0	0	0	0	0	0	0
_:3(NA)	0	0.01	-0.01	0	0	0	0	0	0
_:4(NA)	0	0	0	0	0	0	0	0	0
_:5(NA)	0	0	0	0	0	0	0	0	0
_:6(NA)	0	0	0	0	0	0	0	0	0
_:7(NA)	0	0	0	0	0	0	0	0	0
_:8(NA)	0	0	0	0	0	0	0	0	0
_:9(NA)	0	0	0	0	0	0	0	0	0
_:10(NA)	0	0	0	0	0	0	0	0	0
_:11(NA)	0	0	0	0	0	0	0	0	0
_:12(NA)	0	0	0	0	0	0	0	0	0
_:13(NA)	0	0	0	0	0	0	0	0	0
_:14(NA)	0	0	0	0	0	0	0	0	0
_:15(NA)	0	0	0	0	0	0	0	0	0
_:16(NA)	0	0	0	0	0	0	0	0	0
_:17(NA)	0	0.01	0	0	0	0	0	0	0
_:18(NA)	0	0.01	-0.01	0	0	0	0	0	0
_:19(NA)	0	0	0	0	0	0	0	0	0
_:20(NA)	0	0	0	0	0	0	0	0	0
_:21(NA)	0	0	0	0	0	0	0	0	0
_:22(NA)	0	0	0	0	0	0	0	0	0
_:23(NA)	0	0	0	0	0	0	0	0	0
_:24(NA)	0	0	0	0	0	0	0	0	0
_:25(NA)	0	0	0	0	0	0	0	0	0
_:26(NA)	0	0	0	0	0	0	0	0	0
_:27(NA)	0	0	0	0	0	0	0	0	0
_:28(NA)	0	0	0	0	0	0	0	0	0
_:29(NA)	0	0	0	0	0	0	0	0	0
_:30(NA)	0	0.01	-0.01	0	0	0	0	0	0
_:31(NA)	0	0.01	0	0	0	0	0	0	0
_:32(NA)	0	0.01	-0.01	0	0	0	0	0	0
_:33(NA)	0	0	0	0	0	0	0	0	0
_:34(NA)	0	0	0	0	0	0	0	0	0
_:35(NA)	0	0	0	0	0	0	0	0	0
_:36(NA)	0	0	0	0	0	0	0	0	0
_:37(NA)	0	0	0	0	0	0	0	0	0
_:38(NA)	0	0	0	0	0	0	0	0	0
_:39(NA)	0	0	0	0	0	0	0	0	0
_:40(NA)	0	0	0	0	0	0	0	0	0
_:41(NA)	0	0	0	0	0	0	0	0	0
_:42(NA)	0	0	0	0	0	0	0	0	0
_:43(NA)	0	0	0	0	0	0	0	0	0
_:44(NA)	0	0	0	0	0	0	0	0	0
_:45(NA)	0	0	0	0	0	0	0	0	0
_:46(NA)	0	0	0	0	0	0	0	0	0
_:47(NA)	0	0	0	0	0	0	0	0	0
_:48(NA)	0	0	0	0	0	0	0	0	0
_:49(NA)	0	0	0	0	0	0	0	0	0
_:50(NA)	0	0.01	0	0	0	0	0	0	0
_:51(NA)	0	0	0	0	0	0	0	0	0
_:52(NA)	0	0	0	0	0	0	0	0	0
_:53(NA)	0	0	0	0	0	0	0	0	0
_:54(NA)	0	0	0	0	0	0	0	0	0
_:55(NA)	0	0	0	0	0	0	0	0	0
_:56(NA)	0	0	0	0	0	0	0	0	0
_:57(NA)	0	0	0	0	0	0	0	0	0
_:58(NA)	0	-0.01	0.01	0	0	0	0	0	0
_:59(NA)	0	0	0	0	0	0	0	0	0
_:60(NA)	0	0	0	0	0	0	0	0	0
_:61(NA)	0	0.01	0	0	0	0	0	0	0
_:62(NA)	0	0	0	0	0	0	0	0	0
_:63(NA)	0	0	0	0	0	0	0	0	0
_:64(NA)	0	0	0	0	0	0	0	0	0
_:65(NA)	0	0.01	-0.01	0	0	0	0	0	0
_:66(NA)	0	0	0	0	0	0	0	0	0
_:67(NA)	0	0	0	0	0	0	0	0	0
_:68(NA)	0	0	0	0	0	0	0	0	0
_:69(NA)	0	0	0.01	0	0	0	0	0	0
_:70(NA)	0	0.01	-0.01	0	0	0	0	0	0
_:71(NA)	0	0	0	0	0	0	0	0	0
_:72(NA)	0	0	0	0	0	0	0	0	0
_:73(NA)	0	0	0	0	0	0	0	0	0
_:74(NA)	0	0	0	0	0	0	0	0	0
_:75(NA)	0	0	0	0	0	0	0	0	0
_:76(NA)	0	0	0	0	0	0	0	0	0
_:77(NA)	0	0	0	0	0	0	0	0	0
_:78(NA)	0	0	0	0	0	0	0	0	0
_:79(NA)	0	-0.01	0.01	0	0	0	0	0	0
_:80(NA)	0	0	0	0	0	0	0	0	0
_:81(NA)	0	0.01	-0.01	0	0	0	0	0	0
_:82(NA)	0	0	0	0	0	0	0	0	0
_:83(NA)	0	0	0	0	0	0	0	0	0
_:84(NA)	0	0	0	0	0	0	0	0	0
_:85(NA)	0	0	0	0	0	0	0	0	0
_:86(NA)	0	0.01	0	0	0	0	0	0	0
_:87(NA)	0	0	0	0	0	0	0	0	0
_:88(CL)	0	0	0	0	0	0	0	0	0
_:89(NA)	0	0	0	0	0	0	0	0	0
_:90(CL)	0	0	0.01	0	0	0	0	0	0
_:91(NA)	0	0.01	-0.01	0	0	0	0	0	0
_:92(CL)	0	0.01	0	0	0	0	0	0	0
_:93(NA)	0	0	0	0	0	0	0	0	0
_:94(CL)	0	0	0	0	0	0	0	0	0
_:95(NA)	0	0	0	0	0	0	0	0	0
_:96(CL)	0	0	0	0	0	0	0	0	0
_:97(NA)	0	0	0	0	0	0	0	0	0
_:98(CL)	0	0	0	0	0	0	0	0	0
_:99(NA)	0	0	0	0	0	0	0	0	0
_:100(CL)	0	0	0	0	0	0	0	0	0
_:101(NA)	0	0	0	0	0	0	0	0	0
_:102(CL)	0	0	0	0	0	0	0	0	0
_:103(NA)	0	0.01	-0.01	0	0	0	0	0	0
_:104(CL)	0	0	0	0	0	0	0	0	0
_:105(NA)	0	0	0	0	0	0	0	0	0
_:106(CL)	0	0	0	0	0	0	0	0	0
_:107(NA)	0	0	0	0	0	0	0	0	0
_:108(CL)	0	0	0	0	0	0	0	0	0
_:109(NA)	0	0.01	0	0	0	0	0	0	0
_:110(CL)	0	0	0	0	0	0	0	0	0
_:111(NA)	0	0	0	0	0	0	0	0	0
_:112(CL)	0	0	0	0	0	0	0	0	0
_:113(NA)	0	0	0	0	0	0	0	0	0
_:114(CL)	0	0	0	0	0	0	0	0	0
_:115(NA)	0	0	0	0	0	0	0	0	0
_:116(CL)	0	0	0	0	0	0	0	0	0
_:117(NA)	0	0	0.01	0	0	0	0	0	0
_:118(CL)	0	0	0	0	0	0	0	0	0
_:119(NA)	0	0	0	0	0	0	0	0	0
_:120(CL)	0	0	0	0	0	0	0	0	0
_:121(NA)	0	0	0	0	0	0	0	0	0
_:122(CL)	0	0	0	0	0	0	0	0	0
_:123(NA)	0	0.01	0	0	0	0	0	0	0
_:124(CL)	0	0	0	0	0	0	0	0	0
_:125(NA)	0	0	0	0	0	0	0	0	0
_:126(CL)	0	0	0	0	0	0	0	0	0
_:127(NA)	0	0	0	0	0	0	0	0	0
_:128(CL)	0	0.01	0	0	0	0	0	0	0
_:129(NA)	0	0.01	-0.01	0	0	0	0	0	0
_:130(CL)	0	0	0	0	0	0	0	0	0
_:131(NA)	0	0	0	0	0	0	0	0	0
_:132(CL)	0	0	0	0	0	0	0	0	0
_:133(NA)	0	0	0	0	0	0	0	0	0
_:134(CL)	0	0	0	0	0	0	0	0	0
_:135(NA)	0	0	0	0	0	0	0	0	0
_:136(CL)	0	0	0	0	0	0	0	0	0
_:137(NA)	0	0	0	0	0	0	0	0	0
_:138(CL)	0	0	0	0	0	0	0	0	0
_:139(NA)	0	0	0	0	0	0	0	0	0
_:140(CL)	0	0	0	0	0	0	0	0	0
_:141(NA)	0	0	0	0	0	0	0	0	0
_:142(CL)	0	0	0	0	0	0	0	0	0
_:143(NA)	0	0.01	-0.01	0	0	0	0	0	0
_:144(CL)	0.01	0	0	0	0	0	0	0	0
_:145(NA)	0	0	0	0	0	0	0	0	0
_:146(CL)	0	-0.01	0.01	0	0	0	0	0	0
_:147(NA)	0	0.01	0	0	0	0	0	0	0
_:148(CL)	0	0	0	0	0	0	0	0	0
_:149(NA)	0	0	0	0	0	0	0	0	0
_:150(CL)	0	0	0	0	0	0	0	0	0
_:151(CL)	0	0	0.01	0	0	0	0	0	0
_:152(CL)	0	0	0	0	0	0	0	0	0
_:153(CL)	0	0	0	0	0	0	0	0	0
_:154(CL)	0	0	0	0	0	0	0	0	0
_:155(CL)	0	0	0	0	0	0	0	0	0
_:156(CL)	0	0	0	0	0	0	0	0	0
_:157(CL)	0	0	0	0	0	0	0	0	0
_:158(CL)	0	0	0.01	0	0	0	0	0	0
_:159(CL)	0	0	0	0	0	0	0	0	0
_:160(CL)	0	0	0	0	0	0	0	0	0
_:161(CL)	0	0	0.01	0	0	0	0	0	0
_:162(CL)	0	-0.01	0.01	0	0	0	0	0	0
_:163(CL)	0	0	0	0	0	0	0	0	0
_:164(CL)	0	0	0	0	0	0	0	0	0
_:165(CL)	0	0	0	0	0	0	0	0	0
_:166(CL)	0	0	0	0	0	0	0	0	0
_:167(CL)	0	0	0	0	0	0	0	0	0
_:168(CL)	0	0	0	0	0	0	0	0	0
_:169(CL)	0	0	0	0	0	0	0	0	0
_:170(CL)	0	0	0	0	0	0	0	0	0
_:171(CL)	0	0	0	0	0	0	0	0	0
_:172(CL)	0	0	0	0	0	0	0	0	0
_:173(CL)	0	0	0	0	0	0	0	0	0
_:174(CL)	0	0	0	0	0	0	0	0	0
_:175(CL)	0	0	0	0	0	0	0	0	0
_:176(CL)	0	0	0	0	0	0	0	0	0
_:177(CL)	0	0	0	0	0	0	0	0	0
_:178(CL)	0	0	0	0	0	0	0	0	0
_:179(CL)	0	0	0	0	0	0	0	0	0
_:180(CL)	0	0	0	0	0	0	0	0	0
_:181(CL)	0	0	0	0	0	0	0	0	0
_:182(CL)	0	0	0	0	0	0	0	0	0
_:183(CL)	0	-0.02	0.03	0	0	0	0	0	0
_:184(CL)	0	0	0	0	0	0	0	0	0
_:185(CL)	0	0	0	0	0	0	0	0	0
_:186(CL)	0	0	0	0	0	0	0	0	0
_:187(CL)	0	0	0	0	0	0	0	0	0
_:188(CL)	0	0	0	0	0	0	0	0	0
_:189(CL)	0	0	0	0	0	0	0	0	0
_:190(CL)	0	-0.01	0.01	0	0	0	0	0	0
_:191(CL)	0	0	0	0	0	0	0	0	0
_:192(CL)	0	0	0	0	0	0	0	0	0
_:193(CL)	0	0	0	0	0	0	0	0	0
_:194(CL)	0	0	0	0	0	0	0	0	0
_:195(CL)	0	0	0	0	0	0	0	0	0
_:196(CL)	0	0	0	0	0	0	0	0	0
_:197(CL)	0	0	0.01	0	0	0	0	0	0
_:198(CL)	0	0	0	0	0	0	0	0	0
_:199(CL)	0	0	0	0	0	0	0	0	0
_:200(CL)	0	0	0	0	0	0	0	0	0
_:201(CL)	0	0	0	0	0	0	0	0	0
_:202(CL)	0	0	0	0	0	0	0	0	0
_:203(CL)	0	0	0	0	0	0	0	0	0
_:204(CL)	0	0	0	0	0	0	0	0	0
A:1(MET)	0	0	0	0	0	0	0	0	0
A:2(LEU)	0	0	0	0	0	0	0	0	0
A:3(SER)	0	0	0	0	0	0	0	0	0
A:4(ARG)	0	0.01	-0.01	0	0	0	0	0	0
A:5(ALA)	0	0	0	0	0	0	0	0	0
A:6(LEU)	0	0	0	0	0	0	0	0	0
A:7(LEU)	0	0	0	0	0	0	0	0	0
A:8(CYS)	0	0	0	0	0	0	0	0	0
A:9(LEU)	0	0	0	0	0	0	0	0	0
A:10(ALA)	0	0	0	0	0	0	0	0	0
A:11(LEU)	0	0	0	0	0	0	0	0	0
A:12(ALA)	0	0	0	0	0	0	0	0	0
A:13(TRP)	0	0	0	0	0	0	0	0	0
A:14(ALA)	0	0	0	0	0	0	0	0	0
A:15(ALA)	0	0	0	0	0	0	0	0	0
A:16(ARG)	0	0.01	-0.01	0	0	0	0	0	0
A:17(VAL)	0	0	0	0	0	0	0	0	0
A:18(GLY)	0	0	0	0	0	0	0	0	0
A:19(ALA)	0	0	0	0	0	0	0	0	0
A:20(ASP)	0	-0.01	0.01	0	0	0	0	0	0
A:21(ALA)	0	0	0	0	0	0	0	0	0
A:22(LEU)	0	0	0	0	0	0	0	0	0
A:23(GLU)	0	-0.01	0.01	0	0	0	0	0	0
A:24(GLU)	0	0	0	0	0	0	0	0	0
A:25(GLU)	0	0	0	0	0	0	0	0	0
A:26(ASP)	0	0	0	0	0	0	0	0	0
A:27(ASN)	0	0	0	0	0	0	0	0	0
A:28(VAL)	0	0	0	0	0	0	0	0	0
A:29(LEU)	0	0	0	0	0	0	0	0	0
A:30(VAL)	0	0	0	0	0	0	0	0	0
A:31(LEU)	0	0	0	0	0	0	0	0	0
A:32(LYS)	0	0.01	-0.01	0	0	0	0	0	0
A:33(LYS)	0	0.02	-0.02	0	0	0	0	0	0
A:34(SER)	0	0	0	0	0	0	0	0	0
A:35(ASN)	0	0	0	0	0	0	0	0	0
A:36(PHE)	0	0	0	0	0	0	0	0	0
A:37(GLU)	0	-0.02	0.02	0	0	0	0	0	0
A:38(GLU)	0	-0.01	0.01	0	0	0	0	0	0
A:39(ALA)	0	0	0	0	0	0	0	0	0
A:40(LEU)	0	0	0	0	0	0	0	0	0
A:41(ALA)	0	0	0	0	0	0	0	0	0
A:42(ALA)	0	0	0	0	0	0	0	0	0
A:43(HIS)	0	0	0	0	0	0	0	0	0
A:44(LYS)	0	0.01	0	0	0	0	0	0	0
A:45(TYR)	0	0	0	0	0	0	0	0	0
A:46(LEU)	0	0	0	0	0	0	0	0	0
A:47(LEU)	0	0	0	0	0	0	0	0	0
A:48(VAL)	0	0	0	0	0	0	0	0	0
A:49(GLH)	0	0	0	0	0	0	0	0	0
A:50(PHE)	0	0	0	0	0	0	0	0	0
A:51(TYR)	0	0	0	0	0	0	0	0	0
A:52(ALA)	0	0	0	0	0	0	0	0	0
A:53(PRO)	0	0	0	0	0	0	0	0	0
A:54(TRP)	0	0	0	0	0	0	0	0	0
A:55(CYS)	0	0	0	0	0	0	0	0	0
A:56(GLY)	0	0	0	0	0	0	0	0	0
A:57(HIE)	0	0	0	0	0	0	0	0	0
A:58(CYS)	0	0	0	0	0	0	0	0	0
A:59(LYS)	0	0	0	0	0	0	0	0	0
A:60(ALA)	0	0	0	0	0	0	0	0	0
A:61(LEU)	0	0	0	0	0	0	0	0	0
A:62(ALA)	0	0	0	0	0	0	0	0	0
A:63(PRO)	0	0	0	0	0	0	0	0	0
A:64(GLU)	0	0.01	-0.01	0	0	0	0	0	0
A:65(TYR)	0	0	0	0	0	0	0	0	0
A:66(ALA)	0	0	0	0	0	0	0	0	0
A:67(LYS)	0	-0.01	0.01	0	0	0	0	0	0
A:68(ALA)	0	0	0	0	0	0	0	0	0
A:69(ALA)	0	0	0	0	0	0	0	0	0
A:70(ALA)	0	0	0	0	0	0	0	0	0
A:71(LYS)	0	-0.01	0.01	0	0	0	0	0	0
A:72(LEU)	0	0	0	0	0	0	0	0	0
A:73(LYS)	0	0	0	0	0	0	0	0	0
A:74(ALA)	0	0	0	0	0	0	0	0	0
A:75(GLU)	0	0.01	-0.01	0	0	0	0	0	0
A:76(GLY)	0	0	0	0	0	0	0	0	0
A:77(SER)	0	0	0	0	0	0	0	0	0
A:78(GLU)	0	0	0	0	0	0	0	0	0
A:79(ILE)	0	0	0	0	0	0	0	0	0
A:80(ARG)	0	0	0	0	0	0	0	0	0
A:81(LEU)	0	0	0	0	0	0	0	0	0
A:82(ALA)	0	0	0	0	0	0	0	0	0
A:83(LYS)	0	0	0	0	0	0	0	0	0
A:84(VAL)	0	0	0	0	0	0	0	0	0
A:85(ASP)	0	-0.01	0.01	0	0	0	0	0	0
A:86(ALA)	0	0	0	0	0	0	0	0	0
A:87(THR)	0	0	0	0	0	0	0	0	0
A:88(GLU)	0	-0.01	0.01	0	0	0	0	0	0
A:89(GLU)	0	-0.01	0.01	0	0	0	0	0	0
A:90(SER)	0	0	0	0	0	0	0	0	0
A:91(ASP)	0	-0.02	0.02	0	0	0	0	0	0
A:92(LEU)	0	0	0	0	0	0	0	0	0
A:93(ALA)	0	0	0	0	0	0	0	0	0
A:94(GLN)	0	0	0	0	0	0	0	0	0
A:95(GLN)	0	0	0	0	0	0	0	0	0
A:96(TYR)	0	0	0	0	0	0	0	0	0
A:97(GLY)	0	0	0	0	0	0	0	0	0
A:98(VAL)	0	0	0	0	0	0	0	0	0
A:99(ARG)	0.01	0.03	-0.02	0	0	0	0	0	0
A:100(GLY)	0	0	0	0	0	0	0	0	0
A:101(TYR)	0	0	0	0	0	0	0	0	0
A:102(PRO)	0	0	0	0	0	0	0	0	0
A:103(THR)	0	0	0	0	0	0	0	0	0
A:104(ILE)	0	0	0	0	0	0	0	0	0
A:105(LYS)	0	0.02	-0.03	0	0	0	0	0	0
A:106(PHE)	0	0	0.01	0	0	0	0	0	0
A:107(PHE)	0	0	0	0	0	0	0	0	0
A:108(LYS)	0	-0.02	0.02	0	0	0	0	0	0
A:109(ASN)	0	0	0.01	0	0	0	0	0	0
A:110(GLY)	0	0	0	0	0	0	0	0	0
A:111(ASP)	0.01	-0.04	0.05	0	0	0	0	0	0
A:112(THR)	0	0	0	0	0	0	0	0	0
A:113(ALA)	0	-0.01	0.01	0	0	0	0	0	0
A:114(SER)	0.01	0.01	0	0	0	0	0	0	0
A:115(PRO)	-0.01	0	0	0	0	0	0	0	0
A:116(LYS)	0	0	0	0	-0.01	0	0	0	0
A:117(GLU)	0.03	0.01	0.02	0	-0.01	0	0	0	0
A:118(TYR)	0	0	0	0	0	0	0	0	0
A:119(THR)	0.01	-0.01	0.02	0	0	0	0	0	0
A:120(ALA)	0	0	0	0	0	0	0	0	0
A:121(GLY)	0	0	0	0	0	0	0	0	0
A:122(ARG)	0	-0.02	0.02	0	0	0	0	0	0
A:123(GLU)	0	0.01	-0.01	0	0	0	0	0	0
A:124(ALA)	0	0	0	0	0	0	0	0	0
A:125(ASP)	0	0.01	-0.01	0	0	0	0	0	0
A:126(ASP)	0	0.02	-0.02	0	0	0	0	0	0
A:127(ILE)	0	0	0	0	0	0	0	0	0
A:128(VAL)	0	0	0	0	0	0	0	0	0
A:129(ASN)	0	0	0	0	0	0	0	0	0
A:130(TRP)	0.01	0	0.01	0	0	0	0	0	0
A:131(LEU)	0	0	0	0	0	0	0	0	0
A:132(LYS)	0	-0.01	0.01	0	0	0	0	0	0
A:133(LYS)	0	-0.04	0.03	0	0	0	0	0	0
A:134(ARG)	0	-0.07	0.08	0	0	0	0	0	0
A:135(THR)	0	0	0	0	0	0	0	0	0
A:136(GLY)	0	0	0	0	0	0	0	0	0
A:137(PRO)	0	0	0	0	0	0	0	0	0
A:138(ALA)	0	0.01	0	0	0	0	0	0	0
A:139(ALA)	0	0	0	0	0	0	0	0	0
A:140(THR)	0	0	0	0	0	0	0	0	0
A:141(THR)	0	0	0	0	0	0	0	0	0
A:142(LEU)	0	0	0	0	0	0	0	0	0
A:143(SER)	0	0	0	0	0	0	0	0	0
A:144(ASP)	0	0.02	-0.01	0	0	0	0	0	0
A:145(THR)	0	0	0	0	0	0	0	0	0
A:146(ALA)	0	0	0	0	0	0	0	0	0
A:147(ALA)	0	0	0	0	0	0	0	0	0
A:148(ALA)	0	0	0	0	0	0	0	0	0
A:149(GLU)	0	0.02	-0.02	0	0	0	0	0	0
A:150(SER)	0	0	0	0	0	0	0	0	0
A:151(LEU)	0	0.01	-0.01	0	0	0	0	0	0
A:152(VAL)	0	0.01	0	0	0	0	0	0	0
A:153(ASP)	0.01	0.03	-0.03	0	0	0	0	0	0
A:154(SER)	0	0.01	-0.01	0	0	0	0	0	0
A:155(SER)	-0.02	-0.01	-0.01	0	0	0	0	0	0
A:156(GLU)	0.06	0.1	-0.03	0	-0.01	0	0	0	0
A:157(VAL)	0.01	0.01	0.03	0	-0.02	0	0	0	0
A:158(THR)	0.05	0.01	0.04	0	0	0	0	0	0
A:159(VAL)	0.03	0	0.03	0	0	0	0	0	0
A:160(ILE)	0.02	0	0.02	0	0	0	0	0	0
A:161(GLY)	0.01	0	0.01	0	0	0	0	0	0
A:162(PHE)	0.01	0	0.01	0	0	0	0	0	0
A:163(PHE)	0.01	0	0.01	0	0	0	0	0	0
A:164(LYS)	0	-0.01	0.01	0	0	0	0	0	0
A:165(ASP)	0	0.01	0	0	0	0	0	0	0
A:166(VAL)	0	0	0	0	0	0	0	0	0
A:167(GLU)	0	0	0	0	0	0	0	0	0
A:168(SER)	0	0	0	0	0	0	0	0	0
A:169(ASP)	0	0	0	0	0	0	0	0	0
A:170(SER)	0	0	0	0	0	0	0	0	0
A:171(ALA)	0	0	0	0	0	0	0	0	0
A:172(LYS)	0	0	0	0	0	0	0	0	0
A:173(GLN)	0	0	0.01	0	0	0	0	0	0
A:174(PHE)	0.04	0	0.04	0	0	0	0	0	0
A:175(LEU)	0.01	0	0.01	0	0	0	0	0	0
A:176(LEU)	-0.01	0	-0.01	0	0	0	0	0	0
A:177(ALA)	-0.01	0	-0.01	0	0	0	0	0	0
A:178(ALA)	0.01	0	0	0	0	0	0	0	0
A:179(GLU)	0.01	0	0.01	0	0	0	0	0	0
A:180(ALA)	-0.03	-0.01	-0.02	0	-0.01	0	0	0	0
A:181(ILE)	0	-0.02	0.06	0	-0.04	0	0	0	0
A:182(ASP)	0.03	0.03	0.01	0	-0.01	0	0	0	0
A:183(ASP)	0.21	0.28	0	0	-0.07	0	0	0	0
A:184(ILE)	0.05	0	0.08	0	-0.03	0	0	0	0
A:185(PRO)	0.03	0	0.03	0	0	0	0	0	0
A:186(PHE)	0.07	0	0.07	0	0	0	0	0	0
A:187(GLY)	0.02	0	0.02	0	0	0	0	0	0
A:188(ILE)	0	0	0	0	0	0	0	0	0
A:189(THR)	0	0	0	0	0	0	0	0	0
A:190(SER)	0	0	0	0	0	0	0	0	0
A:191(ASN)	0	0	0	0	0	0	0	0	0
A:192(SER)	0	0	0	0	0	0	0	0	0
A:193(GLY)	0	0	0	0	0	0	0	0	0
A:194(VAL)	0	0	0	0	0	0	0	0	0
A:195(PHE)	0	0	0	0	0	0	0	0	0
A:196(SER)	0	0	0	0	0	0	0	0	0
A:197(LYS)	0	-0.02	0.01	0	0	0	0	0	0
A:198(TYR)	0	0	0	0	0	0	0	0	0
A:199(GLN)	0	0	0	0	0	0	0	0	0
A:200(LEU)	0	0	0	0	0	0	0	0	0
A:201(ASP)	0	0.01	-0.01	0	0	0	0	0	0
A:202(LYS)	0	-0.01	0.01	0	0	0	0	0	0
A:203(ASP)	0	0.01	-0.01	0	0	0	0	0	0
A:204(GLY)	0	0	0	0	0	0	0	0	0
A:205(VAL)	-0.01	0	-0.01	0	0	0	0	0	0
A:206(VAL)	-0.02	0	-0.02	0	0	0	0	0	0
A:207(LEU)	0.02	-0.01	0.04	0	-0.01	0	0	0	0
A:208(PHE)	0.08	0.01	0.08	0	0	0	0	0	0
A:209(LYS)	-0.35	0.03	-0.35	0	-0.03	0	0	0	0
A:210(LYS)	0.01	-0.05	0.06	0	0	0	0	0	0
A:211(PHE)	0.16	0.02	0.2	0	-0.06	0	0	0	0
A:212(ASP)	0.41	-0.2	0.64	0	-0.04	0	0	0	0
A:213(GLU)	0.13	-0.01	0.15	0	-0.01	0	0	0	0
A:214(GLY)	-0.02	0.01	-0.02	0	0	0	0	0	0
A:215(ARG)	-0.04	-0.03	-0.01	0	0	0	0	0	0
A:216(ASN)	0.18	-0.01	0.2	0	-0.01	0	0	0	0
A:217(ASN)	0	0	0	0	0	0	0	0	0
A:218(PHE)	0.02	0	0.03	0	0	0	0	0	0
A:219(GLU)	0.05	0.03	0.02	0	0	0	0	0	0
A:220(GLY)	0.01	0	0.01	0	0	0	0	0	0
A:221(GLU)	0.01	0	0.01	0	0	0	0	0	0
A:222(ILE)	-0.01	0	-0.01	0	0	0	0	0	0
A:223(THR)	0.03	0	0.03	0	0	0	0	0	0
A:224(LYS)	0.04	0.03	0.02	0	0	0	0	0	0
A:225(GLU)	0.06	-0.04	0.11	0	-0.01	0	0	0	0
A:226(LYS)	0.03	0	0.04	0	-0.01	0	0	0	0
A:227(LEU)	0.11	0.01	0.12	0	-0.01	0	0	0	0
A:228(LEU)	0.19	0	0.22	0	-0.04	0	0	0	0
A:229(ASP)	0.4	-0.11	0.61	0	-0.09	0	0	0	0
A:230(PHE)	0.17	0	0.21	0	-0.05	0	0	0	0
A:231(ILE)	0.1	0.03	0.18	0	-0.11	0	0	0	0
A:232(LYS)	-0.66	0.18	1.1	0	-1.94	-0.01	0	0	0
A:233(HIS)	-2.82	-0.16	0.53	0	-2.01	0	-1.18	0	0
A:234(ASN)	-0.47	0	-0.12	0	-0.31	0	-0.03	0	0
A:235(GLN)	-1.65	-0.18	0.27	0	-1.36	-0.01	-0.37	0	0
A:236(LEU)	-2.59	0.05	0.72	0	-2.01	0	-1.35	0	0
A:237(PRO)	0.2	-0.49	1.6	0	-0.82	0	-0.09	0	0
A:238(LEU)	-3.38	-2.76	1.16	0	-0.9	-0.24	-0.65	0	0
A:239(VAL)	-0.72	-0.09	-0.27	0	-0.31	0	-0.06	0	0
A:240(ILE)	-2.05	0.16	-0.01	0	-1.25	0	-0.95	0	0
A:241(GLU)	0.22	-0.12	0.39	0	-0.04	0	0	0	0
A:242(PHE)	-0.03	0.01	-0.01	0	-0.03	0	0	0	0
A:243(THR)	0.12	0	0.13	0	-0.01	0	0	0	0
A:244(GLU)	0.04	-0.01	0.05	0	-0.01	0	0	0	0
A:245(GLN)	0	0.07	-0.05	0	-0.02	0	0	0	0
A:246(THR)	0.09	0.02	0.2	0	-0.12	0	0	0	0
A:247(ALA)	0.14	-0.06	0.25	0	-0.05	0	0	0	0
A:248(PRO)	-0.16	-0.19	0.16	0	-0.13	0	0	0	0
A:249(LYS)	-1.9	-1.95	1.96	0	-1.91	0	0	0	0
A:250(ILE)	-1.61	-0.11	0.19	0	-1.14	0	-0.55	0	0
A:251(PHE)	-0.06	-0.01	0.09	0	-0.15	0	0	0	0
A:252(GLY)	-0.72	0.06	0	0	-0.67	0	-0.11	0	0
A:253(GLY)	-1.44	0.06	-0.13	0	-0.95	0	-0.42	0	0
A:254(GLU)	0.13	-0.34	0.77	0	-0.27	0	-0.02	0	0
A:255(ILE)	-0.46	-0.07	0.35	0	-0.49	0	-0.25	0	0
A:256(LYS)	0	0.28	-0.24	0	-0.04	0	0	0	0
A:257(THR)	0.11	0.05	0.1	0	-0.04	0	0	0	0
A:258(HIE)	-0.13	0.02	-0.05	0	-0.1	0	0	0	0
A:259(ILE)	0.14	-0.02	0.2	0	-0.05	0	0	0	0
A:260(LEU)	0.03	0.04	0.01	0	-0.02	0	0	0	0
A:261(LEU)	0.05	-0.01	0.06	0	-0.01	0	0	0	0
A:262(PHE)	0.08	0	0.08	0	0	0	0	0	0
A:263(LEU)	0.05	0	0.05	0	0	0	0	0	0
A:264(PRO)	0.01	0	0.01	0	0	0	0	0	0
A:265(LYS)	0	0.05	-0.05	0	0	0	0	0	0
A:266(SER)	0	0	0	0	0	0	0	0	0
A:267(VAL)	0	0	0	0	0	0	0	0	0
A:268(SER)	0	0	0	0	0	0	0	0	0
A:269(ASP)	0	0	0.01	0	0	0	0	0	0
A:270(TYR)	0.04	-0.01	0.05	0	0	0	0	0	0
A:271(ASP)	0.03	-0.03	0.06	0	0	0	0	0	0
A:272(GLY)	0.01	0	0.01	0	0	0	0	0	0
A:273(LYS)	-0.01	0.01	-0.02	0	0	0	0	0	0
A:274(LEU)	0.08	0.01	0.08	0	-0.01	0	0	0	0
A:275(SER)	0.03	0.01	0.02	0	0	0	0	0	0
A:276(SER)	0.01	0.02	-0.01	0	0	0	0	0	0
A:277(PHE)	0.13	0.1	0.07	0	-0.04	0	0	0	0
A:278(LYS)	-0.06	0.17	-0.2	0	-0.03	0	0	0	0
A:279(ARG)	-0.02	-0.04	0.03	0	-0.01	0	0	0	0
A:280(ALA)	-0.08	0.03	-0.1	0	-0.01	0	0	0	0
A:281(ALA)	-0.06	0.15	-0.1	0	-0.1	0	0	0	0
A:282(GLU)	0.12	0.11	0.03	0	-0.03	0	0	0	0
A:283(GLY)	-0.04	-0.03	0.01	0	-0.01	0	0	0	0
A:284(PHE)	-0.04	-0.04	0.09	0	-0.1	0	0	0	0
A:285(LYS)	-1.72	-0.59	-0.28	0	-0.85	0	0	0	0
A:286(GLY)	-0.78	-0.38	0.31	0	-0.49	-0.02	-0.19	0	0
A:287(LYS)	-0.27	-0.3	0.11	0	-0.09	0	0	0	0
A:288(ILE)	-0.07	0.32	-0.03	0	-0.34	-0.01	0	0	0
A:289(LEU)	-5.64	-0.56	-0.83	0	-2.07	0	-2.18	0	0
A:290(PHE)	-2.31	-2.09	1.15	0	-0.79	-0.24	-0.35	0	0
A:291(ILE)	-0.3	0.1	0	0	-0.3	0	-0.1	0	0
A:292(PHE)	0.09	0	0.12	0	-0.03	0	0	0	0
A:293(ILE)	0.08	0	0.09	0	-0.01	0	0	0	0
A:294(ASP)	0.08	-0.04	0.11	0	0	0	0	0	0
A:295(SER)	0.03	0	0.03	0	0	0	0	0	0
A:296(ASP)	0	-0.02	0.02	0	0	0	0	0	0
A:297(HIE)	0.02	0	0.02	0	0	0	0	0	0
A:298(THR)	0	0	0	0	0	0	0	0	0
A:299(ASP)	0	-0.02	0.03	0	0	0	0	0	0
A:300(ASN)	0.02	0	0.03	0	0	0	0	0	0
A:301(GLN)	0.01	0	0	0	0	0	0	0	0
A:302(ARG)	0	0.05	-0.05	0	0	0	0	0	0
A:303(ILE)	0.01	0	0.01	0	0	0	0	0	0
A:304(LEU)	0.03	0	0.03	0	0	0	0	0	0
A:305(GLU)	0	-0.02	0.02	0	0	0	0	0	0
A:306(PHE)	0	0	0	0	0	0	0	0	0
A:307(PHE)	0.04	0	0.04	0	0	0	0	0	0
A:308(GLY)	0	0	0	0	0	0	0	0	0
A:309(LEU)	0	0	0	0	0	0	0	0	0
A:310(LYS)	0.01	0.01	0	0	0	0	0	0	0
A:311(LYS)	0	0.01	-0.01	0	0	0	0	0	0
A:312(GLU)	0	-0.01	0.01	0	0	0	0	0	0
A:313(GLU)	0	0	0	0	0	0	0	0	0
A:314(CYS)	0	0	0	0	0	0	0	0	0
A:315(PRO)	-0.02	0	-0.03	0	0	0	0	0	0
A:316(ALA)	0.03	-0.01	0.04	0	0	0	0	0	0
A:317(VAL)	-0.02	-0.01	-0.01	0	0	0	0	0	0
A:318(ARG)	0.01	-0.01	0.03	0	0	0	0	0	0
A:319(LEU)	-0.01	-0.02	0.01	0	-0.01	0	0	0	0
A:320(ILE)	0.07	0.02	0.06	0	-0.01	0	0	0	0
A:321(THR)	-0.02	0.01	-0.02	0	0	0	0	0	0
A:322(LEU)	0	-0.01	0.02	0	-0.01	0	0	0	0
A:323(GLU)	0.07	-0.07	0.15	0	0	0	0	0	0
A:324(GLU)	0.03	-0.05	0.07	0	0	0	0	0	0
A:325(GLU)	0	-0.02	0.03	0	0	0	0	0	0
A:326(MET)	-0.01	0	-0.01	0	0	0	0	0	0
A:327(THR)	0.03	0	0.04	0	0	0	0	0	0
A:328(LYS)	-0.02	0.01	-0.03	0	0	0	0	0	0
A:329(TYR)	0.04	0	0.04	0	0	0	0	0	0
A:330(LYS)	-0.01	-0.01	0.01	0	0	0	0	0	0
A:331(PRO)	0	-0.01	0.01	0	0	0	0	0	0
A:332(GLU)	0.01	0.02	-0.02	0	0	0	0	0	0
A:333(SER)	0	0	0	0	0	0	0	0	0
A:334(ASP)	0	0.01	-0.01	0	0	0	0	0	0
A:335(GLU)	0	0.03	-0.02	0	0	0	0	0	0
A:336(LEU)	0.01	0	0.01	0	0	0	0	0	0
A:337(THR)	0.03	0.01	0.02	0	0	0	0	0	0
A:338(ALA)	0.03	0.01	0.01	0	0	0	0	0	0
A:339(GLU)	0.02	0.05	-0.03	0	0	0	0	0	0
A:340(LYS)	-0.01	-0.03	0.02	0	0	0	0	0	0
A:341(ILE)	0.02	0.01	0.02	0	0	0	0	0	0
A:342(THR)	0.02	0.02	0	0	0	0	0	0	0
A:343(GLU)	0.01	0.05	-0.04	0	0	0	0	0	0
A:344(PHE)	0.01	-0.01	0.02	0	0	0	0	0	0
A:345(CYS)	0.02	0.01	0.02	0	0	0	0	0	0
A:346(HIS)	0.03	0.01	0.02	0	0	0	0	0	0
A:347(ARG)	-0.01	-0.06	0.05	0	0	0	0	0	0
A:348(PHE)	0.01	-0.02	0.03	0	0	0	0	0	0
A:349(LEU)	0.01	-0.02	0.03	0	0	0	0	0	0
A:350(GLU)	0	0.04	-0.04	0	0	0	0	0	0
A:351(GLY)	0	-0.01	0	0	0	0	0	0	0
A:352(LYS)	0	-0.03	0.03	0	0	0	0	0	0
A:353(ILE)	0.01	0	0.01	0	0	0	0	0	0
A:354(LYS)	0	0	0.01	0	0	0	0	0	0
A:355(PRO)	-0.01	0	-0.01	0	0	0	0	0	0
A:356(HIE)	0	0	0.01	0	0	0	0	0	0
A:357(LEU)	0	0	0	0	0	0	0	0	0
A:358(MET)	0	0	0	0	0	0	0	0	0
A:359(SER)	0	0	0	0	0	0	0	0	0
A:360(GLN)	0	0	0	0	0	0	0	0	0
A:361(GLU)	0	0	0	0	0	0	0	0	0
A:362(VAL)	0	0	0	0	0	0	0	0	0
A:363(PRO)	0	0	0	0	0	0	0	0	0
A:364(GLU)	0	0	0	0	0	0	0	0	0
A:365(ASP)	0	0	0	0	0	0	0	0	0
A:366(TRP)	0	0	0	0	0	0	0	0	0
A:367(ASP)	0	0	0	0	0	0	0	0	0
A:368(LYS)	0	0	0	0	0	0	0	0	0
A:369(GLN)	0	0	0	0	0	0	0	0	0
A:370(PRO)	0	0	0	0	0	0	0	0	0
A:371(VAL)	0	0	0	0	0	0	0	0	0
A:372(LYS)	0	0	0	0	0	0	0	0	0
A:373(VAL)	0	0	0	0	0	0	0	0	0
A:374(LEU)	0	0	0	0	0	0	0	0	0
A:375(VAL)	0	0	0	0	0	0	0	0	0
A:376(GLY)	0	0	0	0	0	0	0	0	0
A:377(ALA)	0	0	0	0	0	0	0	0	0
A:378(ASN)	0	0	0	0	0	0	0	0	0
A:379(PHE)	0	0	0	0	0	0	0	0	0
A:380(GLU)	0	0	0	0	0	0	0	0	0
A:381(GLU)	0	0	0	0	0	0	0	0	0
A:382(VAL)	0	0	0	0	0	0	0	0	0
A:383(ALA)	0	0	0	0	0	0	0	0	0
A:384(PHE)	0	0	0	0	0	0	0	0	0
A:385(ASP)	0	0	0	0	0	0	0	0	0
A:386(GLU)	0	0	0	0	0	0	0	0	0
A:387(LYS)	0	0	0	0	0	0	0	0	0
A:388(LYS)	0	0	0	0	0	0	0	0	0
A:389(ASN)	0	0	0	0	0	0	0	0	0
A:390(VAL)	0	0	0	0	0	0	0	0	0
A:391(PHE)	0	0	0	0	0	0	0	0	0
A:392(VAL)	0	0	0	0	0	0	0	0	0
A:393(GLH)	0	0	0	0	0	0	0	0	0
A:394(PHE)	0	0	0	0	0	0	0	0	0
A:395(TYR)	0	0	0	0	0	0	0	0	0
A:396(ALA)	0	0	0	0	0	0	0	0	0
A:397(PRO)	0	0	0	0	0	0	0	0	0
A:398(TRP)	0	0	0	0	0	0	0	0	0
A:399(CYS)	0	0	0	0	0	0	0	0	0
A:400(GLY)	0	0	0	0	0	0	0	0	0
A:401(HIS)	0	0	0	0	0	0	0	0	0
A:402(CYS)	0	0	0	0	0	0	0	0	0
A:403(LYS)	0	0.01	-0.01	0	0	0	0	0	0
A:404(GLN)	0	0	0	0	0	0	0	0	0
A:405(LEU)	0	0	0	0	0	0	0	0	0
A:406(ALA)	0	0	0	0	0	0	0	0	0
A:407(PRO)	0	0	0	0	0	0	0	0	0
A:408(ILE)	0	0	0	0	0	0	0	0	0
A:409(TRP)	0	0	0	0	0	0	0	0	0
A:410(ASP)	0	-0.01	0.01	0	0	0	0	0	0
A:411(LYS)	0	0.01	-0.01	0	0	0	0	0	0
A:412(LEU)	0	0	0	0	0	0	0	0	0
A:413(GLY)	0	0	0	0	0	0	0	0	0
A:414(GLU)	0	-0.01	0	0	0	0	0	0	0
A:415(THR)	0	0	0	0	0	0	0	0	0
A:416(TYR)	0	0	0	0	0	0	0	0	0
A:417(LYS)	0	0	0	0	0	0	0	0	0
A:418(ASP)	0	0	0	0	0	0	0	0	0
A:419(HIE)	0	0	0	0	0	0	0	0	0
A:420(GLU)	0	0	0	0	0	0	0	0	0
A:421(ASN)	0	0	0	0	0	0	0	0	0
A:422(ILE)	0	0	0	0	0	0	0	0	0
A:423(ILE)	0	0	0	0	0	0	0	0	0
A:424(ILE)	0	0	0	0	0	0	0	0	0
A:425(ALA)	0	0	0	0	0	0	0	0	0
A:426(LYS)	0	0.01	-0.01	0	0	0	0	0	0
A:427(MET)	0	0	0	0	0	0	0	0	0
A:428(ASP)	0	-0.01	0.01	0	0	0	0	0	0
A:429(SER)	0	0	0	0	0	0	0	0	0
A:430(THR)	0	0	0	0	0	0	0	0	0
A:431(ALA)	0	0	0	0	0	0	0	0	0
A:432(ASN)	0	0	0	0	0	0	0	0	0
A:433(GLU)	0	-0.01	0.02	0	0	0	0	0	0
A:434(VAL)	0	0	0	0	0	0	0	0	0
A:435(GLU)	0	-0.01	0.01	0	0	0	0	0	0
A:436(ALA)	0	0	0	0	0	0	0	0	0
A:437(VAL)	0	0	0	0	0	0	0	0	0
A:438(LYS)	0	0.02	-0.02	0	0	0	0	0	0
A:439(VAL)	0	0	0	0	0	0	0	0	0
A:440(HIE)	0	0	0	0	0	0	0	0	0
A:441(SER)	0	0	0	0	0	0	0	0	0
A:442(PHE)	0	0	0	0	0	0	0	0	0
A:443(PRO)	0	0	0	0	0	0	0	0	0
A:444(THR)	0	0	0	0	0	0	0	0	0
A:445(LEU)	0	0	0	0	0	0	0	0	0
A:446(LYS)	0	0.01	-0.01	0	0	0	0	0	0
A:447(PHE)	0	0	0	0	0	0	0	0	0
A:448(PHE)	0	0	0	0	0	0	0	0	0
A:449(PRO)	0	0	0	0	0	0	0	0	0
A:450(ALA)	0	0	0	0	0	0	0	0	0
A:451(SER)	0	0	0	0	0	0	0	0	0
A:452(ALA)	0	0	0	0	0	0	0	0	0
A:453(ASP)	0	0	0	0	0	0	0	0	0
A:454(ARG)	0	0	0	0	0	0	0	0	0
A:455(THR)	0	0	0	0	0	0	0	0	0
A:456(VAL)	0	0	0	0	0	0	0	0	0
A:457(ILE)	0	0	0	0	0	0	0	0	0
A:458(ASP)	0	-0.01	0.01	0	0	0	0	0	0
A:459(TYR)	0	0	0	0	0	0	0	0	0
A:460(ASN)	0	0	0	0	0	0	0	0	0
A:461(GLY)	0	0	0	0	0	0	0	0	0
A:462(GLU)	0	-0.01	0.01	0	0	0	0	0	0
A:463(ARG)	0	0.02	-0.02	0	0	0	0	0	0
A:464(THR)	0	0	0	0	0	0	0	0	0
A:465(LEU)	0	0	0	0	0	0	0	0	0
A:466(ASP)	0	0	0.01	0	0	0	0	0	0
A:467(GLY)	0	0	0	0	0	0	0	0	0
A:468(PHE)	0	0	0	0	0	0	0	0	0
A:469(LYS)	0	0	0	0	0	0	0	0	0
A:470(LYS)	0	0.01	-0.01	0	0	0	0	0	0
A:471(PHE)	0	0	0	0	0	0	0	0	0
A:472(LEU)	0	0	0	0	0	0	0	0	0
A:473(GLU)	0	0	0	0	0	0	0	0	0
A:474(SER)	0	0	0	0	0	0	0	0	0
A:475(GLY)	0	0	0	0	0	0	0	0	0
A:476(GLY)	0	0	0	0	0	0	0	0	0
A:477(GLN)	0	0	0	0	0	0	0	0	0
A:478(ASP)	0	-0.01	0.01	0	0	0	0	0	0
A:479(GLY)	0	0	0	0	0	0	0	0	0
A:480(ALA)	0	0	0	0	0	0	0	0	0
A:481(GLY)	0	0	0	0	0	0	0	0	0
A:482(ASP)	0	-0.01	0.01	0	0	0	0	0	0
A:483(ASP)	0	-0.01	0.01	0	0	0	0	0	0
A:484(GLU)	0	-0.01	0.01	0	0	0	0	0	0
A:485(ASP)	0	-0.01	0.01	0	0	0	0	0	0
A:486(LEU)	0	0	0	0	0	0	0	0	0
A:487(ASP)	0	-0.02	0.02	0	0	0	0	0	0
A:488(LEU)	0	0	0	0	0	0	0	0	0
A:489(GLU)	0	-0.03	0.03	0	0	0	0	0	0
A:490(GLU)	0	-0.04	0.04	0	0	0	0	0	0
A:491(ALA)	0	0	0	0	0	0	0	0	0
A:492(LEU)	0.01	0	0.01	0	0	0	0	0	0
A:493(GLU)	0.01	-0.04	0.05	0	0	0	0	0	0
A:494(PRO)	0	0	0	0	0	0	0	0	0
A:495(ASP)	0	-0.03	0.03	0	0	0	0	0	0
A:496(MET)	0	0	0	0	0	0	0	0	0
A:497(GLU)	0	-0.02	0.02	0	0	0	0	0	0
A:498(GLU)	0	-0.02	0.02	0	0	0	0	0	0
A:499(ASP)	0	-0.01	0.01	0	0	0	0	0	0
A:500(ASP)	0	-0.01	0.01	0	0	0	0	0	0
A:501(ASP)	0	-0.01	0.01	0	0	0	0	0	0
A:502(GLN)	0	0	0	0	0	0	0	0	0
A:503(LYS)	0	0.01	-0.01	0	0	0	0	0	0
A:504(ALA)	0	0	0	0	0	0	0	0	0
A:505(VAL)	0	0	0	0	0	0	0	0	0
A:506(LYS)	0	0.01	-0.01	0	0	0	0	0	0
A:507(ASP)	0	-0.01	0.01	0	0	0	0	0	0
A:508(GLU)	0	-0.01	0.01	0	0	0	0	0	0
A:509(LEU)	0	0	0.01	0	0	0	0	0	0

## Sheet: PITRM
Res	dGbind	Coulomb	Solvation	Covalent	vdW	H-bond	Lipo	Pi-Pi	Contact
_:0(*)	-14.23	-2.44	6.56	0	-12.91	-0.11	-6.36	0	0
_:1(NA)	0	0	0	0	0	0	0	0	0
_:2(NA)	0	0	0	0	0	0	0	0	0
_:3(NA)	0	0	0	0	0	0	0	0	0
_:4(NA)	0	0	0	0	0	0	0	0	0
_:5(NA)	0	0	0	0	0	0	0	0	0
_:6(NA)	0	0	0	0	0	0	0	0	0
_:7(NA)	0	0	0	0	0	0	0	0	0
_:8(NA)	0	0	0	0	0	0	0	0	0
_:9(NA)	0	0	0	0	0	0	0	0	0
_:10(NA)	0	0	0	0	0	0	0	0	0
_:11(NA)	0	0	0	0	0	0	0	0	0
_:12(NA)	0	0	0	0	0	0	0	0	0
_:13(NA)	0	0	0	0	0	0	0	0	0
_:14(NA)	0	0	0	0	0	0	0	0	0
_:15(NA)	0	0	0	0	0	0	0	0	0
_:16(NA)	0	0	0	0	0	0	0	0	0
_:17(NA)	0	0	0	0	0	0	0	0	0
_:18(NA)	0	0	0	0	0	0	0	0	0
_:19(NA)	0	0	0	0	0	0	0	0	0
_:20(NA)	0	0	0	0	0	0	0	0	0
_:21(NA)	0	0	0	0	0	0	0	0	0
_:22(NA)	0	0	0	0	0	0	0	0	0
_:23(NA)	0	0	0	0	0	0	0	0	0
_:24(NA)	0	0	0	0	0	0	0	0	0
_:25(NA)	0	0	0	0	0	0	0	0	0
_:26(NA)	0	0	0	0	0	0	0	0	0
_:27(NA)	0	0	0	0	0	0	0	0	0
_:28(NA)	0	0	0	0	0	0	0	0	0
_:29(NA)	0	0	0	0	0	0	0	0	0
_:30(NA)	0	0	0	0	0	0	0	0	0
_:31(NA)	0	0	0	0	0	0	0	0	0
_:32(NA)	0	0	0	0	0	0	0	0	0
_:33(NA)	0	0	0	0	0	0	0	0	0
_:34(NA)	0	0	0	0	0	0	0	0	0
_:35(NA)	0	0	0	0	0	0	0	0	0
_:36(NA)	0	0	0	0	0	0	0	0	0
_:37(NA)	0	0	0	0	0	0	0	0	0
_:38(NA)	0	0	0	0	0	0	0	0	0
_:39(NA)	0	0	0	0	0	0	0	0	0
_:40(NA)	0	0	0	0	0	0	0	0	0
_:41(NA)	0	0	0	0	0	0	0	0	0
_:42(NA)	0	0	0	0	0	0	0	0	0
_:43(NA)	0	0	0	0	0	0	0	0	0
_:44(NA)	0	0	0	0	0	0	0	0	0
_:45(NA)	0	0	0	0	0	0	0	0	0
_:46(NA)	0	0	0	0	0	0	0	0	0
_:47(NA)	0	0	0	0	0	0	0	0	0
_:48(NA)	0	0	0	0	0	0	0	0	0
_:49(NA)	0	0	0	0	0	0	0	0	0
_:50(NA)	0	0	0	0	0	0	0	0	0
_:51(NA)	0	0	0	0	0	0	0	0	0
_:52(NA)	0	0	0	0	0	0	0	0	0
_:53(NA)	0	0	0	0	0	0	0	0	0
_:54(NA)	0	0	0	0	0	0	0	0	0
_:55(NA)	0	0	0	0	0	0	0	0	0
_:56(NA)	0	0	0	0	0	0	0	0	0
_:57(NA)	0	0	0	0	0	0	0	0	0
_:58(NA)	0	0	0	0	0	0	0	0	0
_:59(NA)	0	0	0	0	0	0	0	0	0
_:60(NA)	0	0	0	0	0	0	0	0	0
_:61(NA)	0	0	0	0	0	0	0	0	0
_:62(NA)	0	0	0	0	0	0	0	0	0
_:63(NA)	0	0	0	0	0	0	0	0	0
_:64(NA)	0	0	0	0	0	0	0	0	0
_:65(NA)	0	0	0	0	0	0	0	0	0
_:66(NA)	0	0	0	0	0	0	0	0	0
_:67(NA)	0	0	0	0	0	0	0	0	0
_:68(NA)	0	0	0	0	0	0	0	0	0
_:69(NA)	0	0	0	0	0	0	0	0	0
_:70(NA)	0	0	0	0	0	0	0	0	0
_:71(NA)	0	0	0	0	0	0	0	0	0
_:72(NA)	0	0	0	0	0	0	0	0	0
_:73(NA)	0	0	0	0	0	0	0	0	0
_:74(NA)	0	0	0	0	0	0	0	0	0
_:75(NA)	0	0	0	0	0	0	0	0	0
_:76(NA)	0	0	0	0	0	0	0	0	0
_:77(NA)	0	0	0	0	0	0	0	0	0
_:78(NA)	0	0	0	0	0	0	0	0	0
_:79(NA)	0	0	0	0	0	0	0	0	0
_:80(NA)	0	0	0	0	0	0	0	0	0
_:81(NA)	0	0	0	0	0	0	0	0	0
_:82(NA)	0	0	0	0	0	0	0	0	0
_:83(NA)	0	0	0	0	0	0	0	0	0
_:84(NA)	0	0	0	0	0	0	0	0	0
_:85(NA)	0	0	0	0	0	0	0	0	0
_:86(NA)	0	0	0	0	0	0	0	0	0
_:87(NA)	0	0	0	0	0	0	0	0	0
_:88(NA)	0	0	0	0	0	0	0	0	0
_:89(NA)	0	0	0	0	0	0	0	0	0
_:90(NA)	0	0	0	0	0	0	0	0	0
_:91(NA)	0	0	0	0	0	0	0	0	0
_:92(NA)	0	0	0	0	0	0	0	0	0
_:93(NA)	0	0	0	0	0	0	0	0	0
_:94(NA)	0	0	0	0	0	0	0	0	0
_:95(NA)	0	0	0	0	0	0	0	0	0
_:96(NA)	0	0	0	0	0	0	0	0	0
_:97(NA)	0	0	0	0	0	0	0	0	0
_:98(NA)	0	0	0	0	0	0	0	0	0
_:99(NA)	0	0	0	0	0	0	0	0	0
_:100(NA)	0	0	0	0	0	0	0	0	0
_:101(NA)	0	0	0	0	0	0	0	0	0
_:102(NA)	0	0	0.01	0	0	0	0	0	0
_:103(NA)	0	0	0	0	0	0	0	0	0
_:104(NA)	0	0	0	0	0	0	0	0	0
_:105(NA)	0	0	0	0	0	0	0	0	0
_:106(NA)	0	0	0	0	0	0	0	0	0
_:107(NA)	0	0	0	0	0	0	0	0	0
_:108(NA)	0	0	0	0	0	0	0	0	0
_:109(NA)	0	0	0	0	0	0	0	0	0
_:110(CL)	0	0	0	0	0	0	0	0	0
_:111(NA)	0	0	0	0	0	0	0	0	0
_:112(CL)	0	0	0	0	0	0	0	0	0
_:113(CL)	0	0	0	0	0	0	0	0	0
_:114(CL)	0	0	0	0	0	0	0	0	0
_:115(CL)	0	0	0	0	0	0	0	0	0
_:116(CL)	0	0	0	0	0	0	0	0	0
_:117(CL)	0	0	0	0	0	0	0	0	0
_:118(CL)	0	0	0	0	0	0	0	0	0
_:119(CL)	0	0	0	0	0	0	0	0	0
_:120(CL)	0	0	0	0	0	0	0	0	0
_:121(CL)	0	0	0	0	0	0	0	0	0
_:122(CL)	0	0	0	0	0	0	0	0	0
_:123(CL)	0	0	0	0	0	0	0	0	0
_:124(CL)	0	0	0	0	0	0	0	0	0
_:125(CL)	0	0	0	0	0	0	0	0	0
_:126(CL)	0	0	0	0	0	0	0	0	0
_:127(CL)	0	0	0	0	0	0	0	0	0
_:128(CL)	0	0	0	0	0	0	0	0	0
_:129(CL)	0	0	0	0	0	0	0	0	0
_:130(CL)	0	0	0	0	0	0	0	0	0
_:131(CL)	0	0	0	0	0	0	0	0	0
_:132(CL)	0	0	0	0	0	0	0	0	0
_:133(CL)	0	0	0	0	0	0	0	0	0
_:134(CL)	0	0	0	0	0	0	0	0	0
_:135(CL)	0	0	0	0	0	0	0	0	0
_:136(CL)	0	0	0	0	0	0	0	0	0
_:137(CL)	0	0	0	0	0	0	0	0	0
_:138(CL)	0	0	0	0	0	0	0	0	0
_:139(CL)	0	0	0	0	0	0	0	0	0
_:140(CL)	0	0	0	0	0	0	0	0	0
_:141(CL)	0	0	0	0	0	0	0	0	0
_:142(CL)	0	0	0	0	0	0	0	0	0
_:143(CL)	0	0	0	0	0	0	0	0	0
_:144(CL)	0	0	0	0	0	0	0	0	0
_:145(CL)	0	0	0	0	0	0	0	0	0
_:146(CL)	0	0	0	0	0	0	0	0	0
_:147(CL)	0	0	0	0	0	0	0	0	0
_:148(CL)	0	0	0	0	0	0	0	0	0
_:149(CL)	0	0	0	0	0	0	0	0	0
_:150(CL)	0	0	0	0	0	0	0	0	0
_:151(CL)	0	0	0	0	0	0	0	0	0
_:152(CL)	0	0	0	0	0	0	0	0	0
_:153(CL)	0	0	0	0	0	0	0	0	0
_:154(CL)	0	0	0	0	0	0	0	0	0
_:155(CL)	0	0	0	0	0	0	0	0	0
_:156(CL)	0	0	0	0	0	0	0	0	0
_:157(CL)	0	0	0	0	0	0	0	0	0
_:158(CL)	0	0	0	0	0	0	0	0	0
_:159(CL)	0	0	0	0	0	0	0	0	0
_:160(CL)	0	0	0	0	0	0	0	0	0
_:161(CL)	0	0	0	0	0	0	0	0	0
_:162(CL)	0	0	0	0	0	0	0	0	0
_:163(CL)	0	0	0	0	0	0	0	0	0
_:164(CL)	0	0	0	0	0	0	0	0	0
_:165(CL)	0	0	0	0	0	0	0	0	0
_:166(CL)	0	0	0	0	0	0	0	0	0
_:167(CL)	0	0	0	0	0	0	0	0	0
_:168(CL)	0	0	0	0	0	0	0	0	0
_:169(CL)	0	0	0	0	0	0	0	0	0
_:170(CL)	0	0	0	0	0	0	0	0	0
_:171(CL)	0	0	0	0	0	0	0	0	0
_:172(CL)	0	0	0	0	0	0	0	0	0
_:173(CL)	0	0	0	0	0	0	0	0	0
_:174(CL)	0	0	0	0	0	0	0	0	0
_:175(CL)	0	0	0	0	0	0	0	0	0
_:176(CL)	0	0	0	0	0	0	0	0	0
_:177(CL)	0	0	0	0	0	0	0	0	0
_:178(CL)	0	0	0	0	0	0	0	0	0
_:179(CL)	0	0	0	0	0	0	0	0	0
_:180(CL)	0	0	0	0	0	0	0	0	0
_:181(CL)	0	0	0	0	0	0	0	0	0
_:182(CL)	0	0	0	0	0	0	0	0	0
_:183(CL)	0	0	0	0	0	0	0	0	0
_:184(CL)	0	0	0	0	0	0	0	0	0
_:185(CL)	0	0	0	0	0	0	0	0	0
_:186(CL)	0	0	0	0	0	0	0	0	0
_:187(CL)	0	0	0	0	0	0	0	0	0
_:188(CL)	0	0	0	0	0	0	0	0	0
_:189(CL)	0	0	0	0	0	0	0	0	0
_:190(CL)	0	0	0	0	0	0	0	0	0
_:191(CL)	0	0	0	0	0	0	0	0	0
_:192(CL)	0	0	0	0	0	0	0	0	0
_:193(CL)	0	0	0	0	0	0	0	0	0
_:194(CL)	0	0	0	0	0	0	0	0	0
_:195(CL)	0	0	0	0	0	0	0	0	0
_:196(CL)	0	0	0	0	0	0	0	0	0
_:197(CL)	0	0	0	0	0	0	0	0	0
_:198(CL)	0	0	0	0	0	0	0	0	0
_:199(CL)	0	0	0	0	0	0	0	0	0
_:200(CL)	0	0	0	0	0	0	0	0	0
_:201(CL)	0	0	0	0	0	0	0	0	0
_:202(CL)	0	0	0	0	0	0	0	0	0
_:203(CL)	0	0	0	0	0	0	0	0	0
_:204(CL)	0	0	0	0	0	0	0	0	0
_:205(CL)	0	0	0	0	0	0	0	0	0
_:206(CL)	0.04	0.05	-0.01	0	-0.01	0	0	0	0
_:207(CL)	0	0	0	0	0	0	0	0	0
_:208(CL)	0	0	0	0	0	0	0	0	0
_:209(CL)	0	0	0	0	0	0	0	0	0
_:210(CL)	0	0	0	0	0	0	0	0	0
_:211(CL)	0	0	0	0	0	0	0	0	0
_:212(CL)	0	0	0	0	0	0	0	0	0
_:213(CL)	0	0	0	0	0	0	0	0	0
_:214(CL)	0	0	0	0	0	0	0	0	0
_:215(CL)	0	0	0	0	0	0	0	0	0
_:216(CL)	0	0	0	0	0	0	0	0	0
_:217(CL)	0	0	0	0	0	0	0	0	0
_:218(CL)	0	0	0	0	0	0	0	0	0
A:1(MET)	0	-0.01	0.01	0	0	0	0	0	0
A:2(TRP)	0	0	0	0	0	0	0	0	0
A:3(ARG)	0	-0.01	0.01	0	0	0	0	0	0
A:4(PHE)	0	0	0	0	0	0	0	0	0
A:5(SER)	0	0	0	0	0	0	0	0	0
A:6(GLY)	0	0	0	0	0	0	0	0	0
A:7(ARG)	0	-0.01	0.01	0	0	0	0	0	0
A:8(ARG)	0	-0.01	0.01	0	0	0	0	0	0
A:9(GLY)	0	0	0	0	0	0	0	0	0
A:10(LEU)	0	0	0	0	0	0	0	0	0
A:11(CYS)	0	0	0	0	0	0	0	0	0
A:12(ALA)	0	0	0	0	0	0	0	0	0
A:13(VAL)	0	0	0	0	0	0	0	0	0
A:14(GLN)	0	0	0	0	0	0	0	0	0
A:15(ARG)	0	0	0	0	0	0	0	0	0
A:16(LEU)	0	0	0	0	0	0	0	0	0
A:17(SER)	0	0	0	0	0	0	0	0	0
A:18(CYS)	0	0	0	0	0	0	0	0	0
A:19(GLY)	0	0	0	0	0	0	0	0	0
A:20(ARG)	0	0	0	0	0	0	0	0	0
A:21(VAL)	0	0	0	0	0	0	0	0	0
A:22(HIE)	0	0	0	0	0	0	0	0	0
A:23(HIS)	0	0	0	0	0	0	0	0	0
A:24(ARG)	0	0	0	0	0	0	0	0	0
A:25(VAL)	0	0	0	0	0	0	0	0	0
A:26(TRP)	0	0	0	0	0	0	0	0	0
A:27(ARG)	0	0	0	0	0	0	0	0	0
A:28(GLU)	0	0	0	0	0	0	0	0	0
A:29(LYS)	0	0	0	0	0	0	0	0	0
A:30(SER)	0	0	0	0	0	0	0	0	0
A:31(ASP)	0	0	0	0	0	0	0	0	0
A:32(GLN)	0	0	0	0	0	0	0	0	0
A:33(ALA)	0	0	0	0	0	0	0	0	0
A:34(CYS)	0	0	0	0	0	0	0	0	0
A:35(GLU)	0	0	0	0	0	0	0	0	0
A:36(ARG)	0	-0.01	0	0	0	0	0	0	0
A:37(ALA)	0	0	0	0	0	0	0	0	0
A:38(LEU)	0	0	0	0	0	0	0	0	0
A:39(GLN)	0	0	0	0	0	0	0	0	0
A:40(TYR)	0	0	0	0	0	0	0	0	0
A:41(LYS)	0	0	0	0	0	0	0	0	0
A:42(VAL)	0	0	0	0	0	0	0	0	0
A:43(GLY)	0	0	0	0	0	0	0	0	0
A:44(GLU)	0	0	0	0	0	0	0	0	0
A:45(LYS)	0	0	0	0	0	0	0	0	0
A:46(ILE)	0	0	0	0	0	0	0	0	0
A:47(HIS)	0	0	0	0	0	0	0	0	0
A:48(GLY)	0	0	0	0	0	0	0	0	0
A:49(PHE)	0	0	0	0	0	0	0	0	0
A:50(THR)	0	0	0	0	0	0	0	0	0
A:51(VAL)	0	0	0	0	0	0	0	0	0
A:52(ASN)	0	0	0	0	0	0	0	0	0
A:53(GLN)	0	0	0	0	0	0	0	0	0
A:54(VAL)	0	0	0	0	0	0	0	0	0
A:55(THR)	0	0	0	0	0	0	0	0	0
A:56(PRO)	0	0	0	0	0	0	0	0	0
A:57(VAL)	0	0	0.01	0	0	0	0	0	0
A:58(PRO)	0	0	0	0	0	0	0	0	0
A:59(GLU)	0	-0.01	0.01	0	0	0	0	0	0
A:60(LEU)	0.01	0	0.01	0	0	0	0	0	0
A:61(PHE)	0	0	0.01	0	0	0	0	0	0
A:62(LEU)	0.01	0	0.01	0	0	0	0	0	0
A:63(THR)	0	0	0	0	0	0	0	0	0
A:64(ALA)	0	0	0	0	0	0	0	0	0
A:65(VAL)	0.01	0	0.01	0	0	0	0	0	0
A:66(LYS)	0	0	0	0	0	0	0	0	0
A:67(LEU)	0	0	0	0	0	0	0	0	0
A:68(SER)	0	0	0	0	0	0	0	0	0
A:69(HIE)	0	0	0	0	0	0	0	0	0
A:70(ASP)	0	0	0	0	0	0	0	0	0
A:71(ASN)	0	0	0	0	0	0	0	0	0
A:72(THR)	0	0	0	0	0	0	0	0	0
A:73(GLY)	0	0	0	0	0	0	0	0	0
A:74(ALA)	-0.01	0	-0.01	0	0	0	0	0	0
A:75(ARG)	0.01	0	0.01	0	0	0	0	0	0
A:76(TYR)	-0.02	0	-0.02	0	0	0	0	0	0
A:77(LEU)	0.02	0	0.02	0	0	0	0	0	0
A:78(HIE)	0.01	0	0.02	0	0	0	0	0	0
A:79(LEU)	0.03	0	0.03	0	0	0	0	0	0
A:80(ALA)	0.01	0	0.01	0	0	0	0	0	0
A:81(ARG)	0	0.01	-0.01	0	0	0	0	0	0
A:82(GLU)	0	0.01	0	0	0	0	0	0	0
A:83(ASP)	0.04	0.01	0.04	0	0	0	0	0	0
A:84(LYS)	0	-0.04	0.04	0	0	0	0	0	0
A:85(ASN)	0.01	0	0.03	0	-0.01	0	0	0	0
A:86(ASN)	0.01	0	0.02	0	0	0	0	0	0
A:87(LEU)	-0.01	0	0.01	0	-0.02	0	0	0	0
A:88(PHE)	0.05	0	0.06	0	-0.01	0	0	0	0
A:89(SER)	0.06	0	0.07	0	-0.01	0	0	0	0
A:90(VAL)	0.07	-0.01	0.08	0	0	0	0	0	0
A:91(GLN)	-0.12	0.03	-0.13	0	-0.01	0	0	0	0
A:92(PHE)	0.1	-0.01	0.11	0	0	0	0	0	0
A:93(ARG)	-0.05	0.01	-0.06	0	0	0	0	0	0
A:94(THR)	0.07	0	0.08	0	0	0	0	0	0
A:95(THR)	-0.01	0	-0.01	0	0	0	0	0	0
A:96(PRO)	0.02	0	0.02	0	0	0	0	0	0
A:97(MET)	0.01	0	0.01	0	0	0	0	0	0
A:98(ASP)	0.01	0.01	0	0	0	0	0	0	0
A:99(SER)	0.03	0.01	0.02	0	0	0	0	0	0
A:100(THR)	-0.01	0	-0.01	0	0	0	0	0	0
A:101(GLY)	0.02	-0.01	0.03	0	0	0	0	0	0
A:102(VAL)	0	0	0	0	0	0	0	0	0
A:103(PRO)	-0.01	0	0	0	0	0	0	0	0
A:104(HIS)	0.03	-0.01	0.06	0	-0.01	0	0	0	0
A:105(VAL)	0.02	0	0.03	0	0	0	0	0	0
A:106(LEU)	0.01	0	0.01	0	0	0	0	0	0
A:107(GLU)	0.14	-0.01	0.17	0	-0.02	0	0	0	0
A:108(HIP)	-0.06	0	-0.05	0	0	0	0	0	0
A:109(THR)	-0.01	0	-0.02	0	0	0	0	0	0
A:110(VAL)	-0.01	0	-0.01	0	0	0	0	0	0
A:111(LEU)	0.02	0	0.03	0	0	0	0	0	0
A:112(CYS)	0	0	0	0	0	0	0	0	0
A:113(GLY)	0	0	0	0	0	0	0	0	0
A:114(SER)	0	0	0	0	0	0	0	0	0
A:115(GLN)	0	0	0	0	0	0	0	0	0
A:116(LYS)	0	0	0	0	0	0	0	0	0
A:117(TYR)	0	0	0	0	0	0	0	0	0
A:118(PRO)	0	0	0	0	0	0	0	0	0
A:119(CYS)	0	0	0	0	0	0	0	0	0
A:120(ARG)	-0.01	-0.01	0.01	0	0	0	0	0	0
A:121(ASP)	0.01	0.01	-0.01	0	0	0	0	0	0
A:122(PRO)	0	0	0	0	0	0	0	0	0
A:123(PHE)	0.05	0	0.06	0	-0.01	0	0	0	0
A:124(PHE)	0.03	0	0.03	0	0	0	0	0	0
A:125(LYS)	0	-0.01	0.01	0	0	0	0	0	0
A:126(MET)	-0.01	0	-0.01	0	0	0	0	0	0
A:127(LEU)	0.01	0	0.02	0	-0.01	0	0	0	0
A:128(ASN)	0.01	0	0.01	0	0	0	0	0	0
A:129(ARG)	-0.01	-0.02	0.01	0	0	0	0	0	0
A:130(SER)	0.02	0	0.02	0	0	0	0	0	0
A:131(LEU)	-0.02	0.01	-0.02	0	-0.01	0	0	0	0
A:132(SER)	-0.11	-0.01	-0.07	0	-0.02	0	0	0	0
A:133(THR)	-0.4	-0.11	0.18	0	-0.36	0	-0.11	0	0
A:134(PHE)	-0.89	0	0.29	0	-0.59	0	-0.59	0	0
A:135(MET)	-0.04	0.02	-0.02	0	-0.04	0	0	0	0
A:136(ASN)	-0.22	-0.34	0.53	0	-0.35	-0.02	-0.04	0	0
A:137(ALA)	-0.06	0.01	0	0	-0.07	0	0	0	0
A:138(MET)	-1.05	-0.08	0.32	0	-0.76	0	-0.53	0	0
A:139(THR)	0.03	-0.01	0.16	0	-0.11	0	-0.01	0	0
A:140(ALA)	-0.4	-0.02	-0.11	0	-0.18	0	-0.1	0	0
A:141(SER)	0.09	0.04	0.14	0	-0.07	0	-0.01	0	0
A:142(ASP)	0.15	0	0.18	0	-0.02	0	0	0	0
A:143(TYR)	0.02	-0.1	0.39	0	-0.19	-0.01	-0.06	0	0
A:144(THR)	-0.02	0.01	-0.02	0	-0.01	0	0	0	0
A:145(ILE)	0.02	0.01	0.06	0	-0.05	0	0	0	0
A:146(TYR)	0	0	0.02	0	-0.01	0	0	0	0
A:147(PRO)	0.02	0.02	0.05	0	-0.05	0	0	0	0
A:148(PHE)	0	-0.01	0.02	0	-0.02	0	0	0	0
A:149(SER)	-0.01	0.01	0	0	-0.03	0	0	0	0
A:150(THR)	0.01	0	0.02	0	-0.01	0	0	0	0
A:151(GLN)	0.03	0	0.03	0	-0.01	0	0	0	0
A:152(ASN)	0.02	0	0.03	0	0	0	0	0	0
A:153(PRO)	0	0	0	0	0	0	0	0	0
A:154(LYS)	0	-0.02	0.01	0	0	0	0	0	0
A:155(ASP)	0.05	0.02	0.03	0	0	0	0	0	0
A:156(PHE)	0.04	0	0.04	0	0	0	0	0	0
A:157(GLN)	0.01	0	0.01	0	0	0	0	0	0
A:158(ASN)	-0.01	0	0	0	0	0	0	0	0
A:159(LEU)	0.01	0	0.02	0	0	0	0	0	0
A:160(LEU)	0.02	0	0.02	0	0	0	0	0	0
A:161(SER)	0	0	0	0	0	0	0	0	0
A:162(VAL)	-0.01	0	-0.01	0	0	0	0	0	0
A:163(TYR)	0.03	0.01	0.03	0	-0.01	0	0	0	0
A:164(LEU)	0.01	0	0.01	0	0	0	0	0	0
A:165(ASP)	0	0	0	0	0	0	0	0	0
A:166(ALA)	-0.01	0	-0.01	0	0	0	0	0	0
A:167(THR)	-0.01	0	-0.01	0	0	0	0	0	0
A:168(PHE)	0.01	0	0.01	0	0	0	0	0	0
A:169(PHE)	0	0	0	0	0	0	0	0	0
A:170(PRO)	0	0	0	0	0	0	0	0	0
A:171(CYS)	0	0	0	0	0	0	0	0	0
A:172(LEU)	0	0	0	0	0	0	0	0	0
A:173(ARG)	0	-0.01	0.01	0	0	0	0	0	0
A:174(GLU)	0	0	0	0	0	0	0	0	0
A:175(LEU)	0	0	0	0	0	0	0	0	0
A:176(ASP)	0	0.01	-0.01	0	0	0	0	0	0
A:177(PHE)	0	0	0	0	0	0	0	0	0
A:178(TRP)	0	0	0	0	0	0	0	0	0
A:179(GLN)	-0.01	0	0	0	0	0	0	0	0
A:180(GLU)	0.04	0.01	0.03	0	0	0	0	0	0
A:181(GLY)	0.01	0	0.01	0	0	0	0	0	0
A:182(TRP)	0	0	0	0	0	0	0	0	0
A:183(ARG)	0	-0.01	0.01	0	0	0	0	0	0
A:184(LEU)	0	0	0	0	0	0	0	0	0
A:185(GLU)	0	0	0	0	0	0	0	0	0
A:186(HIS)	0	0	0	0	0	0	0	0	0
A:187(GLU)	0	0	0	0	0	0	0	0	0
A:188(ASN)	0	0	0	0	0	0	0	0	0
A:189(PRO)	0	0	0	0	0	0	0	0	0
A:190(ARG)	0	-0.01	0.01	0	0	0	0	0	0
A:191(ASP)	0	0	0	0	0	0	0	0	0
A:192(PRO)	0	0	0	0	0	0	0	0	0
A:193(GLN)	0	0	0	0	0	0	0	0	0
A:194(THR)	0	0	0	0	0	0	0	0	0
A:195(PRO)	0	0	0	0	0	0	0	0	0
A:196(LEU)	0	0	0	0	0	0	0	0	0
A:197(ILE)	0	0	0	0	0	0	0	0	0
A:198(PHE)	0	0	0	0	0	0	0	0	0
A:199(LYS)	0	0	0	0	0	0	0	0	0
A:200(GLY)	0	0	0	0	0	0	0	0	0
A:201(VAL)	0	0	0	0	0	0	0	0	0
A:202(VAL)	0.03	0	0.03	0	0	0	0	0	0
A:203(PHE)	0.01	0	0.01	0	0	0	0	0	0
A:204(ASN)	-0.01	0	-0.01	0	0	0	0	0	0
A:205(GLU)	0.08	-0.01	0.1	0	-0.01	0	0	0	0
A:206(MET)	-0.06	-0.03	0.04	0	-0.05	0	-0.02	0	0
A:207(LYS)	0	0	0.01	0	0	0	0	0	0
A:208(GLY)	-0.02	0	-0.01	0	0	0	0	0	0
A:209(ALA)	-0.07	0	-0.02	0	-0.04	0	-0.01	0	0
A:210(PHE)	-0.06	-0.02	0.05	0	-0.06	0	-0.03	0	0
A:211(THR)	-0.01	0.01	-0.01	0	0	0	0	0	0
A:212(ASP)	0.1	-0.06	0.17	0	-0.01	0	0	0	0
A:213(ASN)	0.01	0	0.01	0	0	0	0	0	0
A:214(GLU)	0.05	-0.06	0.12	0	-0.02	0	0	0	0
A:215(ARG)	-0.21	0.14	-0.11	0	-0.18	0	-0.06	0	0
A:216(ILE)	0.02	0	0.03	0	-0.01	0	0	0	0
A:217(PHE)	0.01	0.01	0.01	0	-0.01	0	0	0	0
A:218(SER)	-0.06	0.01	0	0	-0.06	0	-0.02	0	0
A:219(GLN)	0.03	0.06	0.1	0	-0.1	0	-0.03	0	0
A:220(HIS)	0.01	0.01	0	0	-0.01	0	0	0	0
A:221(LEU)	-0.02	0.01	-0.02	0	0	0	0	0	0
A:222(GLN)	-0.03	-0.01	0.03	0	-0.04	0	0	0	0
A:223(ASN)	-0.01	0	-0.01	0	0	0	0	0	0
A:224(LYS)	-0.01	0	-0.01	0	0	0	0	0	0
A:225(LEU)	-0.01	0	-0.01	0	0	0	0	0	0
A:226(LEU)	0.02	0	0.02	0	0	0	0	0	0
A:227(PRO)	0	0	0	0	0	0	0	0	0
A:228(ASP)	0	0	0	0	0	0	0	0	0
A:229(HIE)	0.01	0	0.01	0	0	0	0	0	0
A:230(THR)	-0.01	0	-0.01	0	0	0	0	0	0
A:231(TYR)	0.07	0.01	0.07	0	-0.01	0	0	0	0
A:232(SER)	-0.01	0	-0.01	0	0	0	0	0	0
A:233(VAL)	0.01	0	0.01	0	0	0	0	0	0
A:234(VAL)	-0.1	-0.03	-0.03	0	-0.03	0	-0.01	0	0
A:235(SER)	-0.06	-0.02	0.02	0	-0.05	0	-0.01	0	0
A:236(GLY)	-0.08	-0.02	-0.02	0	-0.03	0	-0.01	0	0
A:237(GLY)	0.02	0	0.02	0	-0.01	0	0	0	0
A:238(ASP)	0.04	0.02	0.02	0	0	0	0	0	0
A:239(PRO)	0	0	0	0	0	0	0	0	0
A:240(LEU)	0	0	0	0	0	0	0	0	0
A:241(CYS)	-0.01	0	-0.01	0	0	0	0	0	0
A:242(ILE)	0.01	0	0.01	0	0	0	0	0	0
A:243(PRO)	0	0	0	0	0	0	0	0	0
A:244(GLU)	0	0	0	0	0	0	0	0	0
A:245(LEU)	0	0	0	0	0	0	0	0	0
A:246(THR)	0	0	0	0	0	0	0	0	0
A:247(TRP)	0	0	0	0	0	0	0	0	0
A:248(GLU)	0	0	0	0	0	0	0	0	0
A:249(GLN)	0	0	0	0	0	0	0	0	0
A:250(LEU)	0	0	0.01	0	0	0	0	0	0
A:251(LYS)	0	0	0	0	0	0	0	0	0
A:252(GLN)	0	0	0	0	0	0	0	0	0
A:253(PHE)	0.01	0	0.02	0	0	0	0	0	0
A:254(HIE)	0	0	0	0	0	0	0	0	0
A:255(ALA)	0	0	0	0	0	0	0	0	0
A:256(THR)	-0.01	0	0	0	0	0	0	0	0
A:257(HIS)	0	0	0	0	0	0	0	0	0
A:258(TYR)	0.03	0	0.04	0	0	0	0	0	0
A:259(HIE)	0.01	0	0.01	0	0	0	0	0	0
A:260(PRO)	0	0	0	0	0	0	0	0	0
A:261(SER)	0	0	0	0	0	0	0	0	0
A:262(ASN)	0	0	0	0	0	0	0	0	0
A:263(ALA)	-0.02	0	-0.03	0	0	0	0	0	0
A:264(ARG)	-0.04	0.01	-0.04	0	0	0	0	0	0
A:265(PHE)	0.02	0	0.02	0	0	0	0	0	0
A:266(PHE)	0.06	0	0.07	0	-0.01	0	0	0	0
A:267(THR)	0	0	0	0	0	0	0	0	0
A:268(TYR)	0.03	0	0.04	0	-0.01	0	0	0	0
A:269(GLY)	0	0	0.01	0	0	0	0	0	0
A:270(ASN)	0.01	0	0.01	0	0	0	0	0	0
A:271(PHE)	0.01	0	0.01	0	0	0	0	0	0
A:272(GLN)	0	0	0	0	0	0	0	0	0
A:273(LEU)	0.01	0	0.01	0	0	0	0	0	0
A:274(GLU)	0	0	0	0	0	0	0	0	0
A:275(GLY)	0	0	0	0	0	0	0	0	0
A:276(HIS)	0	0	0	0	0	0	0	0	0
A:277(LEU)	0	0	0	0	0	0	0	0	0
A:278(LYS)	0	0	0	0	0	0	0	0	0
A:279(GLN)	0	0	0	0	0	0	0	0	0
A:280(ILE)	0	0	0	0	0	0	0	0	0
A:281(HIE)	0	0	0	0	0	0	0	0	0
A:282(GLU)	0	0	0	0	0	0	0	0	0
A:283(GLU)	0	0	0	0	0	0	0	0	0
A:284(ALA)	0	0	0	0	0	0	0	0	0
A:285(LEU)	0	0	0	0	0	0	0	0	0
A:286(SER)	0	0	0	0	0	0	0	0	0
A:287(LYS)	0	0	0	0	0	0	0	0	0
A:288(PHE)	0	0	0	0	0	0	0	0	0
A:289(GLN)	0	0	0	0	0	0	0	0	0
A:290(ARG)	0	0	0	0	0	0	0	0	0
A:291(LEU)	0	0	0	0	0	0	0	0	0
A:292(GLU)	0	0	0	0	0	0	0	0	0
A:293(GLN)	0	0	0	0	0	0	0	0	0
A:294(SER)	0	0	0	0	0	0	0	0	0
A:295(THR)	0	0	0	0	0	0	0	0	0
A:296(ALA)	0	0	0	0	0	0	0	0	0
A:297(VAL)	0.01	0	0.01	0	0	0	0	0	0
A:298(PRO)	0	0	0	0	0	0	0	0	0
A:299(ALA)	0	0	0	0	0	0	0	0	0
A:300(GLN)	0	0	0	0	0	0	0	0	0
A:301(PRO)	0	0	0	0	0	0	0	0	0
A:302(HIS)	0	0	0	0	0	0	0	0	0
A:303(TRP)	0	0	0	0	0	0	0	0	0
A:304(ASP)	0	0	0	0	0	0	0	0	0
A:305(LYS)	0	0	0	0	0	0	0	0	0
A:306(PRO)	0	0	0	0	0	0	0	0	0
A:307(ARG)	0	0	0	0	0	0	0	0	0
A:308(GLU)	0	-0.01	0.01	0	0	0	0	0	0
A:309(PHE)	0	0	0	0	0	0	0	0	0
A:310(HIS)	0	0	0	0	0	0	0	0	0
A:311(ILE)	0	0	0	0	0	0	0	0	0
A:312(THR)	0	0	0	0	0	0	0	0	0
A:313(CYS)	0	0	0	0	0	0	0	0	0
A:314(GLY)	0	0	0	0	0	0	0	0	0
A:315(PRO)	0	0	0	0	0	0	0	0	0
A:316(ASP)	0	-0.02	0.02	0	0	0	0	0	0
A:317(SER)	0	0	0	0	0	0	0	0	0
A:318(LEU)	0	0	0	0	0	0	0	0	0
A:319(ALA)	0	0	0	0	0	0	0	0	0
A:320(THR)	0	0	0	0	0	0	0	0	0
A:321(GLU)	0	-0.02	0.02	0	0	0	0	0	0
A:322(THR)	0	0	0	0	0	0	0	0	0
A:323(ALA)	0	0	0	0	0	0	0	0	0
A:324(LYS)	0	0.01	-0.01	0	0	0	0	0	0
A:325(GLN)	0	0	0	0	0	0	0	0	0
A:326(THR)	0	0	0	0	0	0	0	0	0
A:327(THR)	-0.01	0	-0.01	0	0	0	0	0	0
A:328(VAL)	0	0	0	0	0	0	0	0	0
A:329(SER)	0.01	0	0	0	0	0	0	0	0
A:330(VAL)	0	0	0	0	0	0	0	0	0
A:331(SER)	-0.01	0	-0.01	0	0	0	0	0	0
A:332(PHE)	0.02	0	0.03	0	0	0	0	0	0
A:333(LEU)	-0.01	0	0	0	0	0	0	0	0
A:334(LEU)	0.01	0	0.01	0	0	0	0	0	0
A:335(PRO)	0.02	0.01	0.01	0	0	0	0	0	0
A:336(ASP)	-0.02	0.01	-0.03	0	0	0	0	0	0
A:337(ILE)	0.01	0	0.03	0	-0.02	0	0	0	0
A:338(THR)	0.01	0	0	0	0	0	0	0	0
A:339(ASP)	0.02	0.03	0	0	0	0	0	0	0
A:340(THR)	0.01	0.01	0.01	0	0	0	0	0	0
A:341(PHE)	0.02	0	0.02	0	0	0	0	0	0
A:342(GLU)	0.02	0.01	0.01	0	0	0	0	0	0
A:343(ALA)	0	-0.01	0.02	0	-0.01	0	0	0	0
A:344(PHE)	0.03	0	0.03	0	0	0	0	0	0
A:345(THR)	-0.01	-0.01	0	0	0	0	0	0	0
A:346(LEU)	-0.02	-0.01	0	0	0	0	0	0	0
A:347(SER)	-0.02	-0.04	0.03	0	-0.01	0	0	0	0
A:348(LEU)	0.02	-0.01	0.03	0	0	0	0	0	0
A:349(LEU)	0	-0.01	0.01	0	0	0	0	0	0
A:350(SER)	-0.03	0	-0.02	0	0	0	0	0	0
A:351(SER)	-0.01	0	0	0	0	0	0	0	0
A:352(LEU)	0	0	0	0	0	0	0	0	0
A:353(LEU)	-0.01	0	-0.01	0	0	0	0	0	0
A:354(ILE)	0	0	0.01	0	0	0	0	0	0
A:355(ALA)	0.01	0	0	0	0	0	0	0	0
A:356(GLY)	0.01	0	0	0	0	0	0	0	0
A:357(PRO)	0	0	0	0	0	0	0	0	0
A:358(ASN)	0	0	0	0	0	0	0	0	0
A:359(SER)	0	0	0	0	0	0	0	0	0
A:360(PRO)	0	0	0	0	0	0	0	0	0
A:361(PHE)	0	0	0	0	0	0	0	0	0
A:362(TYR)	0	0	0	0	0	0	0	0	0
A:363(LYS)	0	0.02	-0.02	0	0	0	0	0	0
A:364(ALA)	0	0	0	0	0	0	0	0	0
A:365(LEU)	0	0	0	0	0	0	0	0	0
A:366(ILE)	0	0	0	0	0	0	0	0	0
A:367(GLU)	0	-0.02	0.02	0	0	0	0	0	0
A:368(SER)	0	0	0	0	0	0	0	0	0
A:369(GLY)	0	0	0	0	0	0	0	0	0
A:370(LEU)	0	0	0	0	0	0	0	0	0
A:371(GLY)	0	0	0	0	0	0	0	0	0
A:372(THR)	0	0	0	0	0	0	0	0	0
A:373(ASP)	0.01	-0.04	0.06	0	0	0	0	0	0
A:374(PHE)	0	0	0	0	0	0	0	0	0
A:375(SER)	0	-0.01	0.01	0	0	0	0	0	0
A:376(PRO)	-0.02	0.01	-0.02	0	-0.01	0	0	0	0
A:377(ASP)	0.31	-0.13	0.51	0	-0.06	0	0	0	0
A:378(VAL)	0.01	-0.02	0.04	0	-0.01	0	0	0	0
A:379(GLY)	0.02	0	0.03	0	0	0	0	0	0
A:380(TYR)	-0.1	-0.17	0.25	0	-0.13	-0.01	-0.04	0	0
A:381(ASN)	-0.2	-0.07	-0.03	0	-0.09	0	-0.02	0	0
A:382(GLY)	-0.31	-0.12	0.05	0	-0.18	-0.02	-0.04	0	0
A:383(TYR)	-1.57	-0.15	0.41	0	-0.9	-0.01	-0.92	0	0
A:384(THR)	0.12	0	0.14	0	-0.02	0	0	0	0
A:385(ARG)	0	-0.02	0.03	0	-0.01	0	0	0	0
A:386(GLU)	0.03	0	0.03	0	0	0	0	0	0
A:387(ALA)	-0.03	-0.01	-0.01	0	-0.01	0	0	0	0
A:388(TYR)	0.13	0	0.16	0	-0.03	0	0	0	0
A:389(PHE)	0.02	0.01	0.02	0	0	0	0	0	0
A:390(SER)	0.02	0	0.02	0	0	0	0	0	0
A:391(VAL)	0.01	0	0.01	0	0	0	0	0	0
A:392(GLY)	0.01	0	0.01	0	0	0	0	0	0
A:393(LEU)	0	0	0	0	0	0	0	0	0
A:394(GLN)	0.01	0.01	0	0	0	0	0	0	0
A:395(GLY)	0	0	0	0	0	0	0	0	0
A:396(ILE)	0	0	0	0	0	0	0	0	0
A:397(ALA)	0	0	0	0	0	0	0	0	0
A:398(GLU)	0	-0.01	0.01	0	0	0	0	0	0
A:399(LYS)	0	0.01	-0.01	0	0	0	0	0	0
A:400(ASP)	0	-0.01	0.01	0	0	0	0	0	0
A:401(VAL)	0	0	0	0	0	0	0	0	0
A:402(LYS)	0	0.01	-0.01	0	0	0	0	0	0
A:403(THR)	0	0	0	0	0	0	0	0	0
A:404(VAL)	0	0	0	0	0	0	0	0	0
A:405(ARG)	0	0.01	-0.01	0	0	0	0	0	0
A:406(GLU)	0	-0.01	0.01	0	0	0	0	0	0
A:407(LEU)	0	0	0	0	0	0	0	0	0
A:408(VAL)	0	0	0	0	0	0	0	0	0
A:409(ASP)	0	-0.01	0.01	0	0	0	0	0	0
A:410(ARG)	0	0.01	-0.01	0	0	0	0	0	0
A:411(THR)	0	0	0	0	0	0	0	0	0
A:412(ILE)	0	0	0	0	0	0	0	0	0
A:413(GLU)	0	-0.01	0.01	0	0	0	0	0	0
A:414(GLU)	0	-0.01	0.01	0	0	0	0	0	0
A:415(VAL)	0	0	0	0	0	0	0	0	0
A:416(ILE)	0	0	0	0	0	0	0	0	0
A:417(GLU)	0	-0.01	0.01	0	0	0	0	0	0
A:418(LYS)	0	0.01	-0.01	0	0	0	0	0	0
A:419(GLY)	0	0	0	0	0	0	0	0	0
A:420(PHE)	0	0	0	0	0	0	0	0	0
A:421(GLU)	0	-0.01	0.01	0	0	0	0	0	0
A:422(ASP)	0	-0.01	0.01	0	0	0	0	0	0
A:423(ASP)	0	-0.01	0.01	0	0	0	0	0	0
A:424(ARG)	0	0.02	-0.02	0	0	0	0	0	0
A:425(ILE)	0	0	0.01	0	0	0	0	0	0
A:426(GLU)	0	-0.01	0.01	0	0	0	0	0	0
A:427(ALA)	0	0	0	0	0	0	0	0	0
A:428(LEU)	0.01	0	0.01	0	0	0	0	0	0
A:429(LEU)	0	0	0.01	0	0	0	0	0	0
A:430(HIS)	0	0	0	0	0	0	0	0	0
A:431(LYS)	0.01	0.05	-0.04	0	0	0	0	0	0
A:432(ILE)	0.02	-0.01	0.03	0	0	0	0	0	0
A:433(GLU)	0.01	-0.02	0.03	0	0	0	0	0	0
A:434(ILE)	0.01	0	0.01	0	0	0	0	0	0
A:435(GLN)	0.01	0	0.03	0	-0.02	0	0	0	0
A:436(THR)	-0.02	0	-0.01	0	-0.01	0	0	0	0
A:437(LYS)	-0.01	0.03	-0.04	0	0	0	0	0	0
A:438(HIE)	0.02	0.01	0.02	0	-0.01	0	0	0	0
A:439(GLN)	-0.02	0	-0.02	0	-0.01	0	0	0	0
A:440(SER)	0.05	0.04	0.05	0	-0.05	0	0	0	0
A:441(ALA)	-0.36	0.09	0.12	0	-0.43	0	-0.14	0	0
A:442(SER)	-0.9	-0.33	0.55	0	-0.77	0	-0.34	0	0
A:443(PHE)	0.01	-0.05	0.16	0	-0.1	0	0	0	0
A:444(GLY)	-0.01	-0.06	0.12	0	-0.06	0	0	0	0
A:445(LEU)	-2.29	-0.08	0.26	0	-1.41	0	-1.06	0	0
A:446(THR)	-1.14	-0.31	0.42	0	-0.82	-0.01	-0.42	0	0
A:447(LEU)	0.02	-0.02	0.11	0	-0.07	0	0	0	0
A:448(THR)	-0.26	0.06	-0.23	0	-0.09	0	0	0	0
A:449(SER)	-1.31	0.08	-0.01	0	-0.86	0	-0.52	0	0
A:450(TYR)	-0.68	0.09	0.07	0	-0.52	0	-0.31	0	0
A:451(ILE)	0.04	0.03	0.04	0	-0.04	0	0	0	0
A:452(ALA)	-0.17	0.03	-0.15	0	-0.05	0	0	0	0
A:453(SER)	-0.84	-0.32	-0.01	0	-0.29	-0.03	-0.19	0	0
A:454(CYS)	0.01	0	0.08	0	-0.06	0	0	0	0
A:455(TRP)	-0.02	0.01	-0.02	0	-0.01	0	0	0	0
A:456(ASN)	-0.11	0	-0.1	0	-0.01	0	0	0	0
A:457(HIP)	-0.22	-0.07	-0.08	0	-0.06	0	-0.01	0	0
A:458(ASP)	0.01	0.01	0	0	0	0	0	0	0
A:459(GLY)	-0.01	-0.01	0.01	0	0	0	0	0	0
A:460(ASP)	0.01	0.02	-0.01	0	0	0	0	0	0
A:461(PRO)	0.01	0	0.01	0	-0.01	0	0	0	0
A:462(VAL)	0.01	0	0.02	0	0	0	0	0	0
A:463(GLU)	0	0.01	-0.01	0	0	0	0	0	0
A:464(LEU)	0	-0.01	0.02	0	-0.01	0	0	0	0
A:465(LEU)	0.02	0	0.02	0	0	0	0	0	0
A:466(GLN)	0	0	0.01	0	0	0	0	0	0
A:467(ILE)	0.01	0	0.01	0	0	0	0	0	0
A:468(GLY)	0	0	0	0	0	0	0	0	0
A:469(SER)	0	0	0	0	0	0	0	0	0
A:470(GLN)	0	0	0	0	0	0	0	0	0
A:471(LEU)	0	0	0	0	0	0	0	0	0
A:472(THR)	0	0	0	0	0	0	0	0	0
A:473(ARG)	0	-0.01	0.01	0	0	0	0	0	0
A:474(PHE)	0	0	0	0	0	0	0	0	0
A:475(ARG)	0	0.01	-0.01	0	0	0	0	0	0
A:476(LYS)	0	0	0	0	0	0	0	0	0
A:477(CYS)	0	0	0	0	0	0	0	0	0
A:478(LEU)	0	0	0	0	0	0	0	0	0
A:479(LYS)	0	0	0	0	0	0	0	0	0
A:480(GLU)	0	0	0	0	0	0	0	0	0
A:481(ASN)	0	0	0	0	0	0	0	0	0
A:482(PRO)	0	0	0	0	0	0	0	0	0
A:483(LYS)	0	0	0	0	0	0	0	0	0
A:484(PHE)	0	0	0	0	0	0	0	0	0
A:485(LEU)	0	0	0	0	0	0	0	0	0
A:486(GLN)	0	0	0	0	0	0	0	0	0
A:487(GLU)	0	0	0	0	0	0	0	0	0
A:488(LYS)	0	0	0	0	0	0	0	0	0
A:489(VAL)	0	0	0	0	0	0	0	0	0
A:490(GLU)	0	0	0	0	0	0	0	0	0
A:491(GLN)	0	0	0	0	0	0	0	0	0
A:492(TYR)	0.01	0	0.01	0	0	0	0	0	0
A:493(PHE)	0.01	0	0.01	0	0	0	0	0	0
A:494(LYS)	0	0.01	0	0	0	0	0	0	0
A:495(ASN)	0	0	0	0	0	0	0	0	0
A:496(ASN)	0	0	0	0	0	0	0	0	0
A:497(GLN)	0	0	0	0	0	0	0	0	0
A:498(HIE)	0.01	0	0.01	0	0	0	0	0	0
A:499(LYS)	0	0.01	-0.01	0	0	0	0	0	0
A:500(LEU)	0.01	0	0.01	0	0	0	0	0	0
A:501(THR)	0	0	0	0	0	0	0	0	0
A:502(LEU)	0.01	0	0.01	0	0	0	0	0	0
A:503(SER)	0	0	0	0	0	0	0	0	0
A:504(MET)	0.01	0	0.01	0	0	0	0	0	0
A:505(LYS)	0	0.01	-0.01	0	0	0	0	0	0
A:506(PRO)	0	0	0	0	0	0	0	0	0
A:507(ASP)	0	-0.01	0.01	0	0	0	0	0	0
A:508(ASP)	0	-0.01	0.01	0	0	0	0	0	0
A:509(LYS)	0	0	0	0	0	0	0	0	0
A:510(TYR)	0.01	0	0	0	0	0	0	0	0
A:511(TYR)	0.01	0	0.01	0	0	0	0	0	0
A:512(GLU)	0	0	0	0	0	0	0	0	0
A:513(LYS)	0	0	-0.01	0	0	0	0	0	0
A:514(GLN)	0	0	0	0	0	0	0	0	0
A:515(THR)	0	0	0	0	0	0	0	0	0
A:516(GLN)	0	0	0	0	0	0	0	0	0
A:517(MET)	0	0	0	0	0	0	0	0	0
A:518(GLU)	0	0	0	0	0	0	0	0	0
A:519(THR)	0	0	0	0	0	0	0	0	0
A:520(GLU)	0	0	0	0	0	0	0	0	0
A:521(LYS)	0	-0.01	0.01	0	0	0	0	0	0
A:522(LEU)	0	0	0	0	0	0	0	0	0
A:523(GLU)	0	0	0	0	0	0	0	0	0
A:524(GLN)	0	0	0	0	0	0	0	0	0
A:525(LYS)	0	0	0	0	0	0	0	0	0
A:526(VAL)	0	0	0	0	0	0	0	0	0
A:527(ASN)	0	0	0	0	0	0	0	0	0
A:528(SER)	0	0	0	0	0	0	0	0	0
A:529(LEU)	0	0	0	0	0	0	0	0	0
A:530(SER)	0	0	0	0	0	0	0	0	0
A:531(PRO)	0	0	0	0	0	0	0	0	0
A:532(ALA)	0	0	0	0	0	0	0	0	0
A:533(ASP)	0	0	0	0	0	0	0	0	0
A:534(LYS)	0	0	0	0	0	0	0	0	0
A:535(GLN)	0	0	0	0	0	0	0	0	0
A:536(GLN)	0	0	0	0	0	0	0	0	0
A:537(ILE)	0	0	0	0	0	0	0	0	0
A:538(TYR)	0	0	0	0	0	0	0	0	0
A:539(GLU)	0	0	0	0	0	0	0	0	0
A:540(LYS)	0	0	0	0	0	0	0	0	0
A:541(GLY)	0	0	0	0	0	0	0	0	0
A:542(LEU)	0	0	0	0	0	0	0	0	0
A:543(GLU)	0	0	0	0	0	0	0	0	0
A:544(LEU)	0	0	0	0	0	0	0	0	0
A:545(GLN)	0	0	0	0	0	0	0	0	0
A:546(THR)	0	0	0	0	0	0	0	0	0
A:547(GLN)	0	0	0	0	0	0	0	0	0
A:548(GLN)	0	0	0	0	0	0	0	0	0
A:549(SER)	0	0	0	0	0	0	0	0	0
A:550(LYS)	0	-0.01	0.01	0	0	0	0	0	0
A:551(HIE)	0	0	0	0	0	0	0	0	0
A:552(GLN)	0	0	0	0	0	0	0	0	0
A:553(ASP)	0	0.01	-0.01	0	0	0	0	0	0
A:554(ALA)	0	0	0	0	0	0	0	0	0
A:555(SER)	0	0	0	0	0	0	0	0	0
A:556(CYS)	0	0	0	0	0	0	0	0	0
A:557(LEU)	0	0	0	0	0	0	0	0	0
A:558(PRO)	0	0	0	0	0	0	0	0	0
A:559(ALA)	0	0	0	0	0	0	0	0	0
A:560(LEU)	0	0	0.01	0	0	0	0	0	0
A:561(LYS)	0	-0.01	0.01	0	0	0	0	0	0
A:562(VAL)	0	0	0	0	0	0	0	0	0
A:563(SER)	0	0	0	0	0	0	0	0	0
A:564(ASP)	0	0.02	-0.02	0	0	0	0	0	0
A:565(ILE)	0	0	0.01	0	0	0	0	0	0
A:566(GLU)	0.01	0.02	-0.01	0	0	0	0	0	0
A:567(PRO)	0	0	0	0	0	0	0	0	0
A:568(SER)	0	0	0	0	0	0	0	0	0
A:569(MET)	0	0	0	0	0	0	0	0	0
A:570(PRO)	0	0	0	0	0	0	0	0	0
A:571(PHE)	0	0	0	0	0	0	0	0	0
A:572(THR)	0	0	0	0	0	0	0	0	0
A:573(LYS)	0	0	0	0	0	0	0	0	0
A:574(LEU)	0	0	0	0	0	0	0	0	0
A:575(ASP)	0	0	0	0	0	0	0	0	0
A:576(ILE)	0	0	0	0	0	0	0	0	0
A:577(GLY)	0	0	0	0	0	0	0	0	0
A:578(LEU)	0	0	0	0	0	0	0	0	0
A:579(ALA)	0	0	0	0	0	0	0	0	0
A:580(ALA)	0	0	0	0	0	0	0	0	0
A:581(GLY)	0	0	0	0	0	0	0	0	0
A:582(ASP)	0	0	0	0	0	0	0	0	0
A:583(ILE)	0	0	0	0	0	0	0	0	0
A:584(PRO)	0	0	0	0	0	0	0	0	0
A:585(VAL)	0	0	0	0	0	0	0	0	0
A:586(GLN)	0	0	0	0	0	0	0	0	0
A:587(TYR)	0	0	0	0	0	0	0	0	0
A:588(CYS)	0	0	0	0	0	0	0	0	0
A:589(PRO)	0	0	0	0	0	0	0	0	0
A:590(GLN)	0	0	0	0	0	0	0	0	0
A:591(PRO)	0	0	0	0	0	0	0	0	0
A:592(THR)	0	0	-0.01	0	0	0	0	0	0
A:593(ASN)	0.01	0.01	0	0	0	0	0	0	0
A:594(GLY)	0	0	0	0	0	0	0	0	0
A:595(MET)	0	0	0	0	0	0	0	0	0
A:596(VAL)	0	0	0	0	0	0	0	0	0
A:597(TYR)	0.03	0.01	0.02	0	0	0	0	0	0
A:598(PHE)	0	0	0.01	0	0	0	0	0	0
A:599(ARG)	-0.01	0.04	-0.05	0	0	0	0	0	0
A:600(ALA)	0	0	0.01	0	0	0	0	0	0
A:601(PHE)	0	0	0	0	0	0	0	0	0
A:602(SER)	0	0	0	0	0	0	0	0	0
A:603(SER)	0	0	0	0	0	0	0	0	0
A:604(LEU)	0	0	0	0	0	0	0	0	0
A:605(ASN)	0	0	0	0	0	0	0	0	0
A:606(THR)	0	0	0	0	0	0	0	0	0
A:607(LEU)	0	0	0	0	0	0	0	0	0
A:608(PRO)	0	0	0	0	0	0	0	0	0
A:609(GLU)	0	0	0	0	0	0	0	0	0
A:610(ASP)	0	-0.01	0.01	0	0	0	0	0	0
A:611(LEU)	0	0	0	0	0	0	0	0	0
A:612(ARG)	0	0.01	-0.01	0	0	0	0	0	0
A:613(PRO)	0	0	0	0	0	0	0	0	0
A:614(ILE)	0	0	0	0	0	0	0	0	0
A:615(VAL)	0	0	0	0	0	0	0	0	0
A:616(PRO)	0	0	0	0	0	0	0	0	0
A:617(LEU)	0	0	0	0	0	0	0	0	0
A:618(PHE)	0	0	0	0	0	0	0	0	0
A:619(CYS)	0	0	0	0	0	0	0	0	0
A:620(SER)	0	0	0	0	0	0	0	0	0
A:621(VAL)	0	0	0	0	0	0	0	0	0
A:622(LEU)	0	0	0	0	0	0	0	0	0
A:623(THR)	0	0	0	0	0	0	0	0	0
A:624(LYS)	0	0.03	-0.03	0	0	0	0	0	0
A:625(LEU)	0	0	0	0	0	0	0	0	0
A:626(GLY)	0	0	0	0	0	0	0	0	0
A:627(CYS)	0	0	0	0	0	0	0	0	0
A:628(GLY)	0	0	0	0	0	0	0	0	0
A:629(ILE)	0	0	0	0	0	0	0	0	0
A:630(LEU)	0	0	0	0	0	0	0	0	0
A:631(ASN)	0	0	0	0	0	0	0	0	0
A:632(TYR)	0	0	0	0	0	0	0	0	0
A:633(ARG)	0	0.02	-0.02	0	0	0	0	0	0
A:634(GLU)	0	-0.01	0.01	0	0	0	0	0	0
A:635(GLN)	0	0	0	0	0	0	0	0	0
A:636(ALA)	0	0	0	0	0	0	0	0	0
A:637(GLN)	0	0	0	0	0	0	0	0	0
A:638(GLN)	0	0	0	0	0	0	0	0	0
A:639(ILE)	0	0	0	0	0	0	0	0	0
A:640(GLU)	0.01	-0.04	0.05	0	0	0	0	0	0
A:641(LEU)	0	0	0	0	0	0	0	0	0
A:642(LYS)	0	0.02	-0.02	0	0	0	0	0	0
A:643(THR)	-0.01	0	0	0	0	0	0	0	0
A:644(GLY)	0	0	0.01	0	0	0	0	0	0
A:645(GLY)	0	0	0	0	0	0	0	0	0
A:646(MET)	0	0	0	0	0	0	0	0	0
A:647(SER)	0.01	0	0.01	0	0	0	0	0	0
A:648(VAL)	0	0	0	0	0	0	0	0	0
A:649(THR)	0.01	0	0.01	0	0	0	0	0	0
A:650(PRO)	0	0	0	0	0	0	0	0	0
A:651(HIE)	0.01	0	0	0	0	0	0	0	0
A:652(VAL)	0	0	0	0	0	0	0	0	0
A:653(LEU)	0	0	0	0	0	0	0	0	0
A:654(PRO)	0	0	0	0	0	0	0	0	0
A:655(ASP)	0	0.01	-0.01	0	0	0	0	0	0
A:656(ASP)	0	0.01	-0.01	0	0	0	0	0	0
A:657(SER)	0	0	0	0	0	0	0	0	0
A:658(GLN)	0	0	0	0	0	0	0	0	0
A:659(LEU)	0	0	0	0	0	0	0	0	0
A:660(ASP)	0	0	0	0	0	0	0	0	0
A:661(THR)	0	0	0	0	0	0	0	0	0
A:662(TYR)	0	0	0	0	0	0	0	0	0
A:663(GLU)	0.01	0	0.01	0	0	0	0	0	0
A:664(GLN)	0	0	0	0	0	0	0	0	0
A:665(GLY)	0	0	0	0	0	0	0	0	0
A:666(VAL)	0	0	-0.01	0	0	0	0	0	0
A:667(LEU)	0	0	0	0	0	0	0	0	0
A:668(PHE)	0	0	0	0	0	0	0	0	0
A:669(SER)	0	0	0	0	0	0	0	0	0
A:670(SER)	0	0	-0.01	0	0	0	0	0	0
A:671(LEU)	0.01	0	0.01	0	0	0	0	0	0
A:672(CYS)	0	0	0	0	0	0	0	0	0
A:673(LEU)	0	0	0	0	0	0	0	0	0
A:674(GLU)	0	-0.01	0.01	0	0	0	0	0	0
A:675(ARG)	0	0.02	-0.02	0	0	0	0	0	0
A:676(ASN)	0	0	0	0	0	0	0	0	0
A:677(LEU)	0	0	0	0	0	0	0	0	0
A:678(PRO)	0	0	0	0	0	0	0	0	0
A:679(ASP)	0	-0.01	0.01	0	0	0	0	0	0
A:680(MET)	0	0	0	0	0	0	0	0	0
A:681(MET)	0	0	0	0	0	0	0	0	0
A:682(HIE)	0	0	0	0	0	0	0	0	0
A:683(LEU)	0	0	0	0	0	0	0	0	0
A:684(TRP)	0	0	0	0	0	0	0	0	0
A:685(SER)	0	0	0	0	0	0	0	0	0
A:686(GLU)	0	-0.01	0.01	0	0	0	0	0	0
A:687(ILE)	0	0	0	0	0	0	0	0	0
A:688(PHE)	0	0	0	0	0	0	0	0	0
A:689(ASN)	0	0	0	0	0	0	0	0	0
A:690(ASN)	0	0	0	0	0	0	0	0	0
A:691(PRO)	0	0	0	0	0	0	0	0	0
A:692(CYS)	0	0	0	0	0	0	0	0	0
A:693(PHE)	0	0	0	0	0	0	0	0	0
A:694(GLU)	0	-0.01	0.01	0	0	0	0	0	0
A:695(GLU)	0	-0.01	0.01	0	0	0	0	0	0
A:696(GLU)	0	-0.01	0.01	0	0	0	0	0	0
A:697(GLU)	0	-0.01	0.01	0	0	0	0	0	0
A:698(HIE)	0	0	0	0	0	0	0	0	0
A:699(PHE)	0	0	0	0	0	0	0	0	0
A:700(LYS)	0	0.01	-0.01	0	0	0	0	0	0
A:701(VAL)	0	0	0	0	0	0	0	0	0
A:702(LEU)	0	0	0	0	0	0	0	0	0
A:703(VAL)	0	0	0	0	0	0	0	0	0
A:704(LYS)	0	0.02	-0.02	0	0	0	0	0	0
A:705(MET)	0	0	0	0	0	0	0	0	0
A:706(THR)	0	0	0	0	0	0	0	0	0
A:707(ALA)	0	0	0	0	0	0	0	0	0
A:708(GLN)	0	0.01	0	0	0	0	0	0	0
A:709(GLU)	0.02	-0.04	0.07	0	0	0	0	0	0
A:710(LEU)	0.01	0	0.01	0	0	0	0	0	0
A:711(SER)	0	0	-0.01	0	0	0	0	0	0
A:712(ASN)	0.01	0.01	0	0	0	0	0	0	0
A:713(GLY)	0.01	0	0.01	0	0	0	0	0	0
A:714(ILE)	-0.01	0	-0.01	0	0	0	0	0	0
A:715(SER)	-0.01	0.01	-0.01	0	0	0	0	0	0
A:716(ASP)	0.09	-0.03	0.14	0	-0.02	0	0	0	0
A:717(SER)	0	0	0.01	0	-0.01	0	0	0	0
A:718(GLY)	0	0	0	0	0	0	0	0	0
A:719(HIE)	0.04	0	0.05	0	-0.01	0	0	0	0
A:720(LEU)	0.01	0	0.01	0	-0.01	0	0	0	0
A:721(TYR)	0.01	0	0	0	0	0	0	0	0
A:722(ALA)	-0.01	0	-0.01	0	0	0	0	0	0
A:723(ALA)	0	0	0	0	0	0	0	0	0
A:724(LEU)	0	0	0	0	0	0	0	0	0
A:725(ARG)	0	0.01	-0.01	0	0	0	0	0	0
A:726(ALA)	0	0	0	0	0	0	0	0	0
A:727(SER)	0	0	0	0	0	0	0	0	0
A:728(LYS)	0	0.01	-0.01	0	0	0	0	0	0
A:729(THR)	0	0	0	0	0	0	0	0	0
A:730(LEU)	0	0	0	0	0	0	0	0	0
A:731(THR)	0	0	0	0	0	0	0	0	0
A:732(PRO)	0	0	0	0	0	0	0	0	0
A:733(SER)	0	0	0	0	0	0	0	0	0
A:734(GLY)	0	0	0	0	0	0	0	0	0
A:735(ASP)	0	-0.01	0.01	0	0	0	0	0	0
A:736(LEU)	0	0	0	0	0	0	0	0	0
A:737(GLN)	0	0	0	0	0	0	0	0	0
A:738(GLU)	0	-0.01	0.01	0	0	0	0	0	0
A:739(THR)	0	0	0	0	0	0	0	0	0
A:740(PHE)	0	0	0	0	0	0	0	0	0
A:741(SER)	0	0	0	0	0	0	0	0	0
A:742(GLY)	0	0	0	0	0	0	0	0	0
A:743(MET)	0	0	0	0	0	0	0	0	0
A:744(ASP)	0	-0.01	0.01	0	0	0	0	0	0
A:745(GLN)	0	0	0	0	0	0	0	0	0
A:746(VAL)	0	0	0	0	0	0	0	0	0
A:747(LYS)	0	0.01	-0.01	0	0	0	0	0	0
A:748(VAL)	0	0	0	0	0	0	0	0	0
A:749(MET)	0	0	0	0	0	0	0	0	0
A:750(LYS)	0	0.01	-0.01	0	0	0	0	0	0
A:751(ARG)	0	0.01	-0.01	0	0	0	0	0	0
A:752(ILE)	0	0	0	0	0	0	0	0	0
A:753(ALA)	0	0	0	0	0	0	0	0	0
A:754(GLU)	0	-0.01	0.01	0	0	0	0	0	0
A:755(MET)	0	0	0	0	0	0	0	0	0
A:756(THR)	0	0	0	0	0	0	0	0	0
A:757(ASP)	0	-0.01	0.01	0	0	0	0	0	0
A:758(ILE)	0	0	0	0	0	0	0	0	0
A:759(LYS)	0	0.01	-0.01	0	0	0	0	0	0
A:760(PRO)	0	0	0	0	0	0	0	0	0
A:761(ILE)	0	0	0	0	0	0	0	0	0
A:762(LEU)	0	0	0	0	0	0	0	0	0
A:763(ARG)	0	0.01	-0.01	0	0	0	0	0	0
A:764(LYS)	0	0.01	-0.01	0	0	0	0	0	0
A:765(LEU)	0	0	0	0	0	0	0	0	0
A:766(PRO)	0	0	0	0	0	0	0	0	0
A:767(ARG)	0	0.01	-0.01	0	0	0	0	0	0
A:768(ILE)	0	0	0	0	0	0	0	0	0
A:769(LYS)	0	0.01	-0.01	0	0	0	0	0	0
A:770(LYS)	0	0.01	-0.01	0	0	0	0	0	0
A:771(TYR)	0	0	0	0	0	0	0	0	0
A:772(LEU)	0	0	0	0	0	0	0	0	0
A:773(LEU)	0	0	0	0	0	0	0	0	0
A:774(ASN)	0	0	0	0	0	0	0	0	0
A:775(CYS)	0	0	0	0	0	0	0	0	0
A:776(ASP)	0	0	0	0	0	0	0	0	0
A:777(ASN)	0	0	0	0	0	0	0	0	0
A:778(MET)	0	0	0	0	0	0	0	0	0
A:779(ARG)	0	0	0	0	0	0	0	0	0
A:780(CYS)	0	0	0	0	0	0	0	0	0
A:781(SER)	0	0	0	0	0	0	0	0	0
A:782(VAL)	0	0	0	0	0	0	0	0	0
A:783(ASN)	0	0	0	0	0	0	0	0	0
A:784(ALA)	0	0	0	0	0	0	0	0	0
A:785(THR)	0	0	0	0	0	0	0	0	0
A:786(PRO)	0	0	0	0	0	0	0	0	0
A:787(GLN)	0	0	0	0	0	0	0	0	0
A:788(GLN)	0	0	0	0	0	0	0	0	0
A:789(MET)	0	0	0	0	0	0	0	0	0
A:790(PRO)	0	0	0	0	0	0	0	0	0
A:791(GLN)	0	0	0	0	0	0	0	0	0
A:792(ALA)	0	0	0	0	0	0	0	0	0
A:793(GLU)	0	0	0	0	0	0	0	0	0
A:794(LYS)	0	0	-0.01	0	0	0	0	0	0
A:795(GLU)	0	-0.01	0.01	0	0	0	0	0	0
A:796(VAL)	0	0	0	0	0	0	0	0	0
A:797(GLU)	0	0	0.01	0	0	0	0	0	0
A:798(ASN)	0	0	0	0	0	0	0	0	0
A:799(PHE)	0	0	0	0	0	0	0	0	0
A:800(LEU)	0	0	0	0	0	0	0	0	0
A:801(ARG)	0	0.01	-0.01	0	0	0	0	0	0
A:802(ASN)	0	0	0	0	0	0	0	0	0
A:803(VAL)	0	0	0	0	0	0	0	0	0
A:804(GLY)	0	0	0	0	0	0	0	0	0
A:805(ARG)	0	0	0	0	0	0	0	0	0
A:806(SER)	0	0	0	0	0	0	0	0	0
A:807(LYS)	0	0	-0.01	0	0	0	0	0	0
A:808(LYS)	0	0	0	0	0	0	0	0	0
A:809(GLU)	0	0	0	0	0	0	0	0	0
A:810(ARG)	0	0.01	-0.01	0	0	0	0	0	0
A:811(LYS)	0	0	0	0	0	0	0	0	0
A:812(PRO)	0	0	0	0	0	0	0	0	0
A:813(VAL)	0	0	0	0	0	0	0	0	0
A:814(ARG)	0	0	0	0	0	0	0	0	0
A:815(PRO)	0	0	0	0	0	0	0	0	0
A:816(HIS)	0	0	0	0	0	0	0	0	0
A:817(ILE)	0	0	0	0	0	0	0	0	0
A:818(VAL)	0	0	0	0	0	0	0	0	0
A:819(GLU)	0	0	0	0	0	0	0	0	0
A:820(LYS)	0	-0.01	0.01	0	0	0	0	0	0
A:821(PRO)	0	0	0	0	0	0	0	0	0
A:822(THR)	0	0	0	0	0	0	0	0	0
A:823(PRO)	0	0	0	0	0	0	0	0	0
A:824(SER)	0	0	0	0	0	0	0	0	0
A:825(GLY)	0	0	0	0	0	0	0	0	0
A:826(PRO)	0	0	0	0	0	0	0	0	0
A:827(SER)	0	0	0	0	0	0	0	0	0
A:828(GLY)	0	0	0	0	0	0	0	0	0
A:829(ALA)	0	0	0	0	0	0	0	0	0
A:830(ALA)	0	0	0	0	0	0	0	0	0
A:831(HIS)	0	0	0	0	0	0	0	0	0
A:832(VAL)	0	0	0	0	0	0	0	0	0
A:833(SER)	0	0	0	0	0	0	0	0	0
A:834(GLY)	0	0	0	0	0	0	0	0	0
A:835(SER)	0	0	0	0	0	0	0	0	0
A:836(GLN)	0	0	0	0	0	0	0	0	0
A:837(ILE)	0	0	0	0	0	0	0	0	0
A:838(VAL)	0	0	0	0	0	0	0	0	0
A:839(ARG)	0	-0.01	0.01	0	0	0	0	0	0
A:840(LYS)	0	0	0	0	0	0	0	0	0
A:841(LEU)	0	0	0	0	0	0	0	0	0
A:842(VAL)	0	0	0	0	0	0	0	0	0
A:843(THR)	0	0	0	0	0	0	0	0	0
A:844(ASP)	0	0	0	0	0	0	0	0	0
A:845(PRO)	0	0	0	0	0	0	0	0	0
A:846(THR)	0	0	0	0	0	0	0	0	0
A:847(PHE)	0	0	0	0	0	0	0	0	0
A:848(LYS)	0	0	0	0	0	0	0	0	0
A:849(PRO)	0	0	0	0	0	0	0	0	0
A:850(CYS)	0	0	0	0	0	0	0	0	0
A:851(GLN)	0	0	0	0	0	0	0	0	0
A:852(MET)	0	0	0	0	0	0	0	0	0
A:853(LYS)	0	0	0	0	0	0	0	0	0
A:854(THR)	0	0	0	0	0	0	0	0	0
A:855(HIE)	0	0	0	0	0	0	0	0	0
A:856(PHE)	0	0	0	0	0	0	0	0	0
A:857(VAL)	0	0	0	0	0	0	0	0	0
A:858(LEU)	0	0	0	0	0	0	0	0	0
A:859(PRO)	0	0	0	0	0	0	0	0	0
A:860(PHE)	0	0	0	0	0	0	0	0	0
A:861(PRO)	0	0	0	0	0	0	0	0	0
A:862(VAL)	0	0	0	0	0	0	0	0	0
A:863(ASN)	0	0	0	0	0	0	0	0	0
A:864(TYR)	0.03	0	0.03	0	0	0	0	0	0
A:865(ILE)	0.01	0	0.01	0	0	0	0	0	0
A:866(GLY)	0	0	0	0	0	0	0	0	0
A:867(GLU)	0	0.01	0	0	0	0	0	0	0
A:868(CYS)	0	0	0	0	0	0	0	0	0
A:869(VAL)	0	0	0	0	0	0	0	0	0
A:870(ARG)	0	-0.01	0.01	0	0	0	0	0	0
A:871(THR)	0	0	0	0	0	0	0	0	0
A:872(VAL)	0	0	0	0	0	0	0	0	0
A:873(PRO)	0	0	0	0	0	0	0	0	0
A:874(TYR)	0.01	0	0.01	0	0	0	0	0	0
A:875(ALA)	0	0	0	0	0	0	0	0	0
A:876(ASP)	0	0.02	-0.01	0	0	0	0	0	0
A:877(PRO)	0	0	0	0	0	0	0	0	0
A:878(ASP)	0	0.01	-0.01	0	0	0	0	0	0
A:879(HIS)	0.01	0.01	0	0	0	0	0	0	0
A:880(ALA)	0	0	0	0	0	0	0	0	0
A:881(SER)	0	0	0	0	0	0	0	0	0
A:882(LEU)	0	0	0	0	0	0	0	0	0
A:883(LYS)	-0.02	-0.07	0.05	0	-0.01	0	0	0	0
A:884(ILE)	0.01	0	0.01	0	0	0	0	0	0
A:885(LEU)	0	0	0	0	0	0	0	0	0
A:886(ALA)	0	0	0	0	0	0	0	0	0
A:887(ARG)	-0.02	-0.03	0.03	0	-0.01	0	0	0	0
A:888(LEU)	0	0	0	0	0	0	0	0	0
A:889(MET)	0	0	0	0	0	0	0	0	0
A:890(THR)	0	0	0.01	0	0	0	0	0	0
A:891(ALA)	0	0	0.01	0	0	0	0	0	0
A:892(LYS)	0	-0.02	0.02	0	0	0	0	0	0
A:893(PHE)	0	0	0	0	0	0	0	0	0
A:894(LEU)	0	0	0	0	0	0	0	0	0
A:895(HIS)	0.02	0	0.02	0	0	0	0	0	0
A:896(THR)	0	0	0	0	0	0	0	0	0
A:897(GLU)	0	0.01	-0.01	0	0	0	0	0	0
A:898(ILE)	0	0	0	0	0	0	0	0	0
A:899(ARG)	0	-0.03	0.03	0	0	0	0	0	0
A:900(GLU)	0	0.01	-0.01	0	0	0	0	0	0
A:901(LYS)	0	0	0	0	0	0	0	0	0
A:902(GLY)	0	0	0	0	0	0	0	0	0
A:903(GLY)	0	0	0	0	0	0	0	0	0
A:904(ALA)	-0.02	0.01	-0.03	0	0	0	0	0	0
A:905(TYR)	0.02	-0.06	0.17	0	-0.06	0	-0.03	0	0
A:906(GLY)	0.02	-0.01	0.03	0	-0.01	0	0	0	0
A:907(GLY)	0	0	0	0	0	0	0	0	0
A:908(GLY)	0	0	0.01	0	0	0	0	0	0
A:909(ALA)	-0.01	0	-0.01	0	0	0	0	0	0
A:910(LYS)	0.01	-0.04	0.06	0	-0.01	0	0	0	0
A:911(LEU)	0	0.01	0	0	0	0	0	0	0
A:912(THR)	0.01	0	0.02	0	0	0	0	0	0
A:913(HIE)	0.01	0	0	0	0	0	0	0	0
A:914(SER)	0	0	0	0	0	0	0	0	0
A:915(GLY)	0	0	0	0	0	0	0	0	0
A:916(ILE)	0	0	0	0	0	0	0	0	0
A:917(PHE)	0	0	0	0	0	0	0	0	0
A:918(THR)	0	0	0	0	0	0	0	0	0
A:919(LEU)	-0.01	0	0	0	0	0	0	0	0
A:920(TYR)	0.02	0	0.02	0	0	0	0	0	0
A:921(SER)	-0.01	0	0	0	0	0	0	0	0
A:922(TYR)	0.04	-0.01	0.08	0	-0.03	0	0	0	0
A:923(ARG)	-0.04	0.04	-0.06	0	-0.02	0	0	0	0
A:924(ASP)	0.02	0	0.02	0	0	0	0	0	0
A:925(PRO)	0	0	0	0	0	0	0	0	0
A:926(ASN)	0	0	0	0	0	0	0	0	0
A:927(SER)	0	0	0	0	0	0	0	0	0
A:928(ILE)	0	0	0	0	0	0	0	0	0
A:929(GLU)	0	0	0	0	0	0	0	0	0
A:930(THR)	0	0	0	0	0	0	0	0	0
A:931(LEU)	0	0	0	0	0	0	0	0	0
A:932(GLN)	0	0	0	0	0	0	0	0	0
A:933(SER)	0	0	0	0	0	0	0	0	0
A:934(PHE)	0	0	0	0	0	0	0	0	0
A:935(GLY)	0	0	0	0	0	0	0	0	0
A:936(LYS)	0	-0.01	0	0	0	0	0	0	0
A:937(ALA)	0	0	0	0	0	0	0	0	0
A:938(VAL)	0	0	0	0	0	0	0	0	0
A:939(ASP)	0	0.01	-0.01	0	0	0	0	0	0
A:940(TRP)	0	0	0	0	0	0	0	0	0
A:941(ALA)	0	0	0	0	0	0	0	0	0
A:942(LYS)	0	-0.01	0.01	0	0	0	0	0	0
A:943(SER)	0	0	0	0	0	0	0	0	0
A:944(GLY)	0	0	0	0	0	0	0	0	0
A:945(LYS)	0	-0.01	0.01	0	0	0	0	0	0
A:946(PHE)	0	0	0	0	0	0	0	0	0
A:947(THR)	0	0	0	0	0	0	0	0	0
A:948(GLN)	0	0	0	0	0	0	0	0	0
A:949(GLN)	0	0	0	0	0	0	0	0	0
A:950(ASP)	0	0.01	-0.01	0	0	0	0	0	0
A:951(ILE)	0	0	0	0	0	0	0	0	0
A:952(ASP)	0	0.02	-0.01	0	0	0	0	0	0
A:953(GLU)	0.01	0.02	-0.01	0	0	0	0	0	0
A:954(ALA)	0	0	0	0	0	0	0	0	0
A:955(LYS)	0	-0.01	0.02	0	0	0	0	0	0
A:956(LEU)	0	0	0	0	0	0	0	0	0
A:957(SER)	-0.01	0	0	0	-0.01	0	0	0	0
A:958(VAL)	0.02	0.01	0.03	0	-0.01	0	0	0	0
A:959(PHE)	0.01	0.02	0	0	-0.01	0	0	0	0
A:960(SER)	0.02	0.08	0.06	0	-0.1	0	-0.01	0	0
A:961(THR)	-0.34	-0.01	0.05	0	-0.26	0	-0.12	0	0
A:962(VAL)	-0.05	0.01	-0.02	0	-0.04	0	0	0	0
A:963(ASP)	-0.06	0.05	-0.08	0	-0.04	0	0	0	0
A:964(SER)	-0.93	-0.33	-0.14	0	-0.29	0	-0.18	0	0
A:965(PRO)	-0.78	-0.08	0.09	0	-0.46	0	-0.34	0	0
A:966(VAL)	-0.01	0.01	0.01	0	-0.03	0	0	0	0
A:967(ALA)	0.04	0.02	0.03	0	-0.01	0	0	0	0
A:968(PRO)	-0.01	0	-0.01	0	0	0	0	0	0
A:969(SER)	0.01	0	0	0	0	0	0	0	0
A:970(ASP)	0.04	-0.03	0.08	0	-0.01	0	0	0	0
A:971(LYS)	0.01	-0.03	0.05	0	0	0	0	0	0
A:972(GLY)	0	0	0.01	0	0	0	0	0	0
A:973(MET)	0	0	0.01	0	0	0	0	0	0
A:974(ASP)	0.04	0.04	0.01	0	-0.01	0	0	0	0
A:975(HIS)	0	0	0	0	0	0	0	0	0
A:976(PHE)	0	0	0	0	0	0	0	0	0
A:977(LEU)	0	0	0	0	0	0	0	0	0
A:978(TYR)	0.02	0	0.02	0	0	0	0	0	0
A:979(GLY)	0	0	0	0	0	0	0	0	0
A:980(LEU)	0	0	0	0	0	0	0	0	0
A:981(SER)	0.01	0	0	0	0	0	0	0	0
A:982(ASP)	0.01	0.02	-0.02	0	0	0	0	0	0
A:983(GLU)	0	0.01	-0.01	0	0	0	0	0	0
A:984(MET)	0	0	0	0	0	0	0	0	0
A:985(LYS)	0	-0.04	0.04	0	0	0	0	0	0
A:986(GLN)	0	0	0	0	0	0	0	0	0
A:987(ALA)	0	0	0	0	0	0	0	0	0
A:988(TYR)	0.01	-0.01	0.02	0	0	0	0	0	0
A:989(ARG)	0	-0.06	0.06	0	0	0	0	0	0
A:990(GLU)	0	0.02	-0.01	0	0	0	0	0	0
A:991(GLN)	0	0	0	0	0	0	0	0	0
A:992(LEU)	0	0	0.01	0	0	0	0	0	0
A:993(PHE)	0	0	0	0	0	0	0	0	0
A:994(ALA)	0	0	0	0	0	0	0	0	0
A:995(VAL)	0	0	0	0	0	0	0	0	0
A:996(ASN)	0	0	0	0	0	0	0	0	0
A:997(HIE)	0	0	0	0	0	0	0	0	0
A:998(ASP)	0	0.01	-0.01	0	0	0	0	0	0
A:999(LYS)	0	-0.01	0.01	0	0	0	0	0	0
A:1000(LEU)	0	0	0	0	0	0	0	0	0
A:1001(THR)	0	0	0	0	0	0	0	0	0
A:1002(SER)	0	0	0	0	0	0	0	0	0
A:1003(VAL)	0	0	0	0	0	0	0	0	0
A:1004(SER)	0	0	0	0	0	0	0	0	0
A:1005(HIE)	0	0	0	0	0	0	0	0	0
A:1006(LYS)	0	-0.01	0.01	0	0	0	0	0	0
A:1007(TYR)	0	0	0	0	0	0	0	0	0
A:1008(LEU)	0	0	0	0	0	0	0	0	0
A:1009(GLY)	0	0	0	0	0	0	0	0	0
A:1010(ILE)	0	0	0	0	0	0	0	0	0
A:1011(GLY)	0	0	0	0	0	0	0	0	0
A:1012(LYS)	0	-0.01	0	0	0	0	0	0	0
A:1013(SER)	0	0	0	0	0	0	0	0	0
A:1014(THR)	0	0	0	0	0	0	0	0	0
A:1015(HIP)	0	-0.01	0.01	0	0	0	0	0	0
A:1016(GLY)	0	0	0	0	0	0	0	0	0
A:1017(LEU)	0	0	0	0	0	0	0	0	0
A:1018(ALA)	0	0	0	0	0	0	0	0	0
A:1019(ILE)	0	0	0	0	0	0	0	0	0
A:1020(LEU)	0	0	0	0	0	0	0	0	0
A:1021(GLY)	0	0	0	0	0	0	0	0	0
A:1022(PRO)	0	0	0	0	0	0	0	0	0
A:1023(GLU)	0	0	0	0	0	0	0	0	0
A:1024(ASN)	0	0	0	0	0	0	0	0	0
A:1025(SER)	0	0	0	0	0	0	0	0	0
A:1026(LYS)	0	0	0	0	0	0	0	0	0
A:1027(ILE)	0	0	0	0	0	0	0	0	0
A:1028(ALA)	0	0	0	0	0	0	0	0	0
A:1029(LYS)	0	0	0	0	0	0	0	0	0
A:1030(ASP)	0	0	0	0	0	0	0	0	0
A:1031(PRO)	0	0	0	0	0	0	0	0	0
A:1032(SER)	0	0	0	0	0	0	0	0	0
A:1033(TRP)	0	0	0	0	0	0	0	0	0
A:1034(ILE)	0	0	0	0	0	0	0	0	0
A:1035(ILE)	0	0	0	0	0	0	0	0	0
A:1036(LYS)	0	0	0	0	0	0	0	0	0

## Sheet: 3LD6_Abiraterone
Res	dGbind	Coulomb	Solvation	Covalent	vdW	H-bond	Lipo	Pi-Pi	Contact
_:1(CL)	0	0	0	0	0	0	0	0	0
_:2(CL)	0	0	0	0	0	0	0	0	0
_:3(NA)	0	0	0	0	0	0	0	0	0
_:4(NA)	0	0	0	0	0	0	0	0	0
_:5(NA)	0	0	0	0	0	0	0	0	0
_:6(NA)	0	0	0	0	0	0	0	0	0
_:7(NA)	0	0	0	0	0	0	0	0	0
_:8(NA)	0	0	0	0	0	0	0	0	0
_:9(NA)	0	-0.01	0.01	0	0	0	0	0	0
_:10(NA)	0	0	0	0	0	0	0	0	0
_:11(NA)	0	0	0	0	0	0	0	0	0
_:12(NA)	0	0	0	0	0	0	0	0	0
_:13(NA)	0	0	0	0	0	0	0	0	0
_:14(NA)	0	0	0	0	0	0	0	0	0
_:15(NA)	0	0	0	0	0	0	0	0	0
_:16(NA)	0	0	0	0	0	0	0	0	0
_:17(NA)	0	0	0	0	0	0	0	0	0
_:18(NA)	0	0	0	0	0	0	0	0	0
_:19(NA)	0	0	0	0	0	0	0	0	0
_:20(NA)	0	0	0	0	0	0	0	0	0
_:21(NA)	0	0	0	0	0	0	0	0	0
_:22(NA)	0	0	0	0	0	0	0	0	0
_:23(NA)	0	0	0	0	0	0	0	0	0
_:24(NA)	0	0	0	0	0	0	0	0	0
_:25(NA)	0	0	0	0	0	0	0	0	0
_:26(NA)	0	0	0	0	0	0	0	0	0
_:27(NA)	0	0	0	0	0	0	0	0	0
_:28(NA)	0	0	0	0	0	0	0	0	0
_:29(NA)	0	0	0	0	0	0	0	0	0
_:30(NA)	0	0	0	0	0	0	0	0	0
_:31(NA)	0	0	0	0	0	0	0	0	0
_:32(NA)	-0.01	0	-0.01	0	0	0	0	0	0
_:33(NA)	0	0	0	0	0	0	0	0	0
_:34(NA)	0	0	0	0	0	0	0	0	0
_:35(NA)	0	0	0	0	0	0	0	0	0
_:36(NA)	0	0	0	0	0	0	0	0	0
_:37(CL)	0	0	0	0	0	0	0	0	0
_:38(NA)	0	0	0	0	0	0	0	0	0
_:39(CL)	0.01	0.01	0.01	0	0	0	0	0	0
_:40(CL)	0	0	0	0	0	0	0	0	0
_:41(CL)	0	0	0	0	0	0	0	0	0
_:42(CL)	0	0	0	0	0	0	0	0	0
_:43(CL)	0	0	0	0	0	0	0	0	0
_:44(CL)	0	0	0	0	0	0	0	0	0
_:45(CL)	0.01	0	0.01	0	0	0	0	0	0
_:46(CL)	0	0	0	0	0	0	0	0	0
_:47(CL)	0	0	0	0	0	0	0	0	0
_:48(CL)	0	0	0	0	0	0	0	0	0
_:49(CL)	0	0	0	0	0	0	0	0	0
_:50(CL)	0	0	0	0	0	0	0	0	0
_:51(CL)	0	0	0	0	0	0	0	0	0
_:52(CL)	0	0	0	0	0	0	0	0	0
_:53(CL)	0	0	0	0	0	0	0	0	0
_:54(CL)	0	0	0	0	0	0	0	0	0
_:55(CL)	0	0	0	0	0	0	0	0	0
_:56(CL)	0	0	0	0	0	0	0	0	0
_:57(CL)	0	0	0.01	0	0	0	0	0	0
_:58(CL)	0	0	0	0	0	0	0	0	0
_:59(CL)	0	0	0	0	0	0	0	0	0
_:60(CL)	0	0	0	0	0	0	0	0	0
_:61(CL)	0	0	0	0	0	0	0	0	0
_:62(CL)	0	0	0	0	0	0	0	0	0
_:63(CL)	0	0	0	0	0	0	0	0	0
_:64(CL)	0.01	0	0.02	0	0	0	0	0	0
_:65(CL)	0.03	-0.01	0.04	0	0	0	0	0	0
_:66(CL)	0	0	0	0	0	0	0	0	0
_:67(CL)	0	0	0	0	0	0	0	0	0
_:68(CL)	0	0	0.01	0	0	0	0	0	0
_:69(CL)	0	0	0	0	0	0	0	0	0
_:70(CL)	0	0	0	0	0	0	0	0	0
_:71(CL)	0	0	0	0	0	0	0	0	0
_:72(CL)	0	0	0	0	0	0	0	0	0
A:58(VAL)	0	0	0	0	0	0	0	0	0
A:59(LYS)	0	0	0	0	0	0	0	0	0
A:60(SER)	-0.02	0	-0.01	0	0	0	0	0	0
A:61(PRO)	0	0	0	0	0	0	0	0	0
A:62(PRO)	0.03	0	0.03	0	0	0	0	0	0
A:63(TYR)	-0.04	0	-0.04	0	0	0	0	0	0
A:64(ILE)	0.03	0	0.03	0	0	0	0	0	0
A:65(PHE)	0	0	0.01	0	0	0	0	0	0
A:66(SER)	0.02	0	0.02	0	0	0	0	0	0
A:67(PRO)	0	0	0	0	0	0	0	0	0
A:68(ILE)	0.02	0	0.02	0	0	0	0	0	0
A:69(PRO)	0.03	0	0.03	0	0	0	0	0	0
A:70(PHE)	0	0	0	0	0	0	0	0	0
A:71(LEU)	0.06	-0.01	0.07	0	-0.01	0	0	0	0
A:72(GLY)	-0.06	0	-0.05	0	0	0	0	0	0
A:73(HIE)	0.09	-0.02	0.12	0	-0.02	0	0	0	0
A:74(ALA)	0.01	-0.02	0.07	0	-0.03	0	0	0	0
A:75(ILE)	0.06	-0.01	0.08	0	-0.01	0	0	0	0
A:76(ALA)	-0.01	0.01	-0.01	0	-0.01	0	0	0	0
A:77(PHE)	-1.04	-0.08	0.33	0	-0.62	0	-0.61	-0.07	0
A:78(GLY)	0.01	0	0.03	0	-0.03	0	0	0	0
A:79(LYS)	-0.05	0.04	-0.08	0	-0.01	0	0	0	0
A:80(SER)	-0.09	0	-0.08	0	-0.01	0	0	0	0
A:81(PRO)	-0.08	0	0	0	-0.07	0	-0.01	0	0
A:82(ILE)	0.24	0.01	0.27	0	-0.03	0	0	0	0
A:83(GLU)	0.09	-0.02	0.11	0	0	0	0	0	0
A:84(PHE)	-0.08	-0.01	-0.06	0	-0.01	0	0	0	0
A:85(LEU)	0	-0.01	0.03	0	-0.03	0	0	0	0
A:86(GLU)	0.07	-0.02	0.09	0	0	0	0	0	0
A:87(ASN)	-0.02	0	-0.02	0	0	0	0	0	0
A:88(ALA)	-0.05	0	-0.05	0	0	0	0	0	0
A:89(TYR)	-0.01	0	-0.01	0	0	0	0	0	0
A:90(GLU)	0.01	-0.01	0.02	0	0	0	0	0	0
A:91(LYS)	-0.01	0.01	-0.02	0	0	0	0	0	0
A:92(TYR)	0	0	0	0	0	0	0	0	0
A:93(GLY)	0.02	0	0.02	0	0	0	0	0	0
A:94(PRO)	0.01	0	0.01	0	0	0	0	0	0
A:95(VAL)	-0.04	0	-0.04	0	0	0	0	0	0
A:96(PHE)	0.14	0	0.14	0	-0.01	0	0	0	0
A:97(SER)	-0.07	-0.01	-0.06	0	0	0	0	0	0
A:98(PHE)	0.13	0.03	0.22	0	-0.08	0	-0.04	0	0
A:99(THR)	-0.01	-0.01	0.01	0	-0.01	0	0	0	0
A:100(MET)	-0.57	-0.07	0.2	0	-0.4	0	-0.31	0	0
A:101(VAL)	0.03	0.01	0.09	0	-0.06	0	-0.01	0	0
A:102(GLY)	-0.02	0	-0.01	0	0	0	0	0	0
A:103(LYS)	-0.25	-0.1	-0.09	0	-0.05	0	0	0	0
A:104(THR)	0.01	0	0.02	0	-0.01	0	0	0	0
A:105(PHE)	-0.87	0.04	0.32	0	-0.52	0	-0.53	-0.18	0
A:106(THR)	0.05	0.01	0.06	0	-0.01	0	0	0	0
A:107(TYR)	0.49	-0.08	0.78	0	-0.16	-0.01	-0.03	0	0
A:108(LEU)	0.11	0	0.12	0	-0.01	0	0	0	0
A:109(LEU)	0.09	0	0.09	0	-0.01	0	0	0	0
A:110(GLY)	0.08	0	0.08	0	0	0	0	0	0
A:111(SER)	0.03	0	0.03	0	0	0	0	0	0
A:112(ASP)	0	-0.02	0.02	0	0	0	0	0	0
A:113(ALA)	-0.02	0	-0.01	0	0	0	0	0	0
A:114(ALA)	0.05	0	0.05	0	0	0	0	0	0
A:115(ALA)	0.04	0	0.04	0	0	0	0	0	0
A:116(LEU)	-0.02	0	-0.02	0	0	0	0	0	0
A:117(LEU)	0	0	0.01	0	-0.01	0	0	0	0
A:118(PHE)	0.18	0	0.18	0	-0.01	0	0	0	0
A:119(ASN)	0.01	0	0.02	0	0	0	0	0	0
A:120(SER)	0	-0.01	0	0	0	0	0	0	0
A:121(LYS)	0.04	0	0.04	0	0	0	0	0	0
A:122(ASN)	0.12	-0.01	0.14	0	0	0	0	0	0
A:123(GLU)	0.01	0	0.01	0	0	0	0	0	0
A:124(ASP)	-0.04	-0.01	-0.03	0	0	0	0	0	0
A:125(LEU)	-0.04	-0.01	-0.03	0	0	0	0	0	0
A:126(ASN)	0.23	-0.01	0.25	0	-0.01	0	0	0	0
A:127(ALA)	0.16	0	0.19	0	-0.03	0	0	0	0
A:128(GLU)	0.23	0.03	0.22	0	-0.02	0	0	0	0
A:129(ASP)	-0.01	0.04	-0.03	0	-0.02	0	0	0	0
A:130(VAL)	-0.19	0.01	-0.04	0	-0.16	0	0	0	0
A:131(TYR)	-2.76	-0.03	1.42	0	-2.03	0	-2.12	0	0
A:132(SER)	0.15	0.04	0.17	0	-0.05	0	0	0	0
A:133(ARG)	-0.28	-0.05	-0.15	0	-0.08	0	0	0	0
A:134(LEU)	-3.73	0	-0.23	0	-1.8	0	-1.69	0	0
A:135(THR)	-1.26	-0.95	0.33	0	-0.36	-0.07	-0.22	0	0
A:136(THR)	0.23	0.05	0.21	0	-0.03	0	0	0	0
A:137(PRO)	-0.16	-0.02	-0.11	0	-0.03	0	0	0	0
A:138(VAL)	-0.11	-0.07	0.03	0	-0.07	0	-0.01	0	0
A:139(PHE)	0.02	-0.06	0.23	0	-0.1	0	-0.04	0	0
A:140(GLY)	0.09	0.02	0.07	0	0	0	0	0	0
A:141(LYS)	0.02	-0.05	0.07	0	0	0	0	0	0
A:142(GLY)	-0.01	0	-0.01	0	0	0	0	0	0
A:143(VAL)	-0.03	-0.01	-0.01	0	0	0	0	0	0
A:144(ALA)	-0.07	-0.04	-0.03	0	-0.01	0	0	0	0
A:145(TYR)	0.14	-0.05	0.25	0	-0.06	0	-0.01	0	0
A:146(ASP)	0.02	0.06	-0.03	0	0	0	0	0	0
A:147(VAL)	0.03	0.01	0.02	0	0	0	0	0	0
A:148(PRO)	0.02	0.01	0.01	0	0	0	0	0	0
A:149(ASN)	0.08	0.02	0.07	0	0	0	0	0	0
A:150(PRO)	0	0	0	0	0	0	0	0	0
A:151(VAL)	-0.01	0	0	0	0	0	0	0	0
A:152(PHE)	0.2	0	0.23	0	-0.02	0	0	0	0
A:153(LEU)	0.04	0	0.03	0	0	0	0	0	0
A:154(GLU)	0	0.02	-0.02	0	0	0	0	0	0
A:155(GLN)	0.02	0.01	0.01	0	0	0	0	0	0
A:156(LYS)	-0.22	-0.06	-0.15	0	-0.01	0	0	0	0
A:157(LYS)	0.01	-0.02	0.03	0	0	0	0	0	0
A:158(MET)	-0.03	0	-0.02	0	0	0	0	0	0
A:159(LEU)	0.01	-0.01	0.03	0	0	0	0	0	0
A:160(LYS)	-0.01	0	-0.01	0	0	0	0	0	0
A:161(SER)	-0.01	0	0	0	0	0	0	0	0
A:162(GLY)	-0.03	-0.01	-0.02	0	0	0	0	0	0
A:163(LEU)	0.02	0	0.02	0	0	0	0	0	0
A:164(ASN)	0.03	0	0.03	0	0	0	0	0	0
A:165(ILE)	0.01	0	0	0	0	0	0	0	0
A:166(ALA)	0	0	0	0	0	0	0	0	0
A:167(HIP)	-0.01	-0.02	0.01	0	0	0	0	0	0
A:168(PHE)	0.03	0	0.03	0	0	0	0	0	0
A:169(LYS)	0	0	0.01	0	0	0	0	0	0
A:170(GLN)	0	0	0	0	0	0	0	0	0
A:171(HIE)	0.02	0	0.02	0	0	0	0	0	0
A:172(VAL)	0.01	0	0.01	0	0	0	0	0	0
A:173(SER)	0	0	0	0	0	0	0	0	0
A:174(ILE)	0	0	0	0	0	0	0	0	0
A:175(ILE)	0.01	0	0.01	0	0	0	0	0	0
A:176(GLU)	0.01	0	0.01	0	0	0	0	0	0
A:177(LYS)	0	-0.01	0.01	0	0	0	0	0	0
A:178(GLU)	0	0.01	-0.01	0	0	0	0	0	0
A:179(THR)	0	0	0	0	0	0	0	0	0
A:180(LYS)	0	0	0	0	0	0	0	0	0
A:181(GLU)	0	0.01	-0.01	0	0	0	0	0	0
A:182(TYR)	0	0	0	0	0	0	0	0	0
A:183(PHE)	0.01	0	0.01	0	0	0	0	0	0
A:184(GLU)	0	0	0	0	0	0	0	0	0
A:185(SER)	0	0	0	0	0	0	0	0	0
A:186(TRP)	0	0	0	0	0	0	0	0	0
A:187(GLY)	0	0	0	0	0	0	0	0	0
A:188(GLU)	0	0	0	0	0	0	0	0	0
A:189(SER)	0	0	0	0	0	0	0	0	0
A:190(GLY)	0	0	0	0	0	0	0	0	0
A:191(GLU)	0	-0.01	0.01	0	0	0	0	0	0
A:192(LYS)	0	0	0	0	0	0	0	0	0
A:193(ASN)	0.01	0	0.01	0	0	0	0	0	0
A:194(VAL)	0.01	0	0.01	0	0	0	0	0	0
A:195(PHE)	0.1	0	0.1	0	0	0	0	0	0
A:196(GLU)	0.03	-0.01	0.04	0	0	0	0	0	0
A:197(ALA)	0	0	0	0	0	0	0	0	0
A:198(LEU)	0.02	0	0.01	0	0	0	0	0	0
A:199(SER)	0.03	0.01	0.02	0	0	0	0	0	0
A:200(GLU)	0.02	0.01	0.01	0	0	0	0	0	0
A:201(LEU)	0	0	0	0	0	0	0	0	0
A:202(ILE)	0.03	0.01	0.02	0	0	0	0	0	0
A:203(ILE)	0.06	0	0.06	0	0	0	0	0	0
A:204(LEU)	0.01	0	0	0	0	0	0	0	0
A:205(THR)	-0.01	0	-0.01	0	0	0	0	0	0
A:206(ALA)	-0.01	0	-0.01	0	0	0	0	0	0
A:207(SER)	0	0	0	0	0	0	0	0	0
A:208(HIS)	0	0	-0.01	0	0	0	0	0	0
A:209(CYS)	-0.03	0	-0.02	0	0	0	0	0	0
A:210(LEU)	0.01	0	0.02	0	0	0	0	0	0
A:211(HIE)	0.02	-0.01	0.04	0	0	0	0	0	0
A:212(GLY)	0.01	0	0	0	0	0	0	0	0
A:213(LYS)	0	-0.01	0.01	0	0	0	0	0	0
A:214(GLU)	0	0.02	-0.02	0	0	0	0	0	0
A:215(ILE)	0	0	0	0	0	0	0	0	0
A:216(ARG)	-0.01	-0.03	0.02	0	0	0	0	0	0
A:217(SER)	0	0	0	0	0	0	0	0	0
A:218(GLN)	0	0	0	0	0	0	0	0	0
A:219(LEU)	0.01	0	0.01	0	0	0	0	0	0
A:220(ASN)	0	0	0	0	0	0	0	0	0
A:221(GLU)	0	0.01	-0.01	0	0	0	0	0	0
A:222(LYS)	0	-0.02	0.02	0	0	0	0	0	0
A:223(VAL)	0.01	0	0.01	0	0	0	0	0	0
A:224(ALA)	0.01	0	0	0	0	0	0	0	0
A:225(GLN)	0	0	0	0	0	0	0	0	0
A:226(LEU)	0.01	0	0.01	0	0	0	0	0	0
A:227(TYR)	0.09	0.01	0.08	0	0	0	0	0	0
A:228(ALA)	0.01	0	0.01	0	0	0	0	0	0
A:229(ASP)	-0.01	0.03	-0.04	0	0	0	0	0	0
A:230(LEU)	0	0	0.01	0	-0.01	0	0	0	0
A:231(ASP)	0.23	0.02	0.23	0	-0.02	0	0	0	0
A:232(GLY)	0	0	0.01	0	-0.01	0	0	0	0
A:233(GLY)	-0.06	0	-0.05	0	-0.01	0	0	0	0
A:234(PHE)	-1.47	-0.02	0.09	0	-0.74	0	-0.8	0	0
A:235(SER)	0.16	-0.01	0.3	0	-0.12	0	0	0	0
A:236(HIS)	-1.57	-0.27	1.18	0	-1.46	0	-0.82	-0.2	0
A:237(ALA)	0.14	-0.01	0.2	0	-0.05	0	0	0	0
A:238(ALA)	-0.22	0.01	-0.2	0	-0.04	0	0	0	0
A:239(TRP)	-3.44	0.06	0.45	0	-1.59	0	-2.01	-0.35	0
A:240(LEU)	-0.45	0.02	0.06	0	-0.31	0	-0.23	0	0
A:241(LEU)	0.07	0.01	0.08	0	-0.01	0	0	0	0
A:242(PRO)	0.01	0	0.02	0	0	0	0	0	0
A:243(GLY)	0.02	0	0.03	0	0	0	0	0	0
A:244(TRP)	0.01	0	0.01	0	0	0	0	0	0
A:245(LEU)	0.01	0	0.01	0	0	0	0	0	0
A:246(PRO)	-0.01	0	-0.01	0	0	0	0	0	0
A:247(LEU)	0.02	0.01	0.02	0	0	0	0	0	0
A:248(PRO)	0	0	-0.01	0	0	0	0	0	0
A:249(SER)	0.01	0.01	0.01	0	0	0	0	0	0
A:250(PHE)	0.09	0.01	0.08	0	-0.01	0	0	0	0
A:251(ARG)	0.01	-0.02	0.03	0	0	0	0	0	0
A:252(ARG)	-0.02	-0.02	0	0	0	0	0	0	0
A:253(ARG)	-0.12	-0.1	-0.01	0	-0.01	0	0	0	0
A:254(ASP)	0.06	0.07	-0.01	0	0	0	0	0	0
A:255(ARG)	0	-0.03	0.03	0	0	0	0	0	0
A:256(ALA)	-0.02	0	-0.02	0	0	0	0	0	0
A:257(HIE)	0	-0.03	0.03	0	0	0	0	0	0
A:258(ARG)	0.01	-0.05	0.06	0	0	0	0	0	0
A:259(GLU)	-0.01	0.03	-0.03	0	0	0	0	0	0
A:260(ILE)	0	-0.01	0.01	0	0	0	0	0	0
A:261(LYS)	0	-0.07	0.07	0	0	0	0	0	0
A:262(ASP)	0	0.03	-0.03	0	0	0	0	0	0
A:263(ILE)	0	0	0	0	0	0	0	0	0
A:264(PHE)	0.03	0	0.03	0	0	0	0	0	0
A:265(TYR)	0	0	0	0	0	0	0	0	0
A:266(LYS)	0	-0.02	0.02	0	0	0	0	0	0
A:267(ALA)	0	0	0	0	0	0	0	0	0
A:268(ILE)	0	0	0	0	0	0	0	0	0
A:269(GLN)	0	0	0	0	0	0	0	0	0
A:270(LYS)	0	-0.02	0.02	0	0	0	0	0	0
A:271(ARG)	0	-0.04	0.04	0	0	0	0	0	0
A:272(ARG)	0	-0.04	0.04	0	0	0	0	0	0
A:273(GLN)	0	0	0	0	0	0	0	0	0
A:274(SER)	0	0	0	0	0	0	0	0	0
A:275(GLN)	0	0	0	0	0	0	0	0	0
A:276(GLU)	0	0.01	-0.01	0	0	0	0	0	0
A:277(LYS)	0	-0.02	0.02	0	0	0	0	0	0
A:278(ILE)	0	0	0	0	0	0	0	0	0
A:279(ASP)	0	0.01	-0.02	0	0	0	0	0	0
A:280(ASP)	0	0.03	-0.02	0	0	0	0	0	0
A:281(ILE)	0.01	0	0.01	0	0	0	0	0	0
A:282(LEU)	0.01	0	0.01	0	0	0	0	0	0
A:283(GLN)	0	0	0	0	0	0	0	0	0
A:284(THR)	-0.01	0	-0.01	0	0	0	0	0	0
A:285(LEU)	0.01	0	0.01	0	0	0	0	0	0
A:286(LEU)	0	0	0	0	0	0	0	0	0
A:287(ASP)	0	0.02	-0.02	0	0	0	0	0	0
A:288(ALA)	0	0	0	0	0	0	0	0	0
A:289(THR)	0	0	0	0	0	0	0	0	0
A:290(TYR)	0.01	0	0.01	0	0	0	0	0	0
A:291(LYS)	0	-0.02	0.02	0	0	0	0	0	0
A:292(ASP)	0	0.02	-0.02	0	0	0	0	0	0
A:293(GLY)	0	0	0	0	0	0	0	0	0
A:294(ARG)	0	-0.04	0.04	0	0	0	0	0	0
A:295(PRO)	0	0	0	0	0	0	0	0	0
A:296(LEU)	0	0	0.01	0	0	0	0	0	0
A:297(THR)	0.01	0	0.01	0	0	0	0	0	0
A:298(ASP)	0.01	0.04	-0.04	0	0	0	0	0	0
A:299(ASP)	0.01	0.06	-0.05	0	0	0	0	0	0
A:300(GLU)	0.04	0.06	-0.03	0	0	0	0	0	0
A:301(VAL)	0.03	0.01	0.01	0	0	0	0	0	0
A:302(ALA)	0.03	0.01	0.02	0	0	0	0	0	0
A:303(GLY)	0.05	0.02	0.02	0	0	0	0	0	0
A:304(MET)	0.09	0.03	0.07	0	0	0	0	0	0
A:305(LEU)	0.05	0.01	0.04	0	0	0	0	0	0
A:306(ILE)	0.05	0	0.05	0	-0.01	0	0	0	0
A:307(GLY)	0.1	0.04	0.08	0	-0.03	0	0	0	0
A:308(LEU)	0.13	0.02	0.13	0	-0.02	0	0	0	0
A:309(LEU)	0.04	-0.01	0.06	0	-0.01	0	0	0	0
A:310(LEU)	-0.06	-0.06	0.05	0	-0.06	0	0	0	0
A:311(ALA)	-0.39	-0.11	0.06	0	-0.24	0	-0.1	0	0
A:312(GLY)	0.08	-0.02	0.12	0	-0.02	0	0	0	0
A:313(GLN)	-0.01	-0.02	0.03	0	-0.02	0	0	0	0
A:314(HIE)	-0.13	-0.05	0.12	0	-0.17	0	-0.02	0	0
A:315(THR)	-0.16	0.01	0.05	0	-0.15	0	-0.06	0	0
A:316(SER)	0.06	-0.02	0.09	0	-0.01	0	0	0	0
A:317(SER)	-0.01	-0.01	0.01	0	-0.01	0	0	0	0
A:318(THR)	-0.06	0.01	-0.05	0	-0.01	0	0	0	0
A:319(THR)	0	-0.01	0.02	0	-0.01	0	0	0	0
A:320(SER)	-0.07	0	-0.07	0	0	0	0	0	0
A:321(ALA)	-0.05	0	-0.05	0	0	0	0	0	0
A:322(TRP)	0.17	0.01	0.16	0	-0.01	0	0	0	0
A:323(MET)	0.03	0	0.03	0	0	0	0	0	0
A:324(GLY)	0	0	0	0	0	0	0	0	0
A:325(PHE)	0	0	0	0	0	0	0	0	0
A:326(PHE)	0.03	0	0.03	0	0	0	0	0	0
A:327(LEU)	0	0	0	0	0	0	0	0	0
A:328(ALA)	0	0	-0.01	0	0	0	0	0	0
A:329(ARG)	0	0.03	-0.03	0	0	0	0	0	0
A:330(ASP)	0	-0.02	0.02	0	0	0	0	0	0
A:331(LYS)	0	0.01	-0.01	0	0	0	0	0	0
A:332(THR)	0	0	0	0	0	0	0	0	0
A:333(LEU)	0	0	0	0	0	0	0	0	0
A:334(GLN)	0	0	0	0	0	0	0	0	0
A:335(LYS)	0	0.01	-0.01	0	0	0	0	0	0
A:336(LYS)	0	0.01	-0.01	0	0	0	0	0	0
A:337(CYS)	0	0	0	0	0	0	0	0	0
A:338(TYR)	0	0	0	0	0	0	0	0	0
A:339(LEU)	0	0	0	0	0	0	0	0	0
A:340(GLU)	0	-0.01	0.01	0	0	0	0	0	0
A:341(GLN)	0	0	0	0	0	0	0	0	0
A:342(LYS)	0	0.01	0	0	0	0	0	0	0
A:343(THR)	0	0	0	0	0	0	0	0	0
A:344(VAL)	0	0	0	0	0	0	0	0	0
A:345(CYS)	0	0	0	0	0	0	0	0	0
A:346(GLY)	0	0	0	0	0	0	0	0	0
A:347(GLU)	0	0	0	0	0	0	0	0	0
A:348(ASN)	0	0	0	0	0	0	0	0	0
A:349(LEU)	0	0	0	0	0	0	0	0	0
A:350(PRO)	0	0	0	0	0	0	0	0	0
A:351(PRO)	0	0	0	0	0	0	0	0	0
A:352(LEU)	0	0	0	0	0	0	0	0	0
A:353(THR)	0	0	0	0	0	0	0	0	0
A:354(TYR)	0	0	0.01	0	0	0	0	0	0
A:355(ASP)	0	0	0	0	0	0	0	0	0
A:356(GLN)	0	0	0	0	0	0	0	0	0
A:357(LEU)	0	0	0.01	0	0	0	0	0	0
A:358(LYS)	0	0	0	0	0	0	0	0	0
A:359(ASP)	0	-0.01	0.01	0	0	0	0	0	0
A:360(LEU)	0	0	0	0	0	0	0	0	0
A:361(ASN)	0	0	0.01	0	0	0	0	0	0
A:362(LEU)	0	0	0.01	0	0	0	0	0	0
A:363(LEU)	0.01	0	0.02	0	0	0	0	0	0
A:364(ASP)	0.03	-0.03	0.06	0	0	0	0	0	0
A:365(ARG)	0	0.02	-0.02	0	0	0	0	0	0
A:366(CYS)	0	0	0	0	0	0	0	0	0
A:367(ILE)	0.08	0	0.08	0	0	0	0	0	0
A:368(LYS)	0.05	0.02	0.02	0	0	0	0	0	0
A:369(GLU)	0.03	-0.03	0.06	0	0	0	0	0	0
A:370(THR)	0	0	0	0	0	0	0	0	0
A:371(LEU)	0.09	-0.01	0.1	0	-0.01	0	0	0	0
A:372(ARG)	-0.08	0.04	-0.11	0	0	0	0	0	0
A:373(LEU)	0.01	0	0.01	0	0	0	0	0	0
A:374(ARG)	-0.23	0.06	-0.28	0	-0.01	0	0	0	0
A:375(PRO)	-0.04	0.01	-0.02	0	-0.03	0	0	0	0
A:376(PRO)	-0.09	-0.04	0.09	0	-0.14	0	0	0	0
A:377(ILE)	-3.08	0.05	-0.1	0	-1.59	0	-1.43	0	0
A:378(MET)	-0.08	0.01	0.15	0	-0.24	0	-0.01	0	0
A:379(ILE)	-2.16	-0.21	1.8	0	-2.17	0	-1.57	0	0
A:380(MET)	-0.85	0.17	-0.33	0	-0.53	0	-0.16	0	0
A:381(MET)	-2.68	-0.03	0.37	0	-1.68	0	-1.34	0	0
A:382(ARG)	-0.58	0.24	-0.74	0	-0.08	0	0	0	0
A:383(MET)	0.06	-0.01	0.09	0	-0.02	0	0	0	0
A:384(ALA)	0.07	0	0.07	0	0	0	0	0	0
A:385(ARG)	0.02	-0.01	0.03	0	0	0	0	0	0
A:386(THR)	0.03	0	0.03	0	0	0	0	0	0
A:387(PRO)	-0.01	0	-0.01	0	0	0	0	0	0
A:388(GLN)	0.01	0	0.01	0	0	0	0	0	0
A:389(THR)	-0.01	0	-0.01	0	0	0	0	0	0
A:390(VAL)	0.02	0	0.02	0	0	0	0	0	0
A:391(ALA)	0.01	0	0.01	0	0	0	0	0	0
A:392(GLY)	0	0	0	0	0	0	0	0	0
A:393(TYR)	0	0	0	0	0	0	0	0	0
A:394(THR)	-0.01	0	-0.01	0	0	0	0	0	0
A:395(ILE)	0.02	0	0.02	0	0	0	0	0	0
A:396(PRO)	0.03	0	0.03	0	0	0	0	0	0
A:397(PRO)	-0.03	0	-0.03	0	0	0	0	0	0
A:398(GLY)	-0.02	0.01	-0.02	0	0	0	0	0	0
A:399(HIS)	-0.02	-0.01	0	0	-0.01	0	0	0	0
A:400(GLN)	-0.16	-0.01	-0.08	0	-0.07	0	0	0	0
A:401(VAL)	0.1	-0.02	0.14	0	-0.02	0	0	0	0
A:402(CYS)	-0.27	-0.01	-0.15	0	-0.12	0	0	0	0
A:403(VAL)	0.34	0	0.39	0	-0.04	0	0	0	0
A:404(SER)	-0.21	0	-0.18	0	-0.03	0	0	0	0
A:405(PRO)	-0.06	0.02	-0.05	0	-0.03	0	0	0	0
A:406(THR)	0.14	-0.01	0.16	0	-0.01	0	0	0	0
A:407(VAL)	0	0	0.01	0	-0.01	0	0	0	0
A:408(ASN)	0.01	0.01	0	0	0	0	0	0	0
A:409(GLN)	0.07	0	0.08	0	0	0	0	0	0
A:410(ARG)	-0.02	0.04	-0.06	0	0	0	0	0	0
A:411(LEU)	0.02	0	0.02	0	0	0	0	0	0
A:412(LYS)	0.01	0.01	0	0	0	0	0	0	0
A:413(ASP)	0	-0.01	0.01	0	0	0	0	0	0
A:414(SER)	0	0	0	0	0	0	0	0	0
A:415(TRP)	0.04	0	0.04	0	0	0	0	0	0
A:416(VAL)	0	0	0	0	0	0	0	0	0
A:417(GLU)	0	-0.02	0.02	0	0	0	0	0	0
A:418(ARG)	0	0.02	-0.02	0	0	0	0	0	0
A:419(LEU)	0	0	0.01	0	0	0	0	0	0
A:420(ASP)	0	-0.02	0.02	0	0	0	0	0	0
A:421(PHE)	0.01	0	0.01	0	0	0	0	0	0
A:422(ASN)	-0.01	0	0	0	0	0	0	0	0
A:423(PRO)	0	0	0	0	0	0	0	0	0
A:424(ASP)	0	-0.01	0.02	0	0	0	0	0	0
A:425(ARG)	0	0.03	-0.03	0	0	0	0	0	0
A:426(TYR)	0.01	0	0.01	0	0	0	0	0	0
A:427(LEU)	0	0	0	0	0	0	0	0	0
A:428(GLN)	0	0	0	0	0	0	0	0	0
A:429(ASP)	0	-0.01	0.01	0	0	0	0	0	0
A:430(ASN)	0	0	0	0	0	0	0	0	0
A:431(PRO)	0	0	0	0	0	0	0	0	0
A:432(ALA)	0	0	0	0	0	0	0	0	0
A:433(SER)	0	0	0	0	0	0	0	0	0
A:434(GLY)	0	0	0	0	0	0	0	0	0
A:435(GLU)	0	-0.02	0.02	0	0	0	0	0	0
A:436(LYS)	-0.01	0.02	-0.03	0	0	0	0	0	0
A:437(PHE)	0.01	0	0.02	0	0	0	0	0	0
A:438(ALA)	0.05	0	0.06	0	0	0	0	0	0
A:439(TYR)	-0.06	0	-0.05	0	0	0	0	0	0
A:440(VAL)	0.16	-0.02	0.18	0	-0.01	0	0	0	0
A:441(PRO)	0.13	-0.03	0.18	0	-0.02	0	0	0	0
A:442(PHE)	0.22	0	0.25	0	-0.02	0	0	0	0
A:443(GLY)	-0.09	0.02	-0.09	0	-0.01	0	0	0	0
A:444(ALA)	0.04	0.01	0.04	0	0	0	0	0	0
A:445(GLY)	0.04	0.01	0.03	0	0	0	0	0	0
A:446(ARG)	-0.02	0.03	-0.05	0	0	0	0	0	0
A:447(HIS)	0.01	0.01	0.02	0	-0.02	0	0	0	0
A:448(ARG)	-0.18	0.13	-0.29	0	-0.02	0	0	0	0
A:449(CYS)	0.42	-0.04	0.5	0	-0.03	0	0	0	0
A:450(ILE)	0	-0.01	0.01	0	-0.01	0	0	0	0
A:451(GLY)	-0.11	0.01	-0.12	0	-0.01	0	0	0	0
A:452(GLU)	0.09	-0.04	0.14	0	-0.01	0	0	0	0
A:453(ASN)	0.04	-0.01	0.05	0	0	0	0	0	0
A:454(PHE)	0.01	0	0.01	0	0	0	0	0	0
A:455(ALA)	-0.01	0.01	-0.02	0	0	0	0	0	0
A:456(TYR)	0.07	0	0.07	0	0	0	0	0	0
A:457(VAL)	-0.02	0	-0.02	0	0	0	0	0	0
A:458(GLN)	0.03	0	0.04	0	0	0	0	0	0
A:459(ILE)	0.04	0	0.04	0	0	0	0	0	0
A:460(LYS)	0.01	0.01	0	0	0	0	0	0	0
A:461(THR)	-0.02	0	-0.02	0	0	0	0	0	0
A:462(ILE)	0	0	0	0	0	0	0	0	0
A:463(TRP)	0.03	0	0.03	0	0	0	0	0	0
A:464(SER)	0	0	0	0	0	0	0	0	0
A:465(THR)	-0.01	0	-0.01	0	0	0	0	0	0
A:466(MET)	0	0	0	0	0	0	0	0	0
A:467(LEU)	0	0	0	0	0	0	0	0	0
A:468(ARG)	0	0.01	-0.01	0	0	0	0	0	0
A:469(LEU)	0	0	0	0	0	0	0	0	0
A:470(TYR)	0	0	0	0	0	0	0	0	0
A:471(GLU)	0	-0.01	0.01	0	0	0	0	0	0
A:472(PHE)	0	0	0	0	0	0	0	0	0
A:473(ASP)	0	-0.01	0.01	0	0	0	0	0	0
A:474(LEU)	0	0	0	0	0	0	0	0	0
A:475(ILE)	0	0	0	0	0	0	0	0	0
A:476(ASP)	0	-0.01	0.01	0	0	0	0	0	0
A:477(GLY)	0	0	0	0	0	0	0	0	0
A:478(TYR)	0	0	0	0	0	0	0	0	0
A:479(PHE)	0	0	0	0	0	0	0	0	0
A:480(PRO)	0	0	0	0	0	0	0	0	0
A:481(THR)	0.03	0	0.03	0	0	0	0	0	0
A:482(VAL)	-0.12	0.01	-0.11	0	-0.01	0	0	0	0
A:483(ASN)	0.17	-0.02	0.2	0	-0.02	0	0	0	0
A:484(TYR)	0.25	0	0.32	0	-0.07	0	0	0	0
A:485(THR)	-0.07	-0.01	-0.03	0	-0.04	0	0	0	0
A:486(THR)	0.13	0	0.25	0	-0.12	0	0	0	0
A:487(MET)	-3.41	-0.29	1.26	0	-2.51	0	-1.87	0	0
A:488(ILE)	-1.09	0.02	0.37	0	-0.92	0	-0.56	0	0
A:489(HIS)	-0.09	0.03	0.48	0	-0.51	0	-0.09	0	0
A:490(THR)	0.02	0	0.03	0	-0.02	0	0	0	0
A:491(PRO)	-0.02	0	-0.01	0	0	0	0	0	0
A:492(GLU)	0.07	-0.04	0.11	0	0	0	0	0	0
A:493(ASN)	0.02	0	0.02	0	0	0	0	0	0
A:494(PRO)	0.01	0	0.01	0	0	0	0	0	0
A:495(VAL)	0	0	0	0	0	0	0	0	0
A:496(ILE)	0.01	0	0.01	0	0	0	0	0	0
A:497(ARG)	0	0.01	-0.01	0	0	0	0	0	0
A:498(TYR)	0	0	0	0	0	0	0	0	0
A:499(LYS)	0	0.01	-0.01	0	0	0	0	0	0
A:500(ARG)	0	0	0	0	0	0	0	0	0
A:501(ARG)	0	0.01	-0.01	0	0	0	0	0	0
A:502(SER)	0	0	0	0	0	0	0	0	0
A:601(HEM)	7.47	-0.99	11.59	0	-1.95	0	-1.17	0	0
Z:999(UNK)	-32.45	-2.85	13.55	0	-25.7	-0.08	-17.88	-0.81	0

## Sheet: 3LD6_Pregnenolone
Res	dGbind	Coulomb	Solvation	Covalent	vdW	H-bond	Lipo	Pi-Pi	Contact
_:1(CL)	0	0	0	0	0	0	0	0	0
_:2(CL)	0	0	0	0	0	0	0	0	0
_:3(NA)	0	0	0	0	0	0	0	0	0
_:4(NA)	0	0	0	0	0	0	0	0	0
_:5(NA)	0	0	0	0	0	0	0	0	0
_:6(NA)	0	0	0	0	0	0	0	0	0
_:7(NA)	0	0	0	0	0	0	0	0	0
_:8(NA)	0	0	0	0	0	0	0	0	0
_:9(NA)	0	0	0	0	0	0	0	0	0
_:10(NA)	0	0	0	0	0	0	0	0	0
_:11(NA)	0	0	0	0	0	0	0	0	0
_:12(NA)	0	0	0	0	0	0	0	0	0
_:13(NA)	0	0	0	0	0	0	0	0	0
_:14(NA)	0	0	0	0	0	0	0	0	0
_:15(NA)	0	0	0	0	0	0	0	0	0
_:16(NA)	0	0	0	0	0	0	0	0	0
_:17(NA)	0	0	0	0	0	0	0	0	0
_:18(NA)	0	0	0	0	0	0	0	0	0
_:19(NA)	0	0.01	-0.01	0	0	0	0	0	0
_:20(NA)	0	0	0	0	0	0	0	0	0
_:21(NA)	-0.02	0.03	-0.05	0	0	0	0	0	0
_:22(NA)	0	0	0	0	0	0	0	0	0
_:23(NA)	0	0	0	0	0	0	0	0	0
_:24(NA)	0	0	0	0	0	0	0	0	0
_:25(NA)	0	0	0	0	0	0	0	0	0
_:26(NA)	0	-0.01	0	0	0	0	0	0	0
_:27(NA)	0	0	0	0	0	0	0	0	0
_:28(NA)	0	0	0	0	0	0	0	0	0
_:29(NA)	0	0	0	0	0	0	0	0	0
_:30(NA)	0	0	0	0	0	0	0	0	0
_:31(NA)	0	0	0	0	0	0	0	0	0
_:32(NA)	0	0	0	0	0	0	0	0	0
_:33(NA)	0	0	0	0	0	0	0	0	0
_:34(NA)	0	0	0	0	0	0	0	0	0
_:35(NA)	0	0	0	0	0	0	0	0	0
_:36(NA)	0	0	0	0	0	0	0	0	0
_:37(CL)	0	0	0	0	0	0	0	0	0
_:38(NA)	0	0	0	0	0	0	0	0	0
_:39(CL)	0	0	0	0	0	0	0	0	0
_:40(CL)	0	0	0	0	0	0	0	0	0
_:41(CL)	0	0	0	0	0	0	0	0	0
_:42(CL)	0	0	0	0	0	0	0	0	0
_:43(CL)	0	0	0	0	0	0	0	0	0
_:44(CL)	0	0	0	0	0	0	0	0	0
_:45(CL)	0	0	0	0	0	0	0	0	0
_:46(CL)	0	0	0	0	0	0	0	0	0
_:47(CL)	0	0.01	0	0	0	0	0	0	0
_:48(CL)	0	0	0	0	0	0	0	0	0
_:49(CL)	0	0	0.01	0	0	0	0	0	0
_:50(CL)	0	0	0	0	0	0	0	0	0
_:51(CL)	0	0	0	0	0	0	0	0	0
_:52(CL)	0	0	0	0	0	0	0	0	0
_:53(CL)	0	0	0	0	0	0	0	0	0
_:54(CL)	0	0	0	0	0	0	0	0	0
_:55(CL)	0	0	0	0	0	0	0	0	0
_:56(CL)	0	0	0	0	0	0	0	0	0
_:57(CL)	0	0	0	0	0	0	0	0	0
_:58(CL)	0	0	0.01	0	0	0	0	0	0
_:59(CL)	0	0	0	0	0	0	0	0	0
_:60(CL)	0	0	0	0	0	0	0	0	0
_:61(CL)	0	0	0	0	0	0	0	0	0
_:62(CL)	0	0	0	0	0	0	0	0	0
_:63(CL)	0	0	0	0	0	0	0	0	0
_:64(CL)	0	0	0	0	0	0	0	0	0
_:65(CL)	0	0	0	0	0	0	0	0	0
_:66(CL)	0	0	0	0	0	0	0	0	0
_:67(CL)	0	0	0	0	0	0	0	0	0
_:68(CL)	0	0	0	0	0	0	0	0	0
_:69(CL)	0	0	0	0	0	0	0	0	0
_:70(CL)	0	0	0	0	0	0	0	0	0
_:71(CL)	0	0	0	0	0	0	0	0	0
_:72(CL)	0.01	0	0	0	0	0	0	0	0
A:58(VAL)	0	0	0	0	0	0	0	0	0
A:59(LYS)	0	0.01	-0.01	0	0	0	0	0	0
A:60(SER)	-0.01	0	-0.01	0	0	0	0	0	0
A:61(PRO)	0	0	0	0	0	0	0	0	0
A:62(PRO)	0.01	0	0.01	0	0	0	0	0	0
A:63(TYR)	0	0	0	0	0	0	0	0	0
A:64(ILE)	0.01	0	0	0	0	0	0	0	0
A:65(PHE)	0	0	0	0	0	0	0	0	0
A:66(SER)	0	0	0	0	0	0	0	0	0
A:67(PRO)	0	0	0	0	0	0	0	0	0
A:68(ILE)	0	0	0	0	0	0	0	0	0
A:69(PRO)	0.01	0.01	0	0	0	0	0	0	0
A:70(PHE)	0	0.01	-0.01	0	0	0	0	0	0
A:71(LEU)	0.02	0	0.01	0	0	0	0	0	0
A:72(GLY)	-0.02	-0.01	0	0	0	0	0	0	0
A:73(HIE)	0.04	0.01	0.03	0	0	0	0	0	0
A:74(ALA)	0.01	0	0.01	0	0	0	0	0	0
A:75(ILE)	0	0	0	0	0	0	0	0	0
A:76(ALA)	-0.02	-0.01	-0.01	0	0	0	0	0	0
A:77(PHE)	0.1	0	0.11	0	-0.01	0	0	0	0
A:78(GLY)	0.01	0	0.01	0	0	0	0	0	0
A:79(LYS)	-0.01	-0.02	0.01	0	0	0	0	0	0
A:80(SER)	-0.02	-0.01	-0.01	0	0	0	0	0	0
A:81(PRO)	0.01	-0.01	0.02	0	0	0	0	0	0
A:82(ILE)	0.09	0	0.1	0	0	0	0	0	0
A:83(GLU)	0.03	-0.01	0.04	0	0	0	0	0	0
A:84(PHE)	-0.02	-0.01	-0.01	0	0	0	0	0	0
A:85(LEU)	0.01	0	0.02	0	0	0	0	0	0
A:86(GLU)	0.02	-0.03	0.06	0	0	0	0	0	0
A:87(ASN)	0	-0.01	0	0	0	0	0	0	0
A:88(ALA)	-0.02	0	-0.02	0	0	0	0	0	0
A:89(TYR)	0	0	0	0	0	0	0	0	0
A:90(GLU)	0	-0.02	0.02	0	0	0	0	0	0
A:91(LYS)	0	0	-0.01	0	0	0	0	0	0
A:92(TYR)	0	0	-0.01	0	0	0	0	0	0
A:93(GLY)	0.01	0	0.01	0	0	0	0	0	0
A:94(PRO)	0.01	-0.01	0.02	0	0	0	0	0	0
A:95(VAL)	-0.02	0	-0.02	0	0	0	0	0	0
A:96(PHE)	0.08	-0.01	0.09	0	0	0	0	0	0
A:97(SER)	-0.02	0	-0.02	0	0	0	0	0	0
A:98(PHE)	0.1	0	0.1	0	0	0	0	0	0
A:99(THR)	-0.03	-0.01	-0.02	0	0	0	0	0	0
A:100(MET)	0.04	-0.02	0.07	0	-0.01	0	0	0	0
A:101(VAL)	0.05	0	0.05	0	0	0	0	0	0
A:102(GLY)	0	0	0	0	0	0	0	0	0
A:103(LYS)	-0.02	-0.05	0.03	0	-0.01	0	0	0	0
A:104(THR)	0	0	0	0	0	0	0	0	0
A:105(PHE)	0.1	0	0.12	0	-0.02	0	0	0	0
A:106(THR)	0.03	0	0.04	0	0	0	0	0	0
A:107(TYR)	0.23	0.01	0.23	0	-0.01	0	0	0	0
A:108(LEU)	0.08	-0.01	0.1	0	0	0	0	0	0
A:109(LEU)	0.05	0	0.05	0	0	0	0	0	0
A:110(GLY)	0.07	-0.01	0.08	0	0	0	0	0	0
A:111(SER)	0.03	-0.01	0.04	0	0	0	0	0	0
A:112(ASP)	0	-0.05	0.06	0	0	0	0	0	0
A:113(ALA)	-0.01	0	-0.01	0	0	0	0	0	0
A:114(ALA)	0.06	-0.01	0.07	0	0	0	0	0	0
A:115(ALA)	0.03	-0.01	0.04	0	0	0	0	0	0
A:116(LEU)	-0.02	0	-0.02	0	0	0	0	0	0
A:117(LEU)	0.05	0.02	0.04	0	-0.01	0	0	0	0
A:118(PHE)	0.17	0.01	0.17	0	-0.02	0	0	0	0
A:119(ASN)	0.03	-0.01	0.04	0	0	0	0	0	0
A:120(SER)	0.03	0	0.03	0	0	0	0	0	0
A:121(LYS)	0.05	-0.01	0.06	0	0	0	0	0	0
A:122(ASN)	0.15	-0.03	0.18	0	-0.01	0	0	0	0
A:123(GLU)	0.03	0.01	0.02	0	0	0	0	0	0
A:124(ASP)	-0.02	-0.01	0	0	0	0	0	0	0
A:125(LEU)	-0.04	0	-0.03	0	-0.01	0	0	0	0
A:126(ASN)	0.25	-0.03	0.29	0	-0.01	0	0	0	0
A:127(ALA)	0.16	-0.03	0.27	0	-0.07	0	0	0	0
A:128(GLU)	0.24	0.03	0.24	0	-0.03	0	0	0	0
A:129(ASP)	-0.02	0.02	-0.03	0	-0.02	0	0	0	0
A:130(VAL)	-0.27	0.03	-0.17	0	-0.13	0	0	0	0
A:131(TYR)	-4.83	-0.19	1.69	0	-2.97	0	-3.36	0	0
A:132(SER)	0.14	-0.03	0.27	0	-0.1	0	0	0	0
A:133(ARG)	-0.23	-0.04	-0.11	0	-0.08	0	0	0	0
A:134(LEU)	-3.27	-0.05	0.22	0	-2	0	-1.46	0	0
A:135(THR)	-1.18	0	0.68	0	-1.25	0	-0.61	0	0
A:136(THR)	0.09	0.03	0.12	0	-0.06	0	0	0	0
A:137(PRO)	-0.22	0.01	-0.15	0	-0.08	0	0	0	0
A:138(VAL)	-1.41	-0.02	-0.22	0	-0.7	0	-0.46	0	0
A:139(PHE)	-0.98	-0.08	0.32	0	-0.77	0	-0.45	0	0
A:140(GLY)	0.14	0.06	0.09	0	-0.01	0	0	0	0
A:141(LYS)	0.03	-0.05	0.09	0	-0.01	0	0	0	0
A:142(GLY)	-0.02	0	-0.02	0	0	0	0	0	0
A:143(VAL)	-0.06	-0.04	0.01	0	-0.02	0	0	0	0
A:144(ALA)	-0.27	-0.09	-0.06	0	-0.09	0	-0.03	0	0
A:145(TYR)	-0.17	-0.05	0.47	0	-0.37	0	-0.23	0	0
A:146(ASP)	0.07	0.08	-0.01	0	-0.01	0	0	0	0
A:147(VAL)	0.04	0	0.04	0	-0.01	0	0	0	0
A:148(PRO)	0.04	0.02	0.02	0	0	0	0	0	0
A:149(ASN)	0.18	0.08	0.11	0	-0.01	0	0	0	0
A:150(PRO)	-0.01	0.01	-0.01	0	0	0	0	0	0
A:151(VAL)	0	0	0	0	0	0	0	0	0
A:152(PHE)	0.05	0.02	0.36	0	-0.24	0	-0.1	0	0
A:153(LEU)	0.06	0.02	0.04	0	-0.01	0	0	0	0
A:154(GLU)	0.02	0.08	-0.06	0	0	0	0	0	0
A:155(GLN)	0.05	0.03	0.03	0	-0.01	0	0	0	0
A:156(LYS)	-0.7	-0.66	0.09	0	-0.13	0	0	0	0
A:157(LYS)	0.01	-0.07	0.09	0	0	0	0	0	0
A:158(MET)	-0.04	-0.02	-0.02	0	0	0	0	0	0
A:159(LEU)	0	-0.05	0.07	0	-0.03	0	0	0	0
A:160(LYS)	-0.03	-0.03	0	0	-0.01	0	0	0	0
A:161(SER)	-0.01	-0.01	0.01	0	0	0	0	0	0
A:162(GLY)	-0.06	-0.02	-0.04	0	0	0	0	0	0
A:163(LEU)	0.01	-0.02	0.04	0	-0.01	0	0	0	0
A:164(ASN)	0.04	0	0.05	0	0	0	0	0	0
A:165(ILE)	0.03	0	0.02	0	0	0	0	0	0
A:166(ALA)	0	0	0	0	0	0	0	0	0
A:167(HIP)	-0.02	-0.02	-0.01	0	0	0	0	0	0
A:168(PHE)	0.05	0	0.05	0	0	0	0	0	0
A:169(LYS)	0	0.01	-0.01	0	0	0	0	0	0
A:170(GLN)	0	0	0	0	0	0	0	0	0
A:171(HIE)	0.01	0	0.01	0	0	0	0	0	0
A:172(VAL)	0.01	0	0.01	0	0	0	0	0	0
A:173(SER)	0	0	0	0	0	0	0	0	0
A:174(ILE)	0	0	0	0	0	0	0	0	0
A:175(ILE)	0.01	0	0.01	0	0	0	0	0	0
A:176(GLU)	0.01	-0.03	0.04	0	0	0	0	0	0
A:177(LYS)	0	0.01	-0.02	0	0	0	0	0	0
A:178(GLU)	0	-0.02	0.02	0	0	0	0	0	0
A:179(THR)	0	0	0.01	0	0	0	0	0	0
A:180(LYS)	0	0.02	-0.02	0	0	0	0	0	0
A:181(GLU)	0	-0.02	0.02	0	0	0	0	0	0
A:182(TYR)	0	0	0	0	0	0	0	0	0
A:183(PHE)	0.01	0	0.01	0	0	0	0	0	0
A:184(GLU)	0	-0.02	0.02	0	0	0	0	0	0
A:185(SER)	0	0	0	0	0	0	0	0	0
A:186(TRP)	0	0	0	0	0	0	0	0	0
A:187(GLY)	0	0	0	0	0	0	0	0	0
A:188(GLU)	0	-0.01	0.01	0	0	0	0	0	0
A:189(SER)	0	0	0	0	0	0	0	0	0
A:190(GLY)	0	0	0	0	0	0	0	0	0
A:191(GLU)	0	-0.01	0.01	0	0	0	0	0	0
A:192(LYS)	0	0.02	-0.02	0	0	0	0	0	0
A:193(ASN)	0.01	-0.01	0.01	0	0	0	0	0	0
A:194(VAL)	0.02	0	0.02	0	0	0	0	0	0
A:195(PHE)	0.09	-0.01	0.1	0	0	0	0	0	0
A:196(GLU)	0.03	-0.03	0.06	0	0	0	0	0	0
A:197(ALA)	0	0	0	0	0	0	0	0	0
A:198(LEU)	0.03	0	0.03	0	0	0	0	0	0
A:199(SER)	0.02	-0.01	0.03	0	0	0	0	0	0
A:200(GLU)	0.02	-0.04	0.06	0	0	0	0	0	0
A:201(LEU)	0	0	0	0	0	0	0	0	0
A:202(ILE)	0.04	0.01	0.04	0	0	0	0	0	0
A:203(ILE)	0.07	0	0.07	0	0	0	0	0	0
A:204(LEU)	0	0	0	0	0	0	0	0	0
A:205(THR)	0	0	0	0	0	0	0	0	0
A:206(ALA)	0	0.01	-0.02	0	0	0	0	0	0
A:207(SER)	-0.01	0.01	-0.02	0	0	0	0	0	0
A:208(HIS)	0	0.01	-0.01	0	0	0	0	0	0
A:209(CYS)	-0.05	0.01	-0.06	0	0	0	0	0	0
A:210(LEU)	0.01	0.01	0.01	0	0	0	0	0	0
A:211(HIE)	0.03	-0.02	0.04	0	0	0	0	0	0
A:212(GLY)	0.02	0	0.02	0	0	0	0	0	0
A:213(LYS)	0	0	0.01	0	0	0	0	0	0
A:214(GLU)	0	0.01	-0.01	0	0	0	0	0	0
A:215(ILE)	0.01	0	0.01	0	0	0	0	0	0
A:216(ARG)	0	0.01	-0.02	0	0	0	0	0	0
A:217(SER)	0	0	0	0	0	0	0	0	0
A:218(GLN)	0	0	-0.01	0	0	0	0	0	0
A:219(LEU)	0	0	0.01	0	0	0	0	0	0
A:220(ASN)	0.01	0	0.01	0	0	0	0	0	0
A:221(GLU)	0	-0.01	0.01	0	0	0	0	0	0
A:222(LYS)	0	0	0	0	0	0	0	0	0
A:223(VAL)	0.01	0	0.02	0	0	0	0	0	0
A:224(ALA)	0	0	0.01	0	0	0	0	0	0
A:225(GLN)	0	0	0	0	0	0	0	0	0
A:226(LEU)	0.01	0	0.01	0	0	0	0	0	0
A:227(TYR)	0.12	0	0.13	0	-0.01	0	0	0	0
A:228(ALA)	0.01	0	0.02	0	0	0	0	0	0
A:229(ASP)	0	-0.01	0.01	0	0	0	0	0	0
A:230(LEU)	0.06	-0.01	0.09	0	-0.02	0	0	0	0
A:231(ASP)	0.26	-0.11	0.38	0	-0.02	0	0	0	0
A:232(GLY)	0	0.01	0	0	-0.01	0	0	0	0
A:233(GLY)	-0.1	0.02	-0.1	0	-0.03	0	0	0	0
A:234(PHE)	-2.18	-0.05	0.22	0	-1.12	0	-1.23	0	0
A:235(SER)	0.2	-0.02	0.24	0	-0.03	0	0	0	0
A:236(HIS)	0.33	0.09	0.28	0	-0.04	0	0	0	0
A:237(ALA)	0.05	0.01	0.05	0	0	0	0	0	0
A:238(ALA)	-0.11	-0.01	-0.1	0	-0.01	0	0	0	0
A:239(TRP)	-0.01	0.02	0.22	0	-0.19	0	-0.06	0	0
A:240(LEU)	0.03	-0.01	0.04	0	-0.01	0	0	0	0
A:241(LEU)	0.03	0	0.03	0	0	0	0	0	0
A:242(PRO)	0	0	0	0	0	0	0	0	0
A:243(GLY)	0.01	0	0.02	0	0	0	0	0	0
A:244(TRP)	0.01	0	0.02	0	0	0	0	0	0
A:245(LEU)	0.01	0	0.01	0	0	0	0	0	0
A:246(PRO)	0	0	0	0	0	0	0	0	0
A:247(LEU)	0.01	0	0.01	0	0	0	0	0	0
A:248(PRO)	0	0	0	0	0	0	0	0	0
A:249(SER)	0.01	0	0.01	0	0	0	0	0	0
A:250(PHE)	0.04	0	0.05	0	0	0	0	0	0
A:251(ARG)	0.01	-0.03	0.04	0	0	0	0	0	0
A:252(ARG)	-0.01	-0.01	0	0	0	0	0	0	0
A:253(ARG)	-0.08	-0.01	-0.06	0	-0.01	0	0	0	0
A:254(ASP)	0.04	0.04	0.01	0	0	0	0	0	0
A:255(ARG)	0	-0.02	0.03	0	0	0	0	0	0
A:256(ALA)	-0.02	0	-0.02	0	0	0	0	0	0
A:257(HIE)	-0.01	-0.01	0.01	0	-0.01	0	0	0	0
A:258(ARG)	0.01	-0.05	0.07	0	0	0	0	0	0
A:259(GLU)	-0.01	0.02	-0.03	0	0	0	0	0	0
A:260(ILE)	0	0	0.01	0	0	0	0	0	0
A:261(LYS)	-0.01	-0.09	0.08	0	0	0	0	0	0
A:262(ASP)	0.01	0.03	-0.02	0	0	0	0	0	0
A:263(ILE)	-0.01	0	-0.01	0	0	0	0	0	0
A:264(PHE)	0.04	0	0.04	0	0	0	0	0	0
A:265(TYR)	0.01	0	0.01	0	0	0	0	0	0
A:266(LYS)	0	-0.02	0.02	0	0	0	0	0	0
A:267(ALA)	-0.01	0	0	0	0	0	0	0	0
A:268(ILE)	0.01	0	0.01	0	0	0	0	0	0
A:269(GLN)	0	0	0	0	0	0	0	0	0
A:270(LYS)	0	-0.01	0.01	0	0	0	0	0	0
A:271(ARG)	-0.01	-0.03	0.03	0	0	0	0	0	0
A:272(ARG)	0	-0.05	0.05	0	0	0	0	0	0
A:273(GLN)	0	0	0	0	0	0	0	0	0
A:274(SER)	0	0	0	0	0	0	0	0	0
A:275(GLN)	0	0	0	0	0	0	0	0	0
A:276(GLU)	0	0.01	-0.01	0	0	0	0	0	0
A:277(LYS)	0	-0.02	0.01	0	0	0	0	0	0
A:278(ILE)	0	0	0	0	0	0	0	0	0
A:279(ASP)	0	0.01	-0.01	0	0	0	0	0	0
A:280(ASP)	0.01	0.02	-0.01	0	0	0	0	0	0
A:281(ILE)	0.03	0.01	0.03	0	0	0	0	0	0
A:282(LEU)	0.03	0.01	0.03	0	0	0	0	0	0
A:283(GLN)	0	0	0	0	0	0	0	0	0
A:284(THR)	-0.03	0	-0.03	0	0	0	0	0	0
A:285(LEU)	0.02	0	0.02	0	0	0	0	0	0
A:286(LEU)	0.01	0	0	0	0	0	0	0	0
A:287(ASP)	0	0.03	-0.03	0	0	0	0	0	0
A:288(ALA)	-0.01	-0.01	0	0	0	0	0	0	0
A:289(THR)	-0.01	0	0	0	0	0	0	0	0
A:290(TYR)	0.04	0.01	0.03	0	0	0	0	0	0
A:291(LYS)	0	-0.06	0.06	0	0	0	0	0	0
A:292(ASP)	0	0.05	-0.04	0	0	0	0	0	0
A:293(GLY)	0	0	0	0	0	0	0	0	0
A:294(ARG)	0	-0.08	0.09	0	0	0	0	0	0
A:295(PRO)	-0.01	0	-0.01	0	0	0	0	0	0
A:296(LEU)	0.01	-0.01	0.02	0	0	0	0	0	0
A:297(THR)	0.03	0.01	0.02	0	0	0	0	0	0
A:298(ASP)	0.01	0.05	-0.04	0	0	0	0	0	0
A:299(ASP)	0.02	0.08	-0.05	0	0	0	0	0	0
A:300(GLU)	0.08	0.12	-0.04	0	0	0	0	0	0
A:301(VAL)	0.04	0.02	0.03	0	0	0	0	0	0
A:302(ALA)	0.04	0	0.04	0	0	0	0	0	0
A:303(GLY)	0.06	0	0.06	0	-0.01	0	0	0	0
A:304(MET)	0.1	0.01	0.1	0	-0.02	0	0	0	0
A:305(LEU)	0.02	0	0.03	0	-0.01	0	0	0	0
A:306(ILE)	0.07	-0.04	0.12	0	-0.02	0	0	0	0
A:307(GLY)	0.11	-0.13	0.31	0	-0.07	0	0	0	0
A:308(LEU)	0.05	-0.05	0.15	0	-0.05	0	0	0	0
A:309(LEU)	0.04	-0.04	0.11	0	-0.02	0	0	0	0
A:310(LEU)	-0.17	-0.13	0.12	0	-0.16	0	0	0	0
A:311(ALA)	-1.04	-0.23	0.35	0	-0.85	0	-0.32	0	0
A:312(GLY)	0.17	-0.06	0.31	0	-0.08	0	0	0	0
A:313(GLN)	-0.02	0.01	0.02	0	-0.04	0	0	0	0
A:314(HIE)	-0.26	0.01	0.16	0	-0.39	0	-0.05	0	0
A:315(THR)	-0.28	0.06	0.02	0	-0.26	0	-0.1	0	0
A:316(SER)	-0.03	0.03	-0.05	0	-0.01	0	0	0	0
A:317(SER)	-0.01	0.02	-0.02	0	-0.01	0	0	0	0
A:318(THR)	-0.05	0.04	-0.08	0	-0.01	0	0	0	0
A:319(THR)	0	0.02	-0.01	0	-0.01	0	0	0	0
A:320(SER)	-0.06	0.02	-0.08	0	0	0	0	0	0
A:321(ALA)	-0.03	0.01	-0.04	0	0	0	0	0	0
A:322(TRP)	0.07	0.01	0.07	0	-0.01	0	0	0	0
A:323(MET)	0.02	0.01	0.02	0	0	0	0	0	0
A:324(GLY)	0	0	-0.01	0	0	0	0	0	0
A:325(PHE)	0.01	0.01	0	0	0	0	0	0	0
A:326(PHE)	0.03	0.01	0.02	0	0	0	0	0	0
A:327(LEU)	0	0	0	0	0	0	0	0	0
A:328(ALA)	0	0	-0.01	0	0	0	0	0	0
A:329(ARG)	0	0.05	-0.05	0	0	0	0	0	0
A:330(ASP)	0	-0.04	0.04	0	0	0	0	0	0
A:331(LYS)	0	0.02	-0.02	0	0	0	0	0	0
A:332(THR)	0	0	0	0	0	0	0	0	0
A:333(LEU)	0	0	0	0	0	0	0	0	0
A:334(GLN)	0	0	0	0	0	0	0	0	0
A:335(LYS)	0	0.02	-0.02	0	0	0	0	0	0
A:336(LYS)	0	0.03	-0.03	0	0	0	0	0	0
A:337(CYS)	0	0	0	0	0	0	0	0	0
A:338(TYR)	0	0	0	0	0	0	0	0	0
A:339(LEU)	0	0	0	0	0	0	0	0	0
A:340(GLU)	0	-0.03	0.03	0	0	0	0	0	0
A:341(GLN)	0	0	0	0	0	0	0	0	0
A:342(LYS)	0	0.02	-0.02	0	0	0	0	0	0
A:343(THR)	0	0	0	0	0	0	0	0	0
A:344(VAL)	0	0	0	0	0	0	0	0	0
A:345(CYS)	0	0	0	0	0	0	0	0	0
A:346(GLY)	0	0	0	0	0	0	0	0	0
A:347(GLU)	0	-0.02	0.01	0	0	0	0	0	0
A:348(ASN)	0	0	0	0	0	0	0	0	0
A:349(LEU)	0	0	0	0	0	0	0	0	0
A:350(PRO)	0	0	0	0	0	0	0	0	0
A:351(PRO)	0	0	0	0	0	0	0	0	0
A:352(LEU)	0	0	0	0	0	0	0	0	0
A:353(THR)	0	0	0.01	0	0	0	0	0	0
A:354(TYR)	0.01	0	0.01	0	0	0	0	0	0
A:355(ASP)	0	-0.02	0.02	0	0	0	0	0	0
A:356(GLN)	0	0	0	0	0	0	0	0	0
A:357(LEU)	0.01	0	0.01	0	0	0	0	0	0
A:358(LYS)	0	0.02	-0.02	0	0	0	0	0	0
A:359(ASP)	0	-0.03	0.02	0	0	0	0	0	0
A:360(LEU)	0	0	0.01	0	0	0	0	0	0
A:361(ASN)	0.01	-0.01	0.01	0	0	0	0	0	0
A:362(LEU)	0.01	0	0.01	0	0	0	0	0	0
A:363(LEU)	0.03	-0.01	0.04	0	0	0	0	0	0
A:364(ASP)	0.06	-0.07	0.14	0	0	0	0	0	0
A:365(ARG)	0.01	0.06	-0.05	0	0	0	0	0	0
A:366(CYS)	0	0	0	0	0	0	0	0	0
A:367(ILE)	0.08	-0.01	0.09	0	0	0	0	0	0
A:368(LYS)	0.02	0.07	-0.05	0	0	0	0	0	0
A:369(GLU)	0.03	-0.07	0.1	0	0	0	0	0	0
A:370(THR)	-0.02	0.01	-0.02	0	0	0	0	0	0
A:371(LEU)	0.06	-0.01	0.07	0	-0.01	0	0	0	0
A:372(ARG)	-0.07	0.1	-0.17	0	0	0	0	0	0
A:373(LEU)	-0.01	0	-0.01	0	0	0	0	0	0
A:374(ARG)	-0.12	0.07	-0.18	0	0	0	0	0	0
A:375(PRO)	-0.17	0.04	-0.19	0	-0.02	0	0	0	0
A:376(PRO)	-0.12	0.06	-0.04	0	-0.13	0	0	0	0
A:377(ILE)	-2.8	0.05	-0.09	0	-1.44	0	-1.31	0	0
A:378(MET)	-0.2	-0.15	0.16	0	-0.2	0	-0.01	0	0
A:379(ILE)	-1.36	-2.6	2.23	0	-0.54	-0.23	-0.22	0	0
A:380(MET)	-1.65	0.11	-0.65	0	-0.74	0	-0.36	0	0
A:381(MET)	-0.77	-0.17	0.36	0	-0.67	0	-0.29	0	0
A:382(ARG)	-1.02	0.37	-1.26	0	-0.14	0	0	0	0
A:383(MET)	0.08	-0.01	0.1	0	-0.01	0	0	0	0
A:384(ALA)	0.02	0	0.02	0	0	0	0	0	0
A:385(ARG)	0	-0.02	0.02	0	0	0	0	0	0
A:386(THR)	0.03	-0.01	0.04	0	0	0	0	0	0
A:387(PRO)	-0.01	0	-0.01	0	0	0	0	0	0
A:388(GLN)	0.01	0	0.01	0	0	0	0	0	0
A:389(THR)	0	0	0	0	0	0	0	0	0
A:390(VAL)	0.01	0	0.01	0	0	0	0	0	0
A:391(ALA)	0	0	0	0	0	0	0	0	0
A:392(GLY)	0	0	0	0	0	0	0	0	0
A:393(TYR)	0	0	0	0	0	0	0	0	0
A:394(THR)	-0.01	0	-0.01	0	0	0	0	0	0
A:395(ILE)	0.01	0	0.01	0	0	0	0	0	0
A:396(PRO)	0.01	0	0.02	0	0	0	0	0	0
A:397(PRO)	-0.02	0	-0.02	0	0	0	0	0	0
A:398(GLY)	-0.02	0.01	-0.02	0	0	0	0	0	0
A:399(HIS)	0.01	0	0.02	0	0	0	0	0	0
A:400(GLN)	-0.04	0	-0.01	0	-0.02	0	0	0	0
A:401(VAL)	0.14	-0.03	0.18	0	-0.01	0	0	0	0
A:402(CYS)	-0.08	0.07	-0.13	0	-0.02	0	0	0	0
A:403(VAL)	0.21	-0.07	0.31	0	-0.03	0	0	0	0
A:404(SER)	-0.08	0.04	-0.1	0	-0.02	0	0	0	0
A:405(PRO)	-0.07	0.05	-0.08	0	-0.04	0	0	0	0
A:406(THR)	0.12	-0.02	0.15	0	-0.01	0	0	0	0
A:407(VAL)	0.01	0.01	0	0	0	0	0	0	0
A:408(ASN)	-0.01	0.03	-0.04	0	0	0	0	0	0
A:409(GLN)	0.06	0.01	0.06	0	0	0	0	0	0
A:410(ARG)	-0.01	0.07	-0.08	0	0	0	0	0	0
A:411(LEU)	0.02	0	0.02	0	0	0	0	0	0
A:412(LYS)	0	0.03	-0.02	0	0	0	0	0	0
A:413(ASP)	0	-0.04	0.04	0	0	0	0	0	0
A:414(SER)	0	0	-0.01	0	0	0	0	0	0
A:415(TRP)	0.03	0.01	0.02	0	0	0	0	0	0
A:416(VAL)	0	0	0.01	0	0	0	0	0	0
A:417(GLU)	0	-0.03	0.03	0	0	0	0	0	0
A:418(ARG)	0	0.04	-0.04	0	0	0	0	0	0
A:419(LEU)	0	0	0	0	0	0	0	0	0
A:420(ASP)	0	-0.04	0.04	0	0	0	0	0	0
A:421(PHE)	0.01	0	0.01	0	0	0	0	0	0
A:422(ASN)	0	0	0	0	0	0	0	0	0
A:423(PRO)	0	0	0	0	0	0	0	0	0
A:424(ASP)	0	-0.04	0.04	0	0	0	0	0	0
A:425(ARG)	0	0.08	-0.08	0	0	0	0	0	0
A:426(TYR)	0.02	0	0.02	0	0	0	0	0	0
A:427(LEU)	0	0	0	0	0	0	0	0	0
A:428(GLN)	0	0	0	0	0	0	0	0	0
A:429(ASP)	0	-0.03	0.03	0	0	0	0	0	0
A:430(ASN)	0	0	0	0	0	0	0	0	0
A:431(PRO)	0	0	0	0	0	0	0	0	0
A:432(ALA)	0	0	0	0	0	0	0	0	0
A:433(SER)	0	0	0	0	0	0	0	0	0
A:434(GLY)	0	0	0	0	0	0	0	0	0
A:435(GLU)	0.01	-0.06	0.06	0	0	0	0	0	0
A:436(LYS)	-0.01	0.04	-0.05	0	0	0	0	0	0
A:437(PHE)	0.02	-0.01	0.03	0	0	0	0	0	0
A:438(ALA)	0.02	-0.01	0.03	0	0	0	0	0	0
A:439(TYR)	-0.02	0	-0.02	0	0	0	0	0	0
A:440(VAL)	0.08	-0.03	0.12	0	-0.01	0	0	0	0
A:441(PRO)	0.05	-0.05	0.11	0	-0.01	0	0	0	0
A:442(PHE)	0.19	0.02	0.2	0	-0.03	0	0	0	0
A:443(GLY)	-0.13	0.04	-0.15	0	-0.02	0	0	0	0
A:444(ALA)	0.23	-0.03	0.27	0	-0.01	0	0	0	0
A:445(GLY)	0.04	-0.01	0.05	0	0	0	0	0	0
A:446(ARG)	-0.08	0.07	-0.14	0	-0.01	0	0	0	0
A:447(HIS)	0.03	0.03	0.06	0	-0.06	0	0	0	0
A:448(ARG)	-0.11	0.2	-0.28	0	-0.03	0	0	0	0
A:449(CYS)	0.65	-0.11	0.83	0	-0.07	0	0	0	0
A:450(ILE)	-0.09	0.02	-0.05	0	-0.06	0	0	0	0
A:451(GLY)	-0.15	0.05	-0.19	0	-0.01	0	0	0	0
A:452(GLU)	0.13	-0.11	0.25	0	-0.01	0	0	0	0
A:453(ASN)	0.06	-0.01	0.07	0	0	0	0	0	0
A:454(PHE)	0.04	0.01	0.03	0	-0.01	0	0	0	0
A:455(ALA)	-0.04	0.02	-0.06	0	0	0	0	0	0
A:456(TYR)	0.09	0	0.09	0	0	0	0	0	0
A:457(VAL)	-0.01	0	-0.02	0	0	0	0	0	0
A:458(GLN)	0.02	-0.01	0.03	0	0	0	0	0	0
A:459(ILE)	0.05	0.01	0.04	0	0	0	0	0	0
A:460(LYS)	0	0.06	-0.05	0	0	0	0	0	0
A:461(THR)	-0.03	0.01	-0.03	0	0	0	0	0	0
A:462(ILE)	0.01	0.01	0	0	0	0	0	0	0
A:463(TRP)	0.04	0.01	0.03	0	0	0	0	0	0
A:464(SER)	0	0	-0.01	0	0	0	0	0	0
A:465(THR)	-0.01	0.01	-0.01	0	0	0	0	0	0
A:466(MET)	0	0	0	0	0	0	0	0	0
A:467(LEU)	0	0	0	0	0	0	0	0	0
A:468(ARG)	0	0.04	-0.04	0	0	0	0	0	0
A:469(LEU)	0	0	0	0	0	0	0	0	0
A:470(TYR)	0	0	0	0	0	0	0	0	0
A:471(GLU)	0	-0.02	0.02	0	0	0	0	0	0
A:472(PHE)	0	0	0	0	0	0	0	0	0
A:473(ASP)	0	-0.02	0.02	0	0	0	0	0	0
A:474(LEU)	0	0	0	0	0	0	0	0	0
A:475(ILE)	0	0	0	0	0	0	0	0	0
A:476(ASP)	0	-0.01	0.01	0	0	0	0	0	0
A:477(GLY)	0	0	0	0	0	0	0	0	0
A:478(TYR)	0	0	0	0	0	0	0	0	0
A:479(PHE)	0	0	0	0	0	0	0	0	0
A:480(PRO)	0	0	0	0	0	0	0	0	0
A:481(THR)	0.02	-0.01	0.02	0	0	0	0	0	0
A:482(VAL)	-0.07	0.01	-0.07	0	0	0	0	0	0
A:483(ASN)	0.09	0.03	0.07	0	-0.01	0	0	0	0
A:484(TYR)	0.08	0.02	0.07	0	-0.01	0	0	0	0
A:485(THR)	-0.03	0.03	-0.06	0	-0.01	0	0	0	0
A:486(THR)	-0.12	0	-0.08	0	-0.03	0	0	0	0
A:487(MET)	-1.35	-0.44	0.51	0	-0.91	-0.04	-0.47	0	0
A:488(ILE)	-0.55	0.09	0.13	0	-0.47	0	-0.29	0	0
A:489(HIS)	0.24	0.03	0.35	0	-0.12	0	-0.02	0	0
A:490(THR)	0.07	0.01	0.07	0	-0.01	0	0	0	0
A:491(PRO)	0.01	0	0.01	0	0	0	0	0	0
A:492(GLU)	0.04	0.01	0.04	0	0	0	0	0	0
A:493(ASN)	0	0	0	0	0	0	0	0	0
A:494(PRO)	0.01	0	0.01	0	0	0	0	0	0
A:495(VAL)	0	0	0	0	0	0	0	0	0
A:496(ILE)	0.01	0	0.01	0	0	0	0	0	0
A:497(ARG)	0	0.02	-0.02	0	0	0	0	0	0
A:498(TYR)	0	0	0	0	0	0	0	0	0
A:499(LYS)	0	0.02	-0.01	0	0	0	0	0	0
A:500(ARG)	0	0.02	-0.02	0	0	0	0	0	0
A:501(ARG)	0	0.03	-0.03	0	0	0	0	0	0
A:502(SER)	0	0	0	0	0	0	0	0	0
A:601(HEM)	11.21	-1.63	19.18	0	-4.03	0	-2.31	0	0
Z:999(UNK)	-30.29	-5.55	11.04	0	-23.11	-0.28	-13.76	0	0

## Sheet: 6UEZ_Lanosterol
Res	dGbind	Coulomb	Solvation	Covalent	vdW	H-bond	Lipo	Pi-Pi	Contact
_:1(CL)	0	0	0.01	0	0	0	0	0	0
_:2(CL)	0	0	0	0	0	0	0	0	0
_:3(NA)	0	0	0	0	0	0	0	0	0
_:4(NA)	0	0	0	0	0	0	0	0	0
_:5(NA)	0	0	0	0	0	0	0	0	0
_:6(NA)	0	0	0	0	0	0	0	0	0
_:7(NA)	0	0	0	0	0	0	0	0	0
_:8(NA)	0	0	0	0	0	0	0	0	0
_:9(NA)	0	0	0	0	0	0	0	0	0
_:10(NA)	0	0	0	0	0	0	0	0	0
_:11(NA)	0	0	0	0	0	0	0	0	0
_:12(NA)	0	0	0	0	0	0	0	0	0
_:13(NA)	0	0	0	0	0	0	0	0	0
_:14(NA)	0	0	0	0	0	0	0	0	0
_:15(NA)	0	0	0	0	0	0	0	0	0
_:16(NA)	0	0	0	0	0	0	0	0	0
_:17(NA)	0	0	0	0	0	0	0	0	0
_:18(NA)	0	0	0	0	0	0	0	0	0
_:19(NA)	0	0	0	0	0	0	0	0	0
_:20(NA)	0	0	0	0	0	0	0	0	0
_:21(NA)	0	0	0	0	0	0	0	0	0
_:22(NA)	0	0	0	0	0	0	0	0	0
_:23(NA)	0	0	0	0	0	0	0	0	0
_:24(NA)	0	0	0	0	0	0	0	0	0
_:25(NA)	0	0	0	0	0	0	0	0	0
_:26(NA)	0	0	0	0	0	0	0	0	0
_:27(NA)	0	0	0	0	0	0	0	0	0
_:28(NA)	0	0	0	0	0	0	0	0	0
_:29(NA)	0	0	0	0	0	0	0	0	0
_:30(NA)	0	0	0	0	0	0	0	0	0
_:31(NA)	0	0	0	0	0	0	0	0	0
_:32(NA)	0	0	0	0	0	0	0	0	0
_:33(NA)	0	0	0	0	0	0	0	0	0
_:34(NA)	0	0	0	0	0	0	0	0	0
_:35(NA)	0	0	0	0	0	0	0	0	0
_:36(NA)	0	0	0	0	0	0	0	0	0
_:37(NA)	0	0	0	0	0	0	0	0	0
_:38(NA)	0	0	0	0	0	0	0	0	0
_:39(NA)	0	0	0	0	0	0	0	0	0
_:40(NA)	0	0	0	0	0	0	0	0	0
_:41(NA)	0	0	0	0	0	0	0	0	0
_:42(NA)	0	0	0	0	0	0	0	0	0
_:43(NA)	0	0	0	0	0	0	0	0	0
_:44(NA)	0	0	0	0	0	0	0	0	0
_:45(NA)	0	0	0	0	0	0	0	0	0
_:46(NA)	0	0	0	0	0	0	0	0	0
_:47(NA)	0	0	0	0	0	0	0	0	0
_:48(NA)	0	0	0	0	0	0	0	0	0
_:49(NA)	0	0	0	0	0	0	0	0	0
_:50(NA)	0	0	0	0	0	0	0	0	0
_:51(NA)	0	0	0	0	0	0	0	0	0
_:52(NA)	0	0	0	0	0	0	0	0	0
_:53(CL)	0	0	0	0	0	0	0	0	0
_:54(NA)	0	0	0	0	0	0	0	0	0
_:55(CL)	0	0	0	0	0	0	0	0	0
_:56(CL)	0.01	0	0.01	0	0	0	0	0	0
_:57(CL)	0	0	0	0	0	0	0	0	0
_:58(CL)	0.01	0	0.01	0	0	0	0	0	0
_:59(CL)	0	0	0	0	0	0	0	0	0
_:60(CL)	0	0	0	0	0	0	0	0	0
_:61(CL)	0.01	0	0	0	0	0	0	0	0
_:62(CL)	0	0	0	0	0	0	0	0	0
_:63(CL)	0	0	0	0	0	0	0	0	0
_:64(CL)	0	0	0	0	0	0	0	0	0
_:65(CL)	0	0	0	0	0	0	0	0	0
_:66(CL)	0	0	0	0	0	0	0	0	0
_:67(CL)	0	0	0	0	0	0	0	0	0
_:68(CL)	0	0	0	0	0	0	0	0	0
_:69(CL)	0	0	0	0	0	0	0	0	0
_:70(CL)	0	0	0	0	0	0	0	0	0
_:71(CL)	0	0	0	0	0	0	0	0	0
_:72(CL)	0	0	0	0	0	0	0	0	0
_:73(CL)	0	0	0	0	0	0	0	0	0
_:74(CL)	0	0	0	0	0	0	0	0	0
_:75(CL)	0	0	0	0	0	0	0	0	0
_:76(CL)	0	0	0	0	0	0	0	0	0
_:77(CL)	0	0	0	0	0	0	0	0	0
_:78(CL)	0.01	0	0.02	0	0	0	0	0	0
_:79(CL)	0	0	0	0	0	0	0	0	0
_:80(CL)	0	0	0	0	0	0	0	0	0
_:81(CL)	0	0	0	0	0	0	0	0	0
_:82(CL)	0	0	0	0	0	0	0	0	0
_:83(CL)	0	0	0.01	0	0	0	0	0	0
_:84(CL)	0	0	0	0	0	0	0	0	0
_:85(CL)	0	0	0	0	0	0	0	0	0
_:86(CL)	0	0	0	0	0	0	0	0	0
_:87(CL)	0.01	0	0.01	0	0	0	0	0	0
_:88(CL)	0	0	0	0	0	0	0	0	0
_:89(CL)	0	0	0	0	0	0	0	0	0
_:90(CL)	0	0	0.01	0	0	0	0	0	0
_:91(CL)	0.01	0	0.01	0	0	0	0	0	0
_:92(CL)	0	0	0	0	0	0	0	0	0
_:93(CL)	0.01	0.01	0	0	0	0	0	0	0
_:94(CL)	0	0	0	0	0	0	0	0	0
_:95(CL)	0	0	0	0	0	0	0	0	0
_:96(CL)	0	0	0	0	0	0	0	0	0
_:97(CL)	0	0	0	0	0	0	0	0	0
_:98(CL)	0.01	0	0.01	0	0	0	0	0	0
_:99(CL)	0	0	0	0	0	0	0	0	0
_:100(CL)	0	0	0	0	0	0	0	0	0
_:101(CL)	0	0	0	0	0	0	0	0	0
_:102(CL)	0	0	0	0	0	0	0	0	0
_:103(CL)	0	0	0	0	0	0	0	0	0
_:104(CL)	0.01	0	0.01	0	0	0	0	0	0
A:57(LYS)	0	0.01	-0.01	0	0	0	0	0	0
A:58(GLY)	0	0	0	0	0	0	0	0	0
A:59(LYS)	0	0	0	0	0	0	0	0	0
A:60(LEU)	-0.01	0	-0.01	0	0	0	0	0	0
A:61(PRO)	0	0	0	0	0	0	0	0	0
A:62(PRO)	0.01	0	0.01	0	0	0	0	0	0
A:63(TYR)	-0.01	0	-0.01	0	0	0	0	0	0
A:64(ILE)	0.01	0	0.01	0	0	0	0	0	0
A:65(PHE)	0	0	0	0	0	0	0	0	0
A:66(SER)	0	0	0	0	0	0	0	0	0
A:67(PRO)	0	0	0	0	0	0	0	0	0
A:68(ILE)	0	0	0	0	0	0	0	0	0
A:69(PRO)	0	0	-0.01	0	0	0	0	0	0
A:70(PHE)	0.01	0.01	0.01	0	0	0	0	0	0
A:71(LEU)	0.03	0.01	0.02	0	0	0	0	0	0
A:72(GLY)	-0.03	0	-0.03	0	0	0	0	0	0
A:73(HIE)	0.03	0.01	0.02	0	0	0	0	0	0
A:74(ALA)	0.01	0.02	0	0	0	0	0	0	0
A:75(ILE)	0.04	0.01	0.03	0	0	0	0	0	0
A:76(ALA)	0	0	0	0	0	0	0	0	0
A:77(PHE)	0.18	0.02	0.18	0	-0.01	0	0	0	0
A:78(GLY)	0.01	0	0.01	0	0	0	0	0	0
A:79(LYS)	-0.01	-0.06	0.05	0	0	0	0	0	0
A:80(SER)	-0.04	-0.01	-0.03	0	0	0	0	0	0
A:81(PRO)	0.01	-0.02	0.04	0	0	0	0	0	0
A:82(ILE)	0.15	-0.01	0.16	0	0	0	0	0	0
A:83(GLU)	0.05	0.03	0.02	0	0	0	0	0	0
A:84(PHE)	-0.03	-0.01	-0.01	0	0	0	0	0	0
A:85(LEU)	0.02	-0.01	0.03	0	0	0	0	0	0
A:86(GLU)	0.03	0.01	0.02	0	0	0	0	0	0
A:87(ASN)	0	-0.01	0.01	0	0	0	0	0	0
A:88(ALA)	-0.03	0	-0.02	0	0	0	0	0	0
A:89(TYR)	0	0	0	0	0	0	0	0	0
A:90(GLU)	0	0	0	0	0	0	0	0	0
A:91(LYS)	0	-0.02	0.01	0	0	0	0	0	0
A:92(TYR)	0	0	0	0	0	0	0	0	0
A:93(GLY)	0.01	0	0.01	0	0	0	0	0	0
A:94(PRO)	0.01	0	0.02	0	0	0	0	0	0
A:95(VAL)	-0.03	0	-0.03	0	0	0	0	0	0
A:96(PHE)	0.1	-0.01	0.11	0	0	0	0	0	0
A:97(SER)	-0.05	0	-0.04	0	0	0	0	0	0
A:98(PHE)	0.13	0	0.13	0	0	0	0	0	0
A:99(THR)	-0.01	0	-0.01	0	0	0	0	0	0
A:100(MET)	0.03	0	0.03	0	-0.01	0	0	0	0
A:101(VAL)	0.04	0.01	0.03	0	0	0	0	0	0
A:102(GLY)	0.01	0	0.01	0	0	0	0	0	0
A:103(LYS)	0.02	-0.07	0.1	0	0	0	0	0	0
A:104(THR)	-0.06	0	-0.06	0	0	0	0	0	0
A:105(PHE)	0.14	0.01	0.14	0	-0.01	0	0	0	0
A:106(THR)	0.05	0	0.05	0	0	0	0	0	0
A:107(TYR)	0.39	0.01	0.4	0	-0.01	0	0	0	0
A:108(LEU)	0.12	0	0.12	0	0	0	0	0	0
A:109(LEU)	0.08	0	0.08	0	0	0	0	0	0
A:110(GLY)	0.08	-0.01	0.09	0	0	0	0	0	0
A:111(SER)	0.04	-0.01	0.05	0	0	0	0	0	0
A:112(ASP)	0.01	-0.04	0.05	0	0	0	0	0	0
A:113(ALA)	-0.02	-0.01	-0.01	0	0	0	0	0	0
A:114(ALA)	0.07	-0.01	0.08	0	0	0	0	0	0
A:115(ALA)	0.07	-0.01	0.08	0	0	0	0	0	0
A:116(LEU)	-0.01	0	0	0	0	0	0	0	0
A:117(LEU)	0.01	0	0.02	0	-0.01	0	0	0	0
A:118(PHE)	0.3	0	0.31	0	-0.01	0	0	0	0
A:119(ASN)	0.03	-0.01	0.04	0	0	0	0	0	0
A:120(SER)	-0.03	-0.01	-0.02	0	0	0	0	0	0
A:121(LYS)	0.07	0.04	0.04	0	0	0	0	0	0
A:122(ASN)	0.23	-0.01	0.25	0	-0.01	0	0	0	0
A:123(GLU)	0.04	-0.03	0.08	0	0	0	0	0	0
A:124(ASP)	-0.05	-0.03	-0.01	0	0	0	0	0	0
A:125(LEU)	-0.07	-0.01	-0.05	0	-0.01	0	0	0	0
A:126(ASN)	0.31	0	0.33	0	-0.01	0	0	0	0
A:127(ALA)	0.3	0.02	0.35	0	-0.07	0	0	0	0
A:128(GLU)	0.64	-0.04	0.72	0	-0.04	0	0	0	0
A:129(ASP)	-0.01	0	0	0	-0.02	0	0	0	0
A:130(VAL)	-0.35	0.07	-0.32	0	-0.09	0	0	0	0
A:131(TYR)	-3.24	-0.14	1.52	0	-2.24	0	-2.39	0	0
A:132(SER)	0.07	0.02	0.11	0	-0.06	0	0	0	0
A:133(ARG)	-0.25	-0.14	-0.06	0	-0.05	0	0	0	0
A:134(LEU)	-1.64	-0.02	-0.23	0	-0.87	0	-0.52	0	0
A:135(THR)	-1.01	-0.03	0.57	0	-0.95	0	-0.59	0	0
A:136(THR)	0.21	-0.01	0.27	0	-0.05	0	0	0	0
A:137(PRO)	-0.19	-0.02	-0.14	0	-0.03	0	0	0	0
A:138(VAL)	-0.37	-0.02	-0.24	0	-0.11	0	0	0	0
A:139(PHE)	-3.7	-0.03	0.57	0	-1.89	0	-2.35	0	0
A:140(GLY)	0.32	-0.01	0.36	0	-0.03	0	0	0	0
A:141(LYS)	0.02	-0.02	0.06	0	-0.02	0	0	0	0
A:142(GLY)	-0.06	-0.01	-0.02	0	-0.03	0	0	0	0
A:143(VAL)	-1.45	0.06	-0.44	0	-0.65	0	-0.42	0	0
A:144(ALA)	-1.71	-0.08	-0.11	0	-0.92	0	-0.6	0	0
A:145(TYR)	-1.3	-0.12	1.45	0	-1.5	0	-1.12	0	0
A:146(ASP)	0.11	0	0.14	0	-0.03	0	0	0	0
A:147(VAL)	0.15	0	0.18	0	-0.03	0	0	0	0
A:148(PRO)	0.12	0	0.13	0	-0.01	0	0	0	0
A:149(ASN)	0.24	0	0.26	0	-0.02	0	0	0	0
A:150(PRO)	-0.02	0	-0.01	0	-0.01	0	0	0	0
A:151(VAL)	-0.01	-0.01	0.02	0	-0.02	0	0	0	0
A:152(PHE)	-1.77	-0.04	0.47	0	-1.08	0	-1.12	0	0
A:153(LEU)	0.09	0	0.12	0	-0.02	0	0	0	0
A:154(GLU)	0.04	-0.04	0.1	0	-0.02	0	0	0	0
A:155(GLN)	-0.23	-0.04	0.32	0	-0.42	0	-0.1	0	0
A:156(LYS)	-1.04	0.06	-0.74	0	-0.36	0	0	0	0
A:157(LYS)	-0.05	0.05	-0.08	0	-0.02	0	0	0	0
A:158(MET)	-0.13	0	-0.11	0	-0.03	0	0	0	0
A:159(LEU)	-0.8	0	0.1	0	-0.52	0	-0.38	0	0
A:160(LYS)	-0.03	0.06	-0.08	0	-0.01	0	0	0	0
A:161(SER)	0	0	0	0	0	0	0	0	0
A:162(GLY)	-0.12	0	-0.12	0	0	0	0	0	0
A:163(LEU)	0.02	0	0.06	0	-0.04	0	0	0	0
A:164(ASN)	0.11	0	0.11	0	0	0	0	0	0
A:165(ILE)	0.04	0	0.04	0	0	0	0	0	0
A:166(ALA)	0	0	0	0	0	0	0	0	0
A:167(HIS)	-0.02	0	-0.02	0	0	0	0	0	0
A:168(PHE)	0.15	0	0.15	0	0	0	0	0	0
A:169(LYS)	0.02	0.03	-0.01	0	0	0	0	0	0
A:170(GLN)	-0.02	0	-0.02	0	0	0	0	0	0
A:171(HIE)	0.09	0	0.09	0	0	0	0	0	0
A:172(VAL)	0.04	0	0.04	0	0	0	0	0	0
A:173(SER)	0.01	0	0.01	0	0	0	0	0	0
A:174(ILE)	-0.02	0	-0.02	0	0	0	0	0	0
A:175(ILE)	0.04	0	0.03	0	0	0	0	0	0
A:176(GLU)	0.03	-0.01	0.04	0	0	0	0	0	0
A:177(LYS)	0	0.01	-0.02	0	0	0	0	0	0
A:178(GLU)	-0.01	-0.01	0	0	0	0	0	0	0
A:179(THR)	0.01	0	0.01	0	0	0	0	0	0
A:180(LYS)	0.01	0.01	-0.01	0	0	0	0	0	0
A:181(GLU)	0	-0.01	0.01	0	0	0	0	0	0
A:182(TYR)	0	0	0	0	0	0	0	0	0
A:183(PHE)	0.03	0	0.02	0	0	0	0	0	0
A:184(GLU)	0	0	0	0	0	0	0	0	0
A:185(SER)	0	0	0	0	0	0	0	0	0
A:186(TRP)	0.01	0	0.01	0	0	0	0	0	0
A:187(GLY)	0	0	0	0	0	0	0	0	0
A:188(GLU)	0	0	0	0	0	0	0	0	0
A:189(SER)	0	0	0	0	0	0	0	0	0
A:190(GLY)	0	0	0	0	0	0	0	0	0
A:191(GLU)	0	0.01	-0.01	0	0	0	0	0	0
A:192(LYS)	0	-0.01	0.01	0	0	0	0	0	0
A:193(ASN)	0.01	-0.01	0.02	0	0	0	0	0	0
A:194(VAL)	0.03	0	0.04	0	0	0	0	0	0
A:195(PHE)	0.21	-0.01	0.22	0	-0.01	0	0	0	0
A:196(GLU)	0.07	0.02	0.05	0	0	0	0	0	0
A:197(ALA)	0.01	0	0.02	0	0	0	0	0	0
A:198(LEU)	0.06	-0.01	0.07	0	0	0	0	0	0
A:199(SER)	0.07	-0.01	0.08	0	0	0	0	0	0
A:200(GLU)	0.08	0	0.08	0	0	0	0	0	0
A:201(LEU)	0.04	0	0.04	0	0	0	0	0	0
A:202(ILE)	0.09	0	0.1	0	-0.01	0	0	0	0
A:203(ILE)	0.22	0	0.24	0	-0.01	0	0	0	0
A:204(LEU)	0.05	0	0.05	0	0	0	0	0	0
A:205(THR)	0.02	0	0.02	0	0	0	0	0	0
A:206(ALA)	-0.01	0	-0.01	0	-0.01	0	0	0	0
A:207(SER)	0	0	0	0	0	0	0	0	0
A:208(HIS)	0	0	0	0	0	0	0	0	0
A:209(CYS)	-0.15	0	-0.15	0	0	0	0	0	0
A:210(LEU)	-0.01	0	0	0	-0.02	0	0	0	0
A:211(HIE)	-0.03	-0.01	-0.01	0	-0.02	0	0	0	0
A:212(GLY)	0.08	0	0.08	0	0	0	0	0	0
A:213(LYS)	0.01	0.02	-0.01	0	0	0	0	0	0
A:214(GLU)	0	-0.01	0.01	0	0	0	0	0	0
A:215(ILE)	0.04	0	0.04	0	0	0	0	0	0
A:216(ARG)	-0.04	0.02	-0.06	0	0	0	0	0	0
A:217(SER)	0	0	0	0	0	0	0	0	0
A:218(GLN)	-0.04	0	-0.04	0	0	0	0	0	0
A:219(LEU)	0.03	0	0.03	0	0	0	0	0	0
A:220(ASN)	0.05	0	0.05	0	0	0	0	0	0
A:221(GLU)	0.02	0	0.02	0	0	0	0	0	0
A:222(LYS)	0	-0.01	0	0	0	0	0	0	0
A:223(VAL)	0.03	0	0.03	0	0	0	0	0	0
A:224(ALA)	0.05	0	0.05	0	0	0	0	0	0
A:225(GLN)	0.03	0.01	0.03	0	0	0	0	0	0
A:226(LEU)	0.05	0.01	0.05	0	0	0	0	0	0
A:227(TYR)	0.36	0	0.38	0	-0.02	0	0	0	0
A:228(ALA)	0.11	0.01	0.1	0	-0.01	0	0	0	0
A:229(ASP)	0.04	0.07	-0.02	0	-0.01	0	0	0	0
A:230(LEU)	0.04	0.03	0.05	0	-0.04	0	0	0	0
A:231(ALA)	0.13	0.04	0.18	0	-0.09	0	0	0	0
A:232(GLY)	-0.03	0.02	-0.03	0	-0.02	0	0	0	0
A:233(GLY)	-0.32	0.04	-0.31	0	-0.04	0	0	0	0
A:234(PHE)	-4.12	-0.07	1.37	0	-2.43	0	-2.98	0	0
A:235(SER)	0.34	0.02	0.39	0	-0.06	0	0	0	0
A:236(HIE)	0.54	0.05	0.53	0	-0.04	0	0	0	0
A:237(ALA)	0.04	-0.01	0.05	0	-0.01	0	0	0	0
A:238(ALA)	-0.2	-0.04	-0.14	0	-0.02	0	0	0	0
A:239(TRP)	0.41	0.05	0.48	0	-0.13	0	0	0	0
A:240(LEU)	0.06	-0.02	0.08	0	-0.01	0	0	0	0
A:241(LEU)	0.05	-0.01	0.06	0	0	0	0	0	0
A:242(PRO)	0	-0.01	0.01	0	0	0	0	0	0
A:243(GLY)	0.02	0	0.02	0	0	0	0	0	0
A:244(TRP)	-0.01	-0.01	0	0	0	0	0	0	0
A:245(LEU)	0.02	0.01	0.02	0	0	0	0	0	0
A:246(PRO)	-0.02	0	-0.02	0	0	0	0	0	0
A:247(LEU)	0.05	-0.01	0.07	0	-0.01	0	0	0	0
A:248(PRO)	-0.01	-0.01	-0.01	0	0	0	0	0	0
A:249(SER)	0.06	-0.01	0.08	0	0	0	0	0	0
A:250(PHE)	0.21	-0.01	0.23	0	-0.02	0	0	0	0
A:251(ARG)	0.01	-0.07	0.08	0	0	0	0	0	0
A:252(ARG)	-0.06	-0.06	0	0	0	0	0	0	0
A:253(ARG)	-0.2	-0.05	-0.14	0	-0.01	0	0	0	0
A:254(ASP)	0.1	0.01	0.09	0	0	0	0	0	0
A:255(ARG)	-0.03	-0.03	0	0	0	0	0	0	0
A:256(ALA)	-0.08	0	-0.07	0	0	0	0	0	0
A:257(HIE)	0.03	0	0.04	0	-0.01	0	0	0	0
A:258(ARG)	0.01	-0.01	0.02	0	0	0	0	0	0
A:259(GLU)	0	0	0.01	0	0	0	0	0	0
A:260(ILE)	0.03	0	0.04	0	-0.01	0	0	0	0
A:261(LYS)	-0.01	0.01	-0.02	0	0	0	0	0	0
A:262(ASP)	0	-0.01	0.01	0	0	0	0	0	0
A:263(ILE)	-0.01	0	-0.01	0	0	0	0	0	0
A:264(PHE)	0.02	0	0.03	0	0	0	0	0	0
A:265(TYR)	0.01	0	0.01	0	0	0	0	0	0
A:266(LYS)	-0.01	0.01	-0.01	0	0	0	0	0	0
A:267(ALA)	-0.01	0	-0.01	0	0	0	0	0	0
A:268(ILE)	0	0	0	0	0	0	0	0	0
A:269(GLN)	0	0	0	0	0	0	0	0	0
A:270(LYS)	0	0.01	-0.02	0	0	0	0	0	0
A:271(ARG)	0	0.03	-0.03	0	0	0	0	0	0
A:272(ARG)	0	0.01	-0.01	0	0	0	0	0	0
A:273(GLN)	0	0	0	0	0	0	0	0	0
A:274(SER)	0	0	0	0	0	0	0	0	0
A:275(GLN)	0	0	0	0	0	0	0	0	0
A:276(GLU)	0	-0.01	0.01	0	0	0	0	0	0
A:277(LYS)	0	0.02	-0.02	0	0	0	0	0	0
A:278(ILE)	0	0	0	0	0	0	0	0	0
A:279(ASP)	0	-0.03	0.03	0	0	0	0	0	0
A:280(ASP)	0.01	-0.03	0.04	0	0	0	0	0	0
A:281(ILE)	0.09	0	0.1	0	-0.01	0	0	0	0
A:282(LEU)	0.1	0	0.1	0	0	0	0	0	0
A:283(GLN)	0.02	0	0.02	0	0	0	0	0	0
A:284(THR)	-0.08	0	-0.08	0	0	0	0	0	0
A:285(LEU)	0.01	0	0.03	0	-0.01	0	0	0	0
A:286(LEU)	0.01	0	0.01	0	0	0	0	0	0
A:287(ASP)	-0.01	-0.02	0.02	0	0	0	0	0	0
A:288(ALA)	-0.03	0	-0.03	0	0	0	0	0	0
A:289(THR)	-0.02	0	-0.02	0	0	0	0	0	0
A:290(TYR)	0.13	-0.01	0.15	0	-0.01	0	0	0	0
A:291(LYS)	0.01	0.03	-0.02	0	0	0	0	0	0
A:292(ASP)	0.01	-0.02	0.04	0	0	0	0	0	0
A:293(GLY)	0.01	0	0.01	0	0	0	0	0	0
A:294(ARG)	0.01	0.03	-0.03	0	0	0	0	0	0
A:295(PRO)	-0.02	0	-0.02	0	0	0	0	0	0
A:296(LEU)	0	0.01	0	0	-0.01	0	0	0	0
A:297(THR)	0.1	-0.01	0.11	0	0	0	0	0	0
A:298(ASP)	0.06	-0.02	0.08	0	0	0	0	0	0
A:299(ASP)	0.13	-0.02	0.16	0	-0.01	0	0	0	0
A:300(GLU)	0.32	-0.06	0.42	0	-0.04	0	0	0	0
A:301(VAL)	0.2	-0.01	0.23	0	-0.02	0	0	0	0
A:302(ALA)	0.16	0	0.18	0	-0.03	0	0	0	0
A:303(GLY)	0.19	0.01	0.51	0	-0.3	0	-0.03	0	0
A:304(MET)	-1.18	0.02	0.4	0	-1	0	-0.6	0	0
A:305(LEU)	0.16	0	0.26	0	-0.1	0	0	0	0
A:306(ILE)	0.01	-0.01	0.18	0	-0.15	0	0	0	0
A:307(GLY)	-1.71	-0.31	0.03	0	-1.09	0	-0.34	0	0
A:308(LEU)	-0.54	0.03	0.38	0	-0.66	0	-0.3	0	0
A:309(LEU)	0.03	-0.02	0.14	0	-0.08	0	0	0	0
A:310(LEU)	-0.83	-0.03	-0.1	0	-0.56	0	-0.14	0	0
A:311(ALA)	-2.1	0.02	-0.32	0	-1.08	0	-0.72	0	0
A:312(GLY)	0.31	-0.01	0.4	0	-0.07	0	0	0	0
A:313(GLN)	-0.21	0.01	-0.15	0	-0.07	0	0	0	0
A:314(ALA)	-1.3	0.07	-0.56	0	-0.53	0	-0.28	0	0
A:315(THR)	-0.69	0.03	-0.06	0	-0.46	0	-0.2	0	0
A:316(SER)	0.11	0.02	0.11	0	-0.02	0	0	0	0
A:317(SER)	-0.03	0.01	-0.02	0	-0.01	0	0	0	0
A:318(THR)	-0.13	0.02	-0.12	0	-0.02	0	0	0	0
A:319(THR)	-0.05	0.01	-0.05	0	-0.01	0	0	0	0
A:320(SER)	-0.12	0.01	-0.12	0	0	0	0	0	0
A:321(ALA)	-0.05	0	-0.05	0	0	0	0	0	0
A:322(TRP)	0.12	-0.01	0.13	0	-0.01	0	0	0	0
A:323(MET)	0.04	0	0.04	0	0	0	0	0	0
A:324(GLY)	0	0	0	0	0	0	0	0	0
A:325(PHE)	0.02	0	0.02	0	0	0	0	0	0
A:326(PHE)	0.05	0	0.05	0	0	0	0	0	0
A:327(LEU)	0	0	0	0	0	0	0	0	0
A:328(ALA)	-0.01	0	-0.01	0	0	0	0	0	0
A:329(ARG)	0	-0.01	0.01	0	0	0	0	0	0
A:330(ASP)	0	0	0	0	0	0	0	0	0
A:331(LYS)	0	0	0	0	0	0	0	0	0
A:332(THR)	0	0	0	0	0	0	0	0	0
A:333(LEU)	0	0	0	0	0	0	0	0	0
A:334(GLN)	0	0	0	0	0	0	0	0	0
A:335(LYS)	0	0	0	0	0	0	0	0	0
A:336(LYS)	0	0.01	-0.01	0	0	0	0	0	0
A:337(CYS)	0	0	0	0	0	0	0	0	0
A:338(TYR)	0	0	0	0	0	0	0	0	0
A:339(LEU)	0	0	0	0	0	0	0	0	0
A:340(GLU)	0	-0.02	0.02	0	0	0	0	0	0
A:341(GLN)	0	0	0	0	0	0	0	0	0
A:342(LYS)	0	0.01	-0.01	0	0	0	0	0	0
A:343(THR)	0	0	0	0	0	0	0	0	0
A:344(VAL)	0	0	0	0	0	0	0	0	0
A:345(CYS)	0	0	0	0	0	0	0	0	0
A:346(GLY)	0	0	0	0	0	0	0	0	0
A:347(GLU)	0	-0.01	0.01	0	0	0	0	0	0
A:348(ASN)	0	0	0	0	0	0	0	0	0
A:349(LEU)	0	0	0	0	0	0	0	0	0
A:350(PRO)	0	0	0	0	0	0	0	0	0
A:351(PRO)	0	0	0	0	0	0	0	0	0
A:352(LEU)	0	0	0	0	0	0	0	0	0
A:353(THR)	0.01	0	0.01	0	0	0	0	0	0
A:354(TYR)	0.02	0	0.02	0	0	0	0	0	0
A:355(ASP)	0	-0.02	0.02	0	0	0	0	0	0
A:356(GLN)	0	0	0	0	0	0	0	0	0
A:357(LEU)	0.01	0	0.01	0	0	0	0	0	0
A:358(LYS)	0	0.02	-0.02	0	0	0	0	0	0
A:359(ASP)	0	-0.02	0.02	0	0	0	0	0	0
A:360(LEU)	0.01	0	0.01	0	0	0	0	0	0
A:361(ASN)	0.01	0	0.01	0	0	0	0	0	0
A:362(LEU)	0.01	0	0.01	0	0	0	0	0	0
A:363(LEU)	0.04	0	0.04	0	0	0	0	0	0
A:364(ASP)	0.08	-0.04	0.12	0	0	0	0	0	0
A:365(ARG)	0.01	0.03	-0.02	0	0	0	0	0	0
A:366(CYS)	-0.01	0	-0.01	0	0	0	0	0	0
A:367(ILE)	0.15	0	0.15	0	0	0	0	0	0
A:368(LYS)	0.05	0.04	0.02	0	0	0	0	0	0
A:369(GLU)	0.06	-0.02	0.08	0	0	0	0	0	0
A:370(THR)	-0.02	0.01	-0.03	0	0	0	0	0	0
A:371(LEU)	0.16	0	0.17	0	-0.01	0	0	0	0
A:372(ARG)	-0.12	0.03	-0.15	0	0	0	0	0	0
A:373(LEU)	-0.04	0	-0.04	0	0	0	0	0	0
A:374(ARG)	-0.37	-0.04	-0.33	0	-0.01	0	0	0	0
A:375(PRO)	0.01	0.04	0	0	-0.03	0	0	0	0
A:376(PRO)	-0.05	0.1	0.05	0	-0.2	0	0	0	0
A:377(ILE)	-4.06	0.02	0.09	0	-2.1	0	-2.07	0	0
A:378(MET)	-0.37	-0.16	0.04	0	-0.24	0	-0.01	0	0
A:379(ILE)	-1.44	-3.03	2.58	0	-0.48	-0.28	-0.24	0	0
A:380(MET)	-1.14	0.05	-0.59	0	-0.44	0	-0.15	0	0
A:381(MET)	-0.53	-0.11	0.3	0	-0.52	0	-0.2	0	0
A:382(ARG)	-1.21	0.38	-1.5	0	-0.09	0	0	0	0
A:383(MET)	0.11	-0.01	0.13	0	-0.01	0	0	0	0
A:384(ALA)	0.03	0	0.03	0	0	0	0	0	0
A:385(ARG)	-0.01	0.05	-0.05	0	0	0	0	0	0
A:386(THR)	0.05	0	0.05	0	0	0	0	0	0
A:387(PRO)	-0.01	0	-0.01	0	0	0	0	0	0
A:388(GLN)	0.01	0	0.01	0	0	0	0	0	0
A:389(THR)	0	0	0	0	0	0	0	0	0
A:390(VAL)	0.02	0	0.01	0	0	0	0	0	0
A:391(ALA)	0	0	0	0	0	0	0	0	0
A:392(GLY)	0	0	0	0	0	0	0	0	0
A:393(TYR)	0	0	0	0	0	0	0	0	0
A:394(THR)	-0.01	0	-0.01	0	0	0	0	0	0
A:395(ILE)	0.02	0	0.02	0	0	0	0	0	0
A:396(PRO)	0.02	0	0.02	0	0	0	0	0	0
A:397(PRO)	-0.02	0	-0.03	0	0	0	0	0	0
A:398(GLY)	-0.03	0.01	-0.03	0	0	0	0	0	0
A:399(HIE)	0.05	-0.01	0.06	0	0	0	0	0	0
A:400(GLN)	0.05	0.02	0.04	0	-0.01	0	0	0	0
A:401(VAL)	0.19	-0.02	0.22	0	-0.01	0	0	0	0
A:402(CYS)	-0.15	0.06	-0.18	0	-0.02	0	0	0	0
A:403(VAL)	0.27	-0.06	0.35	0	-0.02	0	0	0	0
A:404(SER)	0.08	0.01	0.08	0	-0.01	0	0	0	0
A:405(PRO)	-0.06	0.03	-0.07	0	-0.03	0	0	0	0
A:406(THR)	0.25	-0.01	0.27	0	-0.01	0	0	0	0
A:407(VAL)	0.03	0.01	0.03	0	0	0	0	0	0
A:408(ASN)	0.03	0.03	0	0	0	0	0	0	0
A:409(GLN)	0.15	-0.02	0.17	0	0	0	0	0	0
A:410(ARG)	-0.02	-0.01	0	0	0	0	0	0	0
A:411(LEU)	0.03	0	0.03	0	0	0	0	0	0
A:412(LYS)	0.01	0	0.01	0	0	0	0	0	0
A:413(ASP)	0	-0.01	0.01	0	0	0	0	0	0
A:414(SER)	0	0	0	0	0	0	0	0	0
A:415(TRP)	0.07	0	0.07	0	0	0	0	0	0
A:416(VAL)	0	0	0	0	0	0	0	0	0
A:417(GLU)	0	-0.01	0.01	0	0	0	0	0	0
A:418(ARG)	0	0	0	0	0	0	0	0	0
A:419(LEU)	0	0	0	0	0	0	0	0	0
A:420(ASP)	0.01	0	0.01	0	0	0	0	0	0
A:421(PHE)	0.02	0	0.02	0	0	0	0	0	0
A:422(ASN)	0	0	0	0	0	0	0	0	0
A:423(PRO)	0	0	0.01	0	0	0	0	0	0
A:424(ASP)	0	-0.01	0.02	0	0	0	0	0	0
A:425(ARG)	-0.02	0.03	-0.04	0	0	0	0	0	0
A:426(TYR)	0.04	0	0.04	0	0	0	0	0	0
A:427(LEU)	0	0	0	0	0	0	0	0	0
A:428(GLN)	0	0	0	0	0	0	0	0	0
A:429(ASP)	0	-0.02	0.02	0	0	0	0	0	0
A:430(ASN)	0	0	0	0	0	0	0	0	0
A:431(PRO)	0	0	0	0	0	0	0	0	0
A:432(ALA)	0	0	0	0	0	0	0	0	0
A:433(SER)	0	0	0	0	0	0	0	0	0
A:434(GLY)	0	0	0	0	0	0	0	0	0
A:435(GLU)	0.01	-0.04	0.05	0	0	0	0	0	0
A:436(LYS)	-0.01	0.04	-0.05	0	0	0	0	0	0
A:437(PHE)	-0.01	-0.01	0	0	0	0	0	0	0
A:438(ALA)	0.05	-0.01	0.06	0	0	0	0	0	0
A:439(TYR)	-0.09	0	-0.08	0	0	0	0	0	0
A:440(VAL)	0.26	-0.02	0.29	0	-0.01	0	0	0	0
A:441(PRO)	0.24	-0.02	0.28	0	-0.02	0	0	0	0
A:442(PHE)	0.38	0	0.42	0	-0.04	0	0	0	0
A:443(GLY)	-0.22	0.03	-0.23	0	-0.02	0	0	0	0
A:444(ALA)	0.33	-0.02	0.36	0	-0.01	0	0	0	0
A:445(GLY)	0.08	-0.01	0.09	0	0	0	0	0	0
A:446(ARG)	-0.07	0.1	-0.16	0	-0.01	0	0	0	0
A:447(HIP)	-1.12	0.22	-1.21	0	-0.12	0	-0.01	0	0
A:448(ARG)	-0.19	0.13	-0.28	0	-0.04	0	0	0	0
A:449(CYS)	1.17	-0.07	1.34	0	-0.1	0	0	0	0
A:450(ILE)	-0.36	0.02	-0.27	0	-0.11	0	0	0	0
A:451(GLY)	-0.36	0.02	-0.35	0	-0.03	0	0	0	0
A:452(GLU)	0.18	-0.08	0.28	0	-0.02	0	0	0	0
A:453(ASN)	0.09	0.01	0.08	0	-0.01	0	0	0	0
A:454(PHE)	0.11	0.01	0.11	0	-0.01	0	0	0	0
A:455(ALA)	-0.07	0.01	-0.07	0	-0.01	0	0	0	0
A:456(TYR)	0.17	0.01	0.17	0	0	0	0	0	0
A:457(VAL)	-0.04	0.01	-0.04	0	0	0	0	0	0
A:458(GLN)	0.09	0	0.1	0	-0.01	0	0	0	0
A:459(ILE)	0.09	0.01	0.09	0	0	0	0	0	0
A:460(LYS)	0.02	0.03	-0.02	0	0	0	0	0	0
A:461(THR)	-0.07	0	-0.08	0	0	0	0	0	0
A:462(ILE)	0.02	0	0.02	0	0	0	0	0	0
A:463(TRP)	0.08	0	0.08	0	0	0	0	0	0
A:464(SER)	-0.01	0	-0.01	0	0	0	0	0	0
A:465(THR)	-0.03	0	-0.03	0	0	0	0	0	0
A:466(MET)	0.01	0	0.01	0	0	0	0	0	0
A:467(LEU)	0.01	0	0.01	0	0	0	0	0	0
A:468(ARG)	0	0.02	-0.02	0	0	0	0	0	0
A:469(LEU)	0	0	0	0	0	0	0	0	0
A:470(TYR)	0	0	0	0	0	0	0	0	0
A:471(GLU)	0	0	0	0	0	0	0	0	0
A:472(PHE)	0.01	0	0.01	0	0	0	0	0	0
A:473(ASP)	0	0.01	0	0	0	0	0	0	0
A:474(LEU)	0	0	0.01	0	0	0	0	0	0
A:475(ILE)	0	0	0	0	0	0	0	0	0
A:476(ASP)	0	0.02	-0.01	0	0	0	0	0	0
A:477(GLY)	0	0	0	0	0	0	0	0	0
A:478(TYR)	0	0	0	0	0	0	0	0	0
A:479(PHE)	0	0	0	0	0	0	0	0	0
A:480(PRO)	0	0	0	0	0	0	0	0	0
A:481(THR)	0.03	-0.01	0.04	0	0	0	0	0	0
A:482(VAL)	-0.12	-0.01	-0.1	0	0	0	0	0	0
A:483(ASN)	0.14	0.06	0.09	0	-0.01	0	0	0	0
A:484(TYR)	0.17	0.04	0.14	0	-0.01	0	0	0	0
A:485(THR)	0.06	0.03	0.04	0	-0.01	0	0	0	0
A:486(THR)	-0.63	-0.06	-0.5	0	-0.07	0	0	0	0
A:487(MET)	-3.52	-0.34	-0.5	0	-1.73	0	-0.95	0	0
A:488(ILE)	-0.85	0.16	0.65	0	-1.02	0	-0.64	0	0
A:489(HIS)	0.05	-0.03	0.15	0	-0.06	0	0	0	0
A:490(THR)	0.05	0	0.07	0	-0.02	0	0	0	0
A:491(PRO)	0.01	0	0.01	0	0	0	0	0	0
A:492(GLU)	0.07	0.07	0	0	0	0	0	0	0
A:493(ASN)	0.01	0	0.01	0	0	0	0	0	0
A:494(PRO)	0.02	0	0.03	0	0	0	0	0	0
A:495(VAL)	0	0	0	0	0	0	0	0	0
A:496(ILE)	0.01	0	0.01	0	0	0	0	0	0
A:497(ARG)	0	-0.01	0.02	0	0	0	0	0	0
A:498(TYR)	0	0	0	0	0	0	0	0	0
A:499(LYS)	0	0	0	0	0	0	0	0	0
A:500(ARG)	0	0	0	0	0	0	0	0	0
A:501(ARG)	0	0.01	-0.01	0	0	0	0	0	0
A:502(SER)	0	0	0	0	0	0	0	0	0
A:601(HEM)	20.82	-1.05	31.96	0	-5.41	0	-4.68	0	0
A:602(LAN)	-44.25	-4.41	15.46	0	-35.21	-0.28	-24.14	0	0
B:601(HEM)	0	-0.01	0.01	0	0	0	0	0	0
B:602(LAN)	0.03	0	0.03	0	0	0	0	0	0

## Sheet: 6UEZ_Pregnenolone
													Res	dGbind	Coulomb	Solvation	Covalent	vdW	H-bond	Lipo	Pi-Pi	Contact
													_:1(CL)	0	0	0	0	0	0	0	0	0
													_:2(CL)	0	0	0	0	0	0	0	0	0
													_:3(CL)	0	0	0	0	0	0	0	0	0
													_:4(CL)	0	0	0	0	0	0	0	0	0
													_:5(CL)	0	0	0	0	0	0	0	0	0
													_:6(NA)	0	0	0	0	0	0	0	0	0
													_:7(NA)	0	0	0	0	0	0	0	0	0
													_:8(NA)	0	0	0	0	0	0	0	0	0
													_:9(NA)	0	0	0	0	0	0	0	0	0
													_:10(NA)	0	0	0	0	0	0	0	0	0
													_:11(NA)	0	0	0	0	0	0	0	0	0
													_:12(NA)	0	0	0	0	0	0	0	0	0
													_:13(NA)	0	0	0	0	0	0	0	0	0
													_:14(NA)	0	0	0	0	0	0	0	0	0
													_:15(NA)	0	0	0	0	0	0	0	0	0
													_:16(NA)	0	0	0	0	0	0	0	0	0
													_:17(NA)	0	0	0	0	0	0	0	0	0
													_:18(NA)	0	0	0	0	0	0	0	0	0
													_:19(NA)	0	0	0	0	0	0	0	0	0
													_:20(NA)	0	0	0	0	0	0	0	0	0
													_:21(NA)	0	0	0	0	0	0	0	0	0
													_:22(NA)	0	0	0	0	0	0	0	0	0
													_:23(NA)	0	0	0	0	0	0	0	0	0
													_:24(NA)	0	0	0	0	0	0	0	0	0
													_:25(NA)	0	0	0	0	0	0	0	0	0
													_:26(NA)	0	0	0	0	0	0	0	0	0
													_:27(NA)	0	0	0	0	0	0	0	0	0
													_:28(NA)	0	0	0	0	0	0	0	0	0
													_:29(NA)	0	0	0	0	0	0	0	0	0
													_:30(NA)	0	0	0	0	0	0	0	0	0
													_:31(NA)	0	0	0	0	0	0	0	0	0
													_:32(NA)	0	0	0	0	0	0	0	0	0
													_:33(NA)	0	0	0	0	0	0	0	0	0
													_:34(NA)	0	0	0	0	0	0	0	0	0
													_:35(NA)	0	0	0	0	0	0	0	0	0
													_:36(NA)	0	0	0	0	0	0	0	0	0
													_:37(NA)	0	0	0	0	0	0	0	0	0
													_:38(NA)	0	0	0	0	0	0	0	0	0
													_:39(NA)	0	0	0	0	0	0	0	0	0
													_:40(NA)	0	0	0	0	0	0	0	0	0
													_:41(NA)	0	0	0	0	0	0	0	0	0
													_:42(NA)	0	0	0	0	0	0	0	0	0
													_:43(NA)	0	0	0	0	0	0	0	0	0
													_:44(NA)	-0.07	0.01	-0.08	0	0	0	0	0	0
													_:45(NA)	0	0	0	0	0	0	0	0	0
													_:46(NA)	0	0	0	0	0	0	0	0	0
													_:47(NA)	0	0	0	0	0	0	0	0	0
													_:48(NA)	0	0	0	0	0	0	0	0	0
													_:49(NA)	0	0	0	0	0	0	0	0	0
													_:50(NA)	0	0	0	0	0	0	0	0	0
													_:51(NA)	0	0	0	0	0	0	0	0	0
													_:52(NA)	0	0	0	0	0	0	0	0	0
													_:53(NA)	0	0	0	0	0	0	0	0	0
													_:54(NA)	0	0	0	0	0	0	0	0	0
													_:55(NA)	0	0	0	0	0	0	0	0	0
													_:56(NA)	0	0	0	0	0	0	0	0	0
													_:57(NA)	0	0	0	0	0	0	0	0	0
													_:58(NA)	0	0	0	0	0	0	0	0	0
													_:59(NA)	0	0	0	0	0	0	0	0	0
													_:60(NA)	0	0	0	0	0	0	0	0	0
													_:61(NA)	0	0	0	0	0	0	0	0	0
													_:62(NA)	0	0	0	0	0	0	0	0	0
													_:63(NA)	0	0	0	0	0	0	0	0	0
													_:64(NA)	0	0	0	0	0	0	0	0	0
													_:65(NA)	0	0	0	0	0	0	0	0	0
													_:66(NA)	0	0	0	0	0	0	0	0	0
													_:67(NA)	0	0	0	0	0	0	0	0	0
													_:68(NA)	0	0	0	0	0	0	0	0	0
													_:69(NA)	0	0	0	0	0	0	0	0	0
													_:70(NA)	0	0	0	0	0	0	0	0	0
													_:71(NA)	0	0	0	0	0	0	0	0	0
													_:72(NA)	0	0	0	0	0	0	0	0	0
													_:73(NA)	0	0	0	0	0	0	0	0	0
													_:74(NA)	0	0	0	0	0	0	0	0	0
													_:75(NA)	0	0	0	0	0	0	0	0	0
													_:76(NA)	0	0	0	0	0	0	0	0	0
													_:77(CL)	0	0	0	0	0	0	0	0	0
													_:78(NA)	0	0	0	0	0	0	0	0	0
													_:79(CL)	0	0	0	0	0	0	0	0	0
													_:80(NA)	0	0	0	0	0	0	0	0	0
													_:81(CL)	0	0	0	0	0	0	0	0	0
													_:82(NA)	0	0	0	0	0	0	0	0	0
													_:83(CL)	0	0	0	0	0	0	0	0	0
													_:84(NA)	0	0	0	0	0	0	0	0	0
													_:85(CL)	0	0	0	0	0	0	0	0	0
													_:86(CL)	0	0	0	0	0	0	0	0	0
													_:87(CL)	0	0	0	0	0	0	0	0	0
													_:88(CL)	0	0	0	0	0	0	0	0	0
													_:89(CL)	0	0	0	0	0	0	0	0	0
													_:90(CL)	0	0	0	0	0	0	0	0	0
													_:91(CL)	0.01	0	0.01	0	0	0	0	0	0
													_:92(CL)	0	0	0	0	0	0	0	0	0
													_:93(CL)	0	0	0	0	0	0	0	0	0
													_:94(CL)	0	0	0	0	0	0	0	0	0
													_:95(CL)	0	0	0	0	0	0	0	0	0
													_:96(CL)	0	0	0	0	0	0	0	0	0
													_:97(CL)	0.01	0	0.01	0	0	0	0	0	0
													_:98(CL)	0	0	0	0	0	0	0	0	0
													_:99(CL)	0	0	0	0	0	0	0	0	0
													_:100(CL)	0	0	0	0	0	0	0	0	0
													_:101(CL)	0	0	0	0	0	0	0	0	0
													_:102(CL)	0	0	0	0	0	0	0	0	0
													_:103(CL)	0	0	0	0	0	0	0	0	0
													_:104(CL)	0	0	0	0	0	0	0	0	0
													_:105(CL)	0	0	0	0	0	0	0	0	0
													_:106(CL)	0.01	0	0	0	0	0	0	0	0
													_:107(CL)	0	0	0	0	0	0	0	0	0
													_:108(CL)	0	0	0	0	0	0	0	0	0
													_:109(CL)	0	0	0	0	0	0	0	0	0
													_:110(CL)	0	0	0	0	0	0	0	0	0
													_:111(CL)	0	0	0	0	0	0	0	0	0
													_:112(CL)	0	0	0	0	0	0	0	0	0
													_:113(CL)	0	0	0	0	0	0	0	0	0
													_:114(CL)	0	0	0	0	0	0	0	0	0
													_:115(CL)	0	0	0	0	0	0	0	0	0
													_:116(CL)	0	0	0	0	0	0	0	0	0
													_:117(CL)	0	0	0	0	0	0	0	0	0
													_:118(CL)	0	0	0	0	0	0	0	0	0
													_:119(CL)	0	0	0	0	0	0	0	0	0
													_:120(CL)	0	0	0	0	0	0	0	0	0
													_:121(CL)	0	0	0	0	0	0	0	0	0
													_:122(CL)	0	0	0	0	0	0	0	0	0
													_:123(CL)	0	0	0	0	0	0	0	0	0
													_:124(CL)	0	0	0	0	0	0	0	0	0
													_:125(CL)	0	0	0	0	0	0	0	0	0
													_:126(CL)	0	0	0	0	0	0	0	0	0
													_:127(CL)	0	0	0	0	0	0	0	0	0
													_:128(CL)	0	0	0	0	0	0	0	0	0
													_:129(CL)	0	0	0	0	0	0	0	0	0
													_:130(CL)	0	0	0	0	0	0	0	0	0
													_:131(CL)	0	0	0	0	0	0	0	0	0
													_:132(CL)	0	0	0	0	0	0	0	0	0
													_:133(CL)	0	0	0	0	0	0	0	0	0
													_:134(CL)	0	0	0	0	0	0	0	0	0
													_:135(CL)	0	0	0	0	0	0	0	0	0
													_:136(CL)	0	0	0	0	0	0	0	0	0
													_:137(CL)	0	0	0	0	0	0	0	0	0
													_:138(CL)	0	0	0	0	0	0	0	0	0
													_:139(CL)	0	0	0	0	0	0	0	0	0
													_:140(CL)	0	0	0	0	0	0	0	0	0
													_:141(CL)	0	0	0	0	0	0	0	0	0
													_:142(CL)	0	0	0	0	0	0	0	0	0
													_:143(CL)	0	0	0	0	0	0	0	0	0
													_:144(CL)	0	0	0	0	0	0	0	0	0
													_:145(CL)	0	0	0	0	0	0	0	0	0
													_:146(CL)	0	0	0	0	0	0	0	0	0
													_:147(CL)	0	0	0	0	0	0	0	0	0
													_:148(CL)	0	0	0	0	0	0	0	0	0
													_:149(CL)	0	0	0	0	0	0	0	0	0
													_:150(CL)	0	0	0	0	0	0	0	0	0
													_:151(CL)	0	0	0	0	0	0	0	0	0
													_:152(CL)	0	0	0	0	0	0	0	0	0
													_:153(CL)	0	0	0.01	0	0	0	0	0	0
													_:154(CL)	0	0	0	0	0	0	0	0	0
													_:155(CL)	0	0	0	0	0	0	0	0	0
													A:57(LYS)	0	0.01	-0.01	0	0	0	0	0	0
													A:58(GLY)	0	0	0	0	0	0	0	0	0
													A:59(LYS)	0	0.01	-0.01	0	0	0	0	0	0
													A:60(LEU)	0	0	0	0	0	0	0	0	0
													A:61(PRO)	0	0	0	0	0	0	0	0	0
													A:62(PRO)	0	0	0	0	0	0	0	0	0
													A:63(TYR)	0	0	0	0	0	0	0	0	0
													A:64(ILE)	0	0	0	0	0	0	0	0	0
													A:65(PHE)	0	0	0	0	0	0	0	0	0
													A:66(SER)	0	0	0	0	0	0	0	0	0
													A:67(PRO)	0	0	0	0	0	0	0	0	0
													A:68(ILE)	0	0	0	0	0	0	0	0	0
													A:69(PRO)	0	0	0	0	0	0	0	0	0
													A:70(PHE)	0	0	0	0	0	0	0	0	0
													A:71(LEU)	0	0	0	0	0	0	0	0	0
													A:72(GLY)	0	0	0	0	0	0	0	0	0
													A:73(HIE)	0	0	0	0	0	0	0	0	0
													A:74(ALA)	0	0	0	0	0	0	0	0	0
													A:75(ILE)	0	0	0	0	0	0	0	0	0
													A:76(ALA)	0	0	0	0	0	0	0	0	0
													A:77(PHE)	0	0	0	0	0	0	0	0	0
													A:78(GLY)	0	0	0	0	0	0	0	0	0
													A:79(LYS)	0	0.01	-0.01	0	0	0	0	0	0
													A:80(SER)	0	0	0	0	0	0	0	0	0
													A:81(PRO)	0	0	0	0	0	0	0	0	0
													A:82(ILE)	0	0	0	0	0	0	0	0	0
													A:83(GLU)	0	-0.01	0.01	0	0	0	0	0	0
													A:84(PHE)	0	0	0	0	0	0	0	0	0
													A:85(LEU)	0	0	0	0	0	0	0	0	0
													A:86(GLU)	0	-0.01	0.01	0	0	0	0	0	0
													A:87(ASN)	0	0	0	0	0	0	0	0	0
													A:88(ALA)	0	0	0	0	0	0	0	0	0
													A:89(TYR)	0	0	0	0	0	0	0	0	0
													A:90(GLU)	0	-0.01	0.01	0	0	0	0	0	0
													A:91(LYS)	0	0.01	-0.01	0	0	0	0	0	0
													A:92(TYR)	0	0	0	0	0	0	0	0	0
													A:93(GLY)	0	0	0	0	0	0	0	0	0
													A:94(PRO)	0	0	0	0	0	0	0	0	0
													A:95(VAL)	0	0	0	0	0	0	0	0	0
													A:96(PHE)	0	0	0	0	0	0	0	0	0
													A:97(SER)	0	0	0	0	0	0	0	0	0
													A:98(PHE)	0	0	0	0	0	0	0	0	0
													A:99(THR)	0	0	0	0	0	0	0	0	0
													A:100(MET)	0	0	0	0	0	0	0	0	0
													A:101(VAL)	0	0	0	0	0	0	0	0	0
													A:102(GLY)	0	0	0	0	0	0	0	0	0
													A:103(LYS)	0	0.01	-0.01	0	0	0	0	0	0
													A:104(THR)	0	0	0	0	0	0	0	0	0
													A:105(PHE)	0	0	0	0	0	0	0	0	0
													A:106(THR)	0	0	0	0	0	0	0	0	0
													A:107(TYR)	0	0	0	0	0	0	0	0	0
													A:108(LEU)	0	0	0	0	0	0	0	0	0
													A:109(LEU)	0	0	0	0	0	0	0	0	0
													A:110(GLY)	0	0	0	0	0	0	0	0	0
													A:111(SER)	0	0	0	0	0	0	0	0	0
													A:112(ASP)	0	-0.02	0.02	0	0	0	0	0	0
													A:113(ALA)	0	0	0	0	0	0	0	0	0
													A:114(ALA)	0	0	0	0	0	0	0	0	0
													A:115(ALA)	0	0	0	0	0	0	0	0	0
													A:116(LEU)	0	0	0	0	0	0	0	0	0
													A:117(LEU)	0	0	0	0	0	0	0	0	0
													A:118(PHE)	0	0	0	0	0	0	0	0	0
													A:119(ASN)	0	0	0	0	0	0	0	0	0
													A:120(SER)	0	0	0	0	0	0	0	0	0
													A:121(LYS)	0	0.01	-0.01	0	0	0	0	0	0
													A:122(ASN)	0	0	0	0	0	0	0	0	0
													A:123(GLU)	0	-0.01	0.01	0	0	0	0	0	0
													A:124(ASP)	0	-0.01	0.01	0	0	0	0	0	0
													A:125(LEU)	0	0	0	0	0	0	0	0	0
													A:126(ASN)	0	0	0	0	0	0	0	0	0
													A:127(ALA)	0	0	0	0	0	0	0	0	0
													A:128(GLU)	0	-0.01	0.01	0	0	0	0	0	0
													A:129(ASP)	0	-0.01	0.01	0	0	0	0	0	0
													A:130(VAL)	0	0	0	0	0	0	0	0	0
													A:131(TYR)	0	0	0	0	0	0	0	0	0
													A:132(SER)	0	0	0	0	0	0	0	0	0
													A:133(ARG)	0	0.01	-0.01	0	0	0	0	0	0
													A:134(LEU)	0	0	0	0	0	0	0	0	0
													A:135(THR)	0	0	0	0	0	0	0	0	0
													A:136(THR)	0	0	0	0	0	0	0	0	0
													A:137(PRO)	0	0	0	0	0	0	0	0	0
													A:138(VAL)	0	0	0	0	0	0	0	0	0
													A:139(PHE)	0	0	0	0	0	0	0	0	0
													A:140(GLY)	0	0	0	0	0	0	0	0	0
													A:141(LYS)	0	0	0	0	0	0	0	0	0
													A:142(GLY)	0	0	0	0	0	0	0	0	0
													A:143(VAL)	0	0	0	0	0	0	0	0	0
													A:144(ALA)	0	0	0	0	0	0	0	0	0
													A:145(TYR)	0	0	0	0	0	0	0	0	0
													A:146(ASP)	0	-0.01	0.01	0	0	0	0	0	0
													A:147(VAL)	0	0	0	0	0	0	0	0	0
													A:148(PRO)	0	0	0	0	0	0	0	0	0
													A:149(ASN)	0	0	0	0	0	0	0	0	0
													A:150(PRO)	0	0	0	0	0	0	0	0	0
													A:151(VAL)	0	0	0	0	0	0	0	0	0
													A:152(PHE)	0	0	0	0	0	0	0	0	0
													A:153(LEU)	0	0	0	0	0	0	0	0	0
													A:154(GLU)	0	-0.01	0.01	0	0	0	0	0	0
													A:155(GLN)	0	0	0	0	0	0	0	0	0
													A:156(LYS)	0	0.01	-0.01	0	0	0	0	0	0
													A:157(LYS)	0	0.01	-0.01	0	0	0	0	0	0
													A:158(MET)	0	0	0	0	0	0	0	0	0
													A:159(LEU)	0	0	0	0	0	0	0	0	0
													A:160(LYS)	0	0.01	-0.01	0	0	0	0	0	0
													A:161(SER)	0	0	0	0	0	0	0	0	0
													A:162(GLY)	0	0	0	0	0	0	0	0	0
													A:163(LEU)	0	0	0	0	0	0	0	0	0
													A:164(ASN)	0	0	0	0	0	0	0	0	0
													A:165(ILE)	0	0	0	0	0	0	0	0	0
													A:166(ALA)	0	0	0	0	0	0	0	0	0
													A:167(HIS)	0	0	0	0	0	0	0	0	0
													A:168(PHE)	0	0	0	0	0	0	0	0	0
													A:169(LYS)	0	0.01	-0.01	0	0	0	0	0	0
													A:170(GLN)	0	0	0	0	0	0	0	0	0
													A:171(HIE)	0	0	0	0	0	0	0	0	0
													A:172(VAL)	0	0	0	0	0	0	0	0	0
													A:173(SER)	0	0	0	0	0	0	0	0	0
													A:174(ILE)	0	0	0	0	0	0	0	0	0
													A:175(ILE)	0	0	0	0	0	0	0	0	0
													A:176(GLU)	0	0	0	0	0	0	0	0	0
													A:177(LYS)	0	0	0	0	0	0	0	0	0
													A:178(GLU)	0	0	0	0	0	0	0	0	0
													A:179(THR)	0	0	0	0	0	0	0	0	0
													A:180(LYS)	0	0	0	0	0	0	0	0	0
													A:181(GLU)	0	0	0	0	0	0	0	0	0
													A:182(TYR)	0	0	0	0	0	0	0	0	0
													A:183(PHE)	0	0	0	0	0	0	0	0	0
													A:184(GLU)	0	0	0	0	0	0	0	0	0
													A:185(SER)	0	0	0	0	0	0	0	0	0
													A:186(TRP)	0	0	0	0	0	0	0	0	0
													A:187(GLY)	0	0	0	0	0	0	0	0	0
													A:188(GLU)	0	0	0	0	0	0	0	0	0
													A:189(SER)	0	0	0	0	0	0	0	0	0
													A:190(GLY)	0	0	0	0	0	0	0	0	0
													A:191(GLU)	0	0	0	0	0	0	0	0	0
													A:192(LYS)	0	0	0	0	0	0	0	0	0
													A:193(ASN)	0	0	0	0	0	0	0	0	0
													A:194(VAL)	0	0	0	0	0	0	0	0	0
													A:195(PHE)	0	0	0	0	0	0	0	0	0
													A:196(GLU)	0	0	0	0	0	0	0	0	0
													A:197(ALA)	0	0	0	0	0	0	0	0	0
													A:198(LEU)	0	0	0	0	0	0	0	0	0
													A:199(SER)	0	0	0	0	0	0	0	0	0
													A:200(GLU)	0	0	0	0	0	0	0	0	0
													A:201(LEU)	0	0	0	0	0	0	0	0	0
													A:202(ILE)	0	0	0	0	0	0	0	0	0
													A:203(ILE)	0	0	0	0	0	0	0	0	0
													A:204(LEU)	0	0	0	0	0	0	0	0	0
													A:205(THR)	0	0	0	0	0	0	0	0	0
													A:206(ALA)	0	0	0	0	0	0	0	0	0
													A:207(SER)	0	0	0	0	0	0	0	0	0
													A:208(HIS)	0	0	0	0	0	0	0	0	0
													A:209(CYS)	0	0	0	0	0	0	0	0	0
													A:210(LEU)	0	0	0	0	0	0	0	0	0
													A:211(HIE)	0	0	0	0	0	0	0	0	0
													A:212(GLY)	0	0	0	0	0	0	0	0	0
													A:213(LYS)	0	0	0	0	0	0	0	0	0
													A:214(GLU)	0	0	0	0	0	0	0	0	0
													A:215(ILE)	0	0	0	0	0	0	0	0	0
													A:216(ARG)	0	0.01	0	0	0	0	0	0	0
													A:217(SER)	0	0	0	0	0	0	0	0	0
													A:218(GLN)	0	0	0	0	0	0	0	0	0
													A:219(LEU)	0	0	0	0	0	0	0	0	0
													A:220(ASN)	0	0	0	0	0	0	0	0	0
													A:221(GLU)	0	0	0	0	0	0	0	0	0
													A:222(LYS)	0	0	0	0	0	0	0	0	0
													A:223(VAL)	0	0	0	0	0	0	0	0	0
													A:224(ALA)	0	0	0	0	0	0	0	0	0
													A:225(GLN)	0	0	0	0	0	0	0	0	0
													A:226(LEU)	0	0	0	0	0	0	0	0	0
													A:227(TYR)	0	0	0	0	0	0	0	0	0
													A:228(ALA)	0	0	0	0	0	0	0	0	0
													A:229(ASP)	0	-0.01	0	0	0	0	0	0	0
													A:230(LEU)	0	0	0	0	0	0	0	0	0
													A:231(ALA)	0	0	0	0	0	0	0	0	0
													A:232(GLY)	0	0	0	0	0	0	0	0	0
													A:233(GLY)	0	0	0	0	0	0	0	0	0
													A:234(PHE)	0	0	0	0	0	0	0	0	0
													A:235(SER)	0	0	0	0	0	0	0	0	0
													A:236(HIE)	0	0	0	0	0	0	0	0	0
													A:237(ALA)	0	0	0	0	0	0	0	0	0
													A:238(ALA)	0	0	0	0	0	0	0	0	0
													A:239(TRP)	0	0	0	0	0	0	0	0	0
													A:240(LEU)	0	0	0	0	0	0	0	0	0
													A:241(LEU)	0	0	0	0	0	0	0	0	0
													A:242(PRO)	0	0	0	0	0	0	0	0	0
													A:243(GLY)	0	0	0	0	0	0	0	0	0
													A:244(TRP)	0	0	0	0	0	0	0	0	0
													A:245(LEU)	0	0	0	0	0	0	0	0	0
													A:246(PRO)	0	0	0	0	0	0	0	0	0
													A:247(LEU)	0	0	0	0	0	0	0	0	0
													A:248(PRO)	0	0	0	0	0	0	0	0	0
													A:249(SER)	0	0	0	0	0	0	0	0	0
													A:250(PHE)	0	0	0	0	0	0	0	0	0
													A:251(ARG)	0	0.01	-0.01	0	0	0	0	0	0
													A:252(ARG)	0	0.01	-0.01	0	0	0	0	0	0
													A:253(ARG)	0	0.01	-0.01	0	0	0	0	0	0
													A:254(ASP)	0	0	0	0	0	0	0	0	0
													A:255(ARG)	0	0	-0.01	0	0	0	0	0	0
													A:256(ALA)	0	0	0	0	0	0	0	0	0
													A:257(HIE)	0	0	0	0	0	0	0	0	0
													A:258(ARG)	0	0	0	0	0	0	0	0	0
													A:259(GLU)	0	0	0	0	0	0	0	0	0
													A:260(ILE)	0	0	0	0	0	0	0	0	0
													A:261(LYS)	0	0	0	0	0	0	0	0	0
													A:262(ASP)	0	0	0	0	0	0	0	0	0
													A:263(ILE)	0	0	0	0	0	0	0	0	0
													A:264(PHE)	0	0	0	0	0	0	0	0	0
													A:265(TYR)	0	0	0	0	0	0	0	0	0
													A:266(LYS)	0	0	0	0	0	0	0	0	0
													A:267(ALA)	0	0	0	0	0	0	0	0	0
													A:268(ILE)	0	0	0	0	0	0	0	0	0
													A:269(GLN)	0	0	0	0	0	0	0	0	0
													A:270(LYS)	0	0	0	0	0	0	0	0	0
													A:271(ARG)	0	0	0	0	0	0	0	0	0
													A:272(ARG)	0	0	0	0	0	0	0	0	0
													A:273(GLN)	0	0	0	0	0	0	0	0	0
													A:274(SER)	0	0	0	0	0	0	0	0	0
													A:275(GLN)	0	0	0	0	0	0	0	0	0
													A:276(GLU)	0	0	0	0	0	0	0	0	0
													A:277(LYS)	0	0	0	0	0	0	0	0	0
													A:278(ILE)	0	0	0	0	0	0	0	0	0
													A:279(ASP)	0	0	0	0	0	0	0	0	0
													A:280(ASP)	0	0	0	0	0	0	0	0	0
													A:281(ILE)	0	0	0	0	0	0	0	0	0
													A:282(LEU)	0	0	0	0	0	0	0	0	0
													A:283(GLN)	0	0	0	0	0	0	0	0	0
													A:284(THR)	0	0	0	0	0	0	0	0	0
													A:285(LEU)	0	0	0	0	0	0	0	0	0
													A:286(LEU)	0	0	0	0	0	0	0	0	0
													A:287(ASP)	0	0	0	0	0	0	0	0	0
													A:288(ALA)	0	0	0	0	0	0	0	0	0
													A:289(THR)	0	0	0	0	0	0	0	0	0
													A:290(TYR)	0	0	0	0	0	0	0	0	0
													A:291(LYS)	0	0.01	0	0	0	0	0	0	0
													A:292(ASP)	0	0	0	0	0	0	0	0	0
													A:293(GLY)	0	0	0	0	0	0	0	0	0
													A:294(ARG)	0	0.01	-0.01	0	0	0	0	0	0
													A:295(PRO)	0	0	0	0	0	0	0	0	0
													A:296(LEU)	0	0	0	0	0	0	0	0	0
													A:297(THR)	0	0	0	0	0	0	0	0	0
													A:298(ASP)	0	0	0	0	0	0	0	0	0
													A:299(ASP)	0	0	0	0	0	0	0	0	0
													A:300(GLU)	0	0	0	0	0	0	0	0	0
													A:301(VAL)	0	0	0	0	0	0	0	0	0
													A:302(ALA)	0	0	0	0	0	0	0	0	0
													A:303(GLY)	0	0	0	0	0	0	0	0	0
													A:304(MET)	0	0	0	0	0	0	0	0	0
													A:305(LEU)	0	0	0	0	0	0	0	0	0
													A:306(ILE)	0	0	0	0	0	0	0	0	0
													A:307(GLY)	0	0	0	0	0	0	0	0	0
													A:308(LEU)	0	0	0	0	0	0	0	0	0
													A:309(LEU)	0	0	0	0	0	0	0	0	0
													A:310(LEU)	0	0	0	0	0	0	0	0	0
													A:311(ALA)	0	0	0	0	0	0	0	0	0
													A:312(GLY)	0	0	0	0	0	0	0	0	0
													A:313(GLN)	0	0	0	0	0	0	0	0	0
													A:314(ALA)	0	0	0	0	0	0	0	0	0
													A:315(THR)	0	0	0	0	0	0	0	0	0
													A:316(SER)	0	0	0	0	0	0	0	0	0
													A:317(SER)	0	0	0	0	0	0	0	0	0
													A:318(THR)	0	0	0	0	0	0	0	0	0
													A:319(THR)	0	0	0	0	0	0	0	0	0
													A:320(SER)	0	0	0	0	0	0	0	0	0
													A:321(ALA)	0	0	0	0	0	0	0	0	0
													A:322(TRP)	0	0	0	0	0	0	0	0	0
													A:323(MET)	0	0	0	0	0	0	0	0	0
													A:324(GLY)	0	0	0	0	0	0	0	0	0
													A:325(PHE)	0	0	0	0	0	0	0	0	0
													A:326(PHE)	0	0	0	0	0	0	0	0	0
													A:327(LEU)	0	0	0	0	0	0	0	0	0
													A:328(ALA)	0	0	0	0	0	0	0	0	0
													A:329(ARG)	0	0.01	-0.01	0	0	0	0	0	0
													A:330(ASP)	0	-0.01	0.01	0	0	0	0	0	0
													A:331(LYS)	0	0.01	-0.01	0	0	0	0	0	0
													A:332(THR)	0	0	0	0	0	0	0	0	0
													A:333(LEU)	0	0	0	0	0	0	0	0	0
													A:334(GLN)	0	0	0	0	0	0	0	0	0
													A:335(LYS)	0	0.01	-0.01	0	0	0	0	0	0
													A:336(LYS)	0	0.01	-0.01	0	0	0	0	0	0
													A:337(CYS)	0	0	0	0	0	0	0	0	0
													A:338(TYR)	0	0	0	0	0	0	0	0	0
													A:339(LEU)	0	0	0	0	0	0	0	0	0
													A:340(GLU)	0	-0.01	0.01	0	0	0	0	0	0
													A:341(GLN)	0	0	0	0	0	0	0	0	0
													A:342(LYS)	0	0	0	0	0	0	0	0	0
													A:343(THR)	0	0	0	0	0	0	0	0	0
													A:344(VAL)	0	0	0	0	0	0	0	0	0
													A:345(CYS)	0	0	0	0	0	0	0	0	0
													A:346(GLY)	0	0	0	0	0	0	0	0	0
													A:347(GLU)	0	0	0	0	0	0	0	0	0
													A:348(ASN)	0	0	0	0	0	0	0	0	0
													A:349(LEU)	0	0	0	0	0	0	0	0	0
													A:350(PRO)	0	0	0	0	0	0	0	0	0
													A:351(PRO)	0	0	0	0	0	0	0	0	0
													A:352(LEU)	0	0	0	0	0	0	0	0	0
													A:353(THR)	0	0	0	0	0	0	0	0	0
													A:354(TYR)	0	0	0	0	0	0	0	0	0
													A:355(ASP)	0	-0.01	0.01	0	0	0	0	0	0
													A:356(GLN)	0	0	0	0	0	0	0	0	0
													A:357(LEU)	0	0	0	0	0	0	0	0	0
													A:358(LYS)	0	0.01	-0.01	0	0	0	0	0	0
													A:359(ASP)	0	-0.01	0.01	0	0	0	0	0	0
													A:360(LEU)	0	0	0	0	0	0	0	0	0
													A:361(ASN)	0	0	0	0	0	0	0	0	0
													A:362(LEU)	0	0	0	0	0	0	0	0	0
													A:363(LEU)	0	0	0	0	0	0	0	0	0
													A:364(ASP)	0	-0.01	0.01	0	0	0	0	0	0
													A:365(ARG)	0	0.02	-0.02	0	0	0	0	0	0
													A:366(CYS)	0	0	0	0	0	0	0	0	0
													A:367(ILE)	0	0	0	0	0	0	0	0	0
													A:368(LYS)	0	0.02	-0.02	0	0	0	0	0	0
													A:369(GLU)	0	-0.01	0.02	0	0	0	0	0	0
													A:370(THR)	0	0	0	0	0	0	0	0	0
													A:371(LEU)	0	0	0	0	0	0	0	0	0
													A:372(ARG)	0	0.02	-0.02	0	0	0	0	0	0
													A:373(LEU)	0	0	0	0	0	0	0	0	0
													A:374(ARG)	0	0.01	-0.01	0	0	0	0	0	0
													A:375(PRO)	0	0	0	0	0	0	0	0	0
													A:376(PRO)	0	0	0	0	0	0	0	0	0
													A:377(ILE)	0	0	0	0	0	0	0	0	0
													A:378(MET)	0	0	0	0	0	0	0	0	0
													A:379(ILE)	0	0	0	0	0	0	0	0	0
													A:380(MET)	0	0	0	0	0	0	0	0	0
													A:381(MET)	0	0	0	0	0	0	0	0	0
													A:382(ARG)	0	0.01	-0.01	0	0	0	0	0	0
													A:383(MET)	0	0	0	0	0	0	0	0	0
													A:384(ALA)	0	0	0	0	0	0	0	0	0
													A:385(ARG)	0	0.01	-0.01	0	0	0	0	0	0
													A:386(THR)	0	0	0	0	0	0	0	0	0
													A:387(PRO)	0	0	0	0	0	0	0	0	0
													A:388(GLN)	0	0	0	0	0	0	0	0	0
													A:389(THR)	0	0	0	0	0	0	0	0	0
													A:390(VAL)	0	0	0	0	0	0	0	0	0
													A:391(ALA)	0	0	0	0	0	0	0	0	0
													A:392(GLY)	0	0	0	0	0	0	0	0	0
													A:393(TYR)	0	0	0	0	0	0	0	0	0
													A:394(THR)	0	0	0	0	0	0	0	0	0
													A:395(ILE)	0	0	0	0	0	0	0	0	0
													A:396(PRO)	0	0	0	0	0	0	0	0	0
													A:397(PRO)	0	0	0	0	0	0	0	0	0
													A:398(GLY)	0	0	0	0	0	0	0	0	0
													A:399(HIE)	0	0	0	0	0	0	0	0	0
													A:400(GLN)	0	0	0	0	0	0	0	0	0
													A:401(VAL)	0	0	0	0	0	0	0	0	0
													A:402(CYS)	0	0	0	0	0	0	0	0	0
													A:403(VAL)	0	0	0	0	0	0	0	0	0
													A:404(SER)	0	0	0	0	0	0	0	0	0
													A:405(PRO)	0	0	0	0	0	0	0	0	0
													A:406(THR)	0	0	0	0	0	0	0	0	0
													A:407(VAL)	0	0	0	0	0	0	0	0	0
													A:408(ASN)	0	0	0	0	0	0	0	0	0
													A:409(GLN)	0	0	0	0	0	0	0	0	0
													A:410(ARG)	0	0.02	-0.02	0	0	0	0	0	0
													A:411(LEU)	0	0	0	0	0	0	0	0	0
													A:412(LYS)	0	0.01	-0.01	0	0	0	0	0	0
													A:413(ASP)	0	-0.02	0.02	0	0	0	0	0	0
													A:414(SER)	0	0	0	0	0	0	0	0	0
													A:415(TRP)	0	0	0	0	0	0	0	0	0
													A:416(VAL)	0	0	0	0	0	0	0	0	0
													A:417(GLU)	0	-0.02	0.02	0	0	0	0	0	0
													A:418(ARG)	0	0.02	-0.02	0	0	0	0	0	0
													A:419(LEU)	0	0	0	0	0	0	0	0	0
													A:420(ASP)	0	-0.01	0.01	0	0	0	0	0	0
													A:421(PHE)	0	0	0	0	0	0	0	0	0
													A:422(ASN)	0	0	0	0	0	0	0	0	0
													A:423(PRO)	0	0	0	0	0	0	0	0	0
													A:424(ASP)	0	-0.02	0.01	0	0	0	0	0	0
													A:425(ARG)	0	0.02	-0.02	0	0	0	0	0	0
													A:426(TYR)	0	0	0	0	0	0	0	0	0
													A:427(LEU)	0	0	0	0	0	0	0	0	0
													A:428(GLN)	0	0	0	0	0	0	0	0	0
													A:429(ASP)	0.01	-0.03	0.05	0	0	0	0	0	0
													A:430(ASN)	0	0	0	0	0	0	0	0	0
													A:431(PRO)	0	0	0	0	0	0	0	0	0
													A:432(ALA)	0	0	0	0	0	0	0	0	0
													A:433(SER)	0	0	0	0	0	0	0	0	0
													A:434(GLY)	0	0	0	0	0	0	0	0	0
													A:435(GLU)	0	-0.03	0.03	0	0	0	0	0	0
													A:436(LYS)	0	0.03	-0.03	0	0	0	0	0	0
													A:437(PHE)	0	0	0	0	0	0	0	0	0
													A:438(ALA)	0	0	0	0	0	0	0	0	0
													A:439(TYR)	0	0	0	0	0	0	0	0	0
													A:440(VAL)	0	0	0	0	0	0	0	0	0
													A:441(PRO)	0	0	0	0	0	0	0	0	0
													A:442(PHE)	0	0	0	0	0	0	0	0	0
													A:443(GLY)	0	0	0	0	0	0	0	0	0
													A:444(ALA)	0	0	0	0	0	0	0	0	0
													A:445(GLY)	0	0	0	0	0	0	0	0	0
													A:446(ARG)	0	0.02	-0.02	0	0	0	0	0	0
													A:447(HIS)	0	0	0	0	0	0	0	0	0
													A:448(ARG)	0	0.02	-0.02	0	0	0	0	0	0
													A:449(CYS)	0	-0.01	0.01	0	0	0	0	0	0
													A:450(ILE)	0	0	0	0	0	0	0	0	0
													A:451(GLY)	0	0	0	0	0	0	0	0	0
													A:452(GLU)	0	-0.01	0.01	0	0	0	0	0	0
													A:453(ASN)	0	0	0	0	0	0	0	0	0
													A:454(PHE)	0	0	0	0	0	0	0	0	0
													A:455(ALA)	0	0	0	0	0	0	0	0	0
													A:456(TYR)	0	0	0	0	0	0	0	0	0
													A:457(VAL)	0	0	0	0	0	0	0	0	0
													A:458(GLN)	0	0	0	0	0	0	0	0	0
													A:459(ILE)	0	0	0	0	0	0	0	0	0
													A:460(LYS)	0	0.01	-0.01	0	0	0	0	0	0
													A:461(THR)	0	0	0	0	0	0	0	0	0
													A:462(ILE)	0	0	0	0	0	0	0	0	0
													A:463(TRP)	0	0	0	0	0	0	0	0	0
													A:464(SER)	0	0	0	0	0	0	0	0	0
													A:465(THR)	0	0	0	0	0	0	0	0	0
													A:466(MET)	0	0	0	0	0	0	0	0	0
													A:467(LEU)	0	0	0	0	0	0	0	0	0
													A:468(ARG)	0	0.01	-0.01	0	0	0	0	0	0
													A:469(LEU)	0	0	0	0	0	0	0	0	0
													A:470(TYR)	0	0	0	0	0	0	0	0	0
													A:471(GLU)	0	0	0	0	0	0	0	0	0
													A:472(PHE)	0	0	0	0	0	0	0	0	0
													A:473(ASP)	0	-0.01	0.01	0	0	0	0	0	0
													A:474(LEU)	0	0	0	0	0	0	0	0	0
													A:475(ILE)	0	0	0	0	0	0	0	0	0
													A:476(ASP)	0	-0.01	0.01	0	0	0	0	0	0
													A:477(GLY)	0	0	0	0	0	0	0	0	0
													A:478(TYR)	0	0	0	0	0	0	0	0	0
													A:479(PHE)	0	0	0	0	0	0	0	0	0
													A:480(PRO)	0	0	0	0	0	0	0	0	0
													A:481(THR)	0	0	0	0	0	0	0	0	0
													A:482(VAL)	0	0	0	0	0	0	0	0	0
													A:483(ASN)	0	0	0	0	0	0	0	0	0
													A:484(TYR)	0	0	0	0	0	0	0	0	0
													A:485(THR)	0	0	0	0	0	0	0	0	0
													A:486(THR)	0	0	0	0	0	0	0	0	0
													A:487(MET)	0	0	0	0	0	0	0	0	0
													A:488(ILE)	0	0	0	0	0	0	0	0	0
													A:489(HIS)	0	0	0	0	0	0	0	0	0
													A:490(THR)	0	0	0	0	0	0	0	0	0
													A:491(PRO)	0	0	0	0	0	0	0	0	0
													A:492(GLU)	0	-0.01	0.01	0	0	0	0	0	0
													A:493(ASN)	0	0	0	0	0	0	0	0	0
													A:494(PRO)	0	0	0	0	0	0	0	0	0
													A:495(VAL)	0	0	0	0	0	0	0	0	0
													A:496(ILE)	0	0	0	0	0	0	0	0	0
													A:497(ARG)	0	0.01	-0.01	0	0	0	0	0	0
													A:498(TYR)	0	0	0	0	0	0	0	0	0
													A:499(LYS)	0	0	0	0	0	0	0	0	0
													A:500(ARG)	0	0.01	-0.01	0	0	0	0	0	0
													A:501(ARG)	0	0.01	-0.01	0	0	0	0	0	0
													A:502(SER)	0	0	0	0	0	0	0	0	0
													A:601(HEM)	0	-0.04	0.04	0	0	0	0	0	0
													B:58(GLY)	0	0	0	0	0	0	0	0	0
													B:59(LYS)	0	0	0	0	0	0	0	0	0
													B:60(LEU)	-0.01	0	-0.01	0	0	0	0	0	0
													B:61(PRO)	0	0	0	0	0	0	0	0	0
													B:62(PRO)	0.01	0	0.01	0	0	0	0	0	0
													B:63(TYR)	-0.01	0	-0.01	0	0	0	0	0	0
													B:64(ILE)	0.01	0	0.01	0	0	0	0	0	0
													B:65(PHE)	0	0	0	0	0	0	0	0	0
													B:66(SER)	0	0	0	0	0	0	0	0	0
													B:67(PRO)	0	0	0	0	0	0	0	0	0
													B:68(ILE)	0	0	0	0	0	0	0	0	0
													B:69(PRO)	0	0	0	0	0	0	0	0	0
													B:70(PHE)	0.01	0.01	0.01	0	0	0	0	0	0
													B:71(LEU)	0.03	0.01	0.02	0	0	0	0	0	0
													B:72(GLY)	-0.02	0	-0.02	0	0	0	0	0	0
													B:73(HIE)	0.03	0.01	0.02	0	0	0	0	0	0
													B:74(ALA)	0.02	0.01	0.01	0	0	0	0	0	0
													B:75(ILE)	0.03	0.01	0.02	0	0	0	0	0	0
													B:76(ALA)	-0.01	0	-0.01	0	0	0	0	0	0
													B:77(PHE)	0.24	0.02	0.23	0	-0.01	0	0	0	0
													B:78(GLY)	0.05	0.01	0.04	0	0	0	0	0	0
													B:79(LYS)	-0.02	-0.06	0.04	0	0	0	0	0	0
													B:80(SER)	-0.07	-0.01	-0.06	0	0	0	0	0	0
													B:81(PRO)	0	-0.03	0.04	0	-0.01	0	0	0	0
													B:82(ILE)	0.19	-0.01	0.2	0	-0.01	0	0	0	0
													B:83(GLU)	0.07	0.04	0.04	0	0	0	0	0	0
													B:84(PHE)	-0.04	-0.01	-0.03	0	0	0	0	0	0
													B:85(LEU)	0.02	-0.01	0.04	0	0	0	0	0	0
													B:86(GLU)	0.03	0.01	0.02	0	0	0	0	0	0
													B:87(ASN)	0	-0.01	0.01	0	0	0	0	0	0
													B:88(ALA)	-0.03	0	-0.03	0	0	0	0	0	0
													B:89(TYR)	0	0	0	0	0	0	0	0	0
													B:90(GLU)	0.01	0.01	0	0	0	0	0	0	0
													B:91(LYS)	-0.01	-0.02	0.02	0	0	0	0	0	0
													B:92(TYR)	0	0	0	0	0	0	0	0	0
													B:93(GLY)	0.01	0	0.01	0	0	0	0	0	0
													B:94(PRO)	0.01	0	0.02	0	0	0	0	0	0
													B:95(VAL)	-0.03	0	-0.03	0	0	0	0	0	0
													B:96(PHE)	0.1	-0.01	0.11	0	0	0	0	0	0
													B:97(SER)	-0.03	0	-0.03	0	0	0	0	0	0
													B:98(PHE)	0.14	0	0.14	0	0	0	0	0	0
													B:99(THR)	-0.02	-0.01	-0.01	0	0	0	0	0	0
													B:100(MET)	0.07	0	0.08	0	-0.01	0	0	0	0
													B:101(VAL)	0.04	0.01	0.04	0	0	0	0	0	0
													B:102(GLY)	0.01	0	0.01	0	0	0	0	0	0
													B:103(LYS)	-0.03	-0.11	0.09	0	0	0	0	0	0
													B:104(THR)	-0.03	0	-0.03	0	0	0	0	0	0
													B:105(PHE)	0.16	0.01	0.16	0	-0.01	0	0	0	0
													B:106(THR)	0.05	0	0.05	0	0	0	0	0	0
													B:107(TYR)	0.5	-0.01	0.53	0	-0.02	0	0	0	0
													B:108(LEU)	0.13	-0.01	0.14	0	0	0	0	0	0
													B:109(LEU)	0.08	0	0.08	0	0	0	0	0	0
													B:110(GLY)	0.09	-0.01	0.09	0	0	0	0	0	0
													B:111(SER)	0.04	-0.01	0.06	0	0	0	0	0	0
													B:112(ASP)	0	-0.04	0.04	0	0	0	0	0	0
													B:113(ALA)	-0.02	0	-0.02	0	0	0	0	0	0
													B:114(ALA)	0.06	-0.01	0.07	0	0	0	0	0	0
													B:115(ALA)	0.06	-0.01	0.07	0	0	0	0	0	0
													B:116(LEU)	-0.02	0	-0.01	0	0	0	0	0	0
													B:117(LEU)	0.09	0.01	0.1	0	-0.01	0	0	0	0
													B:118(PHE)	0.3	0	0.32	0	-0.01	0	0	0	0
													B:119(ASN)	0.03	-0.01	0.04	0	0	0	0	0	0
													B:120(SER)	-0.02	0	-0.02	0	0	0	0	0	0
													B:121(LYS)	0.07	0.04	0.04	0	0	0	0	0	0
													B:122(ASN)	0.19	0	0.2	0	-0.01	0	0	0	0
													B:123(GLU)	0.03	-0.03	0.07	0	0	0	0	0	0
													B:124(ASP)	-0.05	-0.03	-0.02	0	0	0	0	0	0
													B:125(LEU)	-0.04	0	-0.03	0	-0.01	0	0	0	0
													B:126(ASN)	0.28	0	0.3	0	-0.01	0	0	0	0
													B:127(ALA)	0.28	0.02	0.32	0	-0.06	0	0	0	0
													B:128(GLU)	0.55	-0.02	0.6	0	-0.03	0	0	0	0
													B:129(ASP)	-0.01	0.03	-0.02	0	-0.01	0	0	0	0
													B:130(VAL)	-0.32	0.07	-0.3	0	-0.09	0	0	0	0
													B:131(TYR)	-2.81	-0.08	1.71	0	-2.17	0	-2.27	0	0
													B:132(SER)	0.44	0.03	0.46	0	-0.05	0	0	0	0
													B:133(ARG)	-0.12	-0.15	0.07	0	-0.04	0	0	0	0
													B:134(LEU)	-1.45	-0.03	-0.12	0	-0.83	0	-0.48	0	0
													B:135(THR)	-1.74	-0.06	-0.27	0	-0.91	0	-0.49	0	0
													B:136(THR)	-0.01	-0.01	0.05	0	-0.05	0	0	0	0
													B:137(PRO)	-0.16	-0.02	-0.11	0	-0.03	0	0	0	0
													B:138(VAL)	-0.42	-0.02	-0.27	0	-0.14	0	0	0	0
													B:139(PHE)	-3.97	-0.06	0.71	0	-2.05	0	-2.56	0	0
													B:140(GLY)	0.3	-0.01	0.35	0	-0.03	0	0	0	0
													B:141(LYS)	0.02	-0.03	0.07	0	-0.02	0	0	0	0
													B:142(GLY)	-0.07	-0.01	-0.03	0	-0.03	0	0	0	0
													B:143(VAL)	-1.61	0.06	-0.45	0	-0.72	0	-0.5	0	0
													B:144(ALA)	-1.73	-0.1	-0.15	0	-0.9	0	-0.58	0	0
													B:145(TYR)	-0.68	-0.06	1.8	0	-1.39	0	-1.02	0	0
													B:146(ASP)	0.07	0.01	0.09	0	-0.03	0	0	0	0
													B:147(VAL)	0.14	0.01	0.16	0	-0.03	0	0	0	0
													B:148(PRO)	0.12	0	0.13	0	-0.01	0	0	0	0
													B:149(ASN)	0.25	-0.01	0.27	0	-0.02	0	0	0	0
													B:150(PRO)	-0.02	0	-0.01	0	-0.01	0	0	0	0
													B:151(VAL)	-0.01	-0.01	0.01	0	-0.02	0	0	0	0
													B:152(PHE)	-1.45	-0.04	0.56	0	-1.03	0	-0.95	0	0
													B:153(LEU)	0.09	-0.01	0.12	0	-0.03	0	0	0	0
													B:154(GLU)	0.04	-0.04	0.1	0	-0.02	0	0	0	0
													B:155(GLN)	-0.3	-0.03	0.36	0	-0.49	0	-0.13	0	0
													B:156(LYS)	-1.15	0.09	-0.8	0	-0.44	0	0	0	0
													B:157(LYS)	-0.05	0.05	-0.08	0	-0.02	0	0	0	0
													B:158(MET)	-0.14	0.01	-0.12	0	-0.03	0	0	0	0
													B:159(LEU)	-0.87	0.01	0.1	0	-0.57	0	-0.41	0	0
													B:160(LYS)	-0.06	0.07	-0.12	0	-0.02	0	0	0	0
													B:161(SER)	-0.01	0	0	0	0	0	0	0	0
													B:162(GLY)	-0.11	0	-0.11	0	0	0	0	0	0
													B:163(LEU)	0.05	0	0.08	0	-0.03	0	0	0	0
													B:164(ASN)	0.11	0	0.11	0	0	0	0	0	0
													B:165(ILE)	0.04	0	0.04	0	0	0	0	0	0
													B:166(ALA)	0	0	0	0	0	0	0	0	0
													B:167(HIS)	-0.02	0	-0.02	0	0	0	0	0	0
													B:168(PHE)	0.15	0	0.15	0	0	0	0	0	0
													B:169(LYS)	0.02	0.03	-0.02	0	0	0	0	0	0
													B:170(GLN)	-0.01	0	-0.01	0	0	0	0	0	0
													B:171(HIE)	0.08	0	0.08	0	0	0	0	0	0
													B:172(VAL)	0.03	0	0.03	0	0	0	0	0	0
													B:173(SER)	0.01	0	0.01	0	0	0	0	0	0
													B:174(ILE)	-0.02	0	-0.02	0	0	0	0	0	0
													B:175(ILE)	0.03	0	0.03	0	0	0	0	0	0
													B:176(GLU)	0.02	-0.02	0.04	0	0	0	0	0	0
													B:177(LYS)	0	0.01	-0.02	0	0	0	0	0	0
													B:178(GLU)	-0.01	-0.01	0.01	0	0	0	0	0	0
													B:179(THR)	0.01	0	0.01	0	0	0	0	0	0
													B:180(LYS)	0.01	0.01	-0.01	0	0	0	0	0	0
													B:181(GLU)	0	-0.01	0.01	0	0	0	0	0	0
													B:182(TYR)	0	0	0	0	0	0	0	0	0
													B:183(PHE)	0.02	0	0.02	0	0	0	0	0	0
													B:184(GLU)	0	-0.01	0.01	0	0	0	0	0	0
													B:185(SER)	0	0	0	0	0	0	0	0	0
													B:186(TRP)	0.01	0	0.01	0	0	0	0	0	0
													B:187(GLY)	0	0	0	0	0	0	0	0	0
													B:188(GLU)	0	0	0	0	0	0	0	0	0
													B:189(SER)	0	0	0	0	0	0	0	0	0
													B:190(GLY)	0	0	0	0	0	0	0	0	0
													B:191(GLU)	0	0.01	-0.01	0	0	0	0	0	0
													B:192(LYS)	0	0	0.01	0	0	0	0	0	0
													B:193(ASN)	0.02	-0.01	0.02	0	0	0	0	0	0
													B:194(VAL)	0.03	0	0.03	0	0	0	0	0	0
													B:195(PHE)	0.18	-0.01	0.19	0	-0.01	0	0	0	0
													B:196(GLU)	0.08	0.01	0.07	0	0	0	0	0	0
													B:197(ALA)	0.02	0	0.02	0	0	0	0	0	0
													B:198(LEU)	0.06	0	0.06	0	0	0	0	0	0
													B:199(SER)	0.07	-0.01	0.08	0	0	0	0	0	0
													B:200(GLU)	0.1	-0.01	0.11	0	0	0	0	0	0
													B:201(LEU)	0.02	0	0.02	0	0	0	0	0	0
													B:202(ILE)	0.12	0	0.13	0	-0.01	0	0	0	0
													B:203(ILE)	0.17	0	0.18	0	-0.01	0	0	0	0
													B:204(LEU)	0.03	0	0.04	0	0	0	0	0	0
													B:205(THR)	-0.02	0	-0.02	0	0	0	0	0	0
													B:206(ALA)	-0.01	0	-0.01	0	-0.01	0	0	0	0
													B:207(SER)	-0.01	0	-0.01	0	0	0	0	0	0
													B:208(HIS)	0.01	0	0.01	0	0	0	0	0	0
													B:209(CYS)	-0.13	0	-0.14	0	0	0	0	0	0
													B:210(LEU)	-0.02	0	-0.01	0	-0.01	0	0	0	0
													B:211(HIE)	0.02	-0.01	0.04	0	-0.02	0	0	0	0
													B:212(GLY)	0.07	0	0.07	0	0	0	0	0	0
													B:213(LYS)	0.01	0.02	-0.01	0	0	0	0	0	0
													B:214(GLU)	0	-0.01	0.01	0	0	0	0	0	0
													B:215(ILE)	0.03	0	0.03	0	0	0	0	0	0
													B:216(ARG)	-0.04	0.03	-0.06	0	0	0	0	0	0
													B:217(SER)	0.01	0	0.01	0	0	0	0	0	0
													B:218(GLN)	-0.02	0	-0.03	0	0	0	0	0	0
													B:219(LEU)	0.03	0	0.03	0	0	0	0	0	0
													B:220(ASN)	0.04	0	0.04	0	0	0	0	0	0
													B:221(GLU)	0.03	-0.01	0.04	0	0	0	0	0	0
													B:222(LYS)	0	0	0	0	0	0	0	0	0
													B:223(VAL)	0.05	0	0.05	0	0	0	0	0	0
													B:224(ALA)	0.1	0	0.1	0	0	0	0	0	0
													B:225(GLN)	0.07	0	0.06	0	0	0	0	0	0
													B:226(LEU)	0.05	0.01	0.05	0	-0.01	0	0	0	0
													B:227(TYR)	0.33	0	0.36	0	-0.03	0	0	0	0
													B:228(ALA)	0.1	0.01	0.1	0	-0.01	0	0	0	0
													B:229(ASP)	0.06	0.05	0.02	0	-0.01	0	0	0	0
													B:230(LEU)	0.04	0.03	0.06	0	-0.05	0	0	0	0
													B:231(ALA)	0.09	0.04	0.15	0	-0.1	0	0	0	0
													B:232(GLY)	-0.04	0.02	-0.04	0	-0.02	0	0	0	0
													B:233(GLY)	-0.36	0.04	-0.35	0	-0.04	0	0	0	0
													B:234(PHE)	-4.04	-0.04	1.36	0	-2.39	0	-2.97	0	0
													B:235(SER)	0.19	0.04	0.19	0	-0.05	0	0	0	0
													B:236(HIE)	0.52	0.17	0.41	0	-0.06	0	0	0	0
													B:237(ALA)	0.08	0.01	0.08	0	-0.01	0	0	0	0
													B:238(ALA)	-0.17	-0.02	-0.14	0	-0.01	0	0	0	0
													B:239(TRP)	0.38	0.05	0.44	0	-0.11	0	0	0	0
													B:240(LEU)	0.07	-0.01	0.09	0	-0.01	0	0	0	0
													B:241(LEU)	0.04	0.02	0.02	0	0	0	0	0	0
													B:242(PRO)	0	0	0	0	0	0	0	0	0
													B:243(GLY)	0.02	0.02	0	0	0	0	0	0	0
													B:244(TRP)	0.12	0.01	0.12	0	-0.01	0	0	0	0
													B:245(LEU)	0.04	0	0.04	0	0	0	0	0	0
													B:246(PRO)	-0.05	0	-0.05	0	0	0	0	0	0
													B:247(LEU)	0	-0.02	0.04	0	-0.02	0	0	0	0
													B:248(PRO)	-0.02	-0.01	-0.01	0	-0.01	0	0	0	0
													B:249(SER)	0.05	-0.01	0.07	0	-0.01	0	0	0	0
													B:250(PHE)	0.16	-0.01	0.18	0	-0.01	0	0	0	0
													B:251(ARG)	0.02	-0.06	0.08	0	0	0	0	0	0
													B:252(ARG)	-0.16	-0.07	-0.08	0	-0.01	0	0	0	0
													B:253(ARG)	-0.24	-0.04	-0.18	0	-0.01	0	0	0	0
													B:254(ASP)	0.09	0.01	0.08	0	0	0	0	0	0
													B:255(ARG)	-0.03	-0.03	0	0	0	0	0	0	0
													B:256(ALA)	-0.06	0	-0.06	0	0	0	0	0	0
													B:257(HIE)	-0.02	0.01	-0.02	0	-0.01	0	0	0	0
													B:258(ARG)	0.02	-0.01	0.03	0	0	0	0	0	0
													B:259(GLU)	0	0	0	0	0	0	0	0	0
													B:260(ILE)	0.01	0	0.02	0	-0.01	0	0	0	0
													B:261(LYS)	0.01	0.01	0	0	0	0	0	0	0
													B:262(ASP)	0	-0.01	0.01	0	0	0	0	0	0
													B:263(ILE)	-0.02	0	-0.01	0	0	0	0	0	0
													B:264(PHE)	0.04	0	0.04	0	0	0	0	0	0
													B:265(TYR)	0.01	0	0.01	0	0	0	0	0	0
													B:266(LYS)	-0.01	0	-0.01	0	0	0	0	0	0
													B:267(ALA)	-0.02	0	-0.02	0	0	0	0	0	0
													B:268(ILE)	0.01	0	0.01	0	0	0	0	0	0
													B:269(GLN)	0	0	0	0	0	0	0	0	0
													B:270(LYS)	0	0.01	-0.01	0	0	0	0	0	0
													B:271(ARG)	-0.01	0.02	-0.03	0	0	0	0	0	0
													B:272(ARG)	0	0.01	-0.01	0	0	0	0	0	0
													B:273(GLN)	0	0	0	0	0	0	0	0	0
													B:274(SER)	0	0	0	0	0	0	0	0	0
													B:275(GLN)	0	0	0	0	0	0	0	0	0
													B:276(GLU)	0.01	-0.02	0.02	0	0	0	0	0	0
													B:277(LYS)	0	0.02	-0.02	0	0	0	0	0	0
													B:278(ILE)	0	0	0	0	0	0	0	0	0
													B:279(ASP)	0.01	-0.03	0.04	0	0	0	0	0	0
													B:280(ASP)	0.05	-0.03	0.07	0	0	0	0	0	0
													B:281(ILE)	0.1	0	0.11	0	-0.01	0	0	0	0
													B:282(LEU)	0.09	0	0.1	0	0	0	0	0	0
													B:283(GLN)	0.01	0	0.01	0	0	0	0	0	0
													B:284(THR)	-0.11	0	-0.1	0	0	0	0	0	0
													B:285(LEU)	0.03	0	0.05	0	-0.01	0	0	0	0
													B:286(LEU)	0.01	0	0.01	0	0	0	0	0	0
													B:287(ASP)	-0.01	-0.02	0.01	0	0	0	0	0	0
													B:288(ALA)	-0.03	0	-0.04	0	0	0	0	0	0
													B:289(THR)	-0.02	0	-0.02	0	0	0	0	0	0
													B:290(TYR)	0.14	-0.01	0.16	0	-0.01	0	0	0	0
													B:291(LYS)	0.01	0.03	-0.02	0	0	0	0	0	0
													B:292(ASP)	0.02	-0.02	0.04	0	0	0	0	0	0
													B:293(GLY)	-0.01	0	-0.01	0	0	0	0	0	0
													B:294(ARG)	0.02	0.03	-0.01	0	0	0	0	0	0
													B:295(PRO)	-0.02	0	-0.02	0	0	0	0	0	0
													B:296(LEU)	0	0.01	0.01	0	-0.01	0	0	0	0
													B:297(THR)	0.1	-0.01	0.11	0	0	0	0	0	0
													B:298(ASP)	0.06	-0.02	0.09	0	0	0	0	0	0
													B:299(ASP)	0.12	-0.02	0.15	0	-0.01	0	0	0	0
													B:300(GLU)	0.29	-0.05	0.39	0	-0.04	0	0	0	0
													B:301(VAL)	0.17	0	0.19	0	-0.03	0	0	0	0
													B:302(ALA)	0.15	0.01	0.17	0	-0.03	0	0	0	0
													B:303(GLY)	0.16	0.04	0.53	0	-0.37	0	-0.04	0	0
													B:304(MET)	-1.4	0.05	0.18	0	-1.01	0	-0.63	0	0
													B:305(LEU)	0.21	0.02	0.28	0	-0.09	0	0	0	0
													B:306(ILE)	-0.07	-0.02	0.12	0	-0.17	0	0	0	0
													B:307(GLY)	-1.75	-0.34	0.12	0	-1.16	0	-0.38	0	0
													B:308(LEU)	-0.39	-0.02	0.36	0	-0.53	0	-0.2	0	0
													B:309(LEU)	0.01	-0.02	0.11	0	-0.08	0	0	0	0
													B:310(LEU)	-1.47	0	-0.23	0	-0.84	0	-0.41	0	0
													B:311(ALA)	-2.11	0.04	-0.48	0	-0.99	0	-0.69	0	0
													B:312(GLY)	0.04	-0.01	0.1	0	-0.06	0	0	0	0
													B:313(GLN)	-0.02	0.01	0.03	0	-0.05	0	0	0	0
													B:314(ALA)	-0.55	0.05	-0.35	0	-0.19	0	-0.06	0	0
													B:315(THR)	-0.47	0.02	0.01	0	-0.36	0	-0.14	0	0
													B:316(SER)	0.21	0.02	0.21	0	-0.02	0	0	0	0
													B:317(SER)	-0.22	0.01	-0.22	0	-0.01	0	0	0	0
													B:318(THR)	-0.19	0.02	-0.2	0	-0.02	0	0	0	0
													B:319(THR)	-0.05	0.01	-0.05	0	-0.01	0	0	0	0
													B:320(SER)	-0.14	0.01	-0.14	0	0	0	0	0	0
													B:321(ALA)	-0.05	0	-0.04	0	0	0	0	0	0
													B:322(TRP)	0.12	0	0.13	0	-0.01	0	0	0	0
													B:323(MET)	0.04	0	0.04	0	0	0	0	0	0
													B:324(GLY)	0	0	0	0	0	0	0	0	0
													B:325(PHE)	0.02	0	0.02	0	0	0	0	0	0
													B:326(PHE)	0.04	0	0.04	0	0	0	0	0	0
													B:327(LEU)	0	0	0	0	0	0	0	0	0
													B:328(ALA)	0	0	0	0	0	0	0	0	0
													B:329(ARG)	0	0	0	0	0	0	0	0	0
													B:330(ASP)	0	0	0.01	0	0	0	0	0	0
													B:331(LYS)	0	0	0	0	0	0	0	0	0
													B:332(THR)	0	0	0	0	0	0	0	0	0
													B:333(LEU)	0	0	0	0	0	0	0	0	0
													B:334(GLN)	0	0	0	0	0	0	0	0	0
													B:335(LYS)	0	0	0	0	0	0	0	0	0
													B:336(LYS)	0	0.01	-0.01	0	0	0	0	0	0
													B:337(CYS)	0	0	0	0	0	0	0	0	0
													B:338(TYR)	0	0	0	0	0	0	0	0	0
													B:339(LEU)	0	0	0	0	0	0	0	0	0
													B:340(GLU)	0	-0.02	0.02	0	0	0	0	0	0
													B:341(GLN)	0	0	0	0	0	0	0	0	0
													B:342(LYS)	0	0.01	-0.01	0	0	0	0	0	0
													B:343(THR)	0	0	0	0	0	0	0	0	0
													B:344(VAL)	0	0	0	0	0	0	0	0	0
													B:345(CYS)	0	0	0	0	0	0	0	0	0
													B:346(GLY)	0	0	0	0	0	0	0	0	0
													B:347(GLU)	0	-0.01	0.01	0	0	0	0	0	0
													B:348(ASN)	0	0	0	0	0	0	0	0	0
													B:349(LEU)	0	0	0	0	0	0	0	0	0
													B:350(PRO)	0	0	0	0	0	0	0	0	0
													B:351(PRO)	0	0	0	0	0	0	0	0	0
													B:352(LEU)	0	0	0	0	0	0	0	0	0
													B:353(THR)	0	0	0	0	0	0	0	0	0
													B:354(TYR)	0.01	0	0.01	0	0	0	0	0	0
													B:355(ASP)	0	-0.02	0.02	0	0	0	0	0	0
													B:356(GLN)	0	0	0	0	0	0	0	0	0
													B:357(LEU)	0.01	0	0.01	0	0	0	0	0	0
													B:358(LYS)	0	0.02	-0.02	0	0	0	0	0	0
													B:359(ASP)	0	-0.02	0.02	0	0	0	0	0	0
													B:360(LEU)	0	0	0.01	0	0	0	0	0	0
													B:361(ASN)	0.01	0	0.01	0	0	0	0	0	0
													B:362(LEU)	0	0	0.01	0	0	0	0	0	0
													B:363(LEU)	0.03	0	0.03	0	0	0	0	0	0
													B:364(ASP)	0.06	-0.04	0.1	0	0	0	0	0	0
													B:365(ARG)	0.01	0.03	-0.02	0	0	0	0	0	0
													B:366(CYS)	-0.01	0	-0.01	0	0	0	0	0	0
													B:367(ILE)	0.12	0	0.12	0	0	0	0	0	0
													B:368(LYS)	0.06	0.04	0.03	0	0	0	0	0	0
													B:369(GLU)	0.06	-0.02	0.08	0	0	0	0	0	0
													B:370(THR)	-0.03	0.01	-0.03	0	0	0	0	0	0
													B:371(LEU)	0.16	0	0.18	0	-0.01	0	0	0	0
													B:372(ARG)	-0.11	0.03	-0.14	0	0	0	0	0	0
													B:373(LEU)	-0.04	0	-0.04	0	0	0	0	0	0
													B:374(ARG)	-0.34	-0.03	-0.3	0	-0.01	0	0	0	0
													B:375(PRO)	-0.01	0.03	-0.02	0	-0.03	0	0	0	0
													B:376(PRO)	-0.04	0.08	0.03	0	-0.15	0	0	0	0
													B:377(ILE)	-4.06	0.02	0.1	0	-2.11	0	-2.08	0	0
													B:378(MET)	-0.16	-0.16	0.24	0	-0.24	0	-0.01	0	0
													B:379(ILE)	-1.35	-2.87	2.45	0	-0.46	-0.27	-0.2	0	0
													B:380(MET)	-1.33	0.05	-0.63	0	-0.53	0	-0.21	0	0
													B:381(MET)	-0.55	-0.14	0.24	0	-0.49	0	-0.16	0	0
													B:382(ARG)	-1.41	0.36	-1.65	0	-0.11	0	0	0	0
													B:383(MET)	0.12	-0.01	0.14	0	-0.01	0	0	0	0
													B:384(ALA)	0.03	0	0.03	0	0	0	0	0	0
													B:385(ARG)	-0.02	0.04	-0.05	0	0	0	0	0	0
													B:386(THR)	0.04	0	0.04	0	0	0	0	0	0
													B:387(PRO)	-0.01	0	-0.01	0	0	0	0	0	0
													B:388(GLN)	0.01	0	0.01	0	0	0	0	0	0
													B:389(THR)	0	0	0	0	0	0	0	0	0
													B:390(VAL)	0.02	0	0.01	0	0	0	0	0	0
													B:391(ALA)	0	0	0	0	0	0	0	0	0
													B:392(GLY)	0	0	0	0	0	0	0	0	0
													B:393(TYR)	0	0	0	0	0	0	0	0	0
													B:394(THR)	-0.01	0	-0.01	0	0	0	0	0	0
													B:395(ILE)	0.02	0	0.02	0	0	0	0	0	0
													B:396(PRO)	0.02	0	0.02	0	0	0	0	0	0
													B:397(PRO)	-0.02	0	-0.02	0	0	0	0	0	0
													B:398(GLY)	-0.02	0.01	-0.03	0	0	0	0	0	0
													B:399(HIS)	0.03	-0.01	0.04	0	0	0	0	0	0
													B:400(GLN)	0.02	0.01	0.02	0	-0.01	0	0	0	0
													B:401(VAL)	0.2	-0.01	0.22	0	-0.01	0	0	0	0
													B:402(CYS)	-0.18	0.06	-0.22	0	-0.02	0	0	0	0
													B:403(VAL)	0.3	-0.07	0.4	0	-0.03	0	0	0	0
													B:404(SER)	-0.14	0.04	-0.17	0	-0.02	0	0	0	0
													B:405(PRO)	-0.06	0.04	-0.06	0	-0.03	0	0	0	0
													B:406(THR)	0.26	-0.02	0.29	0	-0.01	0	0	0	0
													B:407(VAL)	0.03	0.01	0.03	0	0	0	0	0	0
													B:408(ASN)	-0.01	0.02	-0.03	0	0	0	0	0	0
													B:409(GLN)	0.14	-0.02	0.16	0	0	0	0	0	0
													B:410(ARG)	-0.03	-0.01	-0.01	0	0	0	0	0	0
													B:411(LEU)	0.03	0	0.03	0	0	0	0	0	0
													B:412(LYS)	0.01	-0.01	0.02	0	0	0	0	0	0
													B:413(ASP)	0	-0.01	0.01	0	0	0	0	0	0
													B:414(SER)	0	0	0	0	0	0	0	0	0
													B:415(TRP)	0.07	0	0.06	0	0	0	0	0	0
													B:416(VAL)	0	0	0	0	0	0	0	0	0
													B:417(GLU)	0	-0.01	0.01	0	0	0	0	0	0
													B:418(ARG)	-0.01	0	-0.01	0	0	0	0	0	0
													B:419(LEU)	0	0	0	0	0	0	0	0	0
													B:420(ASP)	0.01	0	0.01	0	0	0	0	0	0
													B:421(PHE)	0.02	0	0.01	0	0	0	0	0	0
													B:422(ASN)	-0.01	0	0	0	0	0	0	0	0
													B:423(PRO)	0	0	0	0	0	0	0	0	0
													B:424(ASP)	0	-0.01	0.02	0	0	0	0	0	0
													B:425(ARG)	-0.01	0.03	-0.04	0	0	0	0	0	0
													B:426(TYR)	0.03	0	0.03	0	0	0	0	0	0
													B:427(LEU)	0	0	0	0	0	0	0	0	0
													B:428(GLN)	0	0	0	0	0	0	0	0	0
													B:429(ASP)	0	-0.02	0.02	0	0	0	0	0	0
													B:430(ASN)	0.01	0	0.01	0	0	0	0	0	0
													B:431(PRO)	-0.01	0	0	0	0	0	0	0	0
													B:432(ALA)	0	0	0.01	0	0	0	0	0	0
													B:433(SER)	0	0	0	0	0	0	0	0	0
													B:434(GLY)	0	0	0	0	0	0	0	0	0
													B:435(GLU)	-0.01	-0.03	0.02	0	0	0	0	0	0
													B:436(LYS)	-0.02	0.04	-0.05	0	0	0	0	0	0
													B:437(PHE)	0.01	0	0.02	0	0	0	0	0	0
													B:438(ALA)	0.07	0	0.07	0	0	0	0	0	0
													B:439(TYR)	-0.07	0	-0.07	0	0	0	0	0	0
													B:440(VAL)	0.15	-0.03	0.19	0	-0.01	0	0	0	0
													B:441(PRO)	0.17	-0.03	0.22	0	-0.02	0	0	0	0
													B:442(PHE)	0.33	0	0.36	0	-0.04	0	0	0	0
													B:443(GLY)	-0.2	0.03	-0.22	0	-0.01	0	0	0	0
													B:444(ALA)	0.33	-0.02	0.36	0	-0.01	0	0	0	0
													B:445(GLY)	0.06	-0.01	0.07	0	0	0	0	0	0
													B:446(ARG)	-0.15	0.1	-0.24	0	-0.01	0	0	0	0
													B:447(HIS)	0.14	0	0.17	0	-0.03	0	0	0	0
													B:448(ARG)	-0.11	0.13	-0.2	0	-0.03	0	0	0	0
													B:449(CYS)	1.05	-0.07	1.2	0	-0.08	0	0	0	0
													B:450(ILE)	-0.22	0.01	-0.14	0	-0.09	0	0	0	0
													B:451(GLY)	-0.3	0.02	-0.29	0	-0.02	0	0	0	0
													B:452(GLU)	0.17	-0.08	0.26	0	-0.01	0	0	0	0
													B:453(ASN)	0.08	0.01	0.08	0	0	0	0	0	0
													B:454(PHE)	0.07	0.01	0.07	0	-0.01	0	0	0	0
													B:455(ALA)	-0.05	0.01	-0.06	0	-0.01	0	0	0	0
													B:456(TYR)	0.12	0.01	0.12	0	0	0	0	0	0
													B:457(VAL)	-0.03	0	-0.03	0	0	0	0	0	0
													B:458(GLN)	0.1	0	0.11	0	-0.01	0	0	0	0
													B:459(ILE)	0.08	0.01	0.07	0	0	0	0	0	0
													B:460(LYS)	0.02	0.04	-0.02	0	0	0	0	0	0
													B:461(THR)	-0.06	0	-0.06	0	0	0	0	0	0
													B:462(ILE)	0.01	0	0.01	0	0	0	0	0	0
													B:463(TRP)	0.07	0	0.07	0	0	0	0	0	0
													B:464(SER)	0	0	-0.01	0	0	0	0	0	0
													B:465(THR)	-0.02	0	-0.02	0	0	0	0	0	0
													B:466(MET)	0.01	0	0.01	0	0	0	0	0	0
													B:467(LEU)	0.01	0	0.01	0	0	0	0	0	0
													B:468(ARG)	0	0.02	-0.02	0	0	0	0	0	0
													B:469(LEU)	0	0	0	0	0	0	0	0	0
													B:470(TYR)	0	0	0	0	0	0	0	0	0
													B:471(GLU)	0	0	0	0	0	0	0	0	0
													B:472(PHE)	0.01	0	0.01	0	0	0	0	0	0
													B:473(ASP)	0	0	0	0	0	0	0	0	0
													B:474(LEU)	0	0	0	0	0	0	0	0	0
													B:475(ILE)	0	0	0	0	0	0	0	0	0
													B:476(ASP)	0	0.01	-0.01	0	0	0	0	0	0
													B:477(GLY)	0	0	0	0	0	0	0	0	0
													B:478(TYR)	0	0	0	0	0	0	0	0	0
													B:479(PHE)	0	0	0	0	0	0	0	0	0
													B:480(PRO)	0	0	0.01	0	0	0	0	0	0
													B:481(THR)	0.04	-0.01	0.05	0	0	0	0	0	0
													B:482(VAL)	-0.11	0	-0.1	0	0	0	0	0	0
													B:483(ASN)	0.07	0.04	0.04	0	-0.01	0	0	0	0
													B:484(TYR)	0.15	0.01	0.15	0	-0.01	0	0	0	0
													B:485(THR)	0	0.03	-0.02	0	-0.01	0	0	0	0
													B:486(THR)	-0.39	-0.04	-0.28	0	-0.06	0	0	0	0
													B:487(MET)	-2.69	-0.14	0.03	0	-1.65	0	-0.92	0	0
													B:488(ILE)	-0.99	0.13	0.75	0	-1.15	0	-0.73	0	0
													B:489(HIS)	0.08	-0.05	0.18	0	-0.05	0	0	0	0
													B:490(THR)	-0.02	0	0	0	-0.02	0	0	0	0
													B:491(PRO)	0	0	0.01	0	0	0	0	0	0
													B:492(GLU)	0.07	0.06	0.01	0	0	0	0	0	0
													B:493(ASN)	0.01	0	0.01	0	0	0	0	0	0
													B:494(PRO)	0.02	0	0.02	0	0	0	0	0	0
													B:495(VAL)	0	0	0	0	0	0	0	0	0
													B:496(ILE)	0.01	0	0.01	0	0	0	0	0	0
													B:497(ARG)	0	-0.01	0.01	0	0	0	0	0	0
													B:498(TYR)	0	0	0	0	0	0	0	0	0
													B:499(LYS)	0	0	0	0	0	0	0	0	0
													B:500(ARG)	0	0.01	-0.01	0	0	0	0	0	0
													B:501(ARG)	0	0.01	-0.01	0	0	0	0	0	0
													B:502(SER)	0	0	0	0	0	0	0	0	0
													B:601(HEM)	17.74	-1.07	27.89	0	-5.01	0	-4.06	0	0
													B:602(LAN)	-43.42	-3.95	14.67	0	-34.56	-0.27	-23.27	0	0
													Z:999(UNK)	0	0	0	0	0	0	0	0	0
